# Supplementary material for: Spatiotemporal regulation of circular RNA expression during the developmentof skeletal muscle, subcutaneous fat, and liver in Ningxiang pigs
Source: Research Square preprint supplement (doi:10.21203/rs.3.rs-124585/v1), 2020-12-11
Supplement: Supplementary file 1 [file 0301a6ac3ef34aa1e7ced3f8.xls]

## Sheet: sheet
circRNA id	Host gene id	N210D_M1	N210D_M2	N210D_M3	N150D_M1	N150D_M2	N150D_M3	N90D_M1	N90D_M2	N90D_M3	N30D_M1	N30D_M2	N30D_M3	muscle
Chr01_103594729_103605128		0	0	0	0	0	0	0	0	0	0.0229421	0.0382381	0	0.005098
Chr01_134987666_135001147	Pig.02305	0.198686	0.264263	0.233458	0.411107	0.341933	0.209558	0.0696735	0.0902864	0.0435727	0.0458842	0.142027	0.0376217	0.174006
Chr01_176448874_176466186	Pig.00707	0.027405	0.0132131	0.0274656	0.0404368	0.0547092	0.0722614	0.201279	0.0138902	0.0217864	0	0	0	0.039371
Chr01_243632999_243642380	Pig.05180	0.0342562	0	0	0.0202184	0.0341933	0.0144523	0.061932	0	0.0508348	0.0401487	0.0819388	0.0376217	0.0313
Chr01_37930886_37959001	Pig.03277	0.472736	0.303902	0.377653	0.673947	0.198321	0.101166	0.0541905	0.0347255	0.0217864	0.0458842	0.0983266	0.0107491	0.199449
Chr02_15158593_15165811	Pig.17377	0.0137025	0	0.034332	0.0336973	0.10258	0.0361307	0.077415	0.0555608	0.0508348	0	0	0	0.033688
Chr02_159713586_159713781		0.027405	0	0.0274656	0.148268	0.0615479	0.144523	0.232245	0.104177	0.152505	0.556346	0.322293	0.478333	0.187926
Chr03_71892828_71898777	Pig.13433	0.897513	0.67387	0.933832	1.83313	1.35405	0.354081	1.99731	1.95157	2.96295	0.275305	0.16934	0.40309	1.1505
Chr04_110746736_110758056	Pig.01703,MSTRG.12387	0.027405	0.0132131	0	0.0134789	0.020516	0.0216784	0.015483	0.0416706	0.0726212	0	0	0	0.018839
Chr04_36821977_36836417	Pig.01495	0.589207	0.403001	0.36392	0.815475	2.0174	0.0578091	1.21542	1.2779	1.71386	0.172066	0.0983266	0.214981	0.744947
Chr05_42398007_42403290	MSTRG.13728,Pig.20735	0.0342562	0.0198197	0.0411985	0.0404368	0.116257	0.0216784	0.0696735	0.0833413	0.0798833	0.0745618	0.092864	0.0806179	0.062882
Chr05_554154_555152	Pig.18444	0.0137025	0.0132131	0.0411985	0.0539157	0.0820638	0.0289045	0.0387075	0.0486157	0.0290485	0	0	0	0.029114
Chr05_60053380_60062312	Pig.09568	0.335711	0.706903	0.775904	0.512199	2.09263	0.419116	0.356109	0.944534	0.835144	0.11471	0.185728	0.0429962	0.61014
Chr05_66678018_66707603	Pig.07503	0	0	0	0	0	0	0	0.0208353	0	0.0172066	0.0163878	0.0161236	0.005879
Chr06_12677380_12679356	Pig.12446	0.0753637	0.0528526	0.0274656	0.12805	0.0615479	0.0867136	0.077415	0.0833413	0.0290485	0	0	0	0.051816
Chr06_168400991_168401622		0.0479587	0.0198197	0.0823969	0.0471763	0.157289	0.0289045	0.0541905	0.0763962	0.0726212	0	0	0	0.048896
Chr06_49667205_49680000	Pig.02792	0.150727	0.138738	0.281523	0.539157	0.635995	0.903267	0.294177	0.763962	0.319533	0.0401487	0.0546259	0.0591198	0.348414
Chr06_63650554_63691247		0.0822149	0.118918	0.164794	0.229142	0.0547092	0.0361307	0.0232245	0.0208353	0.0290485	0	0	0	0.063251
Chr06_81552679_81556789		0	0.0264263	0.0274656	0.0269579	0.0341933	0.0433568	0.046449	0.062506	0.0798833	0.0688263	0.0874014	0.0376217	0.045091
Chr07_78284059_78313084	MSTRG.20541	0	0	0	0	0	0	0	0.0138902	0.0217864	1.75507	1.98292	0.365468	0.344928
Chr08_20846343_20878523	Pig.16697	0.0959174	0.0726723	0.0892633	0.215663	0.184644	0.0794875	0.147089	0.159737	0.196077	0.0344131	0.0437007	0.0322472	0.112576
Chr08_28917574_28926864	Pig.07260	0.027405	0	0.0274656	0.0336973	0.020516	0	0.0232245	0.0277804	0.0290485	0	0	0	0.015761
Chr08_82362096_82402170	Pig.01089	0.0890662	0.092492	0.0961297	0.134789	0.423996	0.0361307	0.0541905	0.270859	0.283223	0.0229421	0.0109252	0	0.126229
Chr09_109177641_109208969	Pig.11684	0	0.0132131	0.034332	0.0134789	0.0273546	0.0216784	0.0541905	0.0277804	0	0	0	0	0.016002
Chr09_16522266_16542844	Pig.04694	0.0479587	0.138738	0.240324	0	0.109418	0	0.0232245	0.0902864	0.0290485	0	0	0	0.056583
Chr09_8107518_8117610	Pig.14368	0.0411075	0	0.0274656	0.0202184	0.0341933	0.0867136	0.0851565	0.062506	0.0871455	0.0688263	0.092864	0.0752434	0.056787
Chr10_79750648_79751650	Pig.09964,MSTRG.27211	0.184984	0.204804	0.260924	0.195445	0.136773	0.0216784	0.201279	0.305585	0.23965	0.011471	0.0163878	0.0483708	0.152279
Chr11_50455535_50541934	Pig.04491	0.0137025	0	0.0274656	0	0	0.0361307	0.0387075	0.0138902	0.0290485	0	0	0	0.013245
Chr11_52476173_52507914	Pig.04496	0.246645	0.237836	0.192259	0.404368	0.273546	0.628674	0.642545	0.729236	0.334058	0.825915	1.04335	0.816928	0.53128
Chr11_56028794_56032206	Pig.04511	0.931769	1.07026	0.672908	0.869391	1.2378	0.368533	1.3238	1.54876	3.4132	0.149124	0.163878	0.338595	1.00733
Chr11_56028794_56037997	Pig.04511	0.602909	0.528526	0.254057	0.539157	0.916379	0.0650352	0.735443	0.68062	1.2854	0.0630907	0.0600885	0.134363	0.488755
Chr11_56028794_56044515	Pig.04511	0	0.0264263	0.034332	0.0336973	0.0410319	0.0216784	0	0.0138902	0.0435727	0	0	0	0.017886
Chr11_56028794_56048891	Pig.04511	0.0685124	0.0528526	0.0686641	0.175226	0.0683865	0.0794875	0.046449	0.0694511	0.123456	0.0172066	0	0.0161236	0.065485
Chr12_40853263_40853381	MSTRG.29689	0.0137025	0	0	0.0202184	0	0	0.092898	0.0347255	0.0290485	0.103239	0.131102	0.0806179	0.042129
Chr12_48595782_48605968	Pig.19046	0.0753637	0.0132131	0.034332	0.0471763	0.0547092	0.0939398	0.147089	0.0694511	0.145242	0.108975	0.152952	0.188109	0.094213
Chr12_56004263_56093033		0	0	0	0	0	0	0	0	0	0.0573552	0.0163878	0.0214981	0.007937
Chr13_12812644_12829260		0	0.0264263	0.130462	0.0336973	0.0957411	0	0.046449	0.0416706	0.058097	0	0	0	0.036045
Chr13_28582593_28610417	Pig.01536	0	0.0132131	0.034332	0.0202184	0.0341933	0.0216784	0.0387075	0.0347255	0.0653591	0	0	0	0.021869
Chr13_53391484_53428936	Pig.06070	0.541248	0.832428	0.666042	0.741341	0.71122	0.22401	0.077415	0.187518	0.123456	0.154859	0.142027	0.0859925	0.373963
Chr13_86836296_86842481	Pig.11303	1.61689	1.56576	3.01435	0.208923	0.649672	0.151749	4.16493	3.19475	2.04066	0.303983	0.46432	1.26839	1.5537
Chr13_98873441_98889700	Pig.06482	0.184984	0.330328	0.260924	0.37741	0.417158	0.0722614	0.0232245	0.0416706	0	0.0286776	0.092864	0	0.152458
Chr13_98885382_98889700	Pig.06482	0.253496	0.21141	0.302122	0.49872	0.499222	0.13007	0.046449	0.0694511	0.0726212	0.0516197	0.103789	0.0644943	0.191955
Chr14_20015252_20015712	Pig.10671,MSTRG.33945	0.267199	0.0990985	0.233458	0.0539157	0.109418	0.0361307	0.688994	0.513938	0.573708	0.527668	0.469782	0.79543	0.364062
Chr14_39164972_39170296	Pig.07737	0.0685124	0.112312	0.109863	0.107831	0.157289	0.108392	0.25547	0.118067	0.261436	0.0344131	0.0273129	0.0429962	0.116991
Chr14_90028374_90037704	Pig.02027	0.411075	0.535132	0.748439	0.734602	1.2036	0.216784	1.06833	1.58348	1.51778	0.235156	0.196653	0.241854	0.724408
Chr15_107979484_107995904		0	0.0264263	0.0480649	0.101092	0.0478706	0.050583	0.046449	0.0277804	0.0726212	0	0	0	0.035074
Chr15_107979484_108030953		0.178132	0.112312	0.157927	0.444805	0.307739	0.0939398	0	0.0138902	0	0.0229421	0.0491633	0.0107491	0.115967
Chr15_108518521_108523889	Pig.00007	0	0.0198197	0.0274656	0.0202184	0.0615479	0.0433568	0.077415	0.062506	0.058097	0.0860328	0.092864	0.0644943	0.051151
Chr15_114533496_114560459	MSTRG.37316	1.9526	1.69128	1.7578	2.89123	2.96114	0.758744	0.332885	0.722291	0.152505	0.579288	0.693748	0.521329	1.25124
Chr15_121744453_121761784	Pig.14206	0.0753637	0.0330328	0.0205992	0.0741341	0.157289	0.0289045	0.301919	0.215298	0.116194	0.16633	0.355068	0.300974	0.153759
Chr15_78573219_78637426	Pig.00183	0.05481	0.0132131	0.0205992	0.0606552	0.0273546	0.0361307	0	0	0	0	0.0109252	0.0107491	0.019536
Chr17_51000006_51005416	Pig.09982	0.27405	0.132131	0.157927	0.289797	0.465028	0.101166	0.232245	0.416706	0.464776	0.0630907	0.0491633	0.0752434	0.226777
Chr18_18270856_18358987	MSTRG.40398	0.102769	0.0264263	0.0205992	0.0202184	0.10258	0	0.147089	0.138902	0.130718	0	0	0	0.057442
ChrX_103903248_103914281		0.335711	0.270869	0.398252	0.795257	0.540254	0.0939398	0.348368	0.736181	0.573708	0.0688263	0.109252	0.145112	0.367977
Scaffold288_854949_855512	Pig.17809	0.0342562	0.0198197	0.0961297	0.0606552	0.0136773	0.0144523	0.0851565	0.0347255	0.23965	0	0	0	0.049877
