# Supplementary material for: Spatiotemporal regulation of circular RNA expression during the developmentof skeletal muscle, subcutaneous fat, and liver in Ningxiang pigs
Source: Research Square preprint supplement (doi:10.21203/rs.3.rs-124585/v1), 2020-12-11
Supplement: Supplementary file 2 [file 2aaeffffa458850675fe3c21.xlsx]

## Sheet: muscle_ceRNA
ceRNA1	ceRNA2	ceRNA1_name	ceRNA2_name	ceRNA1_type	ceRNA2_type	hit_mirna_num	pvalue	corr	corr_pvalue	corr_qvalue	hit_mirna_corr	ceRNA1_gene	ceRNA1_gene_name	ceRNA1_gene_description	ceRNA2_gene	ceRNA2_gene_name	ceRNA2_gene_description	regu_similar	sens_corr
Chr15_32091371_32100097	MSTRG.30891.2	Pig.08949	MSTRG.30891	circRNA	mRNA	1	0.0421053	0.683116	0.014339	0.155729	mir-361:ssc-miR-361-3p(-0.72537009966|-0.811188811189)	Pig.08949	PTPN4-201	band 4.1-like protein 5 isoform X1 [Sus scrofa]	MSTRG.30891			0.944149	0.447852
Chr15_32091371_32100097	MSTRG.21578.1	Pig.08949	MSTRG.21578	circRNA	mRNA	1	0.0263158	0.584522	0.045932	0.227326	mir-361:ssc-miR-361-3p(-0.72537009966|-0.776223776224)	Pig.08949	PTPN4-201	band 4.1-like protein 5 isoform X1 [Sus scrofa]	MSTRG.21578			0.966134	0.535045
Chr06_61249444_61283077	Pig.22141.1	MSTRG.15623,Pig.03622	Pig.22141	circRNA	mRNA	1	0.0263158	0.594737	0.0413791	0.221137	mir-504:ssc-miR-504(-0.588442233404|-0.647986983213)	MSTRG.15623,Pig.03622	OSBPL1A-205	oxysterol-binding protein-related protein 1 isoform X1 [Sus scrofa]	Pig.22141	DGKQ-202	diacylglycerol kinase theta isoform X1 [Sus scrofa]	0.951841	0.248155
Chr06_61249444_61283077	Pig.17909.1	MSTRG.15623,Pig.03622	Pig.17909	circRNA	mRNA	1	0.0263158	0.621053	0.0311377	0.201718	mir-504:ssc-miR-504(-0.588442233404|-0.644484350871)	MSTRG.15623,Pig.03622	OSBPL1A-205	oxysterol-binding protein-related protein 1 isoform X1 [Sus scrofa]	Pig.17909	PARP12-201	poly [ADP-ribose]	0.954545	0.229914
Chr06_61249444_61283077	Pig.06432.1	MSTRG.15623,Pig.03622	Pig.06432	circRNA	mRNA	1	0.0515177	0.640982	0.0247	0.186127	mir-181:ssc-miR-181b(-0.693521203655|-0.608391608392)	MSTRG.15623,Pig.03622	OSBPL1A-205	oxysterol-binding protein-related protein 1 isoform X1 [Sus scrofa]	Pig.06432	NOTCH3-201	neurogenic locus notch homolog protein 3 [Sus scrofa]	0.934612	0.257871
Chr06_61249444_61283077	Pig.16028.1	MSTRG.15623,Pig.03622	Pig.16028	circRNA	mRNA	1	0.0986861	0.63269	0.0272482	0.194255	mir-504:ssc-miR-504(-0.588442233404|-0.63158283524)	MSTRG.15623,Pig.03622	OSBPL1A-205	oxysterol-binding protein-related protein 1 isoform X1 [Sus scrofa]	Pig.16028	WDR62-201	WD repeat-containing protein 62 [Sus scrofa]	0.96464	0.21627
Chr06_61249444_61283077	MSTRG.18963.2	MSTRG.15623,Pig.03622	MSTRG.18963	circRNA	mRNA	2	0.0107826	0.658495	0.0198921	0.173534	ssc-miR-1842(-0.619965924479|-0.671328671329);Chr12_28094(-0.670175438596|-0.774081747514)	MSTRG.15623,Pig.03622	OSBPL1A-205	oxysterol-binding protein-related protein 1 isoform X1 [Sus scrofa]	MSTRG.18963			0.996621	0.301491
Chr06_61249444_61283077	Pig.08828.1	MSTRG.15623,Pig.03622	Pig.08828	circRNA	mRNA	1	0.0756323	0.823119	0.00100495	0.0847874	mir-504:ssc-miR-504(-0.588442233404|-0.657342657343)	MSTRG.15623,Pig.03622	OSBPL1A-205	oxysterol-binding protein-related protein 1 isoform X1 [Sus scrofa]	Pig.08828	UNC45A-201	protein unc-45 homolog A isoform X2 [Sus scrofa]	0.944693	0.107044
Chr06_61249444_61283077	Pig.18656.1	MSTRG.15623,Pig.03622	Pig.18656	circRNA	mRNA	1	0.0756323	0.602453	0.0381595	0.216593	mir-504:ssc-miR-504(-0.588442233404|-0.748251748252)	MSTRG.15623,Pig.03622	OSBPL1A-205	oxysterol-binding protein-related protein 1 isoform X1 [Sus scrofa]	Pig.18656	ARRB2-201	beta-arrestin-2 isoform X3 [Sus scrofa]	0.880444	0.300158
Chr06_61249444_61283077	Pig.21446.1	MSTRG.15623,Pig.03622	Pig.21446	circRNA	mRNA	1	0.0263158	0.581437	0.0473736	0.23044	Chr12_28094(-0.670175438596|-0.86865282074)	MSTRG.15623,Pig.03622	OSBPL1A-205	oxysterol-binding protein-related protein 1 isoform X1 [Sus scrofa]	Pig.21446	CYBA-201	cytochrome b-245 light chain isoform X1 [Sus scrofa]	0.87102	0.583376
Chr06_61249444_61283077	Pig.11482.1	MSTRG.15623,Pig.03622	Pig.11482	circRNA	mRNA	1	0.0263158	0.626971	0.0291129	0.198294	mir-504:ssc-miR-504(-0.588442233404|-0.664335664336)	MSTRG.15623,Pig.03622	OSBPL1A-205	oxysterol-binding protein-related protein 1 isoform X1 [Sus scrofa]	Pig.11482	SMYD5-201	homeobox protein notochord [Sus scrofa]	0.93942	0.236377
Chr06_61249444_61283077	Pig.21030.1	MSTRG.15623,Pig.03622	Pig.21030	circRNA	mRNA	1	0.0263158	0.721542	0.00807444	0.128514	Chr05_13105(-0.697329407335|-0.717862645974)	MSTRG.15623,Pig.03622	OSBPL1A-205	oxysterol-binding protein-related protein 1 isoform X1 [Sus scrofa]	Pig.21030	Gm42048	gag protein [Porcine endogenous retrovirus C]	0.985491	0.278738
Chr06_61249444_61283077	Pig.19810.1	MSTRG.15623,Pig.03622	Pig.19810	circRNA	mRNA	1	0.0756323	0.591945	0.0425902	0.223159	Chr05_13105(-0.697329407335|-0.739616059488)	MSTRG.15623,Pig.03622	OSBPL1A-205	oxysterol-binding protein-related protein 1 isoform X1 [Sus scrofa]	Pig.19810	RNF213	PREDICTED: LOW QUALITY PROTEIN: E3 ubiquitin-protein ligase RNF213 [Balaenoptera acutorostrata scammoni]	0.970572	0.434006
Chr06_61249444_61283077	Pig.08573.1	MSTRG.15623,Pig.03622	Pig.08573	circRNA	mRNA	1	0.0263158	0.74386	0.00554191	0.119527	ssc-miR-1842(-0.619965924479|-0.812610703272)	MSTRG.15623,Pig.03622	OSBPL1A-205	oxysterol-binding protein-related protein 1 isoform X1 [Sus scrofa]	Pig.08573	MIIP-201	migration and invasion-inhibitory protein [Sus scrofa]	0.865526	0.218875
Chr06_61249444_61283077	MSTRG.21693.1	MSTRG.15623,Pig.03622	MSTRG.21693	circRNA	mRNA	1	0.120705	0.582456	0.0468938	0.23044	Chr12_28094(-0.670175438596|-0.652631578947)	MSTRG.15623,Pig.03622	OSBPL1A-205	oxysterol-binding protein-related protein 1 isoform X1 [Sus scrofa]	MSTRG.21693			0.986737	0.324469
Chr17_12953690_12957546	Pig.14223.1	Pig.13489	Pig.14223	circRNA	mRNA	1	0.0105263	0.623598	0.0302549	0.199692	mir-379:ssc-miR-758(-0.623597854078|-0.692307692308)	Pig.13489	CRLS1-201	LOW QUALITY PROTEIN: cardiolipin synthase (CMP-forming) [Sus scrofa]	Pig.14223	TERB1-201	NEDD8-activating enzyme E1 regulatory subunit [Sus scrofa]	0.947785	0.283458
Chr07_95086666_95104859	Pig.15991.1	MSTRG.20849	Pig.15991	circRNA	mRNA	1	0.0986861	0.654946	0.0208059	0.174251	Chr07_20261(-0.594405594406|-0.711285243356)	MSTRG.20849			Pig.15991	CD22-201	B-cell receptor CD22 [Sus scrofa]	0.910484	0.244236
Chr07_95086666_95104859	MSTRG.30891.2	MSTRG.20849	MSTRG.30891	circRNA	mRNA	1	0.180804	0.797203	0.00190037	0.0915734	mir-874:ssc-miR-874(-0.671328671329|-0.783216783217)	MSTRG.20849			MSTRG.30891			0.923077	0.208231
Chr07_95086666_95104859	Pig.11889.1	MSTRG.20849	Pig.11889	circRNA	mRNA	1	0.0756323	0.587413	0.0446093	0.225097	Chr07_20261(-0.594405594406|-0.748251748252)	MSTRG.20849			Pig.11889	E2F1-201	transcription factor E2F1 [Sus scrofa]	0.885417	0.32003
Chr07_95086666_95104859	MSTRG.21578.1	MSTRG.20849	MSTRG.21578	circRNA	mRNA	1	0.120705	0.839161	0.000642826	0.0767553	mir-874:ssc-miR-874(-0.671328671329|-0.657342657343)	MSTRG.20849			MSTRG.21578			0.989474	0.126815
Chr07_95086666_95104859	Pig.22659.1	MSTRG.20849	Pig.22659	circRNA	mRNA	1	0.0756323	0.587413	0.0446093	0.225097	Chr07_20261(-0.594405594406|-0.79020979021)	MSTRG.20849			Pig.22659	GALK1-202	galactokinase [Sus scrofa]	0.858586	0.348569
Chr06_137024884_137037367	Pig.15991.1	Pig.15005	Pig.15991	circRNA	mRNA	3	0.000561479	0.751773	0.00480664	0.117053	ChrX_42092(-0.894388375309|-0.676073102596);Chr03_8533(-0.845091378245|-0.61973367738);Chr07_20261(-0.957770228677|-0.711285243356)	Pig.15005	HEATR3-201	HEAT repeat-containing protein 3 isoform X1 [Sus scrofa]	Pig.15991	CD22-201	B-cell receptor CD22 [Sus scrofa]	0.996817	0.305514
Chr06_137024884_137037367	MSTRG.19396.1	Pig.15005	MSTRG.19396	circRNA	mRNA	2	0.0166572	0.654946	0.0208059	0.174251	Chr03_9544(-0.633818533684|-0.853146853147);Chr12_28849(-0.6901579589|-0.587412587413)	Pig.15005	HEATR3-201	HEAT repeat-containing protein 3 isoform X1 [Sus scrofa]	MSTRG.19396			0.985888	0.300384
Chr06_137024884_137037367	Pig.16949.1	Pig.15005	Pig.16949	circRNA	mRNA	1	0.109663	0.760582	0.00407753	0.107613	Chr11_26361(-0.669030674444|-0.594405594406)	Pig.15005	HEATR3-201	HEAT repeat-containing protein 3 isoform X1 [Sus scrofa]	Pig.16949	ARAP3-201	arf-GAP with Rho-GAP domain, ANK repeat and PH domain-containing protein 3 isoform X6 [Sus scrofa]	0.940935	0.153394
Chr06_137024884_137037367	Pig.20594.1	Pig.15005	Pig.20594	circRNA	mRNA	1	0.196555	0.601771	0.0384366	0.216593	mir-423:ssc-miR-423-5p(-0.612691249227|-0.899836760121)	Pig.15005	HEATR3-201	HEAT repeat-containing protein 3 isoform X1 [Sus scrofa]	Pig.20594	LRRC14-202	leucine-rich repeat-containing protein 14 [Sus scrofa]	0.810155	0.455441
Chr06_137024884_137037367	Pig.16324.1	Pig.15005	Pig.16324	circRNA	mRNA	2	0.00306321	0.746497	0.00528802	0.119527	Chr07_20261(-0.957770228677|-0.65034965035);ChrX_42092(-0.894388375309|-0.58041958042)	Pig.15005	HEATR3-201	HEAT repeat-containing protein 3 isoform X1 [Sus scrofa]	Pig.16324	HOOK2-202	protein Hook homolog 2 isoform X2 [Sus scrofa]	0.959067	0.151403
Chr06_137024884_137037367	Pig.12664.1	Pig.15005	Pig.12664	circRNA	mRNA	3	0.000146643	0.903011	5.73241e-05	0.0511857	ChrX_42092(-0.894388375309|-0.893171247131);Chr03_8533(-0.845091378245|-0.847637026689);Chr07_20261(-0.957770228677|-0.93170020289)	Pig.15005	HEATR3-201	HEAT repeat-containing protein 3 isoform X1 [Sus scrofa]	Pig.12664	CCDC24-202	coiled-coil domain-containing protein 24 isoform X2 [Sus scrofa]	0.999999	0.47701
Chr06_137024884_137037367	Pig.07970.1	Pig.15005	Pig.07970	circRNA	mRNA	2	0.0264187	0.767625	0.00355762	0.103583	mir-423:ssc-miR-423-5p(-0.612691249227|-0.594405594406);Chr12_28849(-0.6901579589|-0.629370629371)	Pig.15005	HEATR3-201	HEAT repeat-containing protein 3 isoform X1 [Sus scrofa]	Pig.07970	LLGL2-202	lethal(2) giant larvae protein homolog 2 [Sus scrofa]	0.998824	0.153927
Chr06_137024884_137037367	Pig.22620.1	Pig.15005	Pig.22620	circRNA	mRNA	2	0.0501986	0.72537	0.00758833	0.127324	mir-423:ssc-miR-423-5p(-0.612691249227|-0.643356643357);Chr12_28094(-0.835990537728|-0.72504489473)	Pig.15005	HEATR3-201	HEAT repeat-containing protein 3 isoform X1 [Sus scrofa]	Pig.22620	RGS12-201	LOW QUALITY PROTEIN: regulator of G-protein signaling 12 [Sus scrofa]	0.997176	0.293921
Chr06_137024884_137037367	Pig.11826.1	Pig.15005	Pig.11826	circRNA	mRNA	1	0.0578947	0.859176	0.000342671	0.0703934	Chr11_26361(-0.669030674444|-0.65034965035)	Pig.15005	HEATR3-201	HEAT repeat-containing protein 3 isoform X1 [Sus scrofa]	Pig.11826	SLC46A1-201	solute carrier family 46, member 1 [Sus scrofa]	0.985841	0.108057
Chr06_137024884_137037367	Pig.14132.1	Pig.15005	Pig.14132	circRNA	mRNA	2	0.00306321	0.640861	0.0247359	0.186127	ChrX_42092(-0.894388375309|-0.769230769231);Chr03_8533(-0.845091378245|-0.636363636364)	Pig.15005	HEATR3-201	HEAT repeat-containing protein 3 isoform X1 [Sus scrofa]	Pig.14132	MYH3-201	LOW QUALITY PROTEIN: myosin-3 [Sus scrofa]	0.987245	0.598342
Chr06_137024884_137037367	Pig.06432.1	Pig.15005	Pig.06432	circRNA	mRNA	1	0.109663	0.72537	0.00758833	0.127324	Chr12_28849(-0.6901579589|-0.594405594406)	Pig.15005	HEATR3-201	HEAT repeat-containing protein 3 isoform X1 [Sus scrofa]	Pig.06432	NOTCH3-201	neurogenic locus notch homolog protein 3 [Sus scrofa]	0.925459	0.183844
Chr06_137024884_137037367	Pig.13535.1	Pig.15005	Pig.13535	circRNA	mRNA	1	0.0578947	0.663149	0.0187389	0.169932	Chr07_20261(-0.957770228677|-0.577934336379)	Pig.15005	HEATR3-201	HEAT repeat-containing protein 3 isoform X1 [Sus scrofa]	Pig.13535	ETV7-201	transcription factor ETV7 isoform X1 [Sus scrofa]	0.752663	0.195988
Chr06_137024884_137037367	Pig.08754.1	Pig.15005	Pig.08754	circRNA	mRNA	3	0.000146643	0.811299	0.00135962	0.0864374	Chr07_20261(-0.957770228677|-0.749563321122);Chr03_8533(-0.845091378245|-0.651489615555);ChrX_42092(-0.894388375309|-0.739055424097)	Pig.15005	HEATR3-201	HEAT repeat-containing protein 3 isoform X1 [Sus scrofa]	Pig.08754	HJURP-201	Holliday junction recognition protein [Sus scrofa]	0.998387	0.267195
Chr06_137024884_137037367	MSTRG.18963.2	Pig.15005	MSTRG.18963	circRNA	mRNA	2	0.0501986	0.612691	0.0341681	0.207077	Chr03_9544(-0.633818533684|-0.874125874126);Chr12_28094(-0.835990537728|-0.774081747514)	Pig.15005	HEATR3-201	HEAT repeat-containing protein 3 isoform X1 [Sus scrofa]	MSTRG.18963			0.986563	0.584186
Chr06_137024884_137037367	Pig.18699.1	Pig.15005	Pig.18699	circRNA	mRNA	1	0.232484	0.831007	0.000811316	0.0795415	Chr12_28849(-0.6901579589|-0.762237762238)	Pig.15005	HEATR3-201	HEAT repeat-containing protein 3 isoform X1 [Sus scrofa]	Pig.18699	NCAPD2-202	condensin complex subunit 1 isoform X1 [Sus scrofa]	0.950372	0.180008
Chr06_137024884_137037367	Pig.12266.1	Pig.15005	Pig.12266	circRNA	mRNA	1	0.109663	0.845091	0.000538366	0.0742364	Chr12_28849(-0.6901579589|-0.608391608392)	Pig.15005	HEATR3-201	HEAT repeat-containing protein 3 isoform X1 [Sus scrofa]	Pig.12266	PLIN3-201	perilipin-5 [Sus scrofa]	0.937033	0.104732
Chr06_137024884_137037367	Pig.10552.1	Pig.15005	Pig.10552	circRNA	mRNA	1	0.109663	0.838049	0.000664043	0.0767553	Chr12_28849(-0.6901579589|-0.671328671329)	Pig.15005	HEATR3-201	HEAT repeat-containing protein 3 isoform X1 [Sus scrofa]	Pig.10552	IQGAP3-201	ras GTPase-activating-like protein IQGAP3 isoform X1 [Sus scrofa]	0.98617	0.139385
Chr06_137024884_137037367	Pig.17042.1	Pig.15005	Pig.17042	circRNA	mRNA	3	0.000146643	0.880304	0.000157757	0.0630114	ChrX_42092(-0.894388375309|-0.748251748252);Chr03_8533(-0.845091378245|-0.692307692308);Chr07_20261(-0.957770228677|-0.846153846154)	Pig.15005	HEATR3-201	HEAT repeat-containing protein 3 isoform X1 [Sus scrofa]	Pig.17042	C1QTNF6-201	complement C1q tumor necrosis factor-related protein 6 precursor [Sus scrofa]	0.999359	0.236086
Chr06_137024884_137037367	Pig.18741.1	Pig.15005	Pig.18741	circRNA	mRNA	1	0.109663	0.78308	0.00259375	0.0962432	Chr12_28849(-0.6901579589|-0.718039630047)	Pig.15005	HEATR3-201	HEAT repeat-containing protein 3 isoform X1 [Sus scrofa]	Pig.18741	AFF2-201	AF4/FMR2 family member 2 isoform X3 [Sus scrofa]	0.9802	0.21223
Chr06_137024884_137037367	Pig.02573.1	Pig.15005	Pig.02573	circRNA	mRNA	1	0.0578947	0.739455	0.00598623	0.119527	mir-423:ssc-miR-423-5p(-0.612691249227|-0.601398601399)	Pig.15005	HEATR3-201	HEAT repeat-containing protein 3 isoform X1 [Sus scrofa]	Pig.02573	DBN1-201	drebrin isoform X1 [Sus scrofa]	0.990699	0.151924
Chr06_137024884_137037367	Pig.21446.1	Pig.15005	Pig.21446	circRNA	mRNA	1	0.0578947	0.788752	0.00229539	0.0938036	Chr12_28094(-0.835990537728|-0.86865282074)	Pig.15005	HEATR3-201	HEAT repeat-containing protein 3 isoform X1 [Sus scrofa]	Pig.21446	CYBA-201	cytochrome b-245 light chain isoform X1 [Sus scrofa]	0.980839	0.558609
Chr06_137024884_137037367	Pig.00055.1	Pig.15005	Pig.00055	circRNA	mRNA	1	0.0578947	0.788752	0.00229539	0.0938036	Chr12_28849(-0.6901579589|-0.587412587413)	Pig.15005	HEATR3-201	HEAT repeat-containing protein 3 isoform X1 [Sus scrofa]	Pig.00055	MARS2-202	methionine--tRNA ligase, mitochondrial isoform X1 [Sus scrofa]	0.919578	0.134187
Chr06_137024884_137037367	Pig.03913.1	Pig.15005	Pig.03913	circRNA	mRNA	1	0.0578947	0.669031	0.0173522	0.164599	Chr12_28849(-0.6901579589|-0.65034965035)	Pig.15005	HEATR3-201	HEAT repeat-containing protein 3 isoform X1 [Sus scrofa]	Pig.03913	SPAG8-203	sperm-associated antigen 8 [Sus scrofa]	0.970304	0.268485
Chr06_137024884_137037367	Pig.16362.1	Pig.15005	Pig.16362	circRNA	mRNA	1	0.109663	0.676073	0.0157928	0.160844	mir-423:ssc-miR-423-5p(-0.612691249227|-0.748251748252)	Pig.15005	HEATR3-201	HEAT repeat-containing protein 3 isoform X1 [Sus scrofa]	Pig.16362	Hps6	Hermansky-Pudlak syndrome 6 protein [Sus scrofa]	0.900392	0.261004
Chr06_137024884_137037367	Pig.17052.1	Pig.15005	Pig.17052	circRNA	mRNA	1	0.0578947	0.871264	0.000223466	0.0630114	Chr12_28849(-0.6901579589|-0.679510674288)	Pig.15005	HEATR3-201	HEAT repeat-containing protein 3 isoform X1 [Sus scrofa]	Pig.17052	FOXRED2-201	FAD-dependent oxidoreductase domain-containing protein 2 precursor [Sus scrofa]	0.992226	0.113538
Chr06_137024884_137037367	Pig.11889.1	Pig.15005	Pig.11889	circRNA	mRNA	3	0.000146643	0.823964	0.000982639	0.0847874	Chr07_20261(-0.957770228677|-0.748251748252);Chr03_8533(-0.845091378245|-0.664335664336);ChrX_42092(-0.894388375309|-0.776223776224)	Pig.15005	HEATR3-201	HEAT repeat-containing protein 3 isoform X1 [Sus scrofa]	Pig.11889	E2F1-201	transcription factor E2F1 [Sus scrofa]	0.998692	0.264107
Chr06_137024884_137037367	Pig.09309.1	Pig.15005	Pig.09309	circRNA	mRNA	3	0.000561479	0.809879	0.00140794	0.0868545	ChrX_42092(-0.894388375309|-0.615384615385);Chr03_8533(-0.845091378245|-0.636363636364);Chr07_20261(-0.957770228677|-0.706293706294)	Pig.15005	HEATR3-201	HEAT repeat-containing protein 3 isoform X1 [Sus scrofa]	Pig.09309	CUL7-201	cullin-7 isoform X2 [Sus scrofa]	0.995814	0.126148
Chr06_137024884_137037367	Pig.12332.1	Pig.15005	Pig.12332	circRNA	mRNA	1	0.109663	0.866219	0.000268443	0.0636259	Chr11_26361(-0.669030674444|-0.65034965035)	Pig.15005	HEATR3-201	HEAT repeat-containing protein 3 isoform X1 [Sus scrofa]	Pig.12332	SPPL2B-201	signal peptide peptidase-like 2B isoform X1 [Sus scrofa]	0.985841	0.102626
Chr06_137024884_137037367	Pig.14333.1	Pig.15005	Pig.14333	circRNA	mRNA	1	0.0578947	0.802837	0.00166751	0.0904396	Chr11_26361(-0.669030674444|-0.783216783217)	Pig.15005	HEATR3-201	HEAT repeat-containing protein 3 isoform X1 [Sus scrofa]	Pig.14333	LCMT2	tRNA wybutosine-synthesizing protein 4 [Sus scrofa]	0.921373	0.199423
Chr06_137024884_137037367	Pig.17268.1	Pig.15005	Pig.17268	circRNA	mRNA	1	0.0578947	0.767625	0.00355762	0.103583	Chr07_20261(-0.957770228677|-0.664335664336)	Pig.15005	HEATR3-201	HEAT repeat-containing protein 3 isoform X1 [Sus scrofa]	Pig.17268	ATP5F1B	ATP synthase subunit beta, mitochondrial [Sus scrofa]	0.819103	0.156477
Chr06_137024884_137037367	MSTRG.34975.2	Pig.15005	MSTRG.34975	circRNA	mRNA	1	0.0578947	0.797189	0.00190095	0.0915734	Chr12_28849(-0.6901579589|-0.728547527072)	Pig.15005	HEATR3-201	HEAT repeat-containing protein 3 isoform X1 [Sus scrofa]	MSTRG.34975			0.97294	0.203333
Chr06_137024884_137037367	Pig.16786.1	Pig.15005	Pig.16786	circRNA	mRNA	2	0.0166572	0.885374	0.000128186	0.0630114	mir-423:ssc-miR-423-5p(-0.612691249227|-0.658494880238);Chr12_28849(-0.6901579589|-0.672505409605)	Pig.15005	HEATR3-201	HEAT repeat-containing protein 3 isoform X1 [Sus scrofa]	Pig.16786	TTYH1-201	protein tweety homolog 1 isoform X1 [Sus scrofa]	0.999267	0.0869936
Chr06_137024884_137037367	Pig.11856.1	Pig.15005	Pig.11856	circRNA	mRNA	1	0.109663	0.712532	0.00931039	0.134449	mir-423:ssc-miR-423-5p(-0.612691249227|-0.644484350871)	Pig.15005	HEATR3-201	HEAT repeat-containing protein 3 isoform X1 [Sus scrofa]	Pig.11856	TP53I13-201	LOW QUALITY PROTEIN: tumor protein p53-inducible protein 13 [Sus scrofa]	0.974711	0.186858
Chr06_137024884_137037367	Pig.20023.1	Pig.15005	Pig.20023	circRNA	mRNA	1	0.0578947	0.894388	8.64551e-05	0.0609819	Chr12_28849(-0.6901579589|-0.685314685315)	Pig.15005	HEATR3-201	HEAT repeat-containing protein 3 isoform X1 [Sus scrofa]	Pig.20023	MYADML2-201	myeloid-associated differentiation marker-like protein 2 [Sus scrofa]	0.996479	0.0947468
Chr06_137024884_137037367	Pig.19256.1	Pig.15005	Pig.19256	circRNA	mRNA	1	0.196555	0.670213	0.0170829	0.164599	ChrX_42092(-0.894388375309|-0.581000322543)	Pig.15005	HEATR3-201	HEAT repeat-containing protein 3 isoform X1 [Sus scrofa]	Pig.19256	CDC42BPG-201	LOW QUALITY PROTEIN: serine/threonine-protein kinase MRCK gamma [Sus scrofa]	0.787589	0.25661
Chr06_137024884_137037367	Pig.23396.1	Pig.15005	Pig.23396	circRNA	mRNA	3	0.000146643	0.816922	0.00118061	0.0854743	ChrX_42092(-0.894388375309|-0.734265734266);Chr03_8533(-0.845091378245|-0.685314685315);Chr07_20261(-0.957770228677|-0.769230769231)	Pig.15005	HEATR3-201	HEAT repeat-containing protein 3 isoform X1 [Sus scrofa]	Pig.23396	FDXR-201	NADPH:adrenodoxin oxidoreductase, mitochondrial isoform X1 [Sus scrofa]	0.99887	0.292029
Chr06_137024884_137037367	Pig.19812.1	Pig.15005	Pig.19812	circRNA	mRNA	1	0.109663	0.816922	0.00118061	0.0854743	Chr03_9544(-0.633818533684|-0.818181818182)	Pig.15005	HEATR3-201	HEAT repeat-containing protein 3 isoform X1 [Sus scrofa]	Pig.19812	SGSH-201	N-sulphoglucosamine sulphohydrolase [Sus scrofa]	0.873028	0.146067
Chr06_137024884_137037367	Pig.14704.1	Pig.15005	Pig.14704	circRNA	mRNA	1	0.109663	0.683116	0.014339	0.155729	Chr12_28849(-0.6901579589|-0.657342657343)	Pig.15005	HEATR3-201	HEAT repeat-containing protein 3 isoform X1 [Sus scrofa]	Pig.14704	PLXND1-201	plexin-D1 isoform X1 [Sus scrofa]	0.975647	0.26238
Chr06_137024884_137037367	Pig.18305.1	Pig.15005	Pig.18305	circRNA	mRNA	4	6.27351e-06	0.809879	0.00140794	0.0868545	Chr03_8533(-0.845091378245|-0.629370629371);Chr07_20261(-0.957770228677|-0.755244755245);Chr18_40848(-0.580678731386|-0.587281589659);ChrX_42092(-0.894388375309|-0.629370629371)	Pig.15005	HEATR3-201	HEAT repeat-containing protein 3 isoform X1 [Sus scrofa]	Pig.18305	CYGB	cytoglobin isoform X1 [Sus scrofa]	0.999608	0.172294
Chr06_137024884_137037367	MSTRG.34668.1	Pig.15005	MSTRG.34668	circRNA	mRNA	1	0.0578947	0.851064	0.000446978	0.0714832	Chr12_28849(-0.6901579589|-0.721848885584)	Pig.15005	HEATR3-201	HEAT repeat-containing protein 3 isoform X1 [Sus scrofa]	MSTRG.34668			0.977556	0.146455
Chr06_137024884_137037367	Pig.10835.1	Pig.15005	Pig.10835	circRNA	mRNA	2	0.0264187	0.744278	0.005501	0.119527	Chr03_9544(-0.633818533684|-0.844134394348);Chr12_28849(-0.6901579589|-0.605955395113)	Pig.15005	HEATR3-201	HEAT repeat-containing protein 3 isoform X1 [Sus scrofa]	Pig.10835	DISP1-201	protein dispatched homolog 1 isoform X3 [Sus scrofa]	0.987765	0.208767
Chr06_137024884_137037367	Pig.10642.1	Pig.15005	Pig.10642	circRNA	mRNA	2	0.00874971	0.760582	0.00407753	0.107613	Chr07_20261(-0.957770228677|-0.636363636364);ChrX_42092(-0.894388375309|-0.622377622378)	Pig.15005	HEATR3-201	HEAT repeat-containing protein 3 isoform X1 [Sus scrofa]	Pig.10642	IGSF8-201	immunoglobulin superfamily member 8 [Sus scrofa]	0.963594	0.128729
Chr06_137024884_137037367	Pig.12679.1	Pig.15005	Pig.12679	circRNA	mRNA	1	0.109663	0.711285	0.00949192	0.134875	Chr12_28849(-0.6901579589|-0.65034965035)	Pig.15005	HEATR3-201	HEAT repeat-containing protein 3 isoform X1 [Sus scrofa]	Pig.12679	TIE1-201	tyrosine-protein kinase receptor Tie-1 isoform X6 [Sus scrofa]	0.970304	0.233873
Chr06_137024884_137037367	Pig.15860.1	Pig.15005	Pig.15860	circRNA	mRNA	1	0.263901	0.705477	0.0103725	0.139892	Chr12_28849(-0.6901579589|-0.588442233404)	Pig.15005	HEATR3-201	HEAT repeat-containing protein 3 isoform X1 [Sus scrofa]	Pig.15860	BSN-201	protein bassoon isoform X2 [Sus scrofa]	0.920448	0.193845
Chr06_137024884_137037367	MSTRG.7156.1	Pig.15005	MSTRG.7156	circRNA	mRNA	2	0.0264187	0.78171	0.00267007	0.0972726	Chr07_20261(-0.957770228677|-0.657342657343);ChrX_42092(-0.894388375309|-0.594405594406)	Pig.15005	HEATR3-201	HEAT repeat-containing protein 3 isoform X1 [Sus scrofa]	MSTRG.7156			0.9624	0.0830497
Chr06_137024884_137037367	Pig.09950.1	Pig.15005	Pig.09950	circRNA	mRNA	1	0.0578947	0.871264	0.000223466	0.0630114	Chr12_28849(-0.6901579589|-0.70402910068)	Pig.15005	HEATR3-201	HEAT repeat-containing protein 3 isoform X1 [Sus scrofa]	Pig.09950	FANCC	Fanconi anemia group C protein isoform X1 [Sus scrofa]	0.990051	0.121397
Chr06_137024884_137037367	Pig.02211.1	Pig.15005	Pig.02211	circRNA	mRNA	1	0.0578947	0.843045	0.000572792	0.0757712	mir-423:ssc-miR-423-5p(-0.612691249227|-0.637479086188)	Pig.15005	HEATR3-201	HEAT repeat-containing protein 3 isoform X1 [Sus scrofa]	Pig.02211	SPG21-201	maspardin isoform X1 [Sus scrofa]	0.980172	0.0999771
Chr06_137024884_137037367	MSTRG.17879.1	Pig.15005	MSTRG.17879	circRNA	mRNA	1	0.196555	0.724386	0.00771113	0.128299	Chr12_28849(-0.6901579589|-0.719302673468)	Pig.15005	HEATR3-201	HEAT repeat-containing protein 3 isoform X1 [Sus scrofa]	MSTRG.17879			0.979322	0.270949
Chr06_137024884_137037367	MSTRG.44690.1	Pig.15005	MSTRG.44690	circRNA	mRNA	3	0.000561479	0.837243	0.000679762	0.0767553	ChrX_42092(-0.894388375309|-0.738993185884);Chr03_8533(-0.845091378245|-0.643066185793);Chr07_20261(-0.957770228677|-0.749651741449)	Pig.15005	HEATR3-201	HEAT repeat-containing protein 3 isoform X1 [Sus scrofa]	MSTRG.44690			0.998275	0.19416
Chr06_137024884_137037367	Pig.18822.1	Pig.15005	Pig.18822	circRNA	mRNA	1	0.109663	0.72537	0.00758833	0.127324	Chr12_28849(-0.6901579589|-0.685314685315)	Pig.15005	HEATR3-201	HEAT repeat-containing protein 3 isoform X1 [Sus scrofa]	Pig.18822	CTC1	LOW QUALITY PROTEIN: CST complex subunit CTC1 [Sus scrofa]	0.996479	0.246445
Chr06_137024884_137037367	Pig.07708.1	Pig.15005	Pig.07708	circRNA	mRNA	1	0.0578947	0.767625	0.00355762	0.103583	Chr12_28849(-0.6901579589|-0.692307692308)	Pig.15005	HEATR3-201	HEAT repeat-containing protein 3 isoform X1 [Sus scrofa]	Pig.07708	PDE1B-201	calcium/calmodulin-dependent 3',5'-cyclic nucleotide phosphodiesterase 1B isoform X1 [Sus scrofa]	0.998445	0.212614
Chr06_137024884_137037367	Pig.12620.1	Pig.15005	Pig.12620	circRNA	mRNA	1	0.109663	0.705477	0.0103725	0.139892	mir-423:ssc-miR-423-5p(-0.612691249227|-0.917689673523)	Pig.15005	HEATR3-201	HEAT repeat-containing protein 3 isoform X1 [Sus scrofa]	Pig.12620	FAAH-201	fatty-acid amide hydrolase 1 [Sus scrofa]	0.800704	0.249363
Chr06_137024884_137037367	Pig.18243.1	Pig.15005	Pig.18243	circRNA	mRNA	1	0.155745	0.649238	0.022339	0.180107	Chr07_20261(-0.957770228677|-0.655992204061)	Pig.15005	HEATR3-201	HEAT repeat-containing protein 3 isoform X1 [Sus scrofa]	Pig.18243	DHX57-203	putative ATP-dependent RNA helicase TDRD9 isoform X2 [Sus scrofa]	0.812997	0.552712
Chr06_137024884_137037367	Pig.15616.1	Pig.15005	Pig.15616	circRNA	mRNA	1	0.0578947	0.788752	0.00229539	0.0938036	Chr12_28849(-0.6901579589|-0.776223776224)	Pig.15005	HEATR3-201	HEAT repeat-containing protein 3 isoform X1 [Sus scrofa]	Pig.15616	SNX17-201	PREDICTED: sorting nexin-17 isoform X1 [Trichechus manatus latirostris]	0.941307	0.234138
Chr06_137024884_137037367	MSTRG.34889.1	Pig.15005	MSTRG.34889	circRNA	mRNA	1	0.0578947	0.664315	0.0184576	0.168318	Chr11_26361(-0.669030674444|-0.652635596415)	Pig.15005	HEATR3-201	HEAT repeat-containing protein 3 isoform X1 [Sus scrofa]	MSTRG.34889			0.987595	0.259999
Chr06_137024884_137037367	Pig.09123.1	Pig.15005	Pig.09123	circRNA	mRNA	2	0.00874971	0.795794	0.00196229	0.0924511	Chr07_20261(-0.957770228677|-0.671328671329);ChrX_42092(-0.894388375309|-0.65034965035)	Pig.15005	HEATR3-201	HEAT repeat-containing protein 3 isoform X1 [Sus scrofa]	Pig.09123	AP4M1-201	AP-4 complex subunit mu-1 isoform X2 [Sus scrofa]	0.972063	0.122154
Chr06_137024884_137037367	Pig.13201.1	Pig.15005	Pig.13201	circRNA	mRNA	2	0.00874971	0.774667	0.00308965	0.100625	ChrX_42092(-0.894388375309|-0.587412587413);Chr07_20261(-0.957770228677|-0.706293706294)	Pig.15005	HEATR3-201	HEAT repeat-containing protein 3 isoform X1 [Sus scrofa]	Pig.13201	NCAPH-201	condensin complex subunit 2 isoform X2 [Sus scrofa]	0.967123	0.189112
Chr06_137024884_137037367	Pig.12644.1	Pig.15005	Pig.12644	circRNA	mRNA	1	0.0578947	0.873261	0.000207389	0.0630114	Chr12_28849(-0.6901579589|-0.804195804196)	Pig.15005	HEATR3-201	HEAT repeat-containing protein 3 isoform X1 [Sus scrofa]	Pig.12644	UROD-201	uroporphyrinogen decarboxylase [Sus scrofa]	0.923688	0.133372
Chr06_137024884_137037367	Pig.19820.1	Pig.15005	Pig.19820	circRNA	mRNA	3	0.000146643	0.86573	0.000273149	0.0636259	ChrX_42092(-0.894388375309|-0.726320260526);Chr03_8533(-0.845091378245|-0.67017956406);Chr07_20261(-0.957770228677|-0.828075272871)	Pig.15005	HEATR3-201	HEAT repeat-containing protein 3 isoform X1 [Sus scrofa]	Pig.19820	CBX2-201	chromobox protein homolog 2 isoform X1 [Sus scrofa]	0.998988	0.229754
Chr06_137024884_137037367	Pig.18042.1	Pig.15005	Pig.18042	circRNA	mRNA	1	0.109663	0.591564	0.0427573	0.223159	Chr12_28849(-0.6901579589|-0.643356643357)	Pig.15005	HEATR3-201	HEAT repeat-containing protein 3 isoform X1 [Sus scrofa]	Pig.18042	TREX2-201	three prime repair exonuclease 2 [Sus scrofa]	0.964904	0.325239
Chr06_137024884_137037367	MSTRG.20872.1	Pig.15005	MSTRG.20872	circRNA	mRNA	2	0.00874971	0.767625	0.00355762	0.103583	ChrX_42092(-0.894388375309|-0.594405594406);Chr07_20261(-0.957770228677|-0.636363636364)	Pig.15005	HEATR3-201	HEAT repeat-containing protein 3 isoform X1 [Sus scrofa]	MSTRG.20872			0.959375	0.0830985
Chr06_137024884_137037367	Pig.09306.1	Pig.15005	Pig.09306	circRNA	mRNA	1	0.155745	0.807771	0.00148212	0.0892184	Chr12_28849(-0.6901579589|-0.858144923714)	Pig.15005	HEATR3-201	HEAT repeat-containing protein 3 isoform X1 [Sus scrofa]	Pig.09306	PTK7-201	inactive tyrosine-protein kinase 7 [Sus scrofa]	0.891503	0.227698
Chr06_137024884_137037367	Pig.01857.1	Pig.15005	Pig.01857	circRNA	mRNA	1	0.0578947	0.739455	0.00598623	0.119527	Chr03_9544(-0.633818533684|-0.832167832168)	Pig.15005	HEATR3-201	HEAT repeat-containing protein 3 isoform X1 [Sus scrofa]	Pig.01857	SRPX-204	sushi repeat-containing protein SRPX isoform X1 [Sus scrofa]	0.864699	0.245157
Chr06_137024884_137037367	Pig.16166.1	Pig.15005	Pig.16166	circRNA	mRNA	2	0.0501986	0.647903	0.0227091	0.18051	ChrX_42092(-0.894388375309|-0.657342657343);Chr03_8533(-0.845091378245|-0.629370629371)	Pig.15005	HEATR3-201	HEAT repeat-containing protein 3 isoform X1 [Sus scrofa]	Pig.16166	PRX-201	LOW QUALITY PROTEIN: periaxin [Sus scrofa]	0.977629	0.419288
Chr06_137024884_137037367	Pig.03052.1	Pig.15005	Pig.03052	circRNA	mRNA	1	0.155745	0.788752	0.00229539	0.0938036	Chr03_9544(-0.633818533684|-0.839160839161)	Pig.15005	HEATR3-201	HEAT repeat-containing protein 3 isoform X1 [Sus scrofa]	Pig.03052	MTMR9	myotubularin-related protein 9 [Sus scrofa]	0.860594	0.178136
Chr06_137024884_137037367	MSTRG.15722.1	Pig.15005	MSTRG.15722	circRNA	mRNA	3	0.00134332	0.76897	0.0034643	0.103583	Chr07_20261(-0.957770228677|-0.70402910068);Chr03_8533(-0.845091378245|-0.721542262388);ChrX_42092(-0.894388375309|-0.714536997705)	Pig.15005	HEATR3-201	HEAT repeat-containing protein 3 isoform X1 [Sus scrofa]	MSTRG.15722			0.998184	0.332695
Chr06_137024884_137037367	MSTRG.12911.1	Pig.15005	MSTRG.12911	circRNA	mRNA	1	0.0578947	0.739455	0.00598623	0.119527	Chr12_28094(-0.835990537728|-0.633976453846)	Pig.15005	HEATR3-201	HEAT repeat-containing protein 3 isoform X1 [Sus scrofa]	MSTRG.12911			0.862572	0.245887
Chr06_137024884_137037367	Pig.20477.1	Pig.15005	Pig.20477	circRNA	mRNA	1	0.109663	0.711285	0.00949192	0.134875	mir-423:ssc-miR-423-5p(-0.612691249227|-0.706293706294)	Pig.15005	HEATR3-201	HEAT repeat-containing protein 3 isoform X1 [Sus scrofa]	Pig.20477	VRK3-202	inactive serine/threonine-protein kinase VRK3 [Sus scrofa]	0.929034	0.213424
Chr06_137024884_137037367	Pig.15852.1	Pig.15005	Pig.15852	circRNA	mRNA	1	0.109663	0.733696	0.00660693	0.123576	Chr12_28849(-0.6901579589|-0.812610703272)	Pig.15005	HEATR3-201	HEAT repeat-containing protein 3 isoform X1 [Sus scrofa]	Pig.15852	UBA7-201	ubiquitin-like modifier-activating enzyme 7 [Sus scrofa]	0.918515	0.32382
Chr06_137024884_137037367	MSTRG.36474.1	Pig.15005	MSTRG.36474	circRNA	mRNA	1	0.155745	0.746497	0.00528802	0.119527	Chr07_20261(-0.957770228677|-0.629370629371)	Pig.15005	HEATR3-201	HEAT repeat-containing protein 3 isoform X1 [Sus scrofa]	MSTRG.36474			0.793087	0.103363
Chr06_137024884_137037367	Pig.17713.1	Pig.15005	Pig.17713	circRNA	mRNA	1	0.232484	0.876331	0.000184451	0.0630114	Chr12_28849(-0.6901579589|-0.659653183473)	Pig.15005	HEATR3-201	HEAT repeat-containing protein 3 isoform X1 [Sus scrofa]	Pig.17713	FBN3-203	fibrillin-3 [Sus scrofa]	0.977401	0.102142
Chr06_137024884_137037367	MSTRG.30061.2	Pig.15005	MSTRG.30061	circRNA	mRNA	2	0.0264187	0.860682	0.000325598	0.0703934	Chr11_26361(-0.669030674444|-0.676008041947);Chr12_28849(-0.6901579589|-0.595447498088)	Pig.15005	HEATR3-201	HEAT repeat-containing protein 3 isoform X1 [Sus scrofa]	MSTRG.30061			0.997273	0.101054
Chr06_137024884_137037367	Pig.10363.1	Pig.15005	Pig.10363	circRNA	mRNA	1	0.155745	0.774667	0.00308965	0.100625	Chr11_26361(-0.669030674444|-0.622377622378)	Pig.15005	HEATR3-201	HEAT repeat-containing protein 3 isoform X1 [Sus scrofa]	Pig.10363	CORO7-PAM16	coronin-7 isoform X1 [Sus scrofa]	0.963874	0.158798
Chr06_137024884_137037367	Pig.22659.1	Pig.15005	Pig.22659	circRNA	mRNA	3	0.000146643	0.831007	0.000811316	0.0795415	Chr07_20261(-0.957770228677|-0.79020979021);Chr03_8533(-0.845091378245|-0.657342657343);ChrX_42092(-0.894388375309|-0.741258741259)	Pig.15005	HEATR3-201	HEAT repeat-containing protein 3 isoform X1 [Sus scrofa]	Pig.22659	GALK1-202	galactokinase [Sus scrofa]	0.998782	0.276215
Chr06_137024884_137037367	Pig.18928.1	Pig.15005	Pig.18928	circRNA	mRNA	1	0.0578947	0.802837	0.00166751	0.0904396	mir-664:ssc-miR-664-5p(-0.661988246292|-0.629370629371)	Pig.15005	HEATR3-201	HEAT repeat-containing protein 3 isoform X1 [Sus scrofa]	Pig.18928	ISG12(A)-202	uncharacterized protein LOC100153902 [Sus scrofa]	0.974742	0.139776
Chr06_137024884_137037367	Pig.03444.1	Pig.15005	Pig.03444	circRNA	mRNA	1	0.109663	0.744278	0.005501	0.119527	Chr12_28849(-0.6901579589|-0.633976453846)	Pig.15005	HEATR3-201	HEAT repeat-containing protein 3 isoform X1 [Sus scrofa]	Pig.03444	ATP7A-203	LOW QUALITY PROTEIN: copper-transporting ATPase 2 [Sus scrofa]	0.957571	0.196189
Chr06_137024884_137037367	Pig.15342.1	Pig.15005	Pig.15342	circRNA	mRNA	1	0.0578947	0.719587	0.00833158	0.129569	Chr03_9544(-0.633818533684|-0.816113335614)	Pig.15005	HEATR3-201	HEAT repeat-containing protein 3 isoform X1 [Sus scrofa]	Pig.15342	TNKS1BP1	182 kDa tankyrase-1-binding protein-like [Sus scrofa]	0.874274	0.26696
Chr06_137024884_137037367	Pig.09158.1	Pig.15005	Pig.09158	circRNA	mRNA	1	0.155745	0.774667	0.00308965	0.100625	Chr12_28849(-0.6901579589|-0.65034965035)	Pig.15005	HEATR3-201	HEAT repeat-containing protein 3 isoform X1 [Sus scrofa]	Pig.09158	SLC12A9-201	solute carrier family 12 member 9 isoform X1 [Sus scrofa]	0.970304	0.181956
Chr06_137024884_137037367	Pig.11984.1	Pig.15005	Pig.11984	circRNA	mRNA	3	0.000561479	0.920648	2.16633e-05	0.0331603	Chr07_20261(-0.957770228677|-0.879160717765);Chr03_8533(-0.845091378245|-0.826621232639);ChrX_42092(-0.894388375309|-0.830123864981)	Pig.15005	HEATR3-201	HEAT repeat-containing protein 3 isoform X1 [Sus scrofa]	Pig.11984	HTR4-204	5-hydroxytryptamine receptor 4 [Sus scrofa]	0.999956	0.245189
Chr06_137024884_137037367	Pig.12139.1	Pig.15005	Pig.12139	circRNA	mRNA	3	0.000146643	0.595745	0.040948	0.221137	ChrX_42092(-0.894388375309|-0.647903389988);Chr03_8533(-0.845091378245|-0.591563964771);Chr07_20261(-0.957770228677|-0.598606392923)	Pig.15005	HEATR3-201	HEAT repeat-containing protein 3 isoform X1 [Sus scrofa]	Pig.12139	KIF14-201	LOW QUALITY PROTEIN: kinesin-like protein KIF14 [Sus scrofa]	0.992711	0.473288
Chr06_137024884_137037367	Pig.01321.1	Pig.15005	Pig.01321	circRNA	mRNA	1	0.155745	0.874792	0.000195688	0.0630114	mir-423:ssc-miR-423-5p(-0.612691249227|-0.651489615555)	Pig.15005	HEATR3-201	HEAT repeat-containing protein 3 isoform X1 [Sus scrofa]	Pig.01321	KCP-201	kielin/chordin-like protein isoform X1 [Sus scrofa]	0.969309	0.0815255
Chr06_137024884_137037367	MSTRG.42756.1	Pig.15005	MSTRG.42756	circRNA	mRNA	1	0.155745	0.726642	0.00743182	0.127324	Chr07_20261(-0.957770228677|-0.637479086188)	Pig.15005	HEATR3-201	HEAT repeat-containing protein 3 isoform X1 [Sus scrofa]	MSTRG.42756			0.799222	0.20265
Chr06_137024884_137037367	Pig.16377.1	Pig.15005	Pig.16377	circRNA	mRNA	1	0.0578947	0.704243	0.0105672	0.139892	Chr12_28849(-0.6901579589|-0.692307692308)	Pig.15005	HEATR3-201	HEAT repeat-containing protein 3 isoform X1 [Sus scrofa]	Pig.16377	LZTS2-201	PREDICTED: leucine zipper putative tumor suppressor 2 isoform X1 [Equus caballus]	0.998445	0.270609
Chr06_137024884_137037367	Pig.11814.1	Pig.15005	Pig.11814	circRNA	mRNA	1	0.109663	0.711285	0.00949192	0.134875	Chr03_9544(-0.633818533684|-0.867132867133)	Pig.15005	HEATR3-201	HEAT repeat-containing protein 3 isoform X1 [Sus scrofa]	Pig.11814	NOS2-203	nitric oxide synthase, inducible isoform X1 [Sus scrofa]	0.844556	0.291612
Chr06_137024884_137037367	Pig.19885.1	Pig.15005	Pig.19885	circRNA	mRNA	1	0.0578947	0.816922	0.00118061	0.0854743	mir-423:ssc-miR-423-5p(-0.612691249227|-0.643356643357)	Pig.15005	HEATR3-201	HEAT repeat-containing protein 3 isoform X1 [Sus scrofa]	Pig.19885	CYC1-201	cytochrome c1, heme protein, mitochondrial [Sus scrofa]	0.975586	0.118225
Chr06_137024884_137037367	Pig.20300.1	Pig.15005	Pig.20300	circRNA	mRNA	3	0.00257047	0.820605	0.00107357	0.0854743	Chr03_8533(-0.845091378245|-0.617307952992);ChrX_42092(-0.894388375309|-0.691384907351);Chr07_20261(-0.957770228677|-0.737242069573)	Pig.15005	HEATR3-201	HEAT repeat-containing protein 3 isoform X1 [Sus scrofa]	Pig.20300	CACNA1E-201	PREDICTED: voltage-dependent P/Q-type calcium channel subunit alpha-1A isoform X12 [Pan troglodytes]	0.997307	0.178638
Chr06_137024884_137037367	Pig.12641.1	Pig.15005	Pig.12641	circRNA	mRNA	1	0.155745	0.760582	0.00407753	0.107613	Chr03_9544(-0.633818533684|-0.839160839161)	Pig.15005	HEATR3-201	HEAT repeat-containing protein 3 isoform X1 [Sus scrofa]	Pig.12641	MUTYH	adenine DNA glycosylase isoform X1 [Sus scrofa]	0.860594	0.216928
Chr06_137024884_137037367	Pig.09091.1	Pig.15005	Pig.09091	circRNA	mRNA	1	0.0578947	0.78171	0.00267007	0.0972726	Chr11_26361(-0.669030674444|-0.72027972028)	Pig.15005	HEATR3-201	HEAT repeat-containing protein 3 isoform X1 [Sus scrofa]	Pig.09091	Atp5j2	ATP5J2, partial [Cervus elaphus hippelaphus]	0.963112	0.200178
Chr06_137024884_137037367	MSTRG.21693.1	Pig.15005	MSTRG.21693	circRNA	mRNA	4	3.0187e-05	0.765443	0.00371297	0.10581	ChrX_42092(-0.894388375309|-0.735552791755);Chr03_8533(-0.845091378245|-0.823118600298);Chr07_20261(-0.957770228677|-0.714536997705);Chr12_28094(-0.835990537728|-0.652631578947)	Pig.15005	HEATR3-201	HEAT repeat-containing protein 3 isoform X1 [Sus scrofa]	MSTRG.21693			0.999808	0.386228
Chr06_137024884_137037367	MSTRG.10050.1	Pig.15005	MSTRG.10050	circRNA	mRNA	1	0.109663	0.790135	0.00222682	0.0938036	Chr12_28849(-0.6901579589|-0.718039630047)	Pig.15005	HEATR3-201	HEAT repeat-containing protein 3 isoform X1 [Sus scrofa]	MSTRG.10050			0.9802	0.205278
Chr06_137024884_137037367	Pig.20469.1	Pig.15005	Pig.20469	circRNA	mRNA	2	0.00306321	0.711285	0.00949192	0.134875	ChrX_42092(-0.894388375309|-0.643356643357);Chr07_20261(-0.957770228677|-0.629370629371)	Pig.15005	HEATR3-201	HEAT repeat-containing protein 3 isoform X1 [Sus scrofa]	Pig.20469	POLD1-201	DNA polymerase delta catalytic subunit isoform X2 [Sus scrofa]	0.965269	0.270115
Chr06_137024884_137037367	Pig.05789.1	Pig.15005	Pig.05789	circRNA	mRNA	1	0.0578947	0.700886	0.0111105	0.14423	Chr12_28849(-0.6901579589|-0.622152759927)	Pig.15005	HEATR3-201	HEAT repeat-containing protein 3 isoform X1 [Sus scrofa]	Pig.05789	EMID1-208	EMI domain-containing protein 1 isoform X1 [Sus scrofa]	0.948179	0.221665
Chr15_57751128_57770746	Pig.17492.1	Pig.02634	Pig.17492	circRNA	mRNA	1	0.246765	0.669003	0.0173586	0.164599	Chr02_7181(-0.658494880238|-0.731578947368)	Pig.02634	HERC2-201	E3 ubiquitin-protein ligase HERC2 isoform X1 [Sus scrofa]	Pig.17492	TUB-201	tubby protein homolog isoform X2 [Sus scrofa]	0.947424	0.304027
Chr15_57751128_57770746	Pig.20592.1	Pig.02634	Pig.20592	circRNA	mRNA	1	0.100251	0.657343	0.0201855	0.173534	mir-361:ssc-miR-361-3p(-0.629370629371|-0.643356643357)	Pig.02634	HERC2-201	E3 ubiquitin-protein ligase HERC2 isoform X1 [Sus scrofa]	Pig.20592	MFSD3-201	major facilitator superfamily domain-containing protein 3 isoform X2 [Sus scrofa]	0.989011	0.233033
Chr15_57751128_57770746	Pig.22141.1	Pig.02634	Pig.22141	circRNA	mRNA	1	0.0526316	0.658495	0.0198921	0.173534	mir-504:ssc-miR-504(-0.692307692308|-0.647986983213)	Pig.02634	HERC2-201	E3 ubiquitin-protein ligase HERC2 isoform X1 [Sus scrofa]	Pig.22141	DGKQ-202	diacylglycerol kinase theta isoform X1 [Sus scrofa]	0.966932	0.276608
Chr15_57751128_57770746	Pig.08862.1	Pig.02634	Pig.08862	circRNA	mRNA	1	0.100251	0.647987	0.0226858	0.18051	Chr03_7531(-0.755244755245|-0.718039630047)	Pig.02634	HERC2-201	E3 ubiquitin-protein ligase HERC2 isoform X1 [Sus scrofa]	Pig.08862	ADAMTSL3-202	ADAMTS-like protein 3 isoform X2 [Sus scrofa]	0.974747	0.416304
Chr15_57751128_57770746	MSTRG.30891.2	Pig.02634	MSTRG.30891	circRNA	mRNA	2	0.0538644	0.657343	0.0201855	0.173534	mir-361:ssc-miR-361-3p(-0.629370629371|-0.811188811189);mir-874:ssc-miR-874(-0.587412587413|-0.783216783217)	Pig.02634	HERC2-201	E3 ubiquitin-protein ligase HERC2 isoform X1 [Sus scrofa]	MSTRG.30891			0.981831	0.299793
Chr15_57751128_57770746	Pig.14953.1	Pig.02634	Pig.14953	circRNA	mRNA	1	0.0526316	0.832168	0.000785442	0.0795415	ssc-miR-7137-3p(-0.72027972028|-0.629370629371)	Pig.02634	HERC2-201	E3 ubiquitin-protein ligase HERC2 isoform X1 [Sus scrofa]	Pig.14953	NEURL2-201	neuralized-like protein 2 [Sus scrofa]	0.932642	0.129387
Chr15_57751128_57770746	Pig.22620.1	Pig.02634	Pig.22620	circRNA	mRNA	2	0.0422451	0.643357	0.0240032	0.183841	mir-504:ssc-miR-504(-0.692307692308|-0.601398601399);Chr12_28094(-0.630473821505|-0.72504489473)	Pig.02634	HERC2-201	E3 ubiquitin-protein ligase HERC2 isoform X1 [Sus scrofa]	Pig.22620	RGS12-201	LOW QUALITY PROTEIN: regulator of G-protein signaling 12 [Sus scrofa]	0.995097	0.272295
Chr15_57751128_57770746	Pig.18173.1	Pig.02634	Pig.18173	circRNA	mRNA	1	0.0526316	0.706294	0.0102452	0.139666	Chr02_7181(-0.658494880238|-0.619965924479)	Pig.02634	HERC2-201	E3 ubiquitin-protein ligase HERC2 isoform X1 [Sus scrofa]	Pig.18173	SLC27A3-201	long-chain fatty acid transport protein 3 isoform X1 [Sus scrofa]	0.969863	0.201553
Chr15_57751128_57770746	Pig.02404.1	Pig.02634	Pig.02404	circRNA	mRNA	1	0.143177	0.72028	0.00823977	0.128514	Chr02_7181(-0.658494880238|-0.588442233404)	Pig.02634	HERC2-201	E3 ubiquitin-protein ligase HERC2 isoform X1 [Sus scrofa]	Pig.02404	NRK-202	nik-related protein kinase isoform X1 [Sus scrofa]	0.94382	0.173367
Chr15_57751128_57770746	Pig.19937.1	Pig.02634	Pig.19937	circRNA	mRNA	1	0.100251	0.727273	0.00735503	0.127324	Chr02_7181(-0.658494880238|-0.735552791755)	Pig.02634	HERC2-201	E3 ubiquitin-protein ligase HERC2 isoform X1 [Sus scrofa]	Pig.19937	INTS5-201	LOW QUALITY PROTEIN: integrator complex subunit 5 [Sus scrofa]	0.944724	0.250831
Chr15_57751128_57770746	Pig.16028.1	Pig.02634	Pig.16028	circRNA	mRNA	2	0.0137818	0.578951	0.0485584	0.23291	mir-504:ssc-miR-504(-0.692307692308|-0.63158283524);Chr02_7181(-0.658494880238|-0.688929007709)	Pig.02634	HERC2-201	E3 ubiquitin-protein ligase HERC2 isoform X1 [Sus scrofa]	Pig.16028	WDR62-201	WD repeat-containing protein 62 [Sus scrofa]	0.998693	0.337466
Chr15_57751128_57770746	Pig.20585.1	Pig.02634	Pig.20585	circRNA	mRNA	1	0.143177	0.616463	0.032776	0.205087	Chr02_7181(-0.658494880238|-0.585964912281)	Pig.02634	HERC2-201	E3 ubiquitin-protein ligase HERC2 isoform X1 [Sus scrofa]	Pig.20585	TONSL-201	tonsoku-like protein isoform X1 [Sus scrofa]	0.941718	0.238322
Chr15_57751128_57770746	Pig.07973.1	Pig.02634	Pig.07973	circRNA	mRNA	2	0.00250627	0.699301	0.0113742	0.14423	Chr03_7531(-0.755244755245|-0.699300699301);Chr02_7181(-0.658494880238|-0.651489615555)	Pig.02634	HERC2-201	E3 ubiquitin-protein ligase HERC2 isoform X1 [Sus scrofa]	Pig.07973	TMEM94-201	transmembrane protein 94 isoform X6 [Sus scrofa]	0.999246	0.279939
Chr15_57751128_57770746	Pig.12266.1	Pig.02634	Pig.12266	circRNA	mRNA	1	0.100251	0.72028	0.00823977	0.128514	Chr02_7181(-0.658494880238|-0.714536997705)	Pig.02634	HERC2-201	E3 ubiquitin-protein ligase HERC2 isoform X1 [Sus scrofa]	Pig.12266	PLIN3-201	perilipin-5 [Sus scrofa]	0.959184	0.245906
Chr15_57751128_57770746	Pig.07672.1	Pig.02634	Pig.07672	circRNA	mRNA	1	0.216153	0.644484	0.0236773	0.183841	ssc-miR-7137-3p(-0.72027972028|-0.872155453081)	Pig.02634	HERC2-201	E3 ubiquitin-protein ligase HERC2 isoform X1 [Sus scrofa]	Pig.07672	ESPL1-201	LOW QUALITY PROTEIN: separin [Sus scrofa]	0.904627	0.596488
Chr15_57751128_57770746	Pig.18656.1	Pig.02634	Pig.18656	circRNA	mRNA	1	0.143177	0.734266	0.00654349	0.123576	mir-504:ssc-miR-504(-0.692307692308|-0.748251748252)	Pig.02634	HERC2-201	E3 ubiquitin-protein ligase HERC2 isoform X1 [Sus scrofa]	Pig.18656	ARRB2-201	beta-arrestin-2 isoform X3 [Sus scrofa]	0.961165	0.282552
Chr15_57751128_57770746	Pig.21446.1	Pig.02634	Pig.21446	circRNA	mRNA	1	0.0526316	0.622378	0.0306759	0.199692	Chr12_28094(-0.630473821505|-0.86865282074)	Pig.02634	HERC2-201	E3 ubiquitin-protein ligase HERC2 isoform X1 [Sus scrofa]	Pig.21446	CYBA-201	cytochrome b-245 light chain isoform X1 [Sus scrofa]	0.841121	0.428087
Chr15_57751128_57770746	Pig.02564.1	Pig.02634	Pig.02564	circRNA	mRNA	1	0.0526316	0.608392	0.035806	0.209995	mir-361:ssc-miR-361-3p(-0.629370629371|-0.594405594406)	Pig.02634	HERC2-201	E3 ubiquitin-protein ligase HERC2 isoform X1 [Sus scrofa]	Pig.02564	MXD3-201	max dimerization protein 3 [Sus scrofa]	0.971429	0.23348
Chr15_57751128_57770746	Pig.06870.1	Pig.02634	Pig.06870	circRNA	mRNA	1	0.100251	0.727273	0.00735503	0.127324	ssc-miR-7137-3p(-0.72027972028|-0.608391608392)	Pig.02634	HERC2-201	E3 ubiquitin-protein ligase HERC2 isoform X1 [Sus scrofa]	Pig.06870	TECTA-201	alpha-tectorin isoform X1 [Sus scrofa]	0.915789	0.202217
Chr15_57751128_57770746	MSTRG.21578.1	Pig.02634	MSTRG.21578	circRNA	mRNA	2	0.0219816	0.643357	0.0240032	0.183841	mir-361:ssc-miR-361-3p(-0.629370629371|-0.776223776224);mir-874:ssc-miR-874(-0.587412587413|-0.657342657343)	Pig.02634	HERC2-201	E3 ubiquitin-protein ligase HERC2 isoform X1 [Sus scrofa]	MSTRG.21578			0.992964	0.274466
Chr15_57751128_57770746	Pig.18196.1	Pig.02634	Pig.18196	circRNA	mRNA	1	0.246765	0.806497	0.00152838	0.0904396	Chr02_7181(-0.658494880238|-0.619279827885)	Pig.02634	HERC2-201	E3 ubiquitin-protein ligase HERC2 isoform X1 [Sus scrofa]	Pig.18196	CFAP46-201	cilia- and flagella-associated protein 46 isoform X3 [Sus scrofa]	0.96931	0.131765
Chr15_57751128_57770746	Pig.12624.1	Pig.02634	Pig.12624	circRNA	mRNA	1	0.100251	0.669003	0.0173586	0.164599	ssc-miR-7137-3p(-0.72027972028|-0.654992247896)	Pig.02634	HERC2-201	E3 ubiquitin-protein ligase HERC2 isoform X1 [Sus scrofa]	Pig.12624	RAD54L-202	DNA repair and recombination protein RAD54-like [Sus scrofa]	0.952528	0.292743
Chr15_57751128_57770746	Pig.11482.1	Pig.02634	Pig.11482	circRNA	mRNA	1	0.0526316	0.72028	0.00823977	0.128514	mir-504:ssc-miR-504(-0.692307692308|-0.664335664336)	Pig.02634	HERC2-201	E3 ubiquitin-protein ligase HERC2 isoform X1 [Sus scrofa]	Pig.11482	SMYD5-201	homeobox protein notochord [Sus scrofa]	0.979381	0.23756
Chr15_57751128_57770746	Pig.02355.1	Pig.02634	Pig.02355	circRNA	mRNA	1	0.100251	0.604578	0.0373051	0.21527	mir-504:ssc-miR-504(-0.692307692308|-0.579972911797)	Pig.02634	HERC2-201	E3 ubiquitin-protein ligase HERC2 isoform X1 [Sus scrofa]	Pig.02355	ARMCX4-201	armadillo repeat-containing X-linked protein 4 [Sus scrofa]	0.911706	0.259149
Chr15_57751128_57770746	Pig.13071.1	Pig.02634	Pig.13071	circRNA	mRNA	1	0.100251	0.695321	0.0120566	0.148606	ssc-miR-7137-3p(-0.72027972028|-0.702452338586)	Pig.02634	HERC2-201	E3 ubiquitin-protein ligase HERC2 isoform X1 [Sus scrofa]	Pig.13071	COL2A1-201	LOW QUALITY PROTEIN: collagen alpha-1(II) chain [Sus scrofa]	0.98747	0.311783
Chr15_57751128_57770746	Pig.22014.1	Pig.02634	Pig.22014	circRNA	mRNA	1	0.0526316	0.630474	0.0279603	0.195771	mir-361:ssc-miR-361-3p(-0.629370629371|-0.64098171853)	Pig.02634	HERC2-201	E3 ubiquitin-protein ligase HERC2 isoform X1 [Sus scrofa]	Pig.22014	RABL2B	rab-like protein 2A isoform X2 [Sus scrofa]	0.99086	0.249804
Chr15_57751128_57770746	Pig.08877.1	Pig.02634	Pig.08877	circRNA	mRNA	1	0.0526316	0.704243	0.0105672	0.139892	Chr13_30396(-0.804195804196|-0.781709524876)	Pig.02634	HERC2-201	E3 ubiquitin-protein ligase HERC2 isoform X1 [Sus scrofa]	Pig.08877	TSHR-204	thyrotropin receptor precursor [Sus scrofa]	0.985821	0.500301
Chr15_57751128_57770746	Pig.15851.1	Pig.02634	Pig.15851	circRNA	mRNA	1	0.100251	0.71804	0.00853932	0.130155	mir-874:ssc-miR-874(-0.587412587413|-0.707531733022)	Pig.02634	HERC2-201	E3 ubiquitin-protein ligase HERC2 isoform X1 [Sus scrofa]	Pig.15851	TRAIP-201	E3 ubiquitin-protein ligase TRAIP isoform X1 [Sus scrofa]	0.90724	0.189237
Chr15_57751128_57770746	Pig.14895.1	Pig.02634	Pig.14895	circRNA	mRNA	1	0.0526316	0.797203	0.00190037	0.0915734	ssc-miR-7137-3p(-0.72027972028|-0.699300699301)	Pig.02634	HERC2-201	E3 ubiquitin-protein ligase HERC2 isoform X1 [Sus scrofa]	Pig.14895	PRXL2B-201	prostamide/prostaglandin F synthase [Sus scrofa]	0.985222	0.205285
Chr15_57751128_57770746	Pig.08095.1	Pig.02634	Pig.08095	circRNA	mRNA	1	0.0526316	0.86014	0.000331668	0.0703934	Chr02_7181(-0.658494880238|-0.665500144921)	Pig.02634	HERC2-201	E3 ubiquitin-protein ligase HERC2 isoform X1 [Sus scrofa]	Pig.08095	CTHRC1-202	collagen triple helix repeat-containing protein 1 [Sus scrofa]	0.994709	0.109044
Chr15_57751128_57770746	MSTRG.7156.1	Pig.02634	MSTRG.7156	circRNA	mRNA	1	0.216153	0.601399	0.0385885	0.216593	mir-504:ssc-miR-504(-0.692307692308|-0.643356643357)	Pig.02634	HERC2-201	E3 ubiquitin-protein ligase HERC2 isoform X1 [Sus scrofa]	MSTRG.7156			0.963351	0.319016
Chr15_57751128_57770746	Pig.14514.1	Pig.02634	Pig.14514	circRNA	mRNA	1	0.0526316	0.697024	0.011761	0.145686	Chr13_30396(-0.804195804196|-0.742558056439)	Pig.02634	HERC2-201	E3 ubiquitin-protein ligase HERC2 isoform X1 [Sus scrofa]	Pig.14514	FAAP24-201	Fanconi anemia core complex-associated protein 24 [Sus scrofa]	0.96015	0.446174
Chr15_57751128_57770746	Pig.09185.1	Pig.02634	Pig.09185	circRNA	mRNA	1	0.0526316	0.58042	0.047856	0.23044	Chr02_7181(-0.658494880238|-0.612960659796)	Pig.02634	HERC2-201	E3 ubiquitin-protein ligase HERC2 isoform X1 [Sus scrofa]	Pig.09185	ORAI2-201	PREDICTED: protein orai-2 [Lipotes vexillifer]	0.964187	0.283111
Chr15_57751128_57770746	Pig.04569.1	Pig.02634	Pig.04569	circRNA	mRNA	1	0.0526316	0.690019	0.0130122	0.149599	Chr02_7181(-0.658494880238|-0.677192982456)	Pig.02634	HERC2-201	E3 ubiquitin-protein ligase HERC2 isoform X1 [Sus scrofa]	Pig.04569	C1QTNF2-201	PREDICTED: complement C1q tumor necrosis factor-related protein 2 [Bos taurus]	0.986001	0.249228
Chr15_57751128_57770746	Pig.07425.1	Pig.02634	Pig.07425	circRNA	mRNA	1	0.100251	0.643357	0.0240032	0.183841	ssc-miR-7137-3p(-0.72027972028|-0.58041958042)	Pig.02634	HERC2-201	E3 ubiquitin-protein ligase HERC2 isoform X1 [Sus scrofa]	Pig.07425	MYBL2-201	myb-related protein B [Sus scrofa]	0.892473	0.244524
Chr15_57751128_57770746	Pig.12620.1	Pig.02634	Pig.12620	circRNA	mRNA	1	0.100251	0.795098	0.00199349	0.0924511	Chr02_7181(-0.658494880238|-0.79298245614)	Pig.02634	HERC2-201	E3 ubiquitin-protein ligase HERC2 isoform X1 [Sus scrofa]	Pig.12620	FAAH-201	fatty-acid amide hydrolase 1 [Sus scrofa]	0.907344	0.199857
Chr15_57751128_57770746	Pig.03438.1	Pig.02634	Pig.03438	circRNA	mRNA	1	0.0526316	0.58042	0.047856	0.23044	Chr03_7531(-0.755244755245|-0.748251748252)	Pig.02634	HERC2-201	E3 ubiquitin-protein ligase HERC2 isoform X1 [Sus scrofa]	Pig.03438	FAM124A-202	protein FAM124A [Sus scrofa]	0.995349	0.545219
Chr15_57751128_57770746	Pig.07964.1	Pig.02634	Pig.07964	circRNA	mRNA	1	0.100251	0.863163	0.000298922	0.0681478	Chr13_30396(-0.804195804196|-0.754390608759)	Pig.02634	HERC2-201	E3 ubiquitin-protein ligase HERC2 isoform X1 [Sus scrofa]	Pig.07964	MYO16	LOW QUALITY PROTEIN: unconventional myosin-XVI [Sus scrofa]	0.968045	0.205771
Chr15_57751128_57770746	Pig.08043.1	Pig.02634	Pig.08043	circRNA	mRNA	1	0.0526316	0.811189	0.00136332	0.0864374	ssc-miR-7137-3p(-0.72027972028|-0.783216783217)	Pig.02634	HERC2-201	E3 ubiquitin-protein ligase HERC2 isoform X1 [Sus scrofa]	Pig.08043	RGS9-201	regulator of G-protein signaling 9 isoform X1 [Sus scrofa]	0.95814	0.238373
Chr15_57751128_57770746	MSTRG.43551.1	Pig.02634	MSTRG.43551	circRNA	mRNA	1	0.100251	0.706294	0.0102452	0.139666	Chr03_7531(-0.755244755245|-0.699300699301)	Pig.02634	HERC2-201	E3 ubiquitin-protein ligase HERC2 isoform X1 [Sus scrofa]	MSTRG.43551			0.961538	0.32606
Chr15_57751128_57770746	Pig.14753.1	Pig.02634	Pig.14753	circRNA	mRNA	1	0.100251	0.692308	0.012593	0.148606	Chr02_7181(-0.658494880238|-0.732050159414)	Pig.02634	HERC2-201	E3 ubiquitin-protein ligase HERC2 isoform X1 [Sus scrofa]	Pig.14753	VWCE-201	von Willebrand factor C and EGF domain-containing protein isoform X1 [Sus scrofa]	0.947103	0.282211
Chr15_57751128_57770746	Pig.10307.1	Pig.02634	Pig.10307	circRNA	mRNA	1	0.0526316	0.58042	0.047856	0.23044	Chr02_7181(-0.658494880238|-0.66199751258)	Pig.02634	HERC2-201	E3 ubiquitin-protein ligase HERC2 isoform X1 [Sus scrofa]	Pig.10307	CCNF-201	Cyclin-F [Fukomys damarensis]	0.997347	0.324249
Chr15_57751128_57770746	Pig.17713.1	Pig.02634	Pig.17713	circRNA	mRNA	2	0.0219816	0.771935	0.00326529	0.103583	Chr02_7181(-0.658494880238|-0.701231311418);Chr13_30396(-0.804195804196|-0.785969750521)	Pig.02634	HERC2-201	E3 ubiquitin-protein ligase HERC2 isoform X1 [Sus scrofa]	Pig.17713	FBN3-203	fibrillin-3 [Sus scrofa]	0.99944	0.292583
Chr15_57751128_57770746	Pig.23058.1	Pig.02634	Pig.23058	circRNA	mRNA	1	0.143177	0.657343	0.0201855	0.173534	ssc-miR-7137-3p(-0.72027972028|-0.587412587413)	Pig.02634	HERC2-201	E3 ubiquitin-protein ligase HERC2 isoform X1 [Sus scrofa]	Pig.23058	EBF4-201	transcription factor COE4 isoform X5 [Sus scrofa]	0.898396	0.24009
Chr15_57751128_57770746	Pig.10363.1	Pig.02634	Pig.10363	circRNA	mRNA	1	0.143177	0.587413	0.0446093	0.225097	Chr02_7181(-0.658494880238|-0.588442233404)	Pig.02634	HERC2-201	E3 ubiquitin-protein ligase HERC2 isoform X1 [Sus scrofa]	Pig.10363	CORO7-PAM16	coronin-7 isoform X1 [Sus scrofa]	0.94382	0.258854
Chr15_57751128_57770746	Pig.21962.1	Pig.02634	Pig.21962	circRNA	mRNA	1	0.0526316	0.622378	0.0306759	0.199692	Chr02_7181(-0.658494880238|-0.70402910068)	Pig.02634	HERC2-201	E3 ubiquitin-protein ligase HERC2 isoform X1 [Sus scrofa]	Pig.21962	SCUBE1-201	LOW QUALITY PROTEIN: signal peptide, CUB and EGF-like domain-containing protein 1 [Sus scrofa]	0.966581	0.325299
Chr15_57751128_57770746	Pig.08625.1	Pig.02634	Pig.08625	circRNA	mRNA	1	0.181715	0.6386	0.0254134	0.189707	Chr02_7181(-0.658494880238|-0.627417489163)	Pig.02634	HERC2-201	E3 ubiquitin-protein ligase HERC2 isoform X1 [Sus scrofa]	Pig.08625	CROCC-201	LOW QUALITY PROTEIN: rootletin [Sus scrofa]	0.975832	0.253891
Chr15_57751128_57770746	Pig.01670.1	Pig.02634	Pig.01670	circRNA	mRNA	1	0.0526316	0.700526	0.0111699	0.14423	ssc-miR-7137-3p(-0.72027972028|-0.72504489473)	Pig.02634	HERC2-201	E3 ubiquitin-protein ligase HERC2 isoform X1 [Sus scrofa]	Pig.01670	COL11A1-201	LOW QUALITY PROTEIN: collagen alpha-1(XI) chain [Sus scrofa]	0.996703	0.32733
Chr15_57751128_57770746	Pig.07416.1	Pig.02634	Pig.07416	circRNA	mRNA	1	0.0526316	0.802103	0.00169653	0.0904396	ssc-miR-7137-3p(-0.72027972028|-0.658494880238)	Pig.02634	HERC2-201	E3 ubiquitin-protein ligase HERC2 isoform X1 [Sus scrofa]	Pig.07416	EMILIN3-201	EMILIN-3 [Sus scrofa]	0.955189	0.174197
Chr15_57751128_57770746	Pig.20300.1	Pig.02634	Pig.20300	circRNA	mRNA	1	0.246765	0.765462	0.00371159	0.10581	mir-504:ssc-miR-504(-0.692307692308|-0.582033212821)	Pig.02634	HERC2-201	E3 ubiquitin-protein ligase HERC2 isoform X1 [Sus scrofa]	Pig.20300	CACNA1E-201	PREDICTED: voltage-dependent P/Q-type calcium channel subunit alpha-1A isoform X12 [Pan troglodytes]	0.913465	0.147659
Chr15_57751128_57770746	Pig.10482.1	Pig.02634	Pig.10482	circRNA	mRNA	1	0.0526316	0.718975	0.00841326	0.130084	ssc-miR-7137-3p(-0.72027972028|-0.644230107444)	Pig.02634	HERC2-201	E3 ubiquitin-protein ligase HERC2 isoform X1 [Sus scrofa]	Pig.10482	UBAP2L-204	PREDICTED: ubiquitin-associated protein 2-like isoform X4 [Pteropus vampyrus]	0.944266	0.238439
Chr15_57751128_57770746	Pig.11328.1	Pig.02634	Pig.11328	circRNA	mRNA	1	0.0526316	0.783217	0.00258621	0.0962432	Chr02_7181(-0.658494880238|-0.679510674288)	Pig.02634	HERC2-201	E3 ubiquitin-protein ligase HERC2 isoform X1 [Sus scrofa]	Pig.11328	HIST2H2BE-201	PREDICTED: histone H2B type 1-like [Propithecus coquereli]	0.984293	0.175112
Chr15_57751128_57770746	Pig.06349.1	Pig.02634	Pig.06349	circRNA	mRNA	1	0.181715	0.774082	0.00312666	0.10091	Chr13_30396(-0.804195804196|-0.756568585805)	Pig.02634	HERC2-201	E3 ubiquitin-protein ligase HERC2 isoform X1 [Sus scrofa]	Pig.06349	PIK3R2	phosphatidylinositol 3-kinase regulatory subunit beta [Sus scrofa]	0.969485	0.347871
Chr15_57751128_57770746	Pig.17197.1	Pig.02634	Pig.17197	circRNA	mRNA	1	0.143177	0.601399	0.0385885	0.216593	Chr02_7181(-0.658494880238|-0.739055424097)	Pig.02634	HERC2-201	E3 ubiquitin-protein ligase HERC2 isoform X1 [Sus scrofa]	Pig.17197	KPTN-201	kaptin isoform X1 [Sus scrofa]	0.942356	0.375087
Chr06_100219067_100265828	MSTRG.30891.2	Pig.08550	MSTRG.30891	circRNA	mRNA	2	0.116857	0.791595	0.0021561	0.0938036	mir-361:ssc-miR-361-3p(-0.76707648283|-0.811188811189);mir-874:ssc-miR-874(-0.630473821505|-0.783216783217)	Pig.08550	KIF1A-202	kinesin-like protein KIF1B isoform X2 [Sus scrofa]	MSTRG.30891			0.993772	0.257368
Chr06_100219067_100265828	Pig.19937.1	Pig.08550	Pig.19937	circRNA	mRNA	1	0.155054	0.647987	0.0226858	0.18051	Chr08_21275(-0.649122807018|-0.630473821505)	Pig.08550	KIF1A-202	kinesin-like protein KIF1B isoform X2 [Sus scrofa]	Pig.19937	INTS5-201	LOW QUALITY PROTEIN: integrator complex subunit 5 [Sus scrofa]	0.985426	0.243665
Chr06_100219067_100265828	Pig.17042.1	Pig.08550	Pig.17042	circRNA	mRNA	1	0.214024	0.591945	0.0425902	0.223159	Chr07_20261(-0.598950130429|-0.846153846154)	Pig.08550	KIF1A-202	kinesin-like protein KIF1B isoform X2 [Sus scrofa]	Pig.17042	C1QTNF6-201	complement C1q tumor necrosis factor-related protein 6 precursor [Sus scrofa]	0.828937	0.392444
Chr06_100219067_100265828	Pig.13902.1	Pig.08550	Pig.13902	circRNA	mRNA	1	0.155054	0.581437	0.0473736	0.23044	Chr17_39950(-0.623468556821|-0.601398601399)	Pig.08550	KIF1A-202	kinesin-like protein KIF1B isoform X2 [Sus scrofa]	Pig.13902	TUSC1-201	tumor suppressor candidate gene 1 protein [Sus scrofa]	0.981982	0.250881
Chr06_100219067_100265828	MSTRG.7340.1	Pig.08550	MSTRG.7340	circRNA	mRNA	1	0.0842105	0.770579	0.00335518	0.103583	Chr17_39950(-0.623468556821|-0.678321678322)	Pig.08550	KIF1A-202	kinesin-like protein KIF1B isoform X2 [Sus scrofa]	MSTRG.7340			0.957863	0.165388
Chr06_100219067_100265828	MSTRG.17795.1	Pig.08550	MSTRG.17795	circRNA	mRNA	1	0.0842105	0.690019	0.0130122	0.149599	mir-331:ssc-miR-331-3p(-0.619965924479|-0.629370629371)	Pig.08550	KIF1A-202	kinesin-like protein KIF1B isoform X2 [Sus scrofa]	MSTRG.17795			0.992472	0.198283
Chr06_100219067_100265828	MSTRG.21578.1	Pig.08550	MSTRG.21578	circRNA	mRNA	3	0.00430732	0.763574	0.00385009	0.107434	mir-361:ssc-miR-361-3p(-0.76707648283|-0.776223776224);Chr02_5821(-0.612960659796|-0.58041958042);mir-874:ssc-miR-874(-0.630473821505|-0.657342657343)	Pig.08550	KIF1A-202	kinesin-like protein KIF1B isoform X2 [Sus scrofa]	MSTRG.21578			0.99999	0.214769
Chr06_100219067_100265828	Pig.00221.1	Pig.08550	Pig.00221	circRNA	mRNA	1	0.0842105	0.645359	0.0234267	0.183841	Chr02_5821(-0.612960659796|-0.822194225522)	Pig.08550	KIF1A-202	kinesin-like protein KIF1B isoform X2 [Sus scrofa]	Pig.00221	SCN3A-201	sodium channel protein type 3 subunit alpha isoform X6 [Sus scrofa]	0.854208	0.330984
Chr06_100219067_100265828	Pig.20549.1	Pig.08550	Pig.20549	circRNA	mRNA	1	0.155054	0.774082	0.00312666	0.10091	Chr17_39950(-0.623468556821|-0.692307692308)	Pig.08550	KIF1A-202	kinesin-like protein KIF1B isoform X2 [Sus scrofa]	Pig.20549	KIF24-201	uncharacterized protein LOC110257362 [Sus scrofa]	0.947682	0.167099
Chr06_100219067_100265828	Pig.12673.1	Pig.08550	Pig.12673	circRNA	mRNA	2	0.00668338	0.619966	0.0315202	0.201756	Chr08_21314(-0.585964912281|-0.68301330663);Chr08_21313(-0.585964912281|-0.68301330663)	Pig.08550	KIF1A-202	kinesin-like protein KIF1B isoform X2 [Sus scrofa]	Pig.12673	HYI-202	putative hydroxypyruvate isomerase isoform X1 [Sus scrofa]	0.994151	0.248698
Chr06_100219067_100265828	Pig.10509.1	Pig.08550	Pig.10509	circRNA	mRNA	1	0.155054	0.59895	0.0395981	0.218821	Chr08_21275(-0.649122807018|-0.718039630047)	Pig.08550	KIF1A-202	kinesin-like protein KIF1B isoform X2 [Sus scrofa]	Pig.10509	CCDC42-201	dolichol-phosphate mannosyltransferase subunit 3 [Sus scrofa]	0.949591	0.348015
Chr06_100219067_100265828	Pig.18787.1	Pig.08550	Pig.18787	circRNA	mRNA	1	0.0842105	0.626971	0.0291129	0.198294	Chr17_39950(-0.623468556821|-0.594405594406)	Pig.08550	KIF1A-202	kinesin-like protein KIF1B isoform X2 [Sus scrofa]	Pig.18787	TNFSF13-202	tumor necrosis factor ligand superfamily member 13 [Sus scrofa]	0.976136	0.219204
Chr06_100219067_100265828	Pig.18243.1	Pig.08550	Pig.18243	circRNA	mRNA	2	0.018557	0.596715	0.0405359	0.221137	Chr07_20261(-0.598950130429|-0.655992204061);Chr08_21275(-0.649122807018|-0.689243827105)	Pig.08550	KIF1A-202	kinesin-like protein KIF1B isoform X2 [Sus scrofa]	Pig.18243	DHX57-203	putative ATP-dependent RNA helicase TDRD9 isoform X2 [Sus scrofa]	0.998518	0.292656
Chr06_100219067_100265828	Pig.09067.1	Pig.08550	Pig.09067	circRNA	mRNA	1	0.0842105	0.595783	0.0409317	0.221137	mir-331:ssc-miR-331-3p(-0.619965924479|-0.75088181523)	Pig.08550	KIF1A-202	kinesin-like protein KIF1B isoform X2 [Sus scrofa]	Pig.09067	PMS2-201	mismatch repair endonuclease PMS2 isoform X1 [Sus scrofa]	0.9045	0.344408
Chr06_100219067_100265828	Pig.17875.1	Pig.08550	Pig.17875	circRNA	mRNA	1	0.0842105	0.823119	0.00100495	0.0847874	Chr17_39950(-0.623468556821|-0.692307692308)	Pig.08550	KIF1A-202	kinesin-like protein KIF1B isoform X2 [Sus scrofa]	Pig.17875	ENDOG-201	endonuclease G, mitochondrial isoform X2 [Heterocephalus glaber]	0.947682	0.12922
Chr06_100219067_100265828	Pig.17175.1	Pig.08550	Pig.17175	circRNA	mRNA	1	0.155054	0.735553	0.00640178	0.123576	Chr17_39950(-0.623468556821|-0.664335664336)	Pig.08550	KIF1A-202	kinesin-like protein KIF1B isoform X2 [Sus scrofa]	Pig.17175	CCDC8-201	coiled-coil domain-containing protein 8 [Sus scrofa]	0.968266	0.185636
Chr06_100219067_100265828	MSTRG.30061.2	Pig.08550	MSTRG.30061	circRNA	mRNA	1	0.301635	0.62807	0.0287476	0.198294	Chr08_21275(-0.649122807018|-0.722807017544)	Pig.08550	KIF1A-202	kinesin-like protein KIF1B isoform X2 [Sus scrofa]	MSTRG.30061			0.946292	0.325828
Chr06_100219067_100265828	Pig.22659.1	Pig.08550	Pig.22659	circRNA	mRNA	1	0.214024	0.633976	0.0268409	0.192217	Chr07_20261(-0.598950130429|-0.79020979021)	Pig.08550	KIF1A-202	kinesin-like protein KIF1B isoform X2 [Sus scrofa]	Pig.22659	GALK1-202	galactokinase [Sus scrofa]	0.86232	0.30656
Chr15_60901926_60909731	Pig.12620.1		Pig.12620	circRNA	mRNA	1	0.0105263	0.65149	0.0217247	0.178309	Chr02_7181(-0.777584379856|-0.79298245614)				Pig.12620	FAAH-201	fatty-acid amide hydrolase 1 [Sus scrofa]	0.990196	0.560441
Chr14_34850674_34869067	MSTRG.18963.2		MSTRG.18963	circRNA	mRNA	1	0.071345	0.577052	0.0494774	0.23365	Chr12_28094(-0.613215754989|-0.774081747514)				MSTRG.18963			0.884044	0.372341
Chr14_34850674_34869067	Pig.16362.1		Pig.16362	circRNA	mRNA	1	0.0209412	0.66283	0.0188163	0.170274	Chr09_23263(-0.639435750051|-0.643356643357)				Pig.16362	Hps6	Hermansky-Pudlak syndrome 6 protein [Sus scrofa]	0.996943	0.23564
Chr14_34850674_34869067	Pig.18905.1		Pig.18905	circRNA	mRNA	1	0.0105263	0.676898	0.0156172	0.160844	Chr09_23263(-0.639435750051|-0.666670770531)				Pig.18905	SVBP	PREDICTED: small vasohibin-binding protein [Felis catus]	0.979148	0.239588
Chr14_41912046_41938885	MSTRG.30891.2	Pig.07715	MSTRG.30891	circRNA	mRNA	1	0.117108	0.629371	0.0283197	0.195771	mir-361:ssc-miR-361-3p(-0.671328671329|-0.811188811189)	Pig.07715	KCTD9-201	BTB/POZ domain-containing protein KCTD9 [Sus scrofa]	MSTRG.30891			0.90566	0.433725
Chr14_41912046_41938885	MSTRG.21578.1	Pig.07715	MSTRG.21578	circRNA	mRNA	1	0.0756323	0.58042	0.047856	0.23044	mir-361:ssc-miR-361-3p(-0.671328671329|-0.776223776224)	Pig.07715	KCTD9-201	BTB/POZ domain-containing protein KCTD9 [Sus scrofa]	MSTRG.21578			0.927536	0.453473
Chr14_41912046_41938885	MSTRG.8524.2	Pig.07715	MSTRG.8524	circRNA	mRNA	1	0.0463686	0.686516	0.0136736	0.152823	mir-361:ssc-miR-361-3p(-0.671328671329|-0.619965924479)	Pig.07715	KCTD9-201	BTB/POZ domain-containing protein KCTD9 [Sus scrofa]	MSTRG.8524			0.960224	0.221686
Chr04_117045483_117065883	Pig.18835.1	MSTRG.12519,Pig.01753	Pig.18835	circRNA	mRNA	1	0.0368421	0.592601	0.0423034	0.223159	Chr05_13105(-0.584190661289|-0.835342519204)	MSTRG.12519,Pig.01753	HS2ST1	heparan sulfate 2-O-sulfotransferase 1 isoform X1 [Sus scrofa]	Pig.18835	PIK3R6-203	phosphoinositide 3-kinase regulatory subunit 6 isoform X3 [Sus scrofa]	0.823074	0.358157
Chr04_117045483_117065883	Pig.14580.1	MSTRG.12519,Pig.01753	Pig.14580	circRNA	mRNA	1	0.00526316	0.652566	0.0214353	0.178309	Chr05_13105(-0.584190661289|-0.791759431245)	MSTRG.12519,Pig.01753	HS2ST1	heparan sulfate 2-O-sulfotransferase 1 isoform X1 [Sus scrofa]	Pig.14580	TMEM173-202	stimulator of interferon genes protein isoform X3 [Sus scrofa]	0.849145	0.269262
Chr11_17907970_17928171	MSTRG.30891.2	Pig.03481	MSTRG.30891	circRNA	mRNA	1	0.0421053	0.619315	0.0317509	0.201944	mir-361:ssc-miR-361-3p(-0.662026519251|-0.811188811189)	Pig.03481	NBEA-201	neurobeachin isoform X12 [Sus scrofa]	MSTRG.30891			0.898751	0.431568
Chr05_66006614_66015070	Pig.12624.1	Pig.07499	Pig.12624	circRNA	mRNA	1	0.0105263	0.58474	0.0458312	0.227326	Chr08_21275(-0.617427079412|-0.663157894737)	Pig.07499	KDM5A-201	lysine-specific demethylase 5A [Sus scrofa]	Pig.12624	RAD54L-202	DNA repair and recombination protein RAD54-like [Sus scrofa]	0.964289	0.287023
Chr13_126149254_126150599	Pig.14580.1	Pig.02084	Pig.14580	circRNA	mRNA	1	0.0105263	0.65149	0.0217247	0.178309	Chr05_13105(-0.688858094621|-0.791759431245)	Pig.02084	PHLDB2-201	LOW QUALITY PROTEIN: pleckstrin homology-like domain family B member 2 [Sus scrofa]	Pig.14580	TMEM173-202	stimulator of interferon genes protein isoform X3 [Sus scrofa]	0.930501	0.411919
Chr13_181129183_181184025	Pig.02564.1		Pig.02564	circRNA	mRNA	1	0.0210526	0.643357	0.0240032	0.183841	mir-361:ssc-miR-361-3p(-0.678321678322|-0.594405594406)				Pig.02564	MXD3-201	max dimerization protein 3 [Sus scrofa]	0.934066	0.23691
Chr15_47277169_47298388	MSTRG.30891.2		MSTRG.30891	circRNA	mRNA	1	0.1503	0.629371	0.0283197	0.195771	mir-361:ssc-miR-361-3p(-0.825174825175|-0.811188811189)				MSTRG.30891			0.991453	0.750467
Chr13_95698281_95739739	Pig.20592.1	Pig.13039	Pig.20592	circRNA	mRNA	1	0.155054	0.802103	0.00169653	0.0904396	Chr10_25226(-0.619965924479|-0.65034965035)	Pig.13039	USP13-201	ubiquitin carboxyl-terminal hydrolase 13 isoform X1 [Sus scrofa]	Pig.20592	MFSD3-201	major facilitator superfamily domain-containing protein 3 isoform X2 [Sus scrofa]	0.976082	0.132829
Chr13_95698281_95739739	MSTRG.21578.1	Pig.13039	MSTRG.21578	circRNA	mRNA	1	0.301635	0.679511	0.0150702	0.159036	Chr02_5821(-0.577934336379|-0.58041958042)	Pig.13039	USP13-201	ubiquitin carboxyl-terminal hydrolase 13 isoform X1 [Sus scrofa]	MSTRG.21578			0.997855	0.161768
Chr13_95698281_95739739	Pig.08781.1	Pig.13039	Pig.08781	circRNA	mRNA	1	0.0842105	0.59895	0.0395981	0.218821	Chr03_7531(-0.651489615555|-0.769230769231)	Pig.13039	USP13-201	ubiquitin carboxyl-terminal hydrolase 13 isoform X1 [Sus scrofa]	Pig.08781	SEMA4B-201	semaphorin-4B [Sus scrofa]	0.917126	0.397192
Chr13_95698281_95739739	Pig.10509.1	Pig.13039	Pig.10509	circRNA	mRNA	1	0.155054	0.697024	0.011761	0.145686	Chr12_28849(-0.623468556821|-0.783216783217)	Pig.13039	USP13-201	ubiquitin carboxyl-terminal hydrolase 13 isoform X1 [Sus scrofa]	Pig.10509	CCDC42-201	dolichol-phosphate mannosyltransferase subunit 3 [Sus scrofa]	0.886436	0.267674
Chr13_95698281_95739739	Pig.12620.1	Pig.13039	Pig.12620	circRNA	mRNA	1	0.155054	0.724561	0.00768915	0.128133	Chr02_7181(-0.810526315789|-0.79298245614)	Pig.13039	USP13-201	ubiquitin carboxyl-terminal hydrolase 13 isoform X1 [Sus scrofa]	Pig.12620	FAAH-201	fatty-acid amide hydrolase 1 [Sus scrofa]	0.989059	0.495245
Chr13_95698281_95739739	Pig.15616.1	Pig.13039	Pig.15616	circRNA	mRNA	1	0.0842105	0.711034	0.00952876	0.134875	Chr12_28849(-0.623468556821|-0.776223776224)	Pig.13039	USP13-201	ubiquitin carboxyl-terminal hydrolase 13 isoform X1 [Sus scrofa]	Pig.15616	SNX17-201	PREDICTED: sorting nexin-17 isoform X1 [Trichechus manatus latirostris]	0.890865	0.250347
Chr13_95698281_95739739	MSTRG.10050.1	Pig.13039	MSTRG.10050	circRNA	mRNA	1	0.155054	0.640351	0.0248876	0.187006	Chr12_28849(-0.623468556821|-0.718039630047)	Pig.13039	USP13-201	ubiquitin carboxyl-terminal hydrolase 13 isoform X1 [Sus scrofa]	MSTRG.10050			0.929504	0.286277
Chr13_95698281_95739739	Pig.17197.1	Pig.13039	Pig.17197	circRNA	mRNA	1	0.214024	0.577934	0.0490488	0.233043	Chr02_7181(-0.810526315789|-0.739055424097)	Pig.13039	USP13-201	ubiquitin carboxyl-terminal hydrolase 13 isoform X1 [Sus scrofa]	Pig.17197	KPTN-201	kaptin isoform X1 [Sus scrofa]	0.953877	0.631386
Chr12_6974079_7002516	MSTRG.8524.2		MSTRG.8524	circRNA	mRNA	1	0.0463686	0.697059	0.0117549	0.145686	mir-615:ssc-miR-615(-0.59084087202|-0.812610703272)				MSTRG.8524			0.841983	0.235692
Chr18_7361691_7406444	Pig.05717.1		Pig.05717	circRNA	mRNA	1	0.116503	0.737663	0.00617447	0.122065	Chr05_13105(-0.717862645974|-0.772246730814)				Pig.05717	SLC5A1	sodium/glucose cotransporter 1-like isoform X1 [Sus scrofa]	0.963503	0.32325
Chr18_7361691_7406444	MSTRG.19396.1		MSTRG.19396	circRNA	mRNA	1	0.116503	0.615385	0.0331699	0.205087	Chr03_9544(-0.72027972028|-0.853146853147)				MSTRG.19396			0.915556	0.612952
Chr18_7361691_7406444	Pig.22620.1		Pig.22620	circRNA	mRNA	1	0.187792	0.664336	0.0184527	0.168318	Chr12_28094(-0.633976453846|-0.72504489473)				Pig.22620	RGS12-201	LOW QUALITY PROTEIN: regulator of G-protein signaling 12 [Sus scrofa]	0.93299	0.280049
Chr18_7361691_7406444	Pig.16026.1		Pig.16026	circRNA	mRNA	1	0.0315789	0.671329	0.0168315	0.162623	Chr02_7222(-0.576603742574|-0.63711154272)				Pig.16026	CLIP3-201	CAP-Gly domain-containing linker protein 3 [Sus scrofa]	0.950147	0.18864
Chr18_7361691_7406444	Pig.18322.1		Pig.18322	circRNA	mRNA	1	0.0315789	0.622378	0.0306759	0.199692	Chr05_13105(-0.717862645974|-0.833880851384)				Pig.18322	SELENBP1-201	selenium-binding protein 1 isoform X1 [Sus scrofa]	0.925234	0.560529
Chr18_7361691_7406444	MSTRG.18963.2		MSTRG.18963	circRNA	mRNA	2	0.0157367	0.804196	0.00161477	0.0904396	Chr03_9544(-0.72027972028|-0.874125874126);Chr12_28094(-0.633976453846|-0.774081747514)				MSTRG.18963			0.990394	0.225008
Chr18_7361691_7406444	Pig.21446.1		Pig.21446	circRNA	mRNA	1	0.0315789	0.629371	0.0283197	0.195771	Chr12_28094(-0.633976453846|-0.86865282074)				Pig.21446	CYBA-201	cytochrome b-245 light chain isoform X1 [Sus scrofa]	0.843823	0.424051
Chr18_7361691_7406444	MSTRG.9483.1		MSTRG.9483	circRNA	mRNA	1	0.0614871	0.762238	0.00395045	0.107434	Chr02_7222(-0.576603742574|-0.697619342867)				MSTRG.9483			0.905028	0.147265
Chr18_7361691_7406444	Pig.12332.1		Pig.12332	circRNA	mRNA	1	0.0614871	0.608392	0.035806	0.209995	Chr11_26361(-0.601398601399|-0.65034965035)				Pig.12332	SPPL2B-201	signal peptide peptidase-like 2B isoform X1 [Sus scrofa]	0.960894	0.250394
Chr18_7361691_7406444	Pig.02298.1		Pig.02298	circRNA	mRNA	1	0.0315789	0.601399	0.0385885	0.216593	Chr05_13105(-0.717862645974|-0.652602405431)				Pig.02298	GLDN-201	gliomedin [Sus scrofa]	0.952381	0.349418
Chr18_7361691_7406444	Pig.19812.1		Pig.19812	circRNA	mRNA	1	0.0614871	0.594406	0.0415215	0.221137	Chr03_9544(-0.72027972028|-0.818181818182)				Pig.19812	SGSH-201	N-sulphoglucosamine sulphohydrolase [Sus scrofa]	0.936364	0.581654
Chr18_7361691_7406444	Pig.10835.1		Pig.10835	circRNA	mRNA	2	0.00782949	0.58494	0.0457391	0.227326	Chr03_9544(-0.72027972028|-0.844134394348);Chr02_7222(-0.576603742574|-0.661404191629)				Pig.10835	DISP1-201	protein dispatched homolog 1 isoform X3 [Sus scrofa]	0.99452	0.449858
Chr18_7361691_7406444	MSTRG.34889.1		MSTRG.34889	circRNA	mRNA	1	0.0315789	0.740355	0.00589329	0.119527	Chr11_26361(-0.601398601399|-0.652635596415)				MSTRG.34889			0.959142	0.165702
Chr18_7361691_7406444	Pig.21030.1		Pig.21030	circRNA	mRNA	1	0.0315789	0.671329	0.0168315	0.162623	Chr05_13105(-0.717862645974|-0.717862645974)				Pig.21030	Gm42048	gag protein [Porcine endogenous retrovirus C]	1	0.349458
Chr18_7361691_7406444	Pig.19810.1		Pig.19810	circRNA	mRNA	1	0.0897776	0.65035	0.0220342	0.178309	Chr05_13105(-0.717862645974|-0.739616059488)				Pig.19810	RNF213	PREDICTED: LOW QUALITY PROTEIN: E3 ubiquitin-protein ligase RNF213 [Balaenoptera acutorostrata scammoni]	0.985075	0.395508
Chr18_7361691_7406444	Pig.01857.1		Pig.01857	circRNA	mRNA	1	0.0315789	0.65035	0.0220342	0.178309	Chr03_9544(-0.72027972028|-0.832167832168)				Pig.01857	SRPX-204	sushi repeat-containing protein SRPX isoform X1 [Sus scrofa]	0.927928	0.517881
Chr18_7361691_7406444	Pig.14701.1		Pig.14701	circRNA	mRNA	1	0.0315789	0.637479	0.0257544	0.189707	Chr05_13105(-0.717862645974|-0.65011439538)				Pig.14701	IFT122-201	LOW QUALITY PROTEIN: intraflagellar transport protein 122 homolog [Sus scrofa]	0.950476	0.314623
Chr18_7361691_7406444	Pig.03052.1		Pig.03052	circRNA	mRNA	1	0.0897776	0.629371	0.0283197	0.195771	Chr03_9544(-0.72027972028|-0.839160839161)				Pig.03052	MTMR9	myotubularin-related protein 9 [Sus scrofa]	0.923767	0.563266
Chr18_7361691_7406444	MSTRG.12911.1		MSTRG.12911	circRNA	mRNA	1	0.0315789	0.636364	0.0260969	0.189707	Chr12_28094(-0.633976453846|-0.633976453846)				MSTRG.12911			1	0.244376
Chr18_7361691_7406444	MSTRG.36474.1		MSTRG.36474	circRNA	mRNA	1	0.0897776	0.601399	0.0385885	0.216593	Chr05_13105(-0.717862645974|-0.841131989222)				MSTRG.36474			0.92093	0.607822
Chr18_7361691_7406444	MSTRG.30061.2		MSTRG.30061	circRNA	mRNA	1	0.141714	0.633976	0.0268409	0.192217	Chr11_26361(-0.601398601399|-0.676008041947)				MSTRG.30061			0.941593	0.247684
Chr18_7361691_7406444	Pig.10363.1		Pig.10363	circRNA	mRNA	1	0.0897776	0.58042	0.047856	0.23044	Chr11_26361(-0.601398601399|-0.622377622378)				Pig.10363	CORO7-PAM16	coronin-7 isoform X1 [Sus scrofa]	0.982857	0.250809
Chr18_7361691_7406444	Pig.15342.1		Pig.15342	circRNA	mRNA	1	0.0315789	0.644484	0.0236773	0.183841	Chr03_9544(-0.72027972028|-0.816113335614)				Pig.15342	TNKS1BP1	182 kDa tankyrase-1-binding protein-like [Sus scrofa]	0.937624	0.503157
Chr18_7361691_7406444	Pig.18835.1		Pig.18835	circRNA	mRNA	1	0.187792	0.739055	0.00602782	0.119527	Chr05_13105(-0.717862645974|-0.835342519204)				Pig.18835	PIK3R6-203	phosphoinositide 3-kinase regulatory subunit 6 isoform X3 [Sus scrofa]	0.924363	0.374829
Chr18_7361691_7406444	Pig.12641.1		Pig.12641	circRNA	mRNA	1	0.0897776	0.608392	0.035806	0.209995	Chr03_9544(-0.72027972028|-0.839160839161)				Pig.12641	MUTYH	adenine DNA glycosylase isoform X1 [Sus scrofa]	0.923767	0.597893
Chr18_7361691_7406444	Pig.00949.1		Pig.00949	circRNA	mRNA	1	0.0315789	0.626776	0.0291781	0.198294	Chr02_7222(-0.576603742574|-0.591432041227)				Pig.00949	EPHA3-201	PREDICTED: ephrin type-A receptor 3-like [Physeter catodon]	0.987305	0.193034
Chr18_7361691_7406444	Pig.09740.1		Pig.09740	circRNA	mRNA	1	0.0897776	0.758523	0.00423989	0.110806	Chr05_13105(-0.717862645974|-0.666671342519)				Pig.09740	CARMIL3-201	LOW QUALITY PROTEIN: capping protein, Arp2/3 and myosin-I linker protein 3 [Sus scrofa]	0.963026	0.219029
Chr18_7361691_7406444	MSTRG.9602.1		MSTRG.9602	circRNA	mRNA	1	0.165461	0.58042	0.047856	0.23044	Chr05_13105(-0.717862645974|-0.804876300031)				MSTRG.9602			0.942857	0.574056
Chr14_24730872_24760271	Pig.15991.1	Pig.12220	Pig.15991	circRNA	mRNA	3	0.000410629	0.584522	0.045932	0.227326	ChrX_42092(-0.692307692308|-0.676073102596);Chr03_8533(-0.657342657343|-0.61973367738);Chr07_20261(-0.678321678322|-0.711285243356)	Pig.12220	B3GALNT2-201	UDP-GalNAc:beta-1,3-N-acetylgalactosaminyltransferase 2 [Sus scrofa]	Pig.15991	CD22-201	B-cell receptor CD22 [Sus scrofa]	0.999986	0.345806
Chr14_24730872_24760271	Pig.12664.1	Pig.12220	Pig.12664	circRNA	mRNA	3	0.00010665	0.756569	0.00439849	0.112606	ChrX_42092(-0.692307692308|-0.893171247131);Chr03_8533(-0.657342657343|-0.847637026689);Chr07_20261(-0.678321678322|-0.93170020289)	Pig.12220	B3GALNT2-201	UDP-GalNAc:beta-1,3-N-acetylgalactosaminyltransferase 2 [Sus scrofa]	Pig.12664	CCDC24-202	coiled-coil domain-containing protein 24 isoform X2 [Sus scrofa]	0.997349	0.292785
Chr14_24730872_24760271	Pig.14953.1	Pig.12220	Pig.14953	circRNA	mRNA	1	0.0526316	0.713287	0.00920178	0.1336	ssc-miR-7137-3p(-0.664335664336|-0.629370629371)	Pig.12220	B3GALNT2-201	UDP-GalNAc:beta-1,3-N-acetylgalactosaminyltransferase 2 [Sus scrofa]	Pig.14953	NEURL2-201	neuralized-like protein 2 [Sus scrofa]	0.972973	0.205099
Chr14_24730872_24760271	MSTRG.34975.2	Pig.12220	MSTRG.34975	circRNA	mRNA	1	0.0526316	0.581437	0.0473736	0.23044	Chr12_28849(-0.594405594406|-0.728547527072)	Pig.12220	B3GALNT2-201	UDP-GalNAc:beta-1,3-N-acetylgalactosaminyltransferase 2 [Sus scrofa]	MSTRG.34975			0.898604	0.312063
Chr14_24730872_24760271	Pig.16786.1	Pig.12220	Pig.16786	circRNA	mRNA	1	0.181715	0.725045	0.00762875	0.127324	Chr12_28849(-0.594405594406|-0.672505409605)	Pig.12220	B3GALNT2-201	UDP-GalNAc:beta-1,3-N-acetylgalactosaminyltransferase 2 [Sus scrofa]	Pig.16786	TTYH1-201	protein tweety homolog 1 isoform X1 [Sus scrofa]	0.938354	0.178459
Chr14_24730872_24760271	Pig.20023.1	Pig.12220	Pig.20023	circRNA	mRNA	1	0.0526316	0.608392	0.035806	0.209995	Chr12_28849(-0.594405594406|-0.685314685315)	Pig.12220	B3GALNT2-201	UDP-GalNAc:beta-1,3-N-acetylgalactosaminyltransferase 2 [Sus scrofa]	Pig.20023	MYADML2-201	myeloid-associated differentiation marker-like protein 2 [Sus scrofa]	0.928962	0.265109
Chr14_24730872_24760271	Pig.13071.1	Pig.12220	Pig.13071	circRNA	mRNA	1	0.100251	0.745241	0.0054078	0.119527	ssc-miR-7137-3p(-0.664335664336|-0.702452338586)	Pig.12220	B3GALNT2-201	UDP-GalNAc:beta-1,3-N-acetylgalactosaminyltransferase 2 [Sus scrofa]	Pig.13071	COL2A1-201	LOW QUALITY PROTEIN: collagen alpha-1(II) chain [Sus scrofa]	0.972112	0.221572
Chr14_24730872_24760271	MSTRG.34668.1	Pig.12220	MSTRG.34668	circRNA	mRNA	1	0.0526316	0.718328	0.00850036	0.130155	Chr12_28849(-0.594405594406|-0.721848885584)	Pig.12220	B3GALNT2-201	UDP-GalNAc:beta-1,3-N-acetylgalactosaminyltransferase 2 [Sus scrofa]	MSTRG.34668			0.903177	0.198571
Chr14_24730872_24760271	Pig.10509.1	Pig.12220	Pig.10509	circRNA	mRNA	2	0.00250627	0.65035	0.0220342	0.178309	Chr08_21275(-0.844134394348|-0.718039630047);Chr12_28849(-0.594405594406|-0.783216783217)	Pig.12220	B3GALNT2-201	UDP-GalNAc:beta-1,3-N-acetylgalactosaminyltransferase 2 [Sus scrofa]	Pig.10509	CCDC42-201	dolichol-phosphate mannosyltransferase subunit 3 [Sus scrofa]	0.98735	0.406281
Chr14_24730872_24760271	Pig.18243.1	Pig.12220	Pig.18243	circRNA	mRNA	2	0.00719885	0.633372	0.0270318	0.192927	Chr07_20261(-0.678321678322|-0.655992204061);Chr08_21275(-0.844134394348|-0.689243827105)	Pig.12220	B3GALNT2-201	UDP-GalNAc:beta-1,3-N-acetylgalactosaminyltransferase 2 [Sus scrofa]	Pig.18243	DHX57-203	putative ATP-dependent RNA helicase TDRD9 isoform X2 [Sus scrofa]	0.994758	0.39715
Chr14_24730872_24760271	Pig.15616.1	Pig.12220	Pig.15616	circRNA	mRNA	1	0.0526316	0.636364	0.0260969	0.189707	Chr12_28849(-0.594405594406|-0.776223776224)	Pig.12220	B3GALNT2-201	UDP-GalNAc:beta-1,3-N-acetylgalactosaminyltransferase 2 [Sus scrofa]	Pig.15616	SNX17-201	PREDICTED: sorting nexin-17 isoform X1 [Trichechus manatus latirostris]	0.867347	0.291246
Chr14_24730872_24760271	Pig.08043.1	Pig.12220	Pig.08043	circRNA	mRNA	1	0.0526316	0.776224	0.00299286	0.100207	ssc-miR-7137-3p(-0.664335664336|-0.783216783217)	Pig.12220	B3GALNT2-201	UDP-GalNAc:beta-1,3-N-acetylgalactosaminyltransferase 2 [Sus scrofa]	Pig.08043	RGS9-201	regulator of G-protein signaling 9 isoform X1 [Sus scrofa]	0.917874	0.225555
Chr14_24730872_24760271	Pig.14753.1	Pig.12220	Pig.14753	circRNA	mRNA	1	0.100251	0.587413	0.0446093	0.225097	Chr08_21275(-0.844134394348|-0.693521203655)	Pig.12220	B3GALNT2-201	UDP-GalNAc:beta-1,3-N-acetylgalactosaminyltransferase 2 [Sus scrofa]	Pig.14753	VWCE-201	von Willebrand factor C and EGF domain-containing protein isoform X1 [Sus scrofa]	0.90205	0.582267
Chr14_24730872_24760271	MSTRG.30061.2	Pig.12220	MSTRG.30061	circRNA	mRNA	2	0.0219816	0.683013	0.0143594	0.155729	Chr08_21275(-0.844134394348|-0.722807017544);Chr12_28849(-0.594405594406|-0.595447498088)	Pig.12220	B3GALNT2-201	UDP-GalNAc:beta-1,3-N-acetylgalactosaminyltransferase 2 [Sus scrofa]	MSTRG.30061			0.997002	0.329997
Chr14_24730872_24760271	Pig.22659.1	Pig.12220	Pig.22659	circRNA	mRNA	3	0.00010665	0.629371	0.0283197	0.195771	Chr07_20261(-0.678321678322|-0.79020979021);Chr03_8533(-0.657342657343|-0.657342657343);ChrX_42092(-0.692307692308|-0.741258741259)	Pig.12220	B3GALNT2-201	UDP-GalNAc:beta-1,3-N-acetylgalactosaminyltransferase 2 [Sus scrofa]	Pig.22659	GALK1-202	galactokinase [Sus scrofa]	0.999839	0.364511
Chr14_24730872_24760271	Pig.10482.1	Pig.12220	Pig.10482	circRNA	mRNA	1	0.0526316	0.775924	0.00301135	0.100207	ssc-miR-7137-3p(-0.664335664336|-0.644230107444)	Pig.12220	B3GALNT2-201	UDP-GalNAc:beta-1,3-N-acetylgalactosaminyltransferase 2 [Sus scrofa]	Pig.10482	UBAP2L-204	PREDICTED: ubiquitin-associated protein 2-like isoform X4 [Pteropus vampyrus]	0.984635	0.167279
Chr07_27765979_27767871	Pig.08828.1	Pig.18231	Pig.08828	circRNA	mRNA	1	0.0157895	0.601399	0.0385885	0.216593	Chr09_23263(-0.608391608392|-0.601398601399)	Pig.18231	CDC42BPA-205	serine/threonine-protein kinase MRCK beta isoform X2 [Sus scrofa]	Pig.08828	UNC45A-201	protein unc-45 homolog A isoform X2 [Sus scrofa]	0.99422	0.229972
Chr07_27765979_27767871	MSTRG.9483.1	Pig.18231	MSTRG.9483	circRNA	mRNA	1	0.0105263	0.601399	0.0385885	0.216593	Chr09_23263(-0.608391608392|-0.706293706294)	Pig.18231	CDC42BPA-205	serine/threonine-protein kinase MRCK beta isoform X2 [Sus scrofa]	MSTRG.9483			0.925532	0.295799
Chr07_27765979_27767871	Pig.16362.1	Pig.18231	Pig.16362	circRNA	mRNA	1	0.0105263	0.727273	0.00735503	0.127324	Chr09_23263(-0.608391608392|-0.643356643357)	Pig.18231	CDC42BPA-205	serine/threonine-protein kinase MRCK beta isoform X2 [Sus scrofa]	Pig.16362	Hps6	Hermansky-Pudlak syndrome 6 protein [Sus scrofa]	0.972067	0.174491
Chr07_27765979_27767871	Pig.03571.1	Pig.18231	Pig.03571	circRNA	mRNA	1	0.00526316	0.636364	0.0260969	0.189707	Chr09_23263(-0.608391608392|-0.671328671329)	Pig.18231	CDC42BPA-205	serine/threonine-protein kinase MRCK beta isoform X2 [Sus scrofa]	Pig.03571	TBC1D2B-201	TBC1 domain family member 2B isoform X2 [Sus scrofa]	0.95082	0.248862
Chr07_27765979_27767871	Pig.12785.1	Pig.18231	Pig.12785	circRNA	mRNA	1	0.00526316	0.678322	0.0153173	0.159036	Chr09_23263(-0.608391608392|-0.601398601399)	Pig.18231	CDC42BPA-205	serine/threonine-protein kinase MRCK beta isoform X2 [Sus scrofa]	Pig.12785	CRTAP-201	cartilage-associated protein [Sus scrofa]	0.99422	0.185579
Chr07_27765979_27767871	Pig.18835.1	Pig.18231	Pig.18835	circRNA	mRNA	1	0.0368421	0.588442	0.0441448	0.225097	Chr09_23263(-0.608391608392|-0.658494880238)	Pig.18231	CDC42BPA-205	serine/threonine-protein kinase MRCK beta isoform X2 [Sus scrofa]	Pig.18835	PIK3R6-203	phosphoinositide 3-kinase regulatory subunit 6 isoform X3 [Sus scrofa]	0.960452	0.273984
Chr07_27765979_27767871	Pig.18905.1	Pig.18231	Pig.18905	circRNA	mRNA	1	0.00526316	0.750882	0.00488554	0.118436	Chr09_23263(-0.608391608392|-0.666670770531)	Pig.18231	CDC42BPA-205	serine/threonine-protein kinase MRCK beta isoform X2 [Sus scrofa]	Pig.18905	SVBP	PREDICTED: small vasohibin-binding protein [Felis catus]	0.954293	0.167176
Chr07_27765979_27767871	Pig.17197.1	Pig.18231	Pig.17197	circRNA	mRNA	1	0.0157895	0.699301	0.0113742	0.14423	Chr09_23263(-0.608391608392|-0.72027972028)	Pig.18231	CDC42BPA-205	serine/threonine-protein kinase MRCK beta isoform X2 [Sus scrofa]	Pig.17197	KPTN-201	kaptin isoform X1 [Sus scrofa]	0.915789	0.225054
Chr07_84134001_84147684	Pig.22620.1	Pig.09696	Pig.22620	circRNA	mRNA	1	0.0368421	0.840632	0.000615569	0.0767553	Chr12_28094(-0.901754385965|-0.72504489473)	Pig.09696	PRKD1-201	serine/threonine-protein kinase D1 isoform X2 [Sus scrofa]	Pig.22620	RGS12-201	LOW QUALITY PROTEIN: regulator of G-protein signaling 12 [Sus scrofa]	0.891376	0.213069
Chr07_84134001_84147684	MSTRG.18963.2	Pig.09696	MSTRG.18963	circRNA	mRNA	1	0.0368421	0.756569	0.00439849	0.112606	Chr12_28094(-0.901754385965|-0.774081747514)	Pig.09696	PRKD1-201	serine/threonine-protein kinase D1 isoform X2 [Sus scrofa]	MSTRG.18963			0.923816	0.542657
Chr07_84134001_84147684	Pig.21446.1	Pig.09696	Pig.21446	circRNA	mRNA	1	0.00526316	0.777584	0.00291017	0.100207	Chr12_28094(-0.901754385965|-0.86865282074)	Pig.09696	PRKD1-201	serine/threonine-protein kinase D1 isoform X2 [Sus scrofa]	Pig.21446	CYBA-201	cytochrome b-245 light chain isoform X1 [Sus scrofa]	0.981303	0.804328
Chr07_84134001_84147684	MSTRG.12911.1	Pig.09696	MSTRG.12911	circRNA	mRNA	1	0.00526316	0.693521	0.0123749	0.148606	Chr12_28094(-0.901754385965|-0.633976453846)	Pig.09696	PRKD1-201	serine/threonine-protein kinase D1 isoform X2 [Sus scrofa]	MSTRG.12911			0.825635	0.329066
Chr07_84134001_84147684	MSTRG.21693.1	Pig.09696	MSTRG.21693	circRNA	mRNA	1	0.0263158	0.721053	0.00813826	0.128514	Chr12_28094(-0.901754385965|-0.652631578947)	Pig.09696	PRKD1-201	serine/threonine-protein kinase D1 isoform X2 [Sus scrofa]	MSTRG.21693			0.839729	0.316358
Chr01_3467978_3519068	MSTRG.30891.2	Pig.03801	MSTRG.30891	circRNA	mRNA	1	0.208755	0.754568	0.00456545	0.113765	mir-361:ssc-miR-361-3p(-0.811516378437|-0.811188811189)	Pig.03801	TMEM245-202	transmembrane protein 245 isoform X1 [Sus scrofa]	MSTRG.30891			0.999798	0.472821
Chr01_3467978_3519068	Pig.21446.1	Pig.03801	Pig.21446	circRNA	mRNA	1	0.0315789	0.580163	0.0479782	0.230697	Chr12_28094(-0.631097261015|-0.86865282074)	Pig.03801	TMEM245-202	transmembrane protein 245 isoform X1 [Sus scrofa]	Pig.21446	CYBA-201	cytochrome b-245 light chain isoform X1 [Sus scrofa]	0.841603	0.497002
Chr01_3467978_3519068	Pig.10509.1	Pig.03801	Pig.10509	circRNA	mRNA	2	0.000835422	0.701179	0.0110624	0.14423	Chr08_21275(-0.595442048528|-0.718039630047);Chr12_28849(-0.676263648698|-0.783216783217)	Pig.03801	TMEM245-202	transmembrane protein 245 isoform X1 [Sus scrofa]	Pig.10509	CCDC42-201	dolichol-phosphate mannosyltransferase subunit 3 [Sus scrofa]	0.992959	0.269265
Chr01_3467978_3519068	Pig.15616.1	Pig.03801	Pig.15616	circRNA	mRNA	1	0.0315789	0.662027	0.0190123	0.170274	Chr12_28849(-0.676263648698|-0.776223776224)	Pig.03801	TMEM245-202	transmembrane protein 245 isoform X1 [Sus scrofa]	Pig.15616	SNX17-201	PREDICTED: sorting nexin-17 isoform X1 [Trichechus manatus latirostris]	0.93118	0.366839
Chr13_46811147_46814259	MSTRG.30891.2		MSTRG.30891	circRNA	mRNA	1	0.0421053	0.699301	0.0113742	0.14423	mir-423:ssc-miR-423-5p(-0.699300699301|-0.818181818182)				MSTRG.30891			0.921659	0.389942
Chr10_34829590_34833421	Pig.15991.1	Pig.14082	Pig.15991	circRNA	mRNA	1	0.0210526	0.584522	0.045932	0.227326	ChrX_42092(-0.671328671329|-0.676073102596)	Pig.14082	LARP4B	la-related protein 4B isoform X3 [Sus scrofa]	Pig.15991	CD22-201	B-cell receptor CD22 [Sus scrofa]	0.996479	0.345277
Chr10_34829590_34833421	Pig.14132.1	Pig.14082	Pig.14132	circRNA	mRNA	1	0.0105263	0.706294	0.0102452	0.139666	ChrX_42092(-0.671328671329|-0.769230769231)	Pig.14082	LARP4B	la-related protein 4B isoform X3 [Sus scrofa]	Pig.14132	MYH3-201	LOW QUALITY PROTEIN: myosin-3 [Sus scrofa]	0.932039	0.305333
Chr10_34829590_34833421	Pig.11889.1	Pig.14082	Pig.11889	circRNA	mRNA	1	0.0157895	0.657343	0.0201855	0.173534	ChrX_42092(-0.671328671329|-0.776223776224)	Pig.14082	LARP4B	la-related protein 4B isoform X3 [Sus scrofa]	Pig.11889	E2F1-201	transcription factor E2F1 [Sus scrofa]	0.927536	0.365774
Chr10_34829590_34833421	Pig.23396.1	Pig.14082	Pig.23396	circRNA	mRNA	1	0.0157895	0.601399	0.0385885	0.216593	ChrX_42092(-0.671328671329|-0.734265734266)	Pig.14082	LARP4B	la-related protein 4B isoform X3 [Sus scrofa]	Pig.23396	FDXR-201	NADPH:adrenodoxin oxidoreductase, mitochondrial isoform X1 [Sus scrofa]	0.955224	0.385825
Chr10_34829590_34833421	Pig.09123.1	Pig.14082	Pig.09123	circRNA	mRNA	1	0.0157895	0.622378	0.0306759	0.199692	ChrX_42092(-0.671328671329|-0.65034965035)	Pig.14082	LARP4B	la-related protein 4B isoform X3 [Sus scrofa]	Pig.09123	AP4M1-201	AP-4 complex subunit mu-1 isoform X2 [Sus scrofa]	0.984127	0.292403
Chr10_34829590_34833421	Pig.22659.1	Pig.14082	Pig.22659	circRNA	mRNA	1	0.0157895	0.608392	0.035806	0.209995	ChrX_42092(-0.671328671329|-0.741258741259)	Pig.14082	LARP4B	la-related protein 4B isoform X3 [Sus scrofa]	Pig.22659	GALK1-202	galactokinase [Sus scrofa]	0.950495	0.385743
Chr13_17238049_17243345	MSTRG.37007.3	Pig.10900	MSTRG.37007	circRNA	mRNA	1	0.0312448	0.627032	0.0290927	0.198294	mir-196:ssc-miR-196a(-0.643356643357|-0.757663141906)	Pig.10900	DENND6A-201	protein DENND6A isoform X1 [Sus scrofa]	MSTRG.37007			0.918412	0.347665
Chr05_20526478_20543229	Pig.16206.1	Pig.19106	Pig.16206	circRNA	mRNA	1	0.00526316	0.83182	0.000793116	0.0795415	mir-10:ssc-miR-125a(-0.776223776224|-0.653832571283)	Pig.19106	TBC1D22A-201	LOW QUALITY PROTEIN: TBC1 domain family member 22A [Sus scrofa]	Pig.16206	DNMT1-202	unnamed protein product [Homo sapiens]	0.914415	0.151987
Chr03_19654503_19689919	Pig.13071.1		Pig.13071	circRNA	mRNA	1	0.109663	0.653359	0.0212242	0.177393	ssc-miR-7137-3p(-0.612196566189|-0.702452338586)				Pig.13071	COL2A1-201	LOW QUALITY PROTEIN: collagen alpha-1(II) chain [Sus scrofa]	0.931346	0.256536
Chr03_19654503_19689919	Pig.08043.1		Pig.08043	circRNA	mRNA	1	0.0578947	0.747449	0.00519858	0.119451	ssc-miR-7137-3p(-0.612196566189|-0.783216783217)				Pig.08043	RGS9-201	regulator of G-protein signaling 9 isoform X1 [Sus scrofa]	0.877441	0.202381
Chr03_19654503_19689919	Pig.01670.1		Pig.01670	circRNA	mRNA	1	0.0578947	0.609704	0.0353002	0.209995	ssc-miR-7137-3p(-0.612196566189|-0.72504489473)				Pig.01670	COL11A1-201	LOW QUALITY PROTEIN: collagen alpha-1(XI) chain [Sus scrofa]	0.915611	0.305176
Chr03_19654503_19689919	Pig.10482.1		Pig.10482	circRNA	mRNA	1	0.0578947	0.57971	0.0481944	0.231467	ssc-miR-7137-3p(-0.612196566189|-0.644230107444)				Pig.10482	UBAP2L-204	PREDICTED: ubiquitin-associated protein 2-like isoform X4 [Pteropus vampyrus]	0.974504	0.273282
Chr03_19654503_19689919	MSTRG.21693.1		MSTRG.21693	circRNA	mRNA	3	0.00134332	0.713104	0.00922795	0.133618	ChrX_42092(-0.647789389805|-0.735552791755);Chr03_8533(-0.761686425375|-0.823118600298);Chr07_20261(-0.63711154272|-0.714536997705)				MSTRG.21693			0.999833	0.322836
Chr15_121744453_121769437	Pig.20592.1	Pig.14206	Pig.20592	circRNA	mRNA	1	0.0614871	0.615385	0.0331699	0.205087	mir-361:ssc-miR-361-3p(-0.636363636364|-0.643356643357)	Pig.14206	TNS1-207	PREDICTED: tensin-1 isoform X1 [Orcinus orca]	Pig.20592	MFSD3-201	major facilitator superfamily domain-containing protein 3 isoform X2 [Sus scrofa]	0.994536	0.266598
Chr15_121744453_121769437	MSTRG.30891.2	Pig.14206	MSTRG.30891	circRNA	mRNA	2	0.0205237	0.685315	0.013906	0.152823	mir-361:ssc-miR-361-3p(-0.636363636364|-0.811188811189);mir-423:ssc-miR-423-5p(-0.748251748252|-0.818181818182)	Pig.14206	TNS1-207	PREDICTED: tensin-1 isoform X1 [Orcinus orca]	MSTRG.30891			0.99171	0.402045
Chr15_121744453_121769437	MSTRG.21578.1	Pig.14206	MSTRG.21578	circRNA	mRNA	2	0.00782949	0.671329	0.0168315	0.162623	mir-361:ssc-miR-361-3p(-0.636363636364|-0.776223776224);Chr02_4243(-0.626971189163|-0.735552791755)	Pig.14206	TNS1-207	PREDICTED: tensin-1 isoform X1 [Orcinus orca]	MSTRG.21578			0.991923	0.289876
Chr15_121744453_121769437	MSTRG.8524.2	Pig.14206	MSTRG.8524	circRNA	mRNA	1	0.0897776	0.725045	0.00762875	0.127324	mir-361:ssc-miR-361-3p(-0.636363636364|-0.619965924479)	Pig.14206	TNS1-207	PREDICTED: tensin-1 isoform X1 [Orcinus orca]	MSTRG.8524			0.986948	0.178958
Chr06_90660640_90679542	Pig.15991.1		Pig.15991	circRNA	mRNA	2	0.00323561	0.589074	0.0438617	0.225097	ChrX_42092(-0.711034365363|-0.676073102596);Chr07_20261(-0.686515938972|-0.711285243356)				Pig.15991	CD22-201	B-cell receptor CD22 [Sus scrofa]	0.999525	0.385921
Chr06_90660640_90679542	Pig.12664.1		Pig.12664	circRNA	mRNA	2	0.00164418	0.663158	0.0187366	0.169932	ChrX_42092(-0.711034365363|-0.893171247131);Chr07_20261(-0.686515938972|-0.93170020289)				Pig.12664	CCDC24-202	coiled-coil domain-containing protein 24 isoform X2 [Sus scrofa]	0.982076	0.574207
Chr06_90660640_90679542	Pig.08754.1		Pig.08754	circRNA	mRNA	2	0.00164418	0.663158	0.0187366	0.169932	Chr07_20261(-0.686515938972|-0.749563321122);ChrX_42092(-0.711034365363|-0.739055424097)				Pig.08754	HJURP-201	Holliday junction recognition protein [Sus scrofa]	0.99885	0.363501
Chr06_90660640_90679542	Pig.11889.1		Pig.11889	circRNA	mRNA	2	0.00164418	0.637479	0.0257544	0.189707	Chr07_20261(-0.686515938972|-0.748251748252);ChrX_42092(-0.711034365363|-0.776223776224)				Pig.11889	E2F1-201	transcription factor E2F1 [Sus scrofa]	0.998114	0.412667
Chr06_90660640_90679542	Pig.09123.1		Pig.09123	circRNA	mRNA	2	0.00164418	0.633976	0.0268409	0.192217	Chr07_20261(-0.686515938972|-0.671328671329);ChrX_42092(-0.711034365363|-0.65034965035)				Pig.09123	AP4M1-201	AP-4 complex subunit mu-1 isoform X2 [Sus scrofa]	0.998944	0.312786
Chr06_90660640_90679542	Pig.19820.1		Pig.19820	circRNA	mRNA	2	0.00164418	0.662567	0.0188803	0.170274	ChrX_42092(-0.711034365363|-0.726320260526);Chr07_20261(-0.686515938972|-0.828075272871)				Pig.19820	CBX2-201	chromobox protein homolog 2 isoform X1 [Sus scrofa]	0.995576	0.395997
Chr06_90660640_90679542	MSTRG.20872.1		MSTRG.20872	circRNA	mRNA	2	0.00164418	0.616463	0.032776	0.205087	ChrX_42092(-0.711034365363|-0.594405594406);Chr07_20261(-0.686515938972|-0.636363636364)				MSTRG.20872			0.99529	0.284985
Chr06_90660640_90679542	Pig.11984.1		Pig.11984	circRNA	mRNA	2	0.00323561	0.592982	0.0421372	0.223159	Chr07_20261(-0.686515938972|-0.879160717765);ChrX_42092(-0.711034365363|-0.830123864981)				Pig.11984	HTR4-204	5-hydroxytryptamine receptor 4 [Sus scrofa]	0.989445	0.604754
Chr07_52604953_52620618	MSTRG.30891.2	Pig.18733	MSTRG.30891	circRNA	mRNA	1	0.117108	0.65149	0.0217247	0.178309	mir-361:ssc-miR-361-3p(-0.718039630047|-0.811188811189)	Pig.18733	GPATCH2L-201	G patch domain-containing protein 2-like [Sus scrofa]	MSTRG.30891			0.939087	0.481902
Chr07_52604953_52620618	Pig.12620.1	Pig.18733	Pig.12620	circRNA	mRNA	1	0.0312448	0.589474	0.0436829	0.225097	Chr02_7181(-0.719298245614|-0.79298245614)	Pig.18733	GPATCH2L-201	G patch domain-containing protein 2-like [Sus scrofa]	Pig.12620	FAAH-201	fatty-acid amide hydrolase 1 [Sus scrofa]	0.951276	0.544387
Chr07_52604953_52620618	MSTRG.8524.2	Pig.18733	MSTRG.8524	circRNA	mRNA	1	0.0463686	0.703509	0.0106843	0.140815	mir-361:ssc-miR-361-3p(-0.718039630047|-0.619965924479)	Pig.18733	GPATCH2L-201	G patch domain-containing protein 2-like [Sus scrofa]	MSTRG.8524			0.926702	0.230432
Chr12_24083408_24096439	MSTRG.30891.2	Pig.11798	MSTRG.30891	circRNA	mRNA	1	0.0810916	0.811189	0.00136332	0.0864374	mir-874:ssc-miR-874(-0.664335664336|-0.783216783217)	Pig.11798	RHOT1-201	PREDICTED: mitochondrial Rho GTPase 1, partial [Manis javanica]	MSTRG.30891			0.917874	0.18528
Chr12_24083408_24096439	MSTRG.21578.1	Pig.11798	MSTRG.21578	circRNA	mRNA	1	0.0515177	0.79021	0.00222314	0.0938036	mir-874:ssc-miR-874(-0.664335664336|-0.657342657343)	Pig.11798	RHOT1-201	PREDICTED: mitochondrial Rho GTPase 1, partial [Manis javanica]	MSTRG.21578			0.994709	0.16259
Chr08_43322535_43386440	Pig.10345.1	Pig.05313	Pig.10345	circRNA	mRNA	2	0.000991841	0.6655	0.0181751	0.168318	Chr08_21314(-0.577934336379|-0.675438596491);Chr08_21313(-0.577934336379|-0.675438596491)	Pig.05313	ADGRA3-201	adhesion G protein-coupled receptor A3 isoform X1 [Sus scrofa]	Pig.10345	ZNF263-201	zinc finger protein 263 isoform X1 [Sus scrofa]	0.993948	0.208298
Chr08_43322535_43386440	Pig.19967.1	Pig.05313	Pig.19967	circRNA	mRNA	1	0.0210526	0.622378	0.0306759	0.199692	mir-486:ssc-miR-486(-0.671328671329|-0.902097902098)	Pig.05313	ADGRA3-201	adhesion G protein-coupled receptor A3 isoform X1 [Sus scrofa]	Pig.19967	CTSF-201	cathepsin F isoform X3 [Sus scrofa]	0.853333	0.569933
Chr14_41930481_41938885	MSTRG.30891.2	Pig.07715	MSTRG.30891	circRNA	mRNA	1	0.0421053	0.692308	0.012593	0.148606	mir-361:ssc-miR-361-3p(-0.58041958042|-0.811188811189)	Pig.07715	KCTD9-201	BTB/POZ domain-containing protein KCTD9 [Sus scrofa]	MSTRG.30891			0.834171	0.227214
Chr14_41930481_41938885	MSTRG.21578.1	Pig.07715	MSTRG.21578	circRNA	mRNA	1	0.0263158	0.58042	0.047856	0.23044	mir-361:ssc-miR-361-3p(-0.58041958042|-0.776223776224)	Pig.07715	KCTD9-201	BTB/POZ domain-containing protein KCTD9 [Sus scrofa]	MSTRG.21578			0.85567	0.327428
Chr18_31666003_31703354	Pig.12620.1	Pig.01383	Pig.12620	circRNA	mRNA	1	0.0312448	0.603509	0.0377332	0.216593	Chr02_7181(-0.785964912281|-0.79298245614)	Pig.01383	MDFIC-201	myoD family inhibitor domain-containing protein isoform X1 [Sus scrofa]	Pig.12620	FAAH-201	fatty-acid amide hydrolase 1 [Sus scrofa]	0.995556	0.655934
Chr18_31666003_31703354	Pig.17197.1	Pig.01383	Pig.17197	circRNA	mRNA	1	0.0463686	0.59895	0.0395981	0.218821	Chr02_7181(-0.785964912281|-0.739055424097)	Pig.01383	MDFIC-201	myoD family inhibitor domain-containing protein isoform X1 [Sus scrofa]	Pig.17197	KPTN-201	kaptin isoform X1 [Sus scrofa]	0.96924	0.555544
Chr16_62701049_62717449	Pig.20592.1	Pig.06627	Pig.20592	circRNA	mRNA	1	0.0209412	0.726094	0.00749897	0.127324	mir-361:ssc-miR-361-3p(-0.70473790759|-0.643356643357)	Pig.06627	DROSHA-201	LOW QUALITY PROTEIN: ribonuclease 3 [Sus scrofa]	Pig.20592	MFSD3-201	major facilitator superfamily domain-containing protein 3 isoform X2 [Sus scrofa]	0.954468	0.224025
Chr16_62701049_62717449	MSTRG.21578.1	Pig.06627	MSTRG.21578	circRNA	mRNA	1	0.0515177	0.654908	0.0208158	0.174251	mir-361:ssc-miR-361-3p(-0.70473790759|-0.776223776224)	Pig.06627	DROSHA-201	LOW QUALITY PROTEIN: ribonuclease 3 [Sus scrofa]	MSTRG.21578			0.95173	0.413736
Chr14_24741144_24760271	Pig.07672.1	Pig.12220	Pig.07672	circRNA	mRNA	1	0.0756323	0.700526	0.0111699	0.14423	ssc-miR-7137-3p(-0.769230769231|-0.872155453081)	Pig.12220	B3GALNT2-201	UDP-GalNAc:beta-1,3-N-acetylgalactosaminyltransferase 2 [Sus scrofa]	Pig.07672	ESPL1-201	LOW QUALITY PROTEIN: separin [Sus scrofa]	0.937294	0.605717
Chr14_24741144_24760271	Pig.14895.1	Pig.12220	Pig.14895	circRNA	mRNA	1	0.0157895	0.65035	0.0220342	0.178309	ssc-miR-7137-3p(-0.769230769231|-0.699300699301)	Pig.12220	B3GALNT2-201	UDP-GalNAc:beta-1,3-N-acetylgalactosaminyltransferase 2 [Sus scrofa]	Pig.14895	PRXL2B-201	prostamide/prostaglandin F synthase [Sus scrofa]	0.952381	0.404208
Chr06_22437131_22457804	Pig.08573.1		Pig.08573	circRNA	mRNA	1	0.0263158	0.800717	0.0017524	0.0915734	ssc-miR-1842(-0.669030674444|-0.812610703272)				Pig.08573	MIIP-201	migration and invasion-inhibitory protein [Sus scrofa]	0.903094	0.207278
Chr06_171059535_171065195	Pig.17492.1	Pig.21444	Pig.17492	circRNA	mRNA	1	0.116503	0.595447	0.0410748	0.221137	Chr02_7181(-0.823118600298|-0.731578947368)	Pig.21444	ZC3H18-201	zinc finger CCCH domain-containing protein 18 isoform X1 [Sus scrofa]	Pig.17492	TUB-201	tubby protein homolog isoform X2 [Sus scrofa]	0.941121	0.612828
Chr06_171059535_171065195	MSTRG.30891.2	Pig.21444	MSTRG.30891	circRNA	mRNA	1	0.1503	0.783217	0.00258621	0.0962432	Chr07_17502(-0.867132867133|-0.811188811189)	Pig.21444	ZC3H18-201	zinc finger CCCH domain-containing protein 18 isoform X1 [Sus scrofa]	MSTRG.30891			0.966667	0.509213
Chr06_171059535_171065195	MSTRG.18963.2	Pig.21444	MSTRG.18963	circRNA	mRNA	1	0.133704	0.587413	0.0446093	0.225097	Chr07_17502(-0.867132867133|-0.608391608392)	Pig.21444	ZC3H18-201	zinc finger CCCH domain-containing protein 18 isoform X1 [Sus scrofa]	MSTRG.18963			0.824645	0.43599
Chr06_171059535_171065195	MSTRG.17961.3	Pig.21444	MSTRG.17961	circRNA	mRNA	1	0.0210526	0.797203	0.00190037	0.0915734	Chr07_17502(-0.867132867133|-0.874125874126)	Pig.21444	ZC3H18-201	zinc finger CCCH domain-containing protein 18 isoform X1 [Sus scrofa]	MSTRG.17961			0.995984	0.635082
Chr06_171059535_171065195	Pig.09185.1	Pig.21444	Pig.09185	circRNA	mRNA	1	0.0210526	0.664336	0.0184527	0.168318	Chr02_7181(-0.823118600298|-0.612960659796)	Pig.21444	ZC3H18-201	zinc finger CCCH domain-containing protein 18 isoform X1 [Sus scrofa]	Pig.09185	ORAI2-201	PREDICTED: protein orai-2 [Lipotes vexillifer]	0.853659	0.308189
Chr06_171059535_171065195	MSTRG.16380.1	Pig.21444	MSTRG.16380	circRNA	mRNA	1	0.0414369	0.594406	0.0415215	0.221137	Chr07_17502(-0.867132867133|-0.762237762238)	Pig.21444	ZC3H18-201	zinc finger CCCH domain-containing protein 18 isoform X1 [Sus scrofa]	MSTRG.16380			0.935622	0.800842
Chr06_171059535_171065195	Pig.23430.1	Pig.21444	Pig.23430	circRNA	mRNA	1	0.0414369	0.643357	0.0240032	0.183841	Chr07_17502(-0.867132867133|-0.867132867133)	Pig.21444	ZC3H18-201	zinc finger CCCH domain-containing protein 18 isoform X1 [Sus scrofa]	Pig.23430	TK1-201	thymidine kinase, cytosolic [Sus scrofa]	1	1.08097
Chr06_171059535_171065195	Pig.11741.1	Pig.21444	Pig.11741	circRNA	mRNA	1	0.0210526	0.622378	0.0306759	0.199692	mir-425:ssc-miR-425-3p(-0.762237762238|-0.692307692308)	Pig.21444	ZC3H18-201	zinc finger CCCH domain-containing protein 18 isoform X1 [Sus scrofa]	Pig.11741	NAV3	neuron navigator 3 isoform X1 [Sus scrofa]	0.951923	0.419688
Chr06_171059535_171065195	Pig.11328.1	Pig.21444	Pig.11328	circRNA	mRNA	1	0.0210526	0.587413	0.0446093	0.225097	Chr02_7181(-0.823118600298|-0.679510674288)	Pig.21444	ZC3H18-201	zinc finger CCCH domain-containing protein 18 isoform X1 [Sus scrofa]	Pig.11328	HIST2H2BE-201	PREDICTED: histone H2B type 1-like [Propithecus coquereli]	0.904429	0.519979
Chr02_76845237_76846956	Pig.16206.1		Pig.16206	circRNA	mRNA	1	0.00526316	0.66473	0.0183584	0.168318	mir-10:ssc-miR-125a(-0.692307692308|-0.653832571283)				Pig.16206	DNMT1-202	unnamed protein product [Homo sapiens]	0.971418	0.276306
Chr06_2604907_2676026	MSTRG.30891.2	Pig.12657	MSTRG.30891	circRNA	mRNA	3	0.00492474	0.742558	0.00567053	0.119527	mir-361:ssc-miR-361-3p(-0.714536997705|-0.811188811189);mir-874:ssc-miR-874(-0.802102806247|-0.783216783217);mir-423:ssc-miR-423-5p(-0.64098171853|-0.818181818182)	Pig.12657	ERI3-203	ERI1 exoribonuclease 3 isoform X1 [Sus scrofa]	MSTRG.30891			0.999318	0.342409
Chr06_2604907_2676026	MSTRG.21578.1	Pig.12657	MSTRG.21578	circRNA	mRNA	2	0.0219816	0.672505	0.0165693	0.162623	mir-361:ssc-miR-361-3p(-0.714536997705|-0.776223776224);mir-874:ssc-miR-874(-0.802102806247|-0.657342657343)	Pig.12657	ERI3-203	ERI1 exoribonuclease 3 isoform X1 [Sus scrofa]	MSTRG.21578			0.994225	0.377517
Chr06_2604907_2676026	MSTRG.8524.2	Pig.12657	MSTRG.8524	circRNA	mRNA	1	0.143177	0.612281	0.0343222	0.207381	mir-361:ssc-miR-361-3p(-0.714536997705|-0.619965924479)	Pig.12657	ERI3-203	ERI1 exoribonuclease 3 isoform X1 [Sus scrofa]	MSTRG.8524			0.929134	0.303874
Chr01_250459825_250490265	Pig.17875.1	Pig.09625	Pig.17875	circRNA	mRNA	1	0.0210526	0.587413	0.0446093	0.225097	Chr17_39950(-0.657342657343|-0.692307692308)	Pig.09625	ARID1B-201	AT-rich interactive domain-containing protein 1B isoform X5 [Sus scrofa]	Pig.17875	ENDOG-201	endonuclease G, mitochondrial isoform X2 [Heterocephalus glaber]	0.974093	0.344068
Chr15_32091371_32109278	MSTRG.30891.2	Pig.08949	MSTRG.30891	circRNA	mRNA	1	0.0421053	0.783123	0.00259138	0.0962432	mir-361:ssc-miR-361-3p(-0.609095578402|-0.811188811189)	Pig.08949	PTPN4-201	band 4.1-like protein 5 isoform X1 [Sus scrofa]	MSTRG.30891			0.857709	0.159929
Chr15_32091371_32109278	MSTRG.21578.1	Pig.08949	MSTRG.21578	circRNA	mRNA	1	0.0263158	0.623598	0.0302549	0.199692	mir-361:ssc-miR-361-3p(-0.609095578402|-0.776223776224)	Pig.08949	PTPN4-201	band 4.1-like protein 5 isoform X1 [Sus scrofa]	MSTRG.21578			0.879358	0.321999
Chr15_32091371_32109278	MSTRG.8524.2	Pig.08949	MSTRG.8524	circRNA	mRNA	1	0.0157895	0.66101	0.0192626	0.172142	mir-361:ssc-miR-361-3p(-0.609095578402|-0.619965924479)	Pig.08949	PTPN4-201	band 4.1-like protein 5 isoform X1 [Sus scrofa]	MSTRG.8524			0.991156	0.205606
Chr10_71630399_71645283	Pig.16324.1	MSTRG.27025,Pig.05070	Pig.16324	circRNA	mRNA	1	0.0105263	0.591564	0.0427573	0.223159	ChrX_42092(-0.626776105532|-0.58041958042)	MSTRG.27025,Pig.05070	UBAP2-202	ubiquitin-associated protein 2 isoform X3 [Sus scrofa]	Pig.16324	HOOK2-202	protein Hook homolog 2 isoform X2 [Sus scrofa]	0.9616	0.232596
Chr10_71630399_71645283	Pig.08754.1	MSTRG.27025,Pig.05070	Pig.08754	circRNA	mRNA	1	0.0157895	0.60671	0.0364614	0.213363	ChrX_42092(-0.626776105532|-0.739055424097)	MSTRG.27025,Pig.05070	UBAP2-202	ubiquitin-associated protein 2 isoform X3 [Sus scrofa]	Pig.08754	HJURP-201	Holliday junction recognition protein [Sus scrofa]	0.917794	0.333349
Chr10_71630399_71645283	Pig.09123.1	MSTRG.27025,Pig.05070	Pig.09123	circRNA	mRNA	1	0.0157895	0.584522	0.045932	0.227326	ChrX_42092(-0.626776105532|-0.65034965035)	MSTRG.27025,Pig.05070	UBAP2-202	ubiquitin-associated protein 2 isoform X3 [Sus scrofa]	Pig.09123	AP4M1-201	AP-4 complex subunit mu-1 isoform X2 [Sus scrofa]	0.981542	0.285661
Chr06_2639450_2674494	Pig.17492.1	Pig.12657	Pig.17492	circRNA	mRNA	1	0.294655	0.630474	0.0279603	0.195771	Chr02_7181(-0.802102806247|-0.731578947368)	Pig.12657	ERI3-203	ERI1 exoribonuclease 3 isoform X1 [Sus scrofa]	Pig.17492	TUB-201	tubby protein homolog isoform X2 [Sus scrofa]	0.954017	0.523207
Chr06_2639450_2674494	Pig.15991.1	Pig.12657	Pig.15991	circRNA	mRNA	1	0.22455	0.739455	0.00598623	0.119527	ChrX_42092(-0.629370629371|-0.676073102596)	Pig.12657	ERI3-203	ERI1 exoribonuclease 3 isoform X1 [Sus scrofa]	Pig.15991	CD22-201	B-cell receptor CD22 [Sus scrofa]	0.964225	0.191157
Chr06_2639450_2674494	Pig.20594.1	Pig.12657	Pig.20594	circRNA	mRNA	2	0.0230965	0.597548	0.0401847	0.22081	Scaffold1533_43934(-0.676073102596|-0.68318691078);mir-423:ssc-miR-423-5p(-0.706293706294|-0.899836760121)	Pig.12657	ERI3-203	ERI1 exoribonuclease 3 isoform X1 [Sus scrofa]	Pig.20594	LRRC14-202	leucine-rich repeat-containing protein 14 [Sus scrofa]	0.992726	0.53301
Chr06_2639450_2674494	Pig.16324.1	Pig.12657	Pig.16324	circRNA	mRNA	1	0.128154	0.601399	0.0385885	0.216593	ChrX_42092(-0.629370629371|-0.58041958042)	Pig.12657	ERI3-203	ERI1 exoribonuclease 3 isoform X1 [Sus scrofa]	Pig.16324	HOOK2-202	protein Hook homolog 2 isoform X2 [Sus scrofa]	0.959538	0.228302
Chr06_2639450_2674494	Pig.12664.1	Pig.12657	Pig.12664	circRNA	mRNA	1	0.179961	0.588442	0.0441448	0.225097	ChrX_42092(-0.629370629371|-0.893171247131)	Pig.12657	ERI3-203	ERI1 exoribonuclease 3 isoform X1 [Sus scrofa]	Pig.12664	CCDC24-202	coiled-coil domain-containing protein 24 isoform X2 [Sus scrofa]	0.826737	0.513168
Chr06_2639450_2674494	MSTRG.11408.1	Pig.12657	MSTRG.11408	circRNA	mRNA	1	0.0684211	0.587413	0.0446093	0.225097	mir-486:ssc-miR-486(-0.706293706294|-0.671328671329)	Pig.12657	ERI3-203	ERI1 exoribonuclease 3 isoform X1 [Sus scrofa]	MSTRG.11408			0.974619	0.371553
Chr06_2639450_2674494	Pig.18173.1	Pig.12657	Pig.18173	circRNA	mRNA	1	0.0684211	0.594406	0.0415215	0.221137	Chr02_7181(-0.802102806247|-0.619965924479)	Pig.12657	ERI3-203	ERI1 exoribonuclease 3 isoform X1 [Sus scrofa]	Pig.18173	SLC27A3-201	long-chain fatty acid transport protein 3 isoform X1 [Sus scrofa]	0.871921	0.387117
Chr06_2639450_2674494	Pig.08828.1	Pig.12657	Pig.08828	circRNA	mRNA	1	0.179961	0.587413	0.0446093	0.225097	mir-504:ssc-miR-504(-0.692307692308|-0.657342657343)	Pig.12657	ERI3-203	ERI1 exoribonuclease 3 isoform X1 [Sus scrofa]	Pig.08828	UNC45A-201	protein unc-45 homolog A isoform X2 [Sus scrofa]	0.974093	0.344068
Chr06_2639450_2674494	Pig.11889.1	Pig.12657	Pig.11889	circRNA	mRNA	1	0.179961	0.615385	0.0331699	0.205087	ChrX_42092(-0.629370629371|-0.776223776224)	Pig.12657	ERI3-203	ERI1 exoribonuclease 3 isoform X1 [Sus scrofa]	Pig.11889	E2F1-201	transcription factor E2F1 [Sus scrofa]	0.895522	0.356467
Chr06_2639450_2674494	Pig.05975.1	Pig.12657	Pig.05975	circRNA	mRNA	2	0.00434419	0.697024	0.011761	0.145686	Chr08_21314(-0.900176511815|-0.8);Chr08_21313(-0.900176511815|-0.8)	Pig.12657	ERI3-203	ERI1 exoribonuclease 3 isoform X1 [Sus scrofa]	Pig.05975	REPS2-201	ralBP1-associated Eps domain-containing protein 2 isoform X1 [Sus scrofa]	0.996528	0.785489
Chr06_2639450_2674494	Pig.11856.1	Pig.12657	Pig.11856	circRNA	mRNA	1	0.128154	0.721542	0.00807444	0.128514	mir-423:ssc-miR-423-5p(-0.706293706294|-0.644484350871)	Pig.12657	ERI3-203	ERI1 exoribonuclease 3 isoform X1 [Sus scrofa]	Pig.11856	TP53I13-201	LOW QUALITY PROTEIN: tumor protein p53-inducible protein 13 [Sus scrofa]	0.954242	0.22948
Chr06_2639450_2674494	Pig.23396.1	Pig.12657	Pig.23396	circRNA	mRNA	1	0.179961	0.587413	0.0446093	0.225097	ChrX_42092(-0.629370629371|-0.734265734266)	Pig.12657	ERI3-203	ERI1 exoribonuclease 3 isoform X1 [Sus scrofa]	Pig.23396	FDXR-201	NADPH:adrenodoxin oxidoreductase, mitochondrial isoform X1 [Sus scrofa]	0.923077	0.349922
Chr06_2639450_2674494	Pig.18246.1	Pig.12657	Pig.18246	circRNA	mRNA	1	0.0684211	0.746061	0.00532943	0.119527	Scaffold1533_43934(-0.676073102596|-0.730168950674)	Pig.12657	ERI3-203	ERI1 exoribonuclease 3 isoform X1 [Sus scrofa]	Pig.18246	KIF26B-201	kinesin-like protein KIF26A [Sus scrofa]	0.961532	0.244698
Chr06_2639450_2674494	Pig.12673.1	Pig.12657	Pig.12673	circRNA	mRNA	2	0.00434419	0.608392	0.035806	0.209995	Chr08_21314(-0.900176511815|-0.68301330663);Chr08_21313(-0.900176511815|-0.68301330663)	Pig.12657	ERI3-203	ERI1 exoribonuclease 3 isoform X1 [Sus scrofa]	Pig.12673	HYI-202	putative hydroxypyruvate isomerase isoform X1 [Sus scrofa]	0.981185	0.628639
Chr06_2639450_2674494	Pig.15851.1	Pig.12657	Pig.15851	circRNA	mRNA	1	0.128154	0.647987	0.0226858	0.18051	mir-874:ssc-miR-874(-0.769230769231|-0.707531733022)	Pig.12657	ERI3-203	ERI1 exoribonuclease 3 isoform X1 [Sus scrofa]	Pig.15851	TRAIP-201	E3 ubiquitin-protein ligase TRAIP isoform X1 [Sus scrofa]	0.95822	0.418263
Chr06_2639450_2674494	Pig.02211.1	Pig.12657	Pig.02211	circRNA	mRNA	1	0.0684211	0.605955	0.0367585	0.213363	mir-423:ssc-miR-423-5p(-0.706293706294|-0.637479086188)	Pig.12657	ERI3-203	ERI1 exoribonuclease 3 isoform X1 [Sus scrofa]	Pig.02211	SPG21-201	maspardin isoform X1 [Sus scrofa]	0.94879	0.320477
Chr06_2639450_2674494	Pig.10345.1	Pig.12657	Pig.10345	circRNA	mRNA	3	0.000254182	0.591945	0.0425902	0.223159	Chr08_21314(-0.900176511815|-0.675438596491);Chr02_7181(-0.802102806247|-0.677192982456);Chr08_21313(-0.900176511815|-0.675438596491)	Pig.12657	ERI3-203	ERI1 exoribonuclease 3 isoform X1 [Sus scrofa]	Pig.10345	ZNF263-201	zinc finger protein 263 isoform X1 [Sus scrofa]	0.997865	0.588307
Chr06_2639450_2674494	Pig.12620.1	Pig.12657	Pig.12620	circRNA	mRNA	2	0.00434419	0.658495	0.0198921	0.173534	mir-423:ssc-miR-423-5p(-0.706293706294|-0.917689673523);Chr02_7181(-0.802102806247|-0.79298245614)	Pig.12657	ERI3-203	ERI1 exoribonuclease 3 isoform X1 [Sus scrofa]	Pig.12620	FAAH-201	fatty-acid amide hydrolase 1 [Sus scrofa]	0.991511	0.609279
Chr06_2639450_2674494	Pig.09123.1	Pig.12657	Pig.09123	circRNA	mRNA	1	0.179961	0.65035	0.0220342	0.178309	ChrX_42092(-0.629370629371|-0.65034965035)	Pig.12657	ERI3-203	ERI1 exoribonuclease 3 isoform X1 [Sus scrofa]	Pig.09123	AP4M1-201	AP-4 complex subunit mu-1 isoform X2 [Sus scrofa]	0.983607	0.242028
Chr06_2639450_2674494	Pig.11508.1	Pig.12657	Pig.11508	circRNA	mRNA	1	0.0684211	0.783217	0.00258621	0.0962432	Scaffold1533_43934(-0.676073102596|-0.711285243356)	Pig.12657	ERI3-203	ERI1 exoribonuclease 3 isoform X1 [Sus scrofa]	Pig.11508	WBP1-201	WW domain-binding protein 1 isoform X1 [Sus scrofa]	0.974619	0.19947
Chr06_2639450_2674494	Pig.17875.1	Pig.12657	Pig.17875	circRNA	mRNA	1	0.0684211	0.72028	0.00823977	0.128514	Chr17_39950(-0.636363636364|-0.692307692308)	Pig.12657	ERI3-203	ERI1 exoribonuclease 3 isoform X1 [Sus scrofa]	Pig.17875	ENDOG-201	endonuclease G, mitochondrial isoform X2 [Heterocephalus glaber]	0.957895	0.217761
Chr06_2639450_2674494	Pig.21160.1	Pig.12657	Pig.21160	circRNA	mRNA	1	0.0684211	0.693521	0.0123749	0.148606	ssc-miR-1842(-0.685314685315|-0.630473821505)	Pig.12657	ERI3-203	ERI1 exoribonuclease 3 isoform X1 [Sus scrofa]	Pig.21160	SYNPO	LOW QUALITY PROTEIN: synaptopodin [Sus scrofa]	0.958321	0.231004
Chr06_2639450_2674494	Pig.14753.1	Pig.12657	Pig.14753	circRNA	mRNA	1	0.128154	0.622378	0.0306759	0.199692	Chr02_7181(-0.802102806247|-0.732050159414)	Pig.12657	ERI3-203	ERI1 exoribonuclease 3 isoform X1 [Sus scrofa]	Pig.14753	VWCE-201	von Willebrand factor C and EGF domain-containing protein isoform X1 [Sus scrofa]	0.954338	0.53586
Chr06_2639450_2674494	Pig.10307.1	Pig.12657	Pig.10307	circRNA	mRNA	1	0.0684211	0.587413	0.0446093	0.225097	Chr02_7181(-0.802102806247|-0.66199751258)	Pig.12657	ERI3-203	ERI1 exoribonuclease 3 isoform X1 [Sus scrofa]	Pig.10307	CCNF-201	Cyclin-F [Fukomys damarensis]	0.904306	0.461355
Chr06_2639450_2674494	Pig.22659.1	Pig.12657	Pig.22659	circRNA	mRNA	1	0.179961	0.657343	0.0201855	0.173534	ChrX_42092(-0.629370629371|-0.741258741259)	Pig.12657	ERI3-203	ERI1 exoribonuclease 3 isoform X1 [Sus scrofa]	Pig.22659	GALK1-202	galactokinase [Sus scrofa]	0.918367	0.29152
Chr06_2639450_2674494	Pig.19967.1	Pig.12657	Pig.19967	circRNA	mRNA	1	0.0684211	0.65035	0.0220342	0.178309	mir-486:ssc-miR-486(-0.706293706294|-0.902097902098)	Pig.12657	ERI3-203	ERI1 exoribonuclease 3 isoform X1 [Sus scrofa]	Pig.19967	CTSF-201	cathepsin F isoform X3 [Sus scrofa]	0.878261	0.607129
Chr06_2639450_2674494	Pig.08573.1	Pig.12657	Pig.08573	circRNA	mRNA	1	0.0684211	0.676008	0.0158067	0.160844	ssc-miR-1842(-0.685314685315|-0.812610703272)	Pig.12657	ERI3-203	ERI1 exoribonuclease 3 isoform X1 [Sus scrofa]	Pig.08573	MIIP-201	migration and invasion-inhibitory protein [Sus scrofa]	0.915018	0.395362
Chr06_2639450_2674494	MSTRG.8524.2	Pig.12657	MSTRG.8524	circRNA	mRNA	1	0.179961	0.879161	0.000165104	0.0630114	Scaffold1533_43934(-0.676073102596|-0.825408379023)	Pig.12657	ERI3-203	ERI1 exoribonuclease 3 isoform X1 [Sus scrofa]	MSTRG.8524			0.900541	0.107171
Chr06_2639450_2674494	Pig.12641.1	Pig.12657	Pig.12641	circRNA	mRNA	1	0.179961	0.671329	0.0168315	0.162623	Chr02_7181(-0.802102806247|-0.707531733022)	Pig.12657	ERI3-203	ERI1 exoribonuclease 3 isoform X1 [Sus scrofa]	Pig.12641	MUTYH	adenine DNA glycosylase isoform X1 [Sus scrofa]	0.937355	0.425332
Chr11_10784978_10824218	Pig.08043.1	Pig.03525	Pig.08043	circRNA	mRNA	1	0.0105263	0.633819	0.0268907	0.192217	ssc-miR-7137-3p(-0.683115530748|-0.783216783217)	Pig.03525	CDK8-201	PREDICTED: cyclin-dependent kinase 8 isoform X1 [Capra hircus]	Pig.08043	RGS9-201	regulator of G-protein signaling 9 isoform X1 [Sus scrofa]	0.931734	0.416251
Chr02_9881151_9904656	MSTRG.28647.1	MSTRG.3627,Pig.20189	MSTRG.28647	circRNA	mRNA	1	0.00526316	0.622279	0.03071	0.199792	ssc-miR-4331-5p(-0.601518719105|-0.634608372872)	MSTRG.3627,Pig.20189	ANKHD1-205	ankyrin repeat and KH domain-containing protein 1 [Sus scrofa]	MSTRG.28647			0.973231	0.232651
Chr13_99531418_99532398	Pig.22620.1		Pig.22620	circRNA	mRNA	1	0.0368421	0.6972	0.0117306	0.145686	Chr12_28094(-0.828935765258|-0.72504489473)				Pig.22620	RGS12-201	LOW QUALITY PROTEIN: regulator of G-protein signaling 12 [Sus scrofa]	0.933145	0.447513
Chr13_99531418_99532398	MSTRG.18963.2		MSTRG.18963	circRNA	mRNA	1	0.0368421	0.75354	0.00465308	0.11488	Chr12_28094(-0.828935765258|-0.774081747514)				MSTRG.18963			0.965781	0.437607
Chr13_99531418_99532398	Pig.21446.1		Pig.21446	circRNA	mRNA	1	0.00526316	0.718328	0.00850036	0.130155	Chr12_28094(-0.828935765258|-0.86865282074)				Pig.21446	CYBA-201	cytochrome b-245 light chain isoform X1 [Sus scrofa]	0.976604	0.72457
Chr06_124537421_124559486	Pig.08043.1	Pig.16111,MSTRG.17872	Pig.08043	circRNA	mRNA	1	0.0157895	0.587413	0.0446093	0.225097	ssc-miR-7137-3p(-0.594405594406|-0.783216783217)	Pig.16111,MSTRG.17872	RYR3-201	calcium release channel, partial [Sus scrofa]	Pig.08043	RGS9-201	regulator of G-protein signaling 9 isoform X1 [Sus scrofa]	0.862944	0.343679
Chr06_124537421_124559486	Pig.10482.1	Pig.16111,MSTRG.17872	Pig.10482	circRNA	mRNA	1	0.0157895	0.718975	0.00841326	0.130084	ssc-miR-7137-3p(-0.594405594406|-0.644230107444)	Pig.16111,MSTRG.17872	RYR3-201	calcium release channel, partial [Sus scrofa]	Pig.10482	UBAP2L-204	PREDICTED: ubiquitin-associated protein 2-like isoform X4 [Pteropus vampyrus]	0.959775	0.172612
Chr03_15287140_15331615	Pig.18322.1		Pig.18322	circRNA	mRNA	1	0.0368421	0.658495	0.0198921	0.173534	Chr05_13105(-0.780863659256|-0.833880851384)				Pig.18322	SELENBP1-201	selenium-binding protein 1 isoform X1 [Sus scrofa]	0.967167	0.637185
Chr03_15287140_15331615	MSTRG.18963.2		MSTRG.18963	circRNA	mRNA	1	0.211946	0.700526	0.0111699	0.14423	Chr12_28094(-0.712280701754|-0.774081747514)				MSTRG.18963			0.958421	0.364846
Chr03_15287140_15331615	Pig.08099.1		Pig.08099	circRNA	mRNA	1	0.0368421	0.605955	0.0367585	0.213363	Chr03_7854(-0.742558056439|-0.846153846154)				Pig.08099	APEX2-201	DNA-(apurinic or apyrimidinic site) lyase 2 [Sus scrofa]	0.934793	0.668605
Chr03_15287140_15331615	Pig.21446.1		Pig.21446	circRNA	mRNA	1	0.0368421	0.686516	0.0136736	0.152823	Chr12_28094(-0.712280701754|-0.86865282074)				Pig.21446	CYBA-201	cytochrome b-245 light chain isoform X1 [Sus scrofa]	0.901089	0.491564
Chr03_15287140_15331615	MSTRG.9483.1		MSTRG.9483	circRNA	mRNA	1	0.071345	0.672505	0.0165693	0.162623	Chr02_7222(-0.759456025967|-0.697619342867)				MSTRG.9483			0.957561	0.366364
Chr03_15287140_15331615	Pig.10835.1		Pig.10835	circRNA	mRNA	1	0.161739	0.608772	0.0356589	0.209995	Chr02_7222(-0.759456025967|-0.661404191629)				Pig.10835	DISP1-201	protein dispatched homolog 1 isoform X3 [Sus scrofa]	0.930991	0.390579
Chr03_15287140_15331615	Pig.19228.1		Pig.19228	circRNA	mRNA	1	0.0368421	0.59895	0.0395981	0.218821	Chr03_7854(-0.742558056439|-0.594405594406)				Pig.19228	FRMD8-201	FERM domain-containing protein 8 isoform X1 [Sus scrofa]	0.889187	0.306405
Chr03_15287140_15331615	Pig.19810.1		Pig.19810	circRNA	mRNA	1	0.103602	0.609458	0.0353946	0.209995	Chr05_13105(-0.780863659256|-0.739616059488)				Pig.19810	RNF213	PREDICTED: LOW QUALITY PROTEIN: E3 ubiquitin-protein ligase RNF213 [Balaenoptera acutorostrata scammoni]	0.972872	0.533541
Chr03_15287140_15331615	MSTRG.12911.1		MSTRG.12911	circRNA	mRNA	1	0.0368421	0.616463	0.032776	0.205087	Chr12_28094(-0.712280701754|-0.633976453846)				MSTRG.12911			0.941836	0.312686
Chr03_15287140_15331615	Pig.06431.1		Pig.06431	circRNA	mRNA	1	0.0368421	0.625004	0.0297751	0.199692	Chr03_7854(-0.742558056439|-0.608092810551)				Pig.06431	EPHX3-201	epoxide hydrolase 3 [Sus scrofa]	0.900444	0.298778
Chr03_15287140_15331615	Pig.18714.1		Pig.18714	circRNA	mRNA	1	0.071345	0.633976	0.0268409	0.192217	Chr10_24748(-0.672505409605|-0.699300699301)				Pig.18714	P3H3-201	prolyl 3-hydroxylase 3 isoform X1 [Sus scrofa]	0.980467	0.32456
Chr03_15287140_15331615	Pig.00949.1		Pig.00949	circRNA	mRNA	1	0.0368421	0.761915	0.00397495	0.107613	Chr02_7222(-0.759456025967|-0.591432041227)				Pig.00949	EPHA3-201	PREDICTED: ephrin type-A receptor 3-like [Physeter catodon]	0.87562	0.165728
Chr03_105960945_105982265	MSTRG.30891.2	MSTRG.9694,Pig.17769	MSTRG.30891	circRNA	mRNA	1	0.117108	0.741259	0.00580115	0.119527	mir-874:ssc-miR-874(-0.727272727273|-0.783216783217)	MSTRG.9694,Pig.17769	TXNDC11-201	thioredoxin domain-containing protein 11 isoform X1 [Sus scrofa]	MSTRG.30891			0.962963	0.339028
Chr03_105960945_105982265	MSTRG.21578.1	MSTRG.9694,Pig.17769	MSTRG.21578	circRNA	mRNA	1	0.0756323	0.748252	0.00512408	0.118841	mir-874:ssc-miR-874(-0.727272727273|-0.657342657343)	MSTRG.9694,Pig.17769	TXNDC11-201	thioredoxin domain-containing protein 11 isoform X1 [Sus scrofa]	MSTRG.21578			0.949495	0.22588
Chr03_93652036_93670231	Pig.10509.1	Pig.09212	Pig.10509	circRNA	mRNA	1	0.0209412	0.713287	0.00920178	0.1336	Chr08_21275(-0.64098171853|-0.718039630047)	Pig.09212	BAZ1B-201	tyrosine-protein kinase BAZ1B [Sus scrofa]	Pig.10509	CCDC42-201	dolichol-phosphate mannosyltransferase subunit 3 [Sus scrofa]	0.943299	0.239632
Chr03_93652036_93670231	Pig.18243.1	Pig.09212	Pig.18243	circRNA	mRNA	1	0.0312448	0.588131	0.0442849	0.225097	Chr08_21275(-0.64098171853|-0.689243827105)	Pig.09212	BAZ1B-201	tyrosine-protein kinase BAZ1B [Sus scrofa]	Pig.18243	DHX57-203	putative ATP-dependent RNA helicase TDRD9 isoform X2 [Sus scrofa]	0.963719	0.324988
Chr05_44803191_44854685	Pig.20592.1	Pig.06608	Pig.20592	circRNA	mRNA	1	0.100251	0.696109	0.011919	0.147474	mir-361:ssc-miR-361-3p(-0.812127437869|-0.643356643357)	Pig.06608	DENND5B-201	DENN domain-containing protein 5B isoform X1 [Sus scrofa]	Pig.20592	MFSD3-201	major facilitator superfamily domain-containing protein 3 isoform X2 [Sus scrofa]	0.884045	0.307427
Chr05_44803191_44854685	MSTRG.30891.2	Pig.06608	MSTRG.30891	circRNA	mRNA	1	0.297537	0.746867	0.00525314	0.119527	mir-361:ssc-miR-361-3p(-0.812127437869|-0.811188811189)	Pig.06608	DENND5B-201	DENN domain-containing protein 5B isoform X1 [Sus scrofa]	MSTRG.30891			0.999422	0.488731
Chr05_44803191_44854685	MSTRG.21578.1	Pig.06608	MSTRG.21578	circRNA	mRNA	1	0.216153	0.725114	0.00762017	0.127324	mir-361:ssc-miR-361-3p(-0.812127437869|-0.776223776224)	Pig.06608	DENND5B-201	DENN domain-containing protein 5B isoform X1 [Sus scrofa]	MSTRG.21578			0.977396	0.467621
Chr05_44803191_44854685	Pig.10509.1	Pig.06608	Pig.10509	circRNA	mRNA	2	0.00250627	0.674356	0.0161631	0.162623	Chr08_21275(-0.592003611436|-0.718039630047);Chr12_28849(-0.652602405431|-0.783216783217)	Pig.06608	DENND5B-201	DENN domain-containing protein 5B isoform X1 [Sus scrofa]	Pig.10509	CCDC42-201	dolichol-phosphate mannosyltransferase subunit 3 [Sus scrofa]	0.991234	0.27892
Chr06_9016814_9038066	Pig.22141.1	Pig.14734	Pig.22141	circRNA	mRNA	1	0.0526316	0.59895	0.0395981	0.218821	mir-504:ssc-miR-504(-0.783216783217|-0.647986983213)	Pig.14734	EPS15-205	epidermal growth factor receptor substrate 15 isoform X1 [Sus scrofa]	Pig.22141	DGKQ-202	diacylglycerol kinase theta isoform X1 [Sus scrofa]	0.905513	0.405867
Chr06_9016814_9038066	Pig.08862.1	Pig.14734	Pig.08862	circRNA	mRNA	1	0.100251	0.633976	0.0268409	0.192217	Chr03_7531(-0.804195804196|-0.718039630047)	Pig.14734	EPS15-205	epidermal growth factor receptor substrate 15 isoform X1 [Sus scrofa]	Pig.08862	ADAMTSL3-202	ADAMTS-like protein 3 isoform X2 [Sus scrofa]	0.943402	0.49732
Chr06_9016814_9038066	Pig.20594.1	Pig.14734	Pig.20594	circRNA	mRNA	1	0.181715	0.713542	0.00916519	0.1336	Scaffold1533_43934(-0.718327671508|-0.68318691078)	Pig.14734	EPS15-205	epidermal growth factor receptor substrate 15 isoform X1 [Sus scrofa]	Pig.20594	LRRC14-202	leucine-rich repeat-containing protein 14 [Sus scrofa]	0.974927	0.275008
Chr06_9016814_9038066	Pig.17909.1	Pig.14734	Pig.17909	circRNA	mRNA	1	0.0526316	0.683013	0.0143594	0.155729	mir-504:ssc-miR-504(-0.783216783217|-0.644484350871)	Pig.14734	EPS15-205	epidermal growth factor receptor substrate 15 isoform X1 [Sus scrofa]	Pig.17909	PARP12-201	poly [ADP-ribose]	0.902828	0.308082
Chr06_9016814_9038066	Pig.19937.1	Pig.14734	Pig.19937	circRNA	mRNA	1	0.100251	0.622378	0.0306759	0.199692	Chr08_21275(-0.623468556821|-0.630473821505)	Pig.14734	EPS15-205	epidermal growth factor receptor substrate 15 isoform X1 [Sus scrofa]	Pig.19937	INTS5-201	LOW QUALITY PROTEIN: integrator complex subunit 5 [Sus scrofa]	0.994413	0.244548
Chr06_9016814_9038066	Pig.16028.1	Pig.14734	Pig.16028	circRNA	mRNA	1	0.181715	0.628074	0.0287463	0.198294	mir-504:ssc-miR-504(-0.783216783217|-0.63158283524)	Pig.14734	EPS15-205	epidermal growth factor receptor substrate 15 isoform X1 [Sus scrofa]	Pig.16028	WDR62-201	WD repeat-containing protein 62 [Sus scrofa]	0.892823	0.351321
Chr06_9016814_9038066	MSTRG.18963.2	Pig.14734	MSTRG.18963	circRNA	mRNA	3	0.00320038	0.692308	0.012593	0.148606	Chr03_9544(-0.741258741259|-0.874125874126);ssc-miR-1842(-0.769230769231|-0.671328671329);Chr12_28094(-0.753065953464|-0.774081747514)	Pig.14734	EPS15-205	epidermal growth factor receptor substrate 15 isoform X1 [Sus scrofa]	MSTRG.18963			0.999709	0.435622
Chr06_9016814_9038066	Pig.20585.1	Pig.14734	Pig.20585	circRNA	mRNA	1	0.143177	0.581437	0.0473736	0.23044	mir-129:ssc-miR-129a-5p(-0.923076923077|-0.598950130429),ssc-miR-129b(-0.923076923077|-0.598950130429)	Pig.14734	EPS15-205	epidermal growth factor receptor substrate 15 isoform X1 [Sus scrofa]	Pig.20585	TONSL-201	tonsoku-like protein isoform X1 [Sus scrofa]	0.954649	0.488708
Chr06_9016814_9038066	Pig.08828.1	Pig.14734	Pig.08828	circRNA	mRNA	1	0.143177	0.594406	0.0415215	0.221137	mir-504:ssc-miR-504(-0.783216783217|-0.657342657343)	Pig.14734	EPS15-205	epidermal growth factor receptor substrate 15 isoform X1 [Sus scrofa]	Pig.08828	UNC45A-201	protein unc-45 homolog A isoform X2 [Sus scrofa]	0.912621	0.424595
Chr06_9016814_9038066	Pig.18699.1	Pig.14734	Pig.18699	circRNA	mRNA	1	0.216153	0.678322	0.0153173	0.159036	mir-196:ssc-miR-196a(-0.65034965035|-0.692307692308)	Pig.14734	EPS15-205	epidermal growth factor receptor substrate 15 isoform X1 [Sus scrofa]	Pig.18699	NCAPD2-202	condensin complex subunit 1 isoform X1 [Sus scrofa]	0.96875	0.262235
Chr06_9016814_9038066	Pig.07973.1	Pig.14734	Pig.07973	circRNA	mRNA	1	0.100251	0.587413	0.0446093	0.225097	Chr03_7531(-0.804195804196|-0.699300699301)	Pig.14734	EPS15-205	epidermal growth factor receptor substrate 15 isoform X1 [Sus scrofa]	Pig.07973	TMEM94-201	transmembrane protein 94 isoform X6 [Sus scrofa]	0.930233	0.528482
Chr06_9016814_9038066	Pig.18656.1	Pig.14734	Pig.18656	circRNA	mRNA	1	0.143177	0.713287	0.00920178	0.1336	mir-504:ssc-miR-504(-0.783216783217|-0.748251748252)	Pig.14734	EPS15-205	epidermal growth factor receptor substrate 15 isoform X1 [Sus scrofa]	Pig.18656	ARRB2-201	beta-arrestin-2 isoform X3 [Sus scrofa]	0.977169	0.404801
Chr06_9016814_9038066	Pig.21446.1	Pig.14734	Pig.21446	circRNA	mRNA	1	0.0526316	0.839161	0.000642826	0.0767553	Chr12_28094(-0.753065953464|-0.86865282074)	Pig.14734	EPS15-205	epidermal growth factor receptor substrate 15 isoform X1 [Sus scrofa]	Pig.21446	CYBA-201	cytochrome b-245 light chain isoform X1 [Sus scrofa]	0.928726	0.271582
Chr06_9016814_9038066	Pig.08781.1	Pig.14734	Pig.08781	circRNA	mRNA	1	0.0526316	0.818182	0.00114311	0.0854743	Chr03_7531(-0.804195804196|-0.769230769231)	Pig.14734	EPS15-205	epidermal growth factor receptor substrate 15 isoform X1 [Sus scrofa]	Pig.08781	SEMA4B-201	semaphorin-4B [Sus scrofa]	0.977778	0.292697
Chr06_9016814_9038066	Pig.18902.1	Pig.14734	Pig.18902	circRNA	mRNA	1	0.181715	0.58042	0.047856	0.23044	Scaffold1533_43934(-0.718327671508|-0.718327671508)	Pig.14734	EPS15-205	epidermal growth factor receptor substrate 15 isoform X1 [Sus scrofa]	Pig.18902	P3H2-201	prolyl 3-hydroxylase 1 isoform X2 [Sus scrofa]	1	0.447312
Chr06_9016814_9038066	Pig.12624.1	Pig.14734	Pig.12624	circRNA	mRNA	1	0.100251	0.802103	0.00169653	0.0904396	Chr08_21275(-0.623468556821|-0.663157894737)	Pig.14734	EPS15-205	epidermal growth factor receptor substrate 15 isoform X1 [Sus scrofa]	Pig.12624	RAD54L-202	DNA repair and recombination protein RAD54-like [Sus scrofa]	0.969152	0.137977
Chr06_9016814_9038066	Pig.11482.1	Pig.14734	Pig.11482	circRNA	mRNA	1	0.0526316	0.671329	0.0168315	0.162623	mir-504:ssc-miR-504(-0.783216783217|-0.664335664336)	Pig.14734	EPS15-205	epidermal growth factor receptor substrate 15 isoform X1 [Sus scrofa]	Pig.11482	SMYD5-201	homeobox protein notochord [Sus scrofa]	0.917874	0.346378
Chr06_9016814_9038066	Pig.19812.1	Pig.14734	Pig.19812	circRNA	mRNA	2	0.00250627	0.748252	0.00512408	0.118841	Chr03_9544(-0.741258741259|-0.818181818182);Chr08_21275(-0.623468556821|-0.690018571313)	Pig.14734	EPS15-205	epidermal growth factor receptor substrate 15 isoform X1 [Sus scrofa]	Pig.19812	SGSH-201	N-sulphoglucosamine sulphohydrolase [Sus scrofa]	0.9975	0.283567
Chr06_9016814_9038066	Pig.11947.1	Pig.14734	Pig.11947	circRNA	mRNA	1	0.0526316	0.619966	0.0315202	0.201756	mir-129:ssc-miR-129a-5p(-0.923076923077|-0.591944865746),ssc-miR-129b(-0.923076923077|-0.591944865746)	Pig.14734	EPS15-205	epidermal growth factor receptor substrate 15 isoform X1 [Sus scrofa]	Pig.11947	SOX10-201	PREDICTED: transcription factor SOX-12 [Orcinus orca]	0.952229	0.382684
Chr06_9016814_9038066	MSTRG.7156.1	Pig.14734	MSTRG.7156	circRNA	mRNA	1	0.216153	0.608392	0.035806	0.209995	mir-504:ssc-miR-504(-0.783216783217|-0.643356643357)	Pig.14734	EPS15-205	epidermal growth factor receptor substrate 15 isoform X1 [Sus scrofa]	MSTRG.7156			0.901961	0.388841
Chr06_9016814_9038066	Pig.10509.1	Pig.14734	Pig.10509	circRNA	mRNA	1	0.100251	0.664336	0.0184527	0.168318	Chr08_21275(-0.623468556821|-0.718039630047)	Pig.14734	EPS15-205	epidermal growth factor receptor substrate 15 isoform X1 [Sus scrofa]	Pig.10509	CCDC42-201	dolichol-phosphate mannosyltransferase subunit 3 [Sus scrofa]	0.929504	0.266186
Chr06_9016814_9038066	Pig.18822.1	Pig.14734	Pig.18822	circRNA	mRNA	1	0.100251	0.608392	0.035806	0.209995	Chr03_7531(-0.804195804196|-0.678321678322)	Pig.14734	EPS15-205	epidermal growth factor receptor substrate 15 isoform X1 [Sus scrofa]	Pig.18822	CTC1	LOW QUALITY PROTEIN: CST complex subunit CTC1 [Sus scrofa]	0.915094	0.46439
Chr06_9016814_9038066	Pig.07425.1	Pig.14734	Pig.07425	circRNA	mRNA	1	0.100251	0.657343	0.0201855	0.173534	Chr08_21275(-0.623468556821|-0.654992247896)	Pig.14734	EPS15-205	epidermal growth factor receptor substrate 15 isoform X1 [Sus scrofa]	Pig.07425	MYBL2-201	myb-related protein B [Sus scrofa]	0.975342	0.235916
Chr06_9016814_9038066	Pig.03438.1	Pig.14734	Pig.03438	circRNA	mRNA	1	0.0526316	0.692308	0.012593	0.148606	Chr03_7531(-0.804195804196|-0.748251748252)	Pig.14734	EPS15-205	epidermal growth factor receptor substrate 15 isoform X1 [Sus scrofa]	Pig.03438	FAM124A-202	protein FAM124A [Sus scrofa]	0.963964	0.462624
Chr06_9016814_9038066	Pig.11508.1	Pig.14734	Pig.11508	circRNA	mRNA	1	0.0526316	0.727273	0.00735503	0.127324	Scaffold1533_43934(-0.718327671508|-0.711285243356)	Pig.14734	EPS15-205	epidermal growth factor receptor substrate 15 isoform X1 [Sus scrofa]	Pig.11508	WBP1-201	WW domain-binding protein 1 isoform X1 [Sus scrofa]	0.995074	0.284878
Chr06_9016814_9038066	Pig.12853.1	Pig.14734	Pig.12853	circRNA	mRNA	1	0.143177	0.629371	0.0283197	0.195771	Scaffold1533_43934(-0.718327671508|-0.61973367738)	Pig.14734	EPS15-205	epidermal growth factor receptor substrate 15 isoform X1 [Sus scrofa]	Pig.12853	SLCO2B1-201	LOW QUALITY PROTEIN: solute carrier organic anion transporter family member 2B1 [Sus scrofa]	0.926316	0.292009
Chr06_9016814_9038066	Pig.09731.1	Pig.14734	Pig.09731	circRNA	mRNA	1	0.0526316	0.626971	0.0291129	0.198294	Scaffold1533_43934(-0.718327671508|-0.709004633263)	Pig.14734	EPS15-205	epidermal growth factor receptor substrate 15 isoform X1 [Sus scrofa]	Pig.09731	IRF9-203	interferon regulatory factor 9 [Sus scrofa]	0.993468	0.387122
Chr06_9016814_9038066	Pig.19810.1	Pig.14734	Pig.19810	circRNA	mRNA	1	0.143177	0.657343	0.0201855	0.173534	mir-196:ssc-miR-196a(-0.65034965035|-0.657342657343)	Pig.14734	EPS15-205	epidermal growth factor receptor substrate 15 isoform X1 [Sus scrofa]	Pig.19810	RNF213	PREDICTED: LOW QUALITY PROTEIN: E3 ubiquitin-protein ligase RNF213 [Balaenoptera acutorostrata scammoni]	0.994652	0.255843
Chr06_9016814_9038066	Pig.01857.1	Pig.14734	Pig.01857	circRNA	mRNA	1	0.0526316	0.643357	0.0240032	0.183841	Chr03_9544(-0.741258741259|-0.832167832168)	Pig.14734	EPS15-205	epidermal growth factor receptor substrate 15 isoform X1 [Sus scrofa]	Pig.01857	SRPX-204	sushi repeat-containing protein SRPX isoform X1 [Sus scrofa]	0.942222	0.572146
Chr06_9016814_9038066	Pig.03052.1	Pig.14734	Pig.03052	circRNA	mRNA	1	0.143177	0.587413	0.0446093	0.225097	Chr03_9544(-0.741258741259|-0.839160839161)	Pig.14734	EPS15-205	epidermal growth factor receptor substrate 15 isoform X1 [Sus scrofa]	Pig.03052	MTMR9	myotubularin-related protein 9 [Sus scrofa]	0.938053	0.682252
Chr06_9016814_9038066	MSTRG.12911.1	Pig.14734	MSTRG.12911	circRNA	mRNA	1	0.0526316	0.622378	0.0306759	0.199692	Chr12_28094(-0.753065953464|-0.633976453846)	Pig.14734	EPS15-205	epidermal growth factor receptor substrate 15 isoform X1 [Sus scrofa]	MSTRG.12911			0.914141	0.337502
Chr06_9016814_9038066	Pig.21160.1	Pig.14734	Pig.21160	circRNA	mRNA	1	0.0526316	0.735553	0.00640178	0.123576	ssc-miR-1842(-0.769230769231|-0.630473821505)	Pig.14734	EPS15-205	epidermal growth factor receptor substrate 15 isoform X1 [Sus scrofa]	Pig.21160	SYNPO	LOW QUALITY PROTEIN: synaptopodin [Sus scrofa]	0.900867	0.230341
Chr06_9016814_9038066	MSTRG.43551.1	Pig.14734	MSTRG.43551	circRNA	mRNA	1	0.100251	0.65035	0.0220342	0.178309	Chr03_7531(-0.804195804196|-0.699300699301)	Pig.14734	EPS15-205	epidermal growth factor receptor substrate 15 isoform X1 [Sus scrofa]	MSTRG.43551			0.930233	0.443285
Chr06_9016814_9038066	Pig.11556.1	Pig.14734	Pig.11556	circRNA	mRNA	1	0.0315466	0.735553	0.00640178	0.123576	Scaffold1533_43934(-0.718327671508|-0.63140213609)	Pig.14734	EPS15-205	epidermal growth factor receptor substrate 15 isoform X1 [Sus scrofa]	Pig.11556	MKI67	proliferation marker protein Ki-67 isoform X9 [Sus scrofa]	0.935598	0.212837
Chr06_9016814_9038066	Pig.17175.1	Pig.14734	Pig.17175	circRNA	mRNA	1	0.100251	0.643357	0.0240032	0.183841	Scaffold1533_43934(-0.718327671508|-0.633818533684)	Pig.14734	EPS15-205	epidermal growth factor receptor substrate 15 isoform X1 [Sus scrofa]	Pig.17175	CCDC8-201	coiled-coil domain-containing protein 8 [Sus scrofa]	0.9375	0.293864
Chr06_9016814_9038066	Pig.14753.1	Pig.14734	Pig.14753	circRNA	mRNA	1	0.100251	0.594406	0.0415215	0.221137	Chr08_21275(-0.623468556821|-0.693521203655)	Pig.14734	EPS15-205	epidermal growth factor receptor substrate 15 isoform X1 [Sus scrofa]	Pig.14753	VWCE-201	von Willebrand factor C and EGF domain-containing protein isoform X1 [Sus scrofa]	0.946809	0.30677
Chr06_9016814_9038066	Pig.13747.1	Pig.14734	Pig.13747	circRNA	mRNA	1	0.0526316	0.587413	0.0446093	0.225097	Scaffold1533_43934(-0.718327671508|-0.661988246292)	Pig.14734	EPS15-205	epidermal growth factor receptor substrate 15 isoform X1 [Sus scrofa]	Pig.13747	KATNB1-201	katanin p80 WD40 repeat-containing subunit B1 isoform X2 [Sus scrofa]	0.959184	0.372838
Chr06_9016814_9038066	Pig.20058.1	Pig.14734	Pig.20058	circRNA	mRNA	1	0.0526316	0.622378	0.0306759	0.199692	Scaffold1533_43934(-0.718327671508|-0.647903389988)	Pig.14734	EPS15-205	epidermal growth factor receptor substrate 15 isoform X1 [Sus scrofa]	Pig.20058	PLEKHA4-201	LOW QUALITY PROTEIN: pleckstrin homology domain-containing family A member 4 [Sus scrofa]	0.948454	0.32617
Chr06_9016814_9038066	Pig.20407.1	Pig.14734	Pig.20407	circRNA	mRNA	1	0.0526316	0.818182	0.00114311	0.0854743	Scaffold1533_43934(-0.718327671508|-0.626776105532)	Pig.14734	EPS15-205	epidermal growth factor receptor substrate 15 isoform X1 [Sus scrofa]	Pig.20407	SLC49A3-202	major facilitator superfamily domain-containing protein 7 isoform X5 [Sus scrofa]	0.931937	0.139421
Chr06_9016814_9038066	Pig.08573.1	Pig.14734	Pig.08573	circRNA	mRNA	1	0.0526316	0.746061	0.00532943	0.119527	ssc-miR-1842(-0.769230769231|-0.812610703272)	Pig.14734	EPS15-205	epidermal growth factor receptor substrate 15 isoform X1 [Sus scrofa]	Pig.08573	MIIP-201	migration and invasion-inhibitory protein [Sus scrofa]	0.972576	0.421204
Chr06_9016814_9038066	Pig.11814.1	Pig.14734	Pig.11814	circRNA	mRNA	1	0.100251	0.58042	0.047856	0.23044	Chr03_9544(-0.741258741259|-0.867132867133)	Pig.14734	EPS15-205	epidermal growth factor receptor substrate 15 isoform X1 [Sus scrofa]	Pig.11814	NOS2-203	nitric oxide synthase, inducible isoform X1 [Sus scrofa]	0.921739	0.766919
Chr06_9016814_9038066	MSTRG.8524.2	Pig.14734	MSTRG.8524	circRNA	mRNA	1	0.143177	0.823119	0.00100495	0.0847874	Scaffold1533_43934(-0.718327671508|-0.825408379023)	Pig.14734	EPS15-205	epidermal growth factor receptor substrate 15 isoform X1 [Sus scrofa]	MSTRG.8524			0.930635	0.236983
Chr06_9016814_9038066	Pig.12641.1	Pig.14734	Pig.12641	circRNA	mRNA	1	0.143177	0.769231	0.00344645	0.103583	Chr03_9544(-0.741258741259|-0.839160839161)	Pig.14734	EPS15-205	epidermal growth factor receptor substrate 15 isoform X1 [Sus scrofa]	Pig.12641	MUTYH	adenine DNA glycosylase isoform X1 [Sus scrofa]	0.938053	0.366027
Chr06_9016814_9038066	MSTRG.12124.1	Pig.14734	MSTRG.12124	circRNA	mRNA	1	0.143177	0.678322	0.0153173	0.159036	Chr03_7531(-0.804195804196|-0.657342657343)	Pig.14734	EPS15-205	epidermal growth factor receptor substrate 15 isoform X1 [Sus scrofa]	MSTRG.12124			0.899522	0.344125
Chr01_151532417_151542472	MSTRG.18963.2	Pig.02203	MSTRG.18963	circRNA	mRNA	1	0.0368421	0.615385	0.0331699	0.205087	Chr12_28094(-0.781087012197|-0.774081747514)	Pig.02203	TCF4-206	transcription factor 4 isoform X1 [Sus scrofa]	MSTRG.18963			0.995495	0.588167
Chr10_62136486_62153648	MSTRG.18963.2	Pig.05023	MSTRG.18963	circRNA	mRNA	1	0.0368421	0.612102	0.0343893	0.207478	Chr17_39355(-0.623299234967|-0.685314685315)	Pig.05023	ZEB1-201	LOW QUALITY PROTEIN: zinc finger E-box-binding homeobox 1 [Sus scrofa]	MSTRG.18963			0.95261	0.287337
Chr13_9659551_9662950	MSTRG.18963.2	Pig.15869	MSTRG.18963	circRNA	mRNA	2	0.00664826	0.739455	0.00598623	0.119527	Chr03_9544(-0.605648821075|-0.874125874126);Chr17_39355(-0.626776105532|-0.685314685315)	Pig.15869	USP4-201	ubiquitin carboxyl-terminal hydrolase 4 isoform X1 [Sus scrofa]	MSTRG.18963			0.982546	0.194645
Chr13_9659551_9662950	Pig.03052.1	Pig.15869	Pig.03052	circRNA	mRNA	1	0.0611635	0.577479	0.0492696	0.233079	Chr03_9544(-0.605648821075|-0.839160839161)	Pig.15869	USP4-201	ubiquitin carboxyl-terminal hydrolase 4 isoform X1 [Sus scrofa]	Pig.03052	MTMR9	myotubularin-related protein 9 [Sus scrofa]	0.838379	0.417487
Chr13_9659551_9662950	Pig.11741.1	Pig.15869	Pig.11741	circRNA	mRNA	1	0.0210526	0.591564	0.0427573	0.223159	mir-425:ssc-miR-425-3p(-0.915515659765|-0.692307692308)	Pig.15869	USP4-201	ubiquitin carboxyl-terminal hydrolase 4 isoform X1 [Sus scrofa]	Pig.11741	NAV3	neuron navigator 3 isoform X1 [Sus scrofa]	0.861174	0.737125
Chr13_111232839_111236356	Pig.16206.1	Pig.15068	Pig.16206	circRNA	mRNA	1	0.00526316	0.585842	0.0453245	0.227259	mir-10:ssc-miR-125a(-0.637479086188|-0.653832571283)	Pig.15068	SENP5-201	sentrin-specific protease 5 [Sus scrofa]	Pig.16206	DNMT1-202	unnamed protein product [Homo sapiens]	0.987336	0.295881
Chr09_115661148_115667030	MSTRG.30891.2	MSTRG.25448,Pig.08122	MSTRG.30891	circRNA	mRNA	1	0.0810916	0.734266	0.00654349	0.123576	mir-361:ssc-miR-361-3p(-0.846153846154|-0.811188811189)	MSTRG.25448,Pig.08122	CEP295-201	LOW QUALITY PROTEIN: centrosomal protein of 295 kDa [Sus scrofa]	MSTRG.30891			0.978903	0.580649
Chr09_115661148_115667030	MSTRG.8524.2	MSTRG.25448,Pig.08122	MSTRG.8524	circRNA	mRNA	1	0.0312448	0.619966	0.0315202	0.201756	mir-361:ssc-miR-361-3p(-0.846153846154|-0.619965924479)	MSTRG.25448,Pig.08122	CEP295-201	LOW QUALITY PROTEIN: centrosomal protein of 295 kDa [Sus scrofa]	MSTRG.8524			0.845723	0.391872
Chr09_40294554_40366868	Pig.20592.1	Pig.00327	Pig.20592	circRNA	mRNA	1	0.0907268	0.616463	0.032776	0.205087	mir-361:ssc-miR-361-3p(-0.781087012197|-0.643356643357)	Pig.00327	CACNA2D1-201	voltage-dependent calcium channel subunit alpha-2/delta-1 isoform X5 [Sus scrofa]	Pig.20592	MFSD3-201	major facilitator superfamily domain-containing protein 3 isoform X2 [Sus scrofa]	0.903309	0.378101
Chr09_40294554_40366868	MSTRG.30891.2	Pig.00327	MSTRG.30891	circRNA	mRNA	1	0.278556	0.71804	0.00853932	0.130155	mir-361:ssc-miR-361-3p(-0.781087012197|-0.811188811189)	Pig.00327	CACNA2D1-201	voltage-dependent calcium channel subunit alpha-2/delta-1 isoform X5 [Sus scrofa]	MSTRG.30891			0.981095	0.486819
Chr09_40294554_40366868	MSTRG.21578.1	Pig.00327	MSTRG.21578	circRNA	mRNA	1	0.198934	0.781087	0.0027053	0.0972726	mir-361:ssc-miR-361-3p(-0.781087012197|-0.776223776224)	Pig.00327	CACNA2D1-201	voltage-dependent calcium channel subunit alpha-2/delta-1 isoform X5 [Sus scrofa]	MSTRG.21578			0.996877	0.337091
Chr09_40294554_40366868	Pig.14514.1	Pig.00327	Pig.14514	circRNA	mRNA	1	0.0473684	0.607018	0.036341	0.2129	Chr13_30396(-0.732050159414|-0.742558056439)	Pig.00327	CACNA2D1-201	voltage-dependent calcium channel subunit alpha-2/delta-1 isoform X5 [Sus scrofa]	Pig.14514	FAAP24-201	Fanconi anemia core complex-associated protein 24 [Sus scrofa]	0.992874	0.46801
Chr06_139927988_139942126	Pig.21160.1	MSTRG.18233,Pig.14993	Pig.21160	circRNA	mRNA	1	0.0157895	0.686363	0.013703	0.152823	ssc-miR-1842(-0.576603742574|-0.630473821505)	MSTRG.18233,Pig.14993	CHD9-201	LOW QUALITY PROTEIN: chromodomain-helicase-DNA-binding protein 9 [Sus scrofa]	Pig.21160	SYNPO	LOW QUALITY PROTEIN: synaptopodin [Sus scrofa]	0.955371	0.177315
Chr10_50761217_50794597	MSTRG.30891.2	Pig.09670	MSTRG.30891	circRNA	mRNA	1	0.117108	0.748252	0.00512408	0.118841	mir-423:ssc-miR-423-5p(-0.657342657343|-0.818181818182)	Pig.09670	MLLT10-201	protein AF-10 isoform X3 [Sus scrofa]	MSTRG.30891			0.890995	0.262599
Chr10_50761217_50794597	Pig.10509.1	Pig.09670	Pig.10509	circRNA	mRNA	1	0.0312448	0.587413	0.0446093	0.225097	Chr08_21275(-0.633976453846|-0.718039630047)	Pig.09670	MLLT10-201	protein AF-10 isoform X3 [Sus scrofa]	Pig.10509	CCDC42-201	dolichol-phosphate mannosyltransferase subunit 3 [Sus scrofa]	0.937824	0.341818
Chr08_71559017_71632364	MSTRG.30891.2	Pig.08332	MSTRG.30891	circRNA	mRNA	1	0.1503	0.671329	0.0168315	0.162623	mir-361:ssc-miR-361-3p(-0.692307692308|-0.811188811189)	Pig.08332	MTHFD2-201	PREDICTED: probable bifunctional methylenetetrahydrofolate dehydrogenase/cyclohydrolase 2 [Bos mutus]	MSTRG.30891			0.92093	0.411279
Chr08_71559017_71632364	Pig.10509.1	Pig.08332	Pig.10509	circRNA	mRNA	1	0.0414369	0.734266	0.00654349	0.123576	Chr08_21275(-0.584939601063|-0.718039630047)	Pig.08332	MTHFD2-201	PREDICTED: probable bifunctional methylenetetrahydrofolate dehydrogenase/cyclohydrolase 2 [Bos mutus]	Pig.10509	CCDC42-201	dolichol-phosphate mannosyltransferase subunit 3 [Sus scrofa]	0.897849	0.177579
Chr08_71559017_71632364	Pig.18243.1	Pig.08332	Pig.18243	circRNA	mRNA	1	0.0611635	0.716313	0.00877567	0.133	Chr08_21275(-0.584939601063|-0.689243827105)	Pig.08332	MTHFD2-201	PREDICTED: probable bifunctional methylenetetrahydrofolate dehydrogenase/cyclohydrolase 2 [Bos mutus]	Pig.18243	DHX57-203	putative ATP-dependent RNA helicase TDRD9 isoform X2 [Sus scrofa]	0.91814	0.183432
Chr08_71559017_71632364	Pig.21160.1	Pig.08332	Pig.21160	circRNA	mRNA	1	0.0210526	0.58494	0.0457391	0.227326	ssc-miR-1842(-0.65034965035|-0.630473821505)	Pig.08332	MTHFD2-201	PREDICTED: probable bifunctional methylenetetrahydrofolate dehydrogenase/cyclohydrolase 2 [Bos mutus]	Pig.21160	SYNPO	LOW QUALITY PROTEIN: synaptopodin [Sus scrofa]	0.984482	0.288297
Chr08_71559017_71632364	MSTRG.8524.2	Pig.08332	MSTRG.8524	circRNA	mRNA	1	0.0611635	0.669003	0.0173586	0.164599	mir-361:ssc-miR-361-3p(-0.692307692308|-0.619965924479)	Pig.08332	MTHFD2-201	PREDICTED: probable bifunctional methylenetetrahydrofolate dehydrogenase/cyclohydrolase 2 [Bos mutus]	MSTRG.8524			0.944873	0.245478
Chr01_85209584_85213576	Pig.22014.1	Pig.02853	Pig.22014	circRNA	mRNA	1	0.0157895	0.638228	0.0255262	0.189707	mir-361:ssc-miR-361-3p(-0.683382213421|-0.64098171853)	Pig.02853	MYO9A-201	unconventional myosin-IXa isoform X1 [Sus scrofa]	Pig.22014	RABL2B	rab-like protein 2A isoform X2 [Sus scrofa]	0.967984	0.280973
Chr17_12219923_12243444	MSTRG.30891.2	Pig.13480	MSTRG.30891	circRNA	mRNA	1	0.180804	0.644484	0.0236773	0.183841	mir-423:ssc-miR-423-5p(-0.672505409605|-0.818181818182)	Pig.13480	PSD3-201	PREDICTED: PH and SEC7 domain-containing protein 3 isoform X3 [Ovis aries musimon]	MSTRG.30891			0.902276	0.422986
Chr17_12219923_12243444	Pig.16028.1	Pig.13480	Pig.16028	circRNA	mRNA	1	0.0986861	0.592268	0.0424487	0.223159	mir-504:ssc-miR-504(-0.619965924479|-0.63158283524)	Pig.13480	PSD3-201	PREDICTED: PH and SEC7 domain-containing protein 3 isoform X3 [Ovis aries musimon]	Pig.16028	WDR62-201	WD repeat-containing protein 62 [Sus scrofa]	0.990718	0.262335
Chr17_12219923_12243444	Pig.18246.1	Pig.13480	Pig.18246	circRNA	mRNA	1	0.0263158	0.626316	0.0293323	0.198294	Scaffold1533_43934(-0.582018728798|-0.730168950674)	Pig.13480	PSD3-201	PREDICTED: PH and SEC7 domain-containing protein 3 isoform X3 [Ovis aries musimon]	Pig.18246	KIF26B-201	kinesin-like protein KIF26A [Sus scrofa]	0.887097	0.263936
Chr17_12219923_12243444	Pig.11508.1	Pig.13480	Pig.11508	circRNA	mRNA	1	0.0263158	0.633976	0.0268409	0.192217	Scaffold1533_43934(-0.582018728798|-0.711285243356)	Pig.13480	PSD3-201	PREDICTED: PH and SEC7 domain-containing protein 3 isoform X3 [Ovis aries musimon]	Pig.11508	WBP1-201	WW domain-binding protein 1 isoform X1 [Sus scrofa]	0.900049	0.24909
Chr17_12219923_12243444	Pig.20407.1	Pig.13480	Pig.20407	circRNA	mRNA	1	0.0263158	0.581437	0.0473736	0.23044	Scaffold1533_43934(-0.582018728798|-0.626776105532)	Pig.13480	PSD3-201	PREDICTED: PH and SEC7 domain-containing protein 3 isoform X3 [Ovis aries musimon]	Pig.20407	SLC49A3-202	major facilitator superfamily domain-containing protein 7 isoform X5 [Sus scrofa]	0.962974	0.239529
Chr17_12219923_12243444	Pig.08573.1	Pig.13480	Pig.08573	circRNA	mRNA	1	0.0263158	0.794737	0.00200978	0.0924511	ssc-miR-1842(-0.70402910068|-0.812610703272)	Pig.13480	PSD3-201	PREDICTED: PH and SEC7 domain-containing protein 3 isoform X3 [Ovis aries musimon]	Pig.08573	MIIP-201	migration and invasion-inhibitory protein [Sus scrofa]	0.928406	0.256831
Chr17_12219923_12243444	MSTRG.8524.2	Pig.13480	MSTRG.8524	circRNA	mRNA	1	0.0756323	0.678947	0.0151869	0.159036	Scaffold1533_43934(-0.582018728798|-0.825408379023)	Pig.13480	PSD3-201	PREDICTED: PH and SEC7 domain-containing protein 3 isoform X3 [Ovis aries musimon]	MSTRG.8524			0.827068	0.246452
Chr08_71559017_71589737	Pig.20592.1	Pig.08332	Pig.20592	circRNA	mRNA	1	0.128154	0.591564	0.0427573	0.223159	mir-361:ssc-miR-361-3p(-0.626776105532|-0.643356643357)	Pig.08332	MTHFD2-201	PREDICTED: probable bifunctional methylenetetrahydrofolate dehydrogenase/cyclohydrolase 2 [Bos mutus]	Pig.20592	MFSD3-201	major facilitator superfamily domain-containing protein 3 isoform X2 [Sus scrofa]	0.986946	0.275865
Chr08_71559017_71589737	Pig.20594.1	Pig.08332	Pig.20594	circRNA	mRNA	1	0.22455	0.584072	0.0461403	0.228252	Scaffold1533_43934(-0.58865248227|-0.68318691078)	Pig.08332	MTHFD2-201	PREDICTED: probable bifunctional methylenetetrahydrofolate dehydrogenase/cyclohydrolase 2 [Bos mutus]	Pig.20594	LRRC14-202	leucine-rich repeat-containing protein 14 [Sus scrofa]	0.925671	0.275913
Chr08_71559017_71589737	Pig.16786.1	Pig.08332	Pig.16786	circRNA	mRNA	2	0.0230965	0.694895	0.0121313	0.148606	Chr13_29068(-0.577479108467|-0.865150188398);Chr13_29067(-0.577479108467|-0.865150188398)	Pig.08332	MTHFD2-201	PREDICTED: probable bifunctional methylenetetrahydrofolate dehydrogenase/cyclohydrolase 2 [Bos mutus]	Pig.16786	TTYH1-201	protein tweety homolog 1 isoform X1 [Sus scrofa]	0.960237	0.217927
Chr08_71559017_71589737	Pig.18246.1	Pig.08332	Pig.18246	circRNA	mRNA	1	0.0684211	0.582019	0.0470993	0.23044	Scaffold1533_43934(-0.58865248227|-0.730168950674)	Pig.08332	MTHFD2-201	PREDICTED: probable bifunctional methylenetetrahydrofolate dehydrogenase/cyclohydrolase 2 [Bos mutus]	Pig.18246	KIF26B-201	kinesin-like protein KIF26A [Sus scrofa]	0.892695	0.30646
Chr08_71559017_71589737	Pig.11508.1	Pig.08332	Pig.11508	circRNA	mRNA	1	0.0684211	0.633819	0.0268907	0.192217	Scaffold1533_43934(-0.58865248227|-0.711285243356)	Pig.08332	MTHFD2-201	PREDICTED: probable bifunctional methylenetetrahydrofolate dehydrogenase/cyclohydrolase 2 [Bos mutus]	Pig.11508	WBP1-201	WW domain-binding protein 1 isoform X1 [Sus scrofa]	0.905663	0.255233
Chr08_71559017_71589737	Pig.17175.1	Pig.08332	Pig.17175	circRNA	mRNA	1	0.128154	0.75354	0.00465308	0.11488	Scaffold1533_43934(-0.58865248227|-0.633818533684)	Pig.08332	MTHFD2-201	PREDICTED: probable bifunctional methylenetetrahydrofolate dehydrogenase/cyclohydrolase 2 [Bos mutus]	Pig.17175	CCDC8-201	coiled-coil domain-containing protein 8 [Sus scrofa]	0.963053	0.145099
Chr08_71559017_71589737	MSTRG.8524.2	Pig.08332	MSTRG.8524	circRNA	mRNA	2	0.01227	0.649039	0.0223939	0.180279	Scaffold1533_43934(-0.58865248227|-0.825408379023);mir-361:ssc-miR-361-3p(-0.626776105532|-0.619965924479)	Pig.08332	MTHFD2-201	PREDICTED: probable bifunctional methylenetetrahydrofolate dehydrogenase/cyclohydrolase 2 [Bos mutus]	MSTRG.8524			0.985969	0.257269
Chr08_71559017_71589737	MSTRG.10050.1	Pig.08332	MSTRG.10050	circRNA	mRNA	1	0.128154	0.585546	0.0454601	0.227326	ssc-miR-7142-3p(-0.577479108467|-0.630473821505)	Pig.08332	MTHFD2-201	PREDICTED: probable bifunctional methylenetetrahydrofolate dehydrogenase/cyclohydrolase 2 [Bos mutus]	MSTRG.10050			0.956128	0.236075
Chr07_14957406_14970337	MSTRG.18963.2	MSTRG.19316,Pig.06792	MSTRG.18963	circRNA	mRNA	1	0.0368421	0.577934	0.0490488	0.233043	ssc-miR-1842(-0.777584379856|-0.671328671329)	MSTRG.19316,Pig.06792	RANBP9-201	PREDICTED: ran-binding protein 9 [Odobenus rosmarus divergens]	MSTRG.18963			0.926665	0.457942
Chr07_14957406_14970337	Pig.08573.1	MSTRG.19316,Pig.06792	Pig.08573	circRNA	mRNA	1	0.00526316	0.638596	0.0254146	0.189707	ssc-miR-1842(-0.777584379856|-0.812610703272)	MSTRG.19316,Pig.06792	RANBP9-201	PREDICTED: ran-binding protein 9 [Odobenus rosmarus divergens]	Pig.08573	MIIP-201	migration and invasion-inhibitory protein [Sus scrofa]	0.977974	0.62025
Chr15_55572130_55590845	MSTRG.18963.2	Pig.02646	MSTRG.18963	circRNA	mRNA	1	0.103602	0.619734	0.0316024	0.20192	Chr12_28094(-0.751333268085|-0.774081747514)	Pig.02646	GSR-201	glutathione reductase, mitochondrial [Sus scrofa]	MSTRG.18963			0.985087	0.528443
Chr15_55572130_55590845	Pig.21446.1	Pig.02646	Pig.21446	circRNA	mRNA	1	0.0157895	0.661988	0.0190217	0.170274	Chr12_28094(-0.751333268085|-0.86865282074)	Pig.02646	GSR-201	glutathione reductase, mitochondrial [Sus scrofa]	Pig.21446	CYBA-201	cytochrome b-245 light chain isoform X1 [Sus scrofa]	0.92758	0.633419
Chr15_55572130_55590845	MSTRG.30061.2	Pig.02646	MSTRG.30061	circRNA	mRNA	1	0.0756323	0.804244	0.00161292	0.0904396	Chr11_26361(-0.6901579589|-0.676008041947)	Pig.02646	GSR-201	glutathione reductase, mitochondrial [Sus scrofa]	MSTRG.30061			0.989643	0.170985
Chr15_55572130_55590845	Pig.00949.1	Pig.02646	Pig.00949	circRNA	mRNA	1	0.0157895	0.602837	0.038004	0.216593	Chr02_7222(-0.598600914454|-0.591432041227)	Pig.02646	GSR-201	glutathione reductase, mitochondrial [Sus scrofa]	Pig.00949	EPHA3-201	PREDICTED: ephrin type-A receptor 3-like [Physeter catodon]	0.993976	0.217647
Chr01_147821468_147848845	Pig.15991.1	Pig.02228	Pig.15991	circRNA	mRNA	1	0.116503	0.704243	0.0105672	0.139892	ChrX_42092(-0.629370629371|-0.676073102596)	Pig.02228	USP3-203	ubiquitin carboxyl-terminal hydrolase 3 isoform X1 [Sus scrofa]	Pig.15991	CD22-201	B-cell receptor CD22 [Sus scrofa]	0.964225	0.21744
Chr01_147821468_147848845	Pig.12664.1	Pig.02228	Pig.12664	circRNA	mRNA	1	0.0897776	0.59895	0.0395981	0.218821	ChrX_42092(-0.629370629371|-0.893171247131)	Pig.02228	USP3-203	ubiquitin carboxyl-terminal hydrolase 3 isoform X1 [Sus scrofa]	Pig.12664	CCDC24-202	coiled-coil domain-containing protein 24 isoform X2 [Sus scrofa]	0.826737	0.493609
Chr01_147821468_147848845	Pig.19937.1	Pig.02228	Pig.19937	circRNA	mRNA	1	0.0614871	0.601399	0.0385885	0.216593	Chr08_21275(-0.795097541564|-0.630473821505)	Pig.02228	USP3-203	ubiquitin carboxyl-terminal hydrolase 3 isoform X1 [Sus scrofa]	Pig.19937	INTS5-201	LOW QUALITY PROTEIN: integrator complex subunit 5 [Sus scrofa]	0.884521	0.38874
Chr01_147821468_147848845	Pig.17042.1	Pig.02228	Pig.17042	circRNA	mRNA	1	0.0897776	0.594406	0.0415215	0.221137	ChrX_42092(-0.629370629371|-0.748251748252)	Pig.02228	USP3-203	ubiquitin carboxyl-terminal hydrolase 3 isoform X1 [Sus scrofa]	Pig.17042	C1QTNF6-201	complement C1q tumor necrosis factor-related protein 6 precursor [Sus scrofa]	0.913706	0.354895
Chr01_147821468_147848845	Pig.00221.1	Pig.02228	Pig.00221	circRNA	mRNA	1	0.0315789	0.733212	0.00666123	0.123576	Chr02_5821(-0.734265734266|-0.822194225522)	Pig.02228	USP3-203	ubiquitin carboxyl-terminal hydrolase 3 isoform X1 [Sus scrofa]	Pig.00221	SCN3A-201	sodium channel protein type 3 subunit alpha isoform X6 [Sus scrofa]	0.943507	0.398071
Chr01_147821468_147848845	Pig.14877.1	Pig.02228	Pig.14877	circRNA	mRNA	1	0.0315789	0.58494	0.0457391	0.227326	Chr02_5821(-0.734265734266|-0.777584379856)	Pig.02228	USP3-203	ubiquitin carboxyl-terminal hydrolase 3 isoform X1 [Sus scrofa]	Pig.14877	CHD5-201	chromodomain-helicase-DNA-binding protein 5 isoform X5 [Sus scrofa]	0.971347	0.552174
Chr01_147821468_147848845	Pig.15851.1	Pig.02228	Pig.15851	circRNA	mRNA	1	0.0614871	0.612961	0.0340673	0.207077	Chr02_5821(-0.734265734266|-0.749563321122)	Pig.02228	USP3-203	ubiquitin carboxyl-terminal hydrolase 3 isoform X1 [Sus scrofa]	Pig.15851	TRAIP-201	E3 ubiquitin-protein ligase TRAIP isoform X1 [Sus scrofa]	0.98969	0.473692
Chr01_147821468_147848845	Pig.10642.1	Pig.02228	Pig.10642	circRNA	mRNA	1	0.0897776	0.601399	0.0385885	0.216593	ChrX_42092(-0.629370629371|-0.622377622378)	Pig.02228	USP3-203	ubiquitin carboxyl-terminal hydrolase 3 isoform X1 [Sus scrofa]	Pig.10642	IGSF8-201	immunoglobulin superfamily member 8 [Sus scrofa]	0.994413	0.256654
Chr01_147821468_147848845	Pig.14514.1	Pig.02228	Pig.14514	circRNA	mRNA	1	0.0315789	0.581437	0.0473736	0.23044	Chr13_30396(-0.713286713287|-0.742558056439)	Pig.02228	USP3-203	ubiquitin carboxyl-terminal hydrolase 3 isoform X1 [Sus scrofa]	Pig.14514	FAAP24-201	Fanconi anemia core complex-associated protein 24 [Sus scrofa]	0.979894	0.471133
Chr01_147821468_147848845	Pig.10509.1	Pig.02228	Pig.10509	circRNA	mRNA	1	0.0614871	0.769231	0.00344645	0.103583	Chr08_21275(-0.795097541564|-0.718039630047)	Pig.02228	USP3-203	ubiquitin carboxyl-terminal hydrolase 3 isoform X1 [Sus scrofa]	Pig.10509	CCDC42-201	dolichol-phosphate mannosyltransferase subunit 3 [Sus scrofa]	0.949074	0.299405
Chr01_147821468_147848845	Pig.18243.1	Pig.02228	Pig.18243	circRNA	mRNA	1	0.0897776	0.588131	0.0442849	0.225097	Chr08_21275(-0.795097541564|-0.689243827105)	Pig.02228	USP3-203	ubiquitin carboxyl-terminal hydrolase 3 isoform X1 [Sus scrofa]	Pig.18243	DHX57-203	putative ATP-dependent RNA helicase TDRD9 isoform X2 [Sus scrofa]	0.928686	0.496839
Chr01_147821468_147848845	Pig.07964.1	Pig.02228	Pig.07964	circRNA	mRNA	1	0.0614871	0.656144	0.0204939	0.174251	Chr13_30396(-0.713286713287|-0.754390608759)	Pig.02228	USP3-203	ubiquitin carboxyl-terminal hydrolase 3 isoform X1 [Sus scrofa]	Pig.07964	MYO16	LOW QUALITY PROTEIN: unconventional myosin-XVI [Sus scrofa]	0.971994	0.399559
Chr01_147821468_147848845	MSTRG.15722.1	Pig.02228	MSTRG.15722	circRNA	mRNA	1	0.141714	0.591945	0.0425902	0.223159	ChrX_42092(-0.629370629371|-0.714536997705)	Pig.02228	USP3-203	ubiquitin carboxyl-terminal hydrolase 3 isoform X1 [Sus scrofa]	MSTRG.15722			0.936628	0.330318
Chr01_147821468_147848845	Pig.17713.1	Pig.02228	Pig.17713	circRNA	mRNA	1	0.141714	0.58246	0.0468921	0.23044	Chr13_30396(-0.713286713287|-0.785969750521)	Pig.02228	USP3-203	ubiquitin carboxyl-terminal hydrolase 3 isoform X1 [Sus scrofa]	Pig.17713	FBN3-203	fibrillin-3 [Sus scrofa]	0.951521	0.532063
Chr01_147821468_147848845	MSTRG.30061.2	Pig.02228	MSTRG.30061	circRNA	mRNA	1	0.141714	0.647987	0.0226858	0.18051	Chr08_21275(-0.795097541564|-0.722807017544)	Pig.02228	USP3-203	ubiquitin carboxyl-terminal hydrolase 3 isoform X1 [Sus scrofa]	MSTRG.30061			0.952375	0.473128
Chr01_147821468_147848845	Pig.22659.1	Pig.02228	Pig.22659	circRNA	mRNA	1	0.0897776	0.629371	0.0283197	0.195771	ChrX_42092(-0.629370629371|-0.741258741259)	Pig.02228	USP3-203	ubiquitin carboxyl-terminal hydrolase 3 isoform X1 [Sus scrofa]	Pig.22659	GALK1-202	galactokinase [Sus scrofa]	0.918367	0.317174
Chr01_147821468_147848845	Pig.11984.1	Pig.02228	Pig.11984	circRNA	mRNA	1	0.116503	0.581437	0.0473736	0.23044	ChrX_42092(-0.629370629371|-0.830123864981)	Pig.02228	USP3-203	ubiquitin carboxyl-terminal hydrolase 3 isoform X1 [Sus scrofa]	Pig.11984	HTR4-204	5-hydroxytryptamine receptor 4 [Sus scrofa]	0.86245	0.445315
Chr01_147821468_147848845	Pig.06349.1	Pig.02228	Pig.06349	circRNA	mRNA	1	0.116503	0.690019	0.0130122	0.149599	Chr13_30396(-0.713286713287|-0.756568585805)	Pig.02228	USP3-203	ubiquitin carboxyl-terminal hydrolase 3 isoform X1 [Sus scrofa]	Pig.06349	PIK3R2	phosphatidylinositol 3-kinase regulatory subunit beta [Sus scrofa]	0.970554	0.361926
Chr09_134635583_134640111	MSTRG.34975.2	Pig.10238	MSTRG.34975	circRNA	mRNA	1	0.0157895	0.592601	0.0423034	0.223159	Chr12_28849(-0.739454955964|-0.728547527072)	Pig.10238	PAK1-202	PREDICTED: serine/threonine-protein kinase PAK 1 [Ceratotherium simum simum]	MSTRG.34975			0.99257	0.475776
Chr09_134635583_134640111	Pig.12624.1	Pig.10238	Pig.12624	circRNA	mRNA	1	0.0312448	0.617293	0.0324755	0.205087	Chr08_21275(-0.694895088323|-0.663157894737)	Pig.10238	PAK1-202	PREDICTED: serine/threonine-protein kinase PAK 1 [Ceratotherium simum simum]	Pig.12624	RAD54L-202	DNA repair and recombination protein RAD54-like [Sus scrofa]	0.97663	0.326591
Chr09_134635583_134640111	Pig.20023.1	Pig.10238	Pig.20023	circRNA	mRNA	1	0.0157895	0.6972	0.0117306	0.145686	Chr12_28849(-0.739454955964|-0.685314685315)	Pig.10238	PAK1-202	PREDICTED: serine/threonine-protein kinase PAK 1 [Ceratotherium simum simum]	Pig.20023	MYADML2-201	myeloid-associated differentiation marker-like protein 2 [Sus scrofa]	0.962001	0.308752
Chr09_134635583_134640111	Pig.19812.1	Pig.10238	Pig.19812	circRNA	mRNA	1	0.0312448	0.577479	0.0492696	0.233079	Chr08_21275(-0.694895088323|-0.690018571313)	Pig.10238	PAK1-202	PREDICTED: serine/threonine-protein kinase PAK 1 [Ceratotherium simum simum]	Pig.19812	SGSH-201	N-sulphoglucosamine sulphohydrolase [Sus scrofa]	0.996479	0.389216
Chr09_134635583_134640111	MSTRG.34668.1	Pig.10238	MSTRG.34668	circRNA	mRNA	1	0.0157895	0.723404	0.00783515	0.128514	Chr12_28849(-0.739454955964|-0.721848885584)	Pig.10238	PAK1-202	PREDICTED: serine/threonine-protein kinase PAK 1 [Ceratotherium simum simum]	MSTRG.34668			0.987952	0.31638
Chr09_134635583_134640111	Pig.10509.1	Pig.10238	Pig.10509	circRNA	mRNA	2	0.000167084	0.619734	0.0316024	0.20192	Chr08_21275(-0.694895088323|-0.718039630047);Chr12_28849(-0.739454955964|-0.783216783217)	Pig.10238	PAK1-202	PREDICTED: serine/threonine-protein kinase PAK 1 [Ceratotherium simum simum]	Pig.10509	CCDC42-201	dolichol-phosphate mannosyltransferase subunit 3 [Sus scrofa]	0.999453	0.450608
Chr09_134635583_134640111	Pig.15616.1	Pig.10238	Pig.15616	circRNA	mRNA	1	0.0157895	0.612691	0.0341681	0.207077	Chr12_28849(-0.739454955964|-0.776223776224)	Pig.10238	PAK1-202	PREDICTED: serine/threonine-protein kinase PAK 1 [Ceratotherium simum simum]	Pig.15616	SNX17-201	PREDICTED: sorting nexin-17 isoform X1 [Trichechus manatus latirostris]	0.975741	0.521489
Chr09_134635583_134640111	Pig.12644.1	Pig.10238	Pig.12644	circRNA	mRNA	1	0.0157895	0.584522	0.045932	0.227326	Chr12_28849(-0.739454955964|-0.804195804196)	Pig.10238	PAK1-202	PREDICTED: serine/threonine-protein kinase PAK 1 [Ceratotherium simum simum]	Pig.12644	UROD-201	uroporphyrinogen decarboxylase [Sus scrofa]	0.95806	0.609876
Chr09_134635583_134640111	Pig.09306.1	Pig.10238	Pig.09306	circRNA	mRNA	1	0.0463686	0.589074	0.0438617	0.225097	Chr12_28849(-0.739454955964|-0.858144923714)	Pig.10238	PAK1-202	PREDICTED: serine/threonine-protein kinase PAK 1 [Ceratotherium simum simum]	Pig.09306	PTK7-201	inactive tyrosine-protein kinase 7 [Sus scrofa]	0.925707	0.720677
Chr09_134635583_134640111	MSTRG.10050.1	Pig.10238	MSTRG.10050	circRNA	mRNA	1	0.0312448	0.596128	0.0407848	0.221137	Chr12_28849(-0.739454955964|-0.718039630047)	Pig.10238	PAK1-202	PREDICTED: serine/threonine-protein kinase PAK 1 [Ceratotherium simum simum]	MSTRG.10050			0.985307	0.45704
Chr06_95232929_95233559	Pig.06432.1		Pig.06432	circRNA	mRNA	1	0.0105263	0.626776	0.0291781	0.198294	mir-181:ssc-miR-181b(-0.683115530748|-0.608391608392)				Pig.06432	NOTCH3-201	neurogenic locus notch homolog protein 3 [Sus scrofa]	0.942142	0.262432
Chr17_22340630_22366999	Pig.20594.1	Pig.08668	Pig.20594	circRNA	mRNA	1	0.0986861	0.760404	0.00409137	0.107713	Chr05_11955(-0.785862799899|-0.817595411794)	Pig.08668	KIF16B	kinesin-like protein KIF16B isoform X7 [Sus scrofa]	Pig.20594	LRRC14-202	leucine-rich repeat-containing protein 14 [Sus scrofa]	0.98021	0.429328
Chr17_22340630_22366999	MSTRG.18963.2	Pig.08668	MSTRG.18963	circRNA	mRNA	1	0.161739	0.592648	0.0422829	0.223159	Chr05_11955(-0.785862799899|-0.608637283828)	Pig.08668	KIF16B	kinesin-like protein KIF16B isoform X7 [Sus scrofa]	MSTRG.18963			0.872911	0.359614
Chr17_22340630_22366999	MSTRG.27072.1	Pig.08668	MSTRG.27072	circRNA	mRNA	1	0.0263158	0.62384	0.030172	0.199692	Chr05_11955(-0.785862799899|-0.72609360176)	Pig.08668	KIF16B	kinesin-like protein KIF16B isoform X7 [Sus scrofa]	MSTRG.27072			0.960469	0.498655
Chr17_22340630_22366999	Pig.20803.1	Pig.08668	Pig.20803	circRNA	mRNA	1	0.0263158	0.58485	0.0457805	0.227326	Chr02_6753(-0.620395465374|-0.577479108467)	Pig.08668	KIF16B	kinesin-like protein KIF16B isoform X7 [Sus scrofa]	Pig.20803	PNPLA2-201	patatin-like phospholipase domain-containing 2 [Sus scrofa]	0.964173	0.230976
Chr17_22340630_22366999	Pig.16362.1	Pig.08668	Pig.16362	circRNA	mRNA	1	0.0515177	0.577052	0.0494774	0.23365	Chr09_23263(-0.787597692136|-0.643356643357)	Pig.08668	KIF16B	kinesin-like protein KIF16B isoform X7 [Sus scrofa]	Pig.16362	Hps6	Hermansky-Pudlak syndrome 6 protein [Sus scrofa]	0.899199	0.427931
Chr17_22340630_22366999	Pig.18159.1	Pig.08668	Pig.18159	circRNA	mRNA	1	0.0263158	0.616042	0.0329296	0.205087	Chr05_11955(-0.785862799899|-0.694060060506)	Pig.08668	KIF16B	kinesin-like protein KIF16B isoform X7 [Sus scrofa]	Pig.18159	S100A6-201	protein S100-A6 isoform X1 [Sus scrofa]	0.937968	0.457447
Chr17_22340630_22366999	Pig.09740.1	Pig.08668	Pig.09740	circRNA	mRNA	1	0.0756323	0.620282	0.0314085	0.201756	Chr05_13105(-0.687296583476|-0.666671342519)	Pig.08668	KIF16B	kinesin-like protein KIF16B isoform X7 [Sus scrofa]	Pig.09740	CARMIL3-201	LOW QUALITY PROTEIN: capping protein, Arp2/3 and myosin-I linker protein 3 [Sus scrofa]	0.984767	0.320911
Chr07_39089787_39101041	Pig.20594.1	Pig.12037	Pig.20594	circRNA	mRNA	1	0.1503	0.732745	0.006714	0.123576	Scaffold1533_43934(-0.595744680851|-0.68318691078)	Pig.12037	TTC7B-201	tetratricopeptide repeat protein 7B isoform X1 [Sus scrofa]	Pig.20594	LRRC14-202	leucine-rich repeat-containing protein 14 [Sus scrofa]	0.931629	0.177361
Chr07_39089787_39101041	Pig.08781.1	Pig.12037	Pig.08781	circRNA	mRNA	1	0.0421053	0.676073	0.0157928	0.160844	Chr03_7531(-0.598606392923|-0.769230769231)	Pig.12037	TTC7B-201	tetratricopeptide repeat protein 7B isoform X1 [Sus scrofa]	Pig.08781	SEMA4B-201	semaphorin-4B [Sus scrofa]	0.87526	0.254838
Chr07_39089787_39101041	Pig.18246.1	Pig.12037	Pig.18246	circRNA	mRNA	1	0.0421053	0.585546	0.0454601	0.227326	Scaffold1533_43934(-0.595744680851|-0.730168950674)	Pig.12037	TTC7B-201	tetratricopeptide repeat protein 7B isoform X1 [Sus scrofa]	Pig.18246	KIF26B-201	kinesin-like protein KIF26A [Sus scrofa]	0.898618	0.311208
Chr07_39089787_39101041	Pig.10509.1	Pig.12037	Pig.10509	circRNA	mRNA	1	0.0810916	0.676073	0.0157928	0.160844	Chr12_28849(-0.626776105532|-0.783216783217)	Pig.12037	TTC7B-201	tetratricopeptide repeat protein 7B isoform X1 [Sus scrofa]	Pig.10509	CCDC42-201	dolichol-phosphate mannosyltransferase subunit 3 [Sus scrofa]	0.889049	0.293855
Chr07_39089787_39101041	Pig.15616.1	Pig.12037	Pig.15616	circRNA	mRNA	1	0.0421053	0.760582	0.00407753	0.107613	Chr12_28849(-0.626776105532|-0.776223776224)	Pig.12037	TTC7B-201	tetratricopeptide repeat protein 7B isoform X1 [Sus scrofa]	Pig.15616	SNX17-201	PREDICTED: sorting nexin-17 isoform X1 [Trichechus manatus latirostris]	0.89348	0.202694
Chr07_39089787_39101041	Pig.11508.1	Pig.12037	Pig.11508	circRNA	mRNA	1	0.0421053	0.746497	0.00528802	0.119527	Scaffold1533_43934(-0.595744680851|-0.711285243356)	Pig.12037	TTC7B-201	tetratricopeptide repeat protein 7B isoform X1 [Sus scrofa]	Pig.11508	WBP1-201	WW domain-binding protein 1 isoform X1 [Sus scrofa]	0.911601	0.174802
Chr07_39089787_39101041	Pig.17130.1	Pig.12037	Pig.17130	circRNA	mRNA	1	0.0421053	0.584522	0.045932	0.227326	mir-28:ssc-miR-151-5p(-0.739454955964|-0.713286713287)	Pig.12037	TTC7B-201	tetratricopeptide repeat protein 7B isoform X1 [Sus scrofa]	Pig.17130	NADSYN1	glutamine-dependent NAD(+) synthetase isoform X1 [Sus scrofa]	0.981987	0.46355
Chr07_39089787_39101041	Pig.00276.1	Pig.12037	Pig.00276	circRNA	mRNA	2	0.00155945	0.6972	0.0117306	0.145686	Chr17_38858(-0.635307344151|-0.783122886517);Chr17_38857(-0.635307344151|-0.783122886517)	Pig.12037	TTC7B-201	tetratricopeptide repeat protein 7B isoform X1 [Sus scrofa]	Pig.00276	SFT2D3-201	vesicle transport protein SFT2C [Sus scrofa]	0.98914	0.281417
Chr07_39089787_39101041	Pig.08573.1	Pig.12037	Pig.08573	circRNA	mRNA	1	0.0421053	0.747806	0.00516538	0.119451	ssc-miR-1842(-0.894388375309|-0.812610703272)	Pig.12037	TTC7B-201	tetratricopeptide repeat protein 7B isoform X1 [Sus scrofa]	Pig.08573	MIIP-201	migration and invasion-inhibitory protein [Sus scrofa]	0.952093	0.667186
Chr07_39089787_39101041	Pig.16377.1	Pig.12037	Pig.16377	circRNA	mRNA	1	0.0421053	0.598606	0.0397413	0.218822	Chr12_28849(-0.626776105532|-0.692307692308)	Pig.12037	TTC7B-201	tetratricopeptide repeat protein 7B isoform X1 [Sus scrofa]	Pig.16377	LZTS2-201	PREDICTED: leucine zipper putative tumor suppressor 2 isoform X1 [Equus caballus]	0.95032	0.305715
Chr07_39089787_39101041	MSTRG.8524.2	Pig.12037	MSTRG.8524	circRNA	mRNA	1	0.117108	0.835991	0.000704749	0.0778493	Scaffold1533_43934(-0.595744680851|-0.825408379023)	Pig.12037	TTC7B-201	tetratricopeptide repeat protein 7B isoform X1 [Sus scrofa]	MSTRG.8524			0.838396	0.0767444
ChrX_94764251_94789821	Pig.09495.1	Pig.02450,MSTRG.42159	Pig.09495	circRNA	mRNA	1	0.155054	0.783217	0.00258621	0.0962432	Chr03_7531(-0.846153846154|-0.671328671329)	Pig.02450,MSTRG.42159	AMOT-201	angiomotin isoform X1 [Sus scrofa]	Pig.09495	HSPA12B-202	heat shock 70 kDa protein 12B isoform X2 [Sus scrofa]	0.884793	0.238474
ChrX_94764251_94789821	Pig.20592.1	Pig.02450,MSTRG.42159	Pig.20592	circRNA	mRNA	1	0.155054	0.622378	0.0306759	0.199692	Chr10_25226(-0.657342657343|-0.65034965035)	Pig.02450,MSTRG.42159	AMOT-201	angiomotin isoform X1 [Sus scrofa]	Pig.20592	MFSD3-201	major facilitator superfamily domain-containing protein 3 isoform X2 [Sus scrofa]	0.994652	0.281958
ChrX_94764251_94789821	Pig.05717.1	Pig.02450,MSTRG.42159	Pig.05717	circRNA	mRNA	2	0.0343355	0.744756	0.00545465	0.119527	Chr12_28849(-0.853146853147|-0.631269181725);Chr05_13105(-0.862885402736|-0.772246730814)	Pig.02450,MSTRG.42159	AMOT-201	angiomotin isoform X1 [Sus scrofa]	Pig.05717	SLC5A1	sodium/glucose cotransporter 1-like isoform X1 [Sus scrofa]	0.987293	0.367865
ChrX_94764251_94789821	MSTRG.19396.1	Pig.02450,MSTRG.42159	MSTRG.19396	circRNA	mRNA	1	0.262476	0.622378	0.0306759	0.199692	Chr12_28849(-0.853146853147|-0.587412587413)	Pig.02450,MSTRG.42159	AMOT-201	angiomotin isoform X1 [Sus scrofa]	MSTRG.19396			0.815534	0.33523
ChrX_94764251_94789821	Pig.16949.1	Pig.02450,MSTRG.42159	Pig.16949	circRNA	mRNA	1	0.155054	0.664336	0.0184527	0.168318	Chr11_26361(-0.839160839161|-0.594405594406)	Pig.02450,MSTRG.42159	AMOT-201	angiomotin isoform X1 [Sus scrofa]	Pig.16949	ARAP3-201	arf-GAP with Rho-GAP domain, ANK repeat and PH domain-containing protein 3 isoform X6 [Sus scrofa]	0.829268	0.285862
ChrX_94764251_94789821	Pig.22141.1	Pig.02450,MSTRG.42159	Pig.22141	circRNA	mRNA	1	0.0842105	0.819616	0.00110155	0.0854743	mir-504:ssc-miR-504(-0.769230769231|-0.647986983213)	Pig.02450,MSTRG.42159	AMOT-201	angiomotin isoform X1 [Sus scrofa]	Pig.22141	DGKQ-202	diacylglycerol kinase theta isoform X1 [Sus scrofa]	0.914449	0.159698
ChrX_94764251_94789821	Pig.08862.1	Pig.02450,MSTRG.42159	Pig.08862	circRNA	mRNA	1	0.155054	0.749563	0.00500405	0.118841	Chr03_7531(-0.846153846154|-0.718039630047)	Pig.02450,MSTRG.42159	AMOT-201	angiomotin isoform X1 [Sus scrofa]	Pig.08862	ADAMTSL3-202	ADAMTS-like protein 3 isoform X2 [Sus scrofa]	0.918096	0.366762
ChrX_94764251_94789821	Pig.20594.1	Pig.02450,MSTRG.42159	Pig.20594	circRNA	mRNA	1	0.262476	0.959592	7.9275e-07	0.00849431	Chr05_11955(-0.697619342867|-0.817595411794)	Pig.02450,MSTRG.42159	AMOT-201	angiomotin isoform X1 [Sus scrofa]	Pig.20594	LRRC14-202	leucine-rich repeat-containing protein 14 [Sus scrofa]	0.920819	0.0161113
ChrX_94764251_94789821	Pig.06366.1	Pig.02450,MSTRG.42159	Pig.06366	circRNA	mRNA	1	0.155054	0.783217	0.00258621	0.0962432	Chr17_39355(-0.643356643357|-0.587412587413)	Pig.02450,MSTRG.42159	AMOT-201	angiomotin isoform X1 [Sus scrofa]	Pig.06366	SLC27A1-204	long-chain fatty acid transport protein 1 isoform X1 [Sus scrofa]	0.954545	0.129045
ChrX_94764251_94789821	Pig.17909.1	Pig.02450,MSTRG.42159	Pig.17909	circRNA	mRNA	1	0.0842105	0.644484	0.0236773	0.183841	mir-504:ssc-miR-504(-0.769230769231|-0.644484350871)	Pig.02450,MSTRG.42159	AMOT-201	angiomotin isoform X1 [Sus scrofa]	Pig.17909	PARP12-201	poly [ADP-ribose]	0.91176	0.34007
ChrX_94764251_94789821	Pig.07970.1	Pig.02450,MSTRG.42159	Pig.07970	circRNA	mRNA	1	0.301635	0.734266	0.00654349	0.123576	Chr12_28849(-0.853146853147|-0.629370629371)	Pig.02450,MSTRG.42159	AMOT-201	angiomotin isoform X1 [Sus scrofa]	Pig.07970	LLGL2-202	lethal(2) giant larvae protein homolog 2 [Sus scrofa]	0.849057	0.247528
ChrX_94764251_94789821	Pig.22620.1	Pig.02450,MSTRG.42159	Pig.22620	circRNA	mRNA	2	0.0949035	0.741259	0.00580115	0.119527	mir-504:ssc-miR-504(-0.769230769231|-0.601398601399);Chr12_28094(-0.840631762006|-0.72504489473)	Pig.02450,MSTRG.42159	AMOT-201	angiomotin isoform X1 [Sus scrofa]	Pig.22620	RGS12-201	LOW QUALITY PROTEIN: regulator of G-protein signaling 12 [Sus scrofa]	0.989778	0.291725
ChrX_94764251_94789821	Pig.11826.1	Pig.02450,MSTRG.42159	Pig.11826	circRNA	mRNA	1	0.0842105	0.776224	0.00299286	0.100207	Chr11_26361(-0.839160839161|-0.65034965035)	Pig.02450,MSTRG.42159	AMOT-201	angiomotin isoform X1 [Sus scrofa]	Pig.11826	SLC46A1-201	solute carrier family 46, member 1 [Sus scrofa]	0.873239	0.218377
ChrX_94764251_94789821	Pig.06432.1	Pig.02450,MSTRG.42159	Pig.06432	circRNA	mRNA	2	0.00668338	0.685315	0.013906	0.152823	mir-181:ssc-miR-181b(-0.734265734266|-0.608391608392);Chr12_28849(-0.853146853147|-0.594405594406)	Pig.02450,MSTRG.42159	AMOT-201	angiomotin isoform X1 [Sus scrofa]	Pig.06432	NOTCH3-201	neurogenic locus notch homolog protein 3 [Sus scrofa]	0.979631	0.2515
ChrX_94764251_94789821	Pig.19937.1	Pig.02450,MSTRG.42159	Pig.19937	circRNA	mRNA	1	0.155054	0.825175	0.000951363	0.0835562	Chr08_21275(-0.633976453846|-0.630473821505)	Pig.02450,MSTRG.42159	AMOT-201	angiomotin isoform X1 [Sus scrofa]	Pig.19937	INTS5-201	LOW QUALITY PROTEIN: integrator complex subunit 5 [Sus scrofa]	0.99723	0.116395
ChrX_94764251_94789821	Pig.16028.1	Pig.02450,MSTRG.42159	Pig.16028	circRNA	mRNA	1	0.262476	0.72632	0.00747114	0.127324	mir-504:ssc-miR-504(-0.769230769231|-0.63158283524)	Pig.02450,MSTRG.42159	AMOT-201	angiomotin isoform X1 [Sus scrofa]	Pig.16028	WDR62-201	WD repeat-containing protein 62 [Sus scrofa]	0.901737	0.240879
ChrX_94764251_94789821	Pig.18322.1	Pig.02450,MSTRG.42159	Pig.18322	circRNA	mRNA	1	0.0842105	0.825175	0.000951363	0.0835562	Chr05_13105(-0.862885402736|-0.833880851384)	Pig.02450,MSTRG.42159	AMOT-201	angiomotin isoform X1 [Sus scrofa]	Pig.18322	SELENBP1-201	selenium-binding protein 1 isoform X1 [Sus scrofa]	0.982906	0.446504
ChrX_94764251_94789821	MSTRG.18963.2	Pig.02450,MSTRG.42159	MSTRG.18963	circRNA	mRNA	4	0.000990278	0.881119	0.000152674	0.0630114	ssc-miR-1842(-0.762237762238|-0.671328671329);Chr12_28094(-0.840631762006|-0.774081747514);Chr17_39355(-0.643356643357|-0.685314685315);Chr05_11955(-0.697619342867|-0.608637283828)	Pig.02450,MSTRG.42159	AMOT-201	angiomotin isoform X1 [Sus scrofa]	MSTRG.18963			0.99999	0.122469
ChrX_94764251_94789821	Pig.08828.1	Pig.02450,MSTRG.42159	Pig.08828	circRNA	mRNA	1	0.214024	0.72028	0.00823977	0.128514	mir-504:ssc-miR-504(-0.769230769231|-0.657342657343)	Pig.02450,MSTRG.42159	AMOT-201	angiomotin isoform X1 [Sus scrofa]	Pig.08828	UNC45A-201	protein unc-45 homolog A isoform X2 [Sus scrofa]	0.921569	0.274545
ChrX_94764251_94789821	Pig.18699.1	Pig.02450,MSTRG.42159	Pig.18699	circRNA	mRNA	1	0.301635	0.678322	0.0153173	0.159036	Chr12_28849(-0.853146853147|-0.762237762238)	Pig.02450,MSTRG.42159	AMOT-201	angiomotin isoform X1 [Sus scrofa]	Pig.18699	NCAPD2-202	condensin complex subunit 1 isoform X1 [Sus scrofa]	0.943723	0.59534
ChrX_94764251_94789821	Pig.07973.1	Pig.02450,MSTRG.42159	Pig.07973	circRNA	mRNA	1	0.155054	0.762238	0.00395045	0.107434	Chr03_7531(-0.846153846154|-0.699300699301)	Pig.02450,MSTRG.42159	AMOT-201	angiomotin isoform X1 [Sus scrofa]	Pig.07973	TMEM94-201	transmembrane protein 94 isoform X6 [Sus scrofa]	0.904977	0.314626
ChrX_94764251_94789821	MSTRG.27072.1	Pig.02450,MSTRG.42159	MSTRG.27072	circRNA	mRNA	1	0.0842105	0.853147	0.000418118	0.0714832	Chr05_11955(-0.697619342867|-0.72609360176)	Pig.02450,MSTRG.42159	AMOT-201	angiomotin isoform X1 [Sus scrofa]	MSTRG.27072			0.98	0.149572
ChrX_94764251_94789821	Pig.12266.1	Pig.02450,MSTRG.42159	Pig.12266	circRNA	mRNA	1	0.155054	0.713287	0.00920178	0.1336	Chr12_28849(-0.853146853147|-0.608391608392)	Pig.02450,MSTRG.42159	AMOT-201	angiomotin isoform X1 [Sus scrofa]	Pig.12266	PLIN3-201	perilipin-5 [Sus scrofa]	0.832536	0.244129
ChrX_94764251_94789821	Pig.10552.1	Pig.02450,MSTRG.42159	Pig.10552	circRNA	mRNA	1	0.155054	0.594406	0.0415215	0.221137	Chr12_28849(-0.853146853147|-0.671328671329)	Pig.02450,MSTRG.42159	AMOT-201	angiomotin isoform X1 [Sus scrofa]	Pig.10552	IQGAP3-201	ras GTPase-activating-like protein IQGAP3 isoform X1 [Sus scrofa]	0.880734	0.538375
ChrX_94764251_94789821	Pig.10513.1	Pig.02450,MSTRG.42159	Pig.10513	circRNA	mRNA	1	0.155054	0.679511	0.0150702	0.159036	Chr10_24748(-0.818181818182|-0.612960659796)	Pig.02450,MSTRG.42159	AMOT-201	angiomotin isoform X1 [Sus scrofa]	Pig.10513	THBS3-201	thrombospondin-3 [Sus scrofa]	0.856603	0.28769
ChrX_94764251_94789821	Pig.18741.1	Pig.02450,MSTRG.42159	Pig.18741	circRNA	mRNA	1	0.155054	0.640982	0.0247	0.186127	Chr12_28849(-0.853146853147|-0.718039630047)	Pig.02450,MSTRG.42159	AMOT-201	angiomotin isoform X1 [Sus scrofa]	Pig.18741	AFF2-201	AF4/FMR2 family member 2 isoform X3 [Sus scrofa]	0.914009	0.562795
ChrX_94764251_94789821	Pig.18656.1	Pig.02450,MSTRG.42159	Pig.18656	circRNA	mRNA	1	0.214024	0.825175	0.000951363	0.0835562	mir-504:ssc-miR-504(-0.769230769231|-0.748251748252)	Pig.02450,MSTRG.42159	AMOT-201	angiomotin isoform X1 [Sus scrofa]	Pig.18656	ARRB2-201	beta-arrestin-2 isoform X3 [Sus scrofa]	0.986175	0.236369
ChrX_94764251_94789821	Pig.20803.1	Pig.02450,MSTRG.42159	Pig.20803	circRNA	mRNA	1	0.0842105	0.783217	0.00258621	0.0962432	Chr02_6753(-0.661988246292|-0.577479108467)	Pig.02450,MSTRG.42159	AMOT-201	angiomotin isoform X1 [Sus scrofa]	Pig.20803	PNPLA2-201	patatin-like phospholipase domain-containing 2 [Sus scrofa]	0.931818	0.127999
ChrX_94764251_94789821	Pig.21446.1	Pig.02450,MSTRG.42159	Pig.21446	circRNA	mRNA	1	0.0842105	0.825175	0.000951363	0.0835562	Chr12_28094(-0.840631762006|-0.86865282074)	Pig.02450,MSTRG.42159	AMOT-201	angiomotin isoform X1 [Sus scrofa]	Pig.21446	CYBA-201	cytochrome b-245 light chain isoform X1 [Sus scrofa]	0.983607	0.471283
ChrX_94764251_94789821	Pig.00055.1	Pig.02450,MSTRG.42159	Pig.00055	circRNA	mRNA	1	0.0842105	0.72028	0.00823977	0.128514	Chr12_28849(-0.853146853147|-0.587412587413)	Pig.02450,MSTRG.42159	AMOT-201	angiomotin isoform X1 [Sus scrofa]	Pig.00055	MARS2-202	methionine--tRNA ligase, mitochondrial isoform X1 [Sus scrofa]	0.815534	0.201237
ChrX_94764251_94789821	Pig.03913.1	Pig.02450,MSTRG.42159	Pig.03913	circRNA	mRNA	1	0.0842105	0.699301	0.0113742	0.14423	Chr12_28849(-0.853146853147|-0.65034965035)	Pig.02450,MSTRG.42159	AMOT-201	angiomotin isoform X1 [Sus scrofa]	Pig.03913	SPAG8-203	sperm-associated antigen 8 [Sus scrofa]	0.865116	0.334768
ChrX_94764251_94789821	Pig.17052.1	Pig.02450,MSTRG.42159	Pig.17052	circRNA	mRNA	1	0.0842105	0.644484	0.0236773	0.183841	Chr12_28849(-0.853146853147|-0.679510674288)	Pig.02450,MSTRG.42159	AMOT-201	angiomotin isoform X1 [Sus scrofa]	Pig.17052	FOXRED2-201	FAD-dependent oxidoreductase domain-containing protein 2 precursor [Sus scrofa]	0.886709	0.475275
ChrX_94764251_94789821	Pig.22561.1	Pig.02450,MSTRG.42159	Pig.22561	circRNA	mRNA	1	0.0842105	0.797203	0.00190037	0.0915734	Chr08_21275(-0.633976453846|-0.686515938972)	Pig.02450,MSTRG.42159	AMOT-201	angiomotin isoform X1 [Sus scrofa]	Pig.22561	TMEM143-202	transmembrane protein 143 isoform X2 [Sus scrofa]	0.960212	0.153494
ChrX_94764251_94789821	Pig.14826.1	Pig.02450,MSTRG.42159	Pig.14826	circRNA	mRNA	1	0.0842105	0.636364	0.0260969	0.189707	Chr05_13105(-0.862885402736|-0.73236492165)	Pig.02450,MSTRG.42159	AMOT-201	angiomotin isoform X1 [Sus scrofa]	Pig.14826	DTX4-201	E3 ubiquitin-protein ligase DTX4 isoform X1 [Sus scrofa]	0.918182	0.62353
ChrX_94764251_94789821	Pig.12332.1	Pig.02450,MSTRG.42159	Pig.12332	circRNA	mRNA	1	0.155054	0.692308	0.012593	0.148606	Chr11_26361(-0.839160839161|-0.65034965035)	Pig.02450,MSTRG.42159	AMOT-201	angiomotin isoform X1 [Sus scrofa]	Pig.12332	SPPL2B-201	signal peptide peptidase-like 2B isoform X1 [Sus scrofa]	0.873239	0.337573
ChrX_94764251_94789821	Pig.08781.1	Pig.02450,MSTRG.42159	Pig.08781	circRNA	mRNA	1	0.0842105	0.909091	4.19104e-05	0.0485437	Chr03_7531(-0.846153846154|-0.769230769231)	Pig.02450,MSTRG.42159	AMOT-201	angiomotin isoform X1 [Sus scrofa]	Pig.08781	SEMA4B-201	semaphorin-4B [Sus scrofa]	0.952381	0.150857
ChrX_94764251_94789821	Pig.18902.1	Pig.02450,MSTRG.42159	Pig.18902	circRNA	mRNA	1	0.262476	0.734266	0.00654349	0.123576	Chr02_6753(-0.661988246292|-0.584521536619)	Pig.02450,MSTRG.42159	AMOT-201	angiomotin isoform X1 [Sus scrofa]	Pig.18902	P3H2-201	prolyl 3-hydroxylase 1 isoform X2 [Sus scrofa]	0.937853	0.163148
ChrX_94764251_94789821	Pig.14333.1	Pig.02450,MSTRG.42159	Pig.14333	circRNA	mRNA	1	0.0842105	0.699301	0.0113742	0.14423	Chr11_26361(-0.839160839161|-0.783216783217)	Pig.02450,MSTRG.42159	AMOT-201	angiomotin isoform X1 [Sus scrofa]	Pig.14333	LCMT2	tRNA wybutosine-synthesizing protein 4 [Sus scrofa]	0.965517	0.574934
ChrX_94764251_94789821	Pig.16096.1	Pig.02450,MSTRG.42159	Pig.16096	circRNA	mRNA	1	0.214024	0.749563	0.00500405	0.118841	Chr02_6753(-0.661988246292|-0.582018728798)	Pig.02450,MSTRG.42159	AMOT-201	angiomotin isoform X1 [Sus scrofa]	Pig.16096	LRIG3-201	leucine-rich repeats and immunoglobulin-like domains protein 3 [Sus scrofa]	0.935716	0.15189
ChrX_94764251_94789821	MSTRG.34975.2	Pig.02450,MSTRG.42159	MSTRG.34975	circRNA	mRNA	1	0.0842105	0.672505	0.0165693	0.162623	Chr12_28849(-0.853146853147|-0.728547527072)	Pig.02450,MSTRG.42159	AMOT-201	angiomotin isoform X1 [Sus scrofa]	MSTRG.34975			0.921224	0.529932
ChrX_94764251_94789821	Pig.12624.1	Pig.02450,MSTRG.42159	Pig.12624	circRNA	mRNA	1	0.155054	0.577934	0.0490488	0.233043	Chr08_21275(-0.633976453846|-0.663157894737)	Pig.02450,MSTRG.42159	AMOT-201	angiomotin isoform X1 [Sus scrofa]	Pig.12624	RAD54L-202	DNA repair and recombination protein RAD54-like [Sus scrofa]	0.977503	0.305824
ChrX_94764251_94789821	Pig.09792.1	Pig.02450,MSTRG.42159	Pig.09792	circRNA	mRNA	1	0.155054	0.658495	0.0198921	0.173534	Chr08_21275(-0.633976453846|-0.59649122807)	Pig.02450,MSTRG.42159	AMOT-201	angiomotin isoform X1 [Sus scrofa]	Pig.09792	MAGED1-201	melanoma-associated antigen D4-like [Sus scrofa]	0.969536	0.20686
ChrX_94764251_94789821	Pig.16786.1	Pig.02450,MSTRG.42159	Pig.16786	circRNA	mRNA	1	0.262476	0.728548	0.00720175	0.127324	Chr12_28849(-0.853146853147|-0.672505409605)	Pig.02450,MSTRG.42159	AMOT-201	angiomotin isoform X1 [Sus scrofa]	Pig.16786	TTYH1-201	protein tweety homolog 1 isoform X1 [Sus scrofa]	0.881597	0.327595
ChrX_94764251_94789821	Pig.11482.1	Pig.02450,MSTRG.42159	Pig.11482	circRNA	mRNA	1	0.0842105	0.678322	0.0153173	0.159036	mir-504:ssc-miR-504(-0.769230769231|-0.664335664336)	Pig.02450,MSTRG.42159	AMOT-201	angiomotin isoform X1 [Sus scrofa]	Pig.11482	SMYD5-201	homeobox protein notochord [Sus scrofa]	0.926829	0.328032
ChrX_94764251_94789821	Pig.20023.1	Pig.02450,MSTRG.42159	Pig.20023	circRNA	mRNA	1	0.0842105	0.594406	0.0415215	0.221137	Chr12_28849(-0.853146853147|-0.685314685315)	Pig.02450,MSTRG.42159	AMOT-201	angiomotin isoform X1 [Sus scrofa]	Pig.20023	MYADML2-201	myeloid-associated differentiation marker-like protein 2 [Sus scrofa]	0.890909	0.56879
ChrX_94764251_94789821	Pig.19812.1	Pig.02450,MSTRG.42159	Pig.19812	circRNA	mRNA	1	0.155054	0.783217	0.00258621	0.0962432	Chr08_21275(-0.633976453846|-0.690018571313)	Pig.02450,MSTRG.42159	AMOT-201	angiomotin isoform X1 [Sus scrofa]	Pig.19812	SGSH-201	N-sulphoglucosamine sulphohydrolase [Sus scrofa]	0.957672	0.165506
ChrX_94764251_94789821	Pig.18159.1	Pig.02450,MSTRG.42159	Pig.18159	circRNA	mRNA	1	0.0842105	0.734266	0.00654349	0.123576	Chr05_11955(-0.697619342867|-0.694060060506)	Pig.02450,MSTRG.42159	AMOT-201	angiomotin isoform X1 [Sus scrofa]	Pig.18159	S100A6-201	protein S100-A6 isoform X1 [Sus scrofa]	0.997442	0.249432
ChrX_94764251_94789821	Pig.14704.1	Pig.02450,MSTRG.42159	Pig.14704	circRNA	mRNA	1	0.155054	0.72028	0.00823977	0.128514	Chr12_28849(-0.853146853147|-0.657342657343)	Pig.02450,MSTRG.42159	AMOT-201	angiomotin isoform X1 [Sus scrofa]	Pig.14704	PLXND1-201	plexin-D1 isoform X1 [Sus scrofa]	0.87037	0.314635
ChrX_94764251_94789821	Pig.10835.1	Pig.02450,MSTRG.42159	Pig.10835	circRNA	mRNA	1	0.301635	0.693521	0.0123749	0.148606	Chr12_28849(-0.853146853147|-0.605955395113)	Pig.02450,MSTRG.42159	AMOT-201	angiomotin isoform X1 [Sus scrofa]	Pig.10835	DISP1-201	protein dispatched homolog 1 isoform X3 [Sus scrofa]	0.830587	0.268082
ChrX_94764251_94789821	Pig.12679.1	Pig.02450,MSTRG.42159	Pig.12679	circRNA	mRNA	1	0.155054	0.713287	0.00920178	0.1336	Chr12_28849(-0.853146853147|-0.65034965035)	Pig.02450,MSTRG.42159	AMOT-201	angiomotin isoform X1 [Sus scrofa]	Pig.12679	TIE1-201	tyrosine-protein kinase receptor Tie-1 isoform X6 [Sus scrofa]	0.865116	0.31346
ChrX_94764251_94789821	Pig.15860.1	Pig.02450,MSTRG.42159	Pig.15860	circRNA	mRNA	2	0.0733707	0.630474	0.0279603	0.195771	Chr03_7531(-0.846153846154|-0.609458027454);Chr12_28849(-0.853146853147|-0.588442233404)	Pig.02450,MSTRG.42159	AMOT-201	angiomotin isoform X1 [Sus scrofa]	Pig.15860	BSN-201	protein bassoon isoform X2 [Sus scrofa]	0.969921	0.342386
ChrX_94764251_94789821	MSTRG.7156.1	Pig.02450,MSTRG.42159	MSTRG.7156	circRNA	mRNA	1	0.301635	0.671329	0.0168315	0.162623	mir-504:ssc-miR-504(-0.769230769231|-0.643356643357)	Pig.02450,MSTRG.42159	AMOT-201	angiomotin isoform X1 [Sus scrofa]	MSTRG.7156			0.910891	0.310642
ChrX_94764251_94789821	Pig.10509.1	Pig.02450,MSTRG.42159	Pig.10509	circRNA	mRNA	2	0.00668338	0.853147	0.000418118	0.0714832	Chr08_21275(-0.633976453846|-0.718039630047);Chr12_28849(-0.853146853147|-0.783216783217)	Pig.02450,MSTRG.42159	AMOT-201	angiomotin isoform X1 [Sus scrofa]	Pig.10509	CCDC42-201	dolichol-phosphate mannosyltransferase subunit 3 [Sus scrofa]	0.997154	0.198395
ChrX_94764251_94789821	Pig.09950.1	Pig.02450,MSTRG.42159	Pig.09950	circRNA	mRNA	1	0.0842105	0.672505	0.0165693	0.162623	Chr12_28849(-0.853146853147|-0.70402910068)	Pig.02450,MSTRG.42159	AMOT-201	angiomotin isoform X1 [Sus scrofa]	Pig.09950	FANCC	Fanconi anemia group C protein isoform X1 [Sus scrofa]	0.904238	0.478524
ChrX_94764251_94789821	MSTRG.17879.1	Pig.02450,MSTRG.42159	MSTRG.17879	circRNA	mRNA	3	0.0018524	0.624565	0.0299242	0.199692	Chr03_7531(-0.846153846154|-0.740355434643);Chr12_28849(-0.853146853147|-0.719302673468);Chr05_13105(-0.862885402736|-0.596683268055)	Pig.02450,MSTRG.42159	AMOT-201	angiomotin isoform X1 [Sus scrofa]	MSTRG.17879			0.997673	0.526145
ChrX_94764251_94789821	MSTRG.18482.1	Pig.02450,MSTRG.42159	MSTRG.18482	circRNA	mRNA	1	0.0842105	0.664872	0.0183246	0.168318	Chr05_11955(-0.697619342867|-0.663793558633)	Pig.02450,MSTRG.42159	AMOT-201	angiomotin isoform X1 [Sus scrofa]	MSTRG.18482			0.975154	0.288286
ChrX_94764251_94789821	Pig.18822.1	Pig.02450,MSTRG.42159	Pig.18822	circRNA	mRNA	2	0.00668338	0.706294	0.0102452	0.139666	Chr03_7531(-0.846153846154|-0.678321678322);Chr12_28849(-0.853146853147|-0.685314685315)	Pig.02450,MSTRG.42159	AMOT-201	angiomotin isoform X1 [Sus scrofa]	Pig.18822	CTC1	LOW QUALITY PROTEIN: CST complex subunit CTC1 [Sus scrofa]	0.987989	0.377262
ChrX_94764251_94789821	Pig.07425.1	Pig.02450,MSTRG.42159	Pig.07425	circRNA	mRNA	1	0.155054	0.587413	0.0446093	0.225097	Chr08_21275(-0.633976453846|-0.654992247896)	Pig.02450,MSTRG.42159	AMOT-201	angiomotin isoform X1 [Sus scrofa]	Pig.07425	MYBL2-201	myb-related protein B [Sus scrofa]	0.983696	0.292801
ChrX_94764251_94789821	Pig.07708.1	Pig.02450,MSTRG.42159	Pig.07708	circRNA	mRNA	1	0.0842105	0.671329	0.0168315	0.162623	Chr12_28849(-0.853146853147|-0.692307692308)	Pig.02450,MSTRG.42159	AMOT-201	angiomotin isoform X1 [Sus scrofa]	Pig.07708	PDE1B-201	calcium/calmodulin-dependent 3',5'-cyclic nucleotide phosphodiesterase 1B isoform X1 [Sus scrofa]	0.895928	0.456982
ChrX_94764251_94789821	Pig.18243.1	Pig.02450,MSTRG.42159	Pig.18243	circRNA	mRNA	1	0.214024	0.795485	0.0019761	0.0924511	Chr08_21275(-0.633976453846|-0.689243827105)	Pig.02450,MSTRG.42159	AMOT-201	angiomotin isoform X1 [Sus scrofa]	Pig.18243	DHX57-203	putative ATP-dependent RNA helicase TDRD9 isoform X2 [Sus scrofa]	0.958233	0.155631
ChrX_94764251_94789821	Pig.15616.1	Pig.02450,MSTRG.42159	Pig.15616	circRNA	mRNA	1	0.0842105	0.923077	1.8622e-05	0.0331603	Chr12_28849(-0.853146853147|-0.776223776224)	Pig.02450,MSTRG.42159	AMOT-201	angiomotin isoform X1 [Sus scrofa]	Pig.15616	SNX17-201	PREDICTED: sorting nexin-17 isoform X1 [Trichechus manatus latirostris]	0.95279	0.129976
ChrX_94764251_94789821	MSTRG.34889.1	Pig.02450,MSTRG.42159	MSTRG.34889	circRNA	mRNA	1	0.0842105	0.715794	0.00884773	0.1336	Chr11_26361(-0.839160839161|-0.652635596415)	Pig.02450,MSTRG.42159	AMOT-201	angiomotin isoform X1 [Sus scrofa]	MSTRG.34889			0.874966	0.307801
ChrX_94764251_94789821	Pig.12853.1	Pig.02450,MSTRG.42159	Pig.12853	circRNA	mRNA	1	0.214024	0.713287	0.00920178	0.1336	Chr02_6753(-0.661988246292|-0.591563964771)	Pig.02450,MSTRG.42159	AMOT-201	angiomotin isoform X1 [Sus scrofa]	Pig.12853	SLCO2B1-201	LOW QUALITY PROTEIN: solute carrier organic anion transporter family member 2B1 [Sus scrofa]	0.94382	0.180973
ChrX_94764251_94789821	Pig.07807.1	Pig.02450,MSTRG.42159	Pig.07807	circRNA	mRNA	2	0.00668338	0.740355	0.00589329	0.119527	Chr02_6753(-0.661988246292|-0.590109691166);Chr05_11955(-0.697619342867|-0.671497095037)	Pig.02450,MSTRG.42159	AMOT-201	angiomotin isoform X1 [Sus scrofa]	Pig.07807	CX3CR1-201	CX3C chemokine receptor 1 [Sus scrofa]	0.99817	0.195311
ChrX_94764251_94789821	Pig.12644.1	Pig.02450,MSTRG.42159	Pig.12644	circRNA	mRNA	1	0.0842105	0.776224	0.00299286	0.100207	Chr12_28849(-0.853146853147|-0.804195804196)	Pig.02450,MSTRG.42159	AMOT-201	angiomotin isoform X1 [Sus scrofa]	Pig.12644	UROD-201	uroporphyrinogen decarboxylase [Sus scrofa]	0.970464	0.485551
ChrX_94764251_94789821	Pig.19810.1	Pig.02450,MSTRG.42159	Pig.19810	circRNA	mRNA	1	0.214024	0.685315	0.013906	0.152823	Chr05_13105(-0.862885402736|-0.739616059488)	Pig.02450,MSTRG.42159	AMOT-201	angiomotin isoform X1 [Sus scrofa]	Pig.19810	RNF213	PREDICTED: LOW QUALITY PROTEIN: E3 ubiquitin-protein ligase RNF213 [Balaenoptera acutorostrata scammoni]	0.923077	0.546814
ChrX_94764251_94789821	Pig.18042.1	Pig.02450,MSTRG.42159	Pig.18042	circRNA	mRNA	2	0.00668338	0.804196	0.00161477	0.0904396	Chr03_7531(-0.846153846154|-0.692307692308);Chr12_28849(-0.853146853147|-0.643356643357)	Pig.02450,MSTRG.42159	AMOT-201	angiomotin isoform X1 [Sus scrofa]	Pig.18042	TREX2-201	three prime repair exonuclease 2 [Sus scrofa]	0.985174	0.200598
ChrX_94764251_94789821	Pig.09306.1	Pig.02450,MSTRG.42159	Pig.09306	circRNA	mRNA	1	0.214024	0.73205	0.00679293	0.123576	Chr12_28849(-0.853146853147|-0.858144923714)	Pig.02450,MSTRG.42159	AMOT-201	angiomotin isoform X1 [Sus scrofa]	Pig.09306	PTK7-201	inactive tyrosine-protein kinase 7 [Sus scrofa]	0.997079	0.732325
ChrX_94764251_94789821	Pig.07921.1	Pig.02450,MSTRG.42159	Pig.07921	circRNA	mRNA	1	0.0842105	0.888112	0.000114134	0.0630114	Chr05_11955(-0.697619342867|-0.629992977997)	Pig.02450,MSTRG.42159	AMOT-201	angiomotin isoform X1 [Sus scrofa]	Pig.07921	UQCRC1-201	cytochrome b-c1 complex subunit 1, mitochondrial isoform X1 [Sus scrofa]	0.949062	0.0818422
ChrX_94764251_94789821	MSTRG.12911.1	Pig.02450,MSTRG.42159	MSTRG.12911	circRNA	mRNA	1	0.0842105	0.692308	0.012593	0.148606	Chr12_28094(-0.840631762006|-0.633976453846)	Pig.02450,MSTRG.42159	AMOT-201	angiomotin isoform X1 [Sus scrofa]	MSTRG.12911			0.859857	0.311824
ChrX_94764251_94789821	Pig.21160.1	Pig.02450,MSTRG.42159	Pig.21160	circRNA	mRNA	1	0.0842105	0.644484	0.0236773	0.183841	ssc-miR-1842(-0.762237762238|-0.630473821505)	Pig.02450,MSTRG.42159	AMOT-201	angiomotin isoform X1 [Sus scrofa]	Pig.21160	SYNPO	LOW QUALITY PROTEIN: synaptopodin [Sus scrofa]	0.90539	0.318249
ChrX_94764251_94789821	Pig.11978.1	Pig.02450,MSTRG.42159	Pig.11978	circRNA	mRNA	1	0.0842105	0.678322	0.0153173	0.159036	Chr10_24748(-0.818181818182|-0.65034965035)	Pig.02450,MSTRG.42159	AMOT-201	angiomotin isoform X1 [Sus scrofa]	Pig.11978	AFAP1L1-203	actin filament-associated protein 1-like 1 [Sus scrofa]	0.885714	0.343544
ChrX_94764251_94789821	MSTRG.43551.1	Pig.02450,MSTRG.42159	MSTRG.43551	circRNA	mRNA	1	0.155054	0.755245	0.00450844	0.112606	Chr03_7531(-0.846153846154|-0.699300699301)	Pig.02450,MSTRG.42159	AMOT-201	angiomotin isoform X1 [Sus scrofa]	MSTRG.43551			0.904977	0.32599
ChrX_94764251_94789821	Pig.15852.1	Pig.02450,MSTRG.42159	Pig.15852	circRNA	mRNA	1	0.155054	0.770579	0.00335518	0.103583	Chr12_28849(-0.853146853147|-0.812610703272)	Pig.02450,MSTRG.42159	AMOT-201	angiomotin isoform X1 [Sus scrofa]	Pig.15852	UBA7-201	ubiquitin-like modifier-activating enzyme 7 [Sus scrofa]	0.975665	0.516321
ChrX_94764251_94789821	MSTRG.36474.1	Pig.02450,MSTRG.42159	MSTRG.36474	circRNA	mRNA	1	0.214024	0.741259	0.00580115	0.119527	Chr05_13105(-0.862885402736|-0.841131989222)	Pig.02450,MSTRG.42159	AMOT-201	angiomotin isoform X1 [Sus scrofa]	MSTRG.36474			0.987234	0.684705
ChrX_94764251_94789821	Pig.14753.1	Pig.02450,MSTRG.42159	Pig.14753	circRNA	mRNA	1	0.155054	0.776224	0.00299286	0.100207	Chr08_21275(-0.633976453846|-0.693521203655)	Pig.02450,MSTRG.42159	AMOT-201	angiomotin isoform X1 [Sus scrofa]	Pig.14753	VWCE-201	von Willebrand factor C and EGF domain-containing protein isoform X1 [Sus scrofa]	0.955145	0.172173
ChrX_94764251_94789821	Pig.17713.1	Pig.02450,MSTRG.42159	Pig.17713	circRNA	mRNA	1	0.301635	0.624565	0.0299242	0.199692	Chr12_28849(-0.853146853147|-0.659653183473)	Pig.02450,MSTRG.42159	AMOT-201	angiomotin isoform X1 [Sus scrofa]	Pig.17713	FBN3-203	fibrillin-3 [Sus scrofa]	0.872096	0.466981
ChrX_94764251_94789821	MSTRG.30061.2	Pig.02450,MSTRG.42159	MSTRG.30061	circRNA	mRNA	3	0.00430732	0.686516	0.0136736	0.152823	Chr11_26361(-0.839160839161|-0.676008041947);Chr08_21275(-0.633976453846|-0.722807017544);Chr12_28849(-0.853146853147|-0.595447498088)	Pig.02450,MSTRG.42159	AMOT-201	angiomotin isoform X1 [Sus scrofa]	MSTRG.30061			0.997614	0.30299
ChrX_94764251_94789821	Pig.10363.1	Pig.02450,MSTRG.42159	Pig.10363	circRNA	mRNA	1	0.214024	0.748252	0.00512408	0.118841	Chr11_26361(-0.839160839161|-0.622377622378)	Pig.02450,MSTRG.42159	AMOT-201	angiomotin isoform X1 [Sus scrofa]	Pig.10363	CORO7-PAM16	coronin-7 isoform X1 [Sus scrofa]	0.851675	0.217424
ChrX_94764251_94789821	Pig.03444.1	Pig.02450,MSTRG.42159	Pig.03444	circRNA	mRNA	1	0.155054	0.693521	0.0123749	0.148606	Chr12_28849(-0.853146853147|-0.633976453846)	Pig.02450,MSTRG.42159	AMOT-201	angiomotin isoform X1 [Sus scrofa]	Pig.03444	ATP7A-203	LOW QUALITY PROTEIN: copper-transporting ATPase 2 [Sus scrofa]	0.852621	0.315155
ChrX_94764251_94789821	Pig.07765.1	Pig.02450,MSTRG.42159	Pig.07765	circRNA	mRNA	1	0.0842105	0.626971	0.0291129	0.198294	Chr10_24748(-0.818181818182|-0.672505409605)	Pig.02450,MSTRG.42159	AMOT-201	angiomotin isoform X1 [Sus scrofa]	Pig.07765	LZTS1-201	leucine zipper putative tumor suppressor 1 [Sus scrofa]	0.902276	0.44663
ChrX_94764251_94789821	Pig.09158.1	Pig.02450,MSTRG.42159	Pig.09158	circRNA	mRNA	1	0.214024	0.72028	0.00823977	0.128514	Chr12_28849(-0.853146853147|-0.65034965035)	Pig.02450,MSTRG.42159	AMOT-201	angiomotin isoform X1 [Sus scrofa]	Pig.09158	SLC12A9-201	solute carrier family 12 member 9 isoform X1 [Sus scrofa]	0.865116	0.302807
ChrX_94764251_94789821	Pig.07326.1	Pig.02450,MSTRG.42159	Pig.07326	circRNA	mRNA	1	0.0842105	0.594406	0.0415215	0.221137	Chr03_7531(-0.846153846154|-0.601398601399)	Pig.02450,MSTRG.42159	AMOT-201	angiomotin isoform X1 [Sus scrofa]	Pig.07326	ENOX1-201	ecto-NOX disulfide-thiol exchanger 1 isoform X1 [Sus scrofa]	0.830918	0.393533
ChrX_94764251_94789821	Pig.01321.1	Pig.02450,MSTRG.42159	Pig.01321	circRNA	mRNA	1	0.214024	0.742558	0.00567053	0.119527	Chr05_13105(-0.862885402736|-0.679169787353)	Pig.02450,MSTRG.42159	AMOT-201	angiomotin isoform X1 [Sus scrofa]	Pig.01321	KCP-201	kielin/chordin-like protein isoform X1 [Sus scrofa]	0.880863	0.320639
ChrX_94764251_94789821	Pig.08573.1	Pig.02450,MSTRG.42159	Pig.08573	circRNA	mRNA	1	0.0842105	0.872155	0.000216175	0.0630114	ssc-miR-1842(-0.762237762238|-0.812610703272)	Pig.02450,MSTRG.42159	AMOT-201	angiomotin isoform X1 [Sus scrofa]	Pig.08573	MIIP-201	migration and invasion-inhibitory protein [Sus scrofa]	0.968014	0.202166
ChrX_94764251_94789821	Pig.18835.1	Pig.02450,MSTRG.42159	Pig.18835	circRNA	mRNA	1	0.356415	0.854642	0.000398308	0.0714832	Chr05_13105(-0.862885402736|-0.835342519204)	Pig.02450,MSTRG.42159	AMOT-201	angiomotin isoform X1 [Sus scrofa]	Pig.18835	PIK3R6-203	phosphoinositide 3-kinase regulatory subunit 6 isoform X3 [Sus scrofa]	0.983781	0.372924
ChrX_94764251_94789821	Pig.06513.1	Pig.02450,MSTRG.42159	Pig.06513	circRNA	mRNA	1	0.0842105	0.725045	0.00762875	0.127324	Chr10_25226(-0.657342657343|-0.672505409605)	Pig.02450,MSTRG.42159	AMOT-201	angiomotin isoform X1 [Sus scrofa]	Pig.06513	EPHB3-201	ephrin type-B receptor 3 isoform X1 [Sus scrofa]	0.988598	0.217667
ChrX_94764251_94789821	Pig.16377.1	Pig.02450,MSTRG.42159	Pig.16377	circRNA	mRNA	1	0.0842105	0.797203	0.00190037	0.0915734	Chr12_28849(-0.853146853147|-0.692307692308)	Pig.02450,MSTRG.42159	AMOT-201	angiomotin isoform X1 [Sus scrofa]	Pig.16377	LZTS2-201	PREDICTED: leucine zipper putative tumor suppressor 2 isoform X1 [Equus caballus]	0.895928	0.248475
ChrX_94764251_94789821	Pig.18714.1	Pig.02450,MSTRG.42159	Pig.18714	circRNA	mRNA	1	0.155054	0.664336	0.0184527	0.168318	Chr10_24748(-0.818181818182|-0.699300699301)	Pig.02450,MSTRG.42159	AMOT-201	angiomotin isoform X1 [Sus scrofa]	Pig.18714	P3H3-201	prolyl 3-hydroxylase 3 isoform X1 [Sus scrofa]	0.921659	0.44005
ChrX_94764251_94789821	Pig.14580.1	Pig.02450,MSTRG.42159	Pig.14580	circRNA	mRNA	1	0.0842105	0.805605	0.00156143	0.0904396	Chr05_13105(-0.862885402736|-0.791759431245)	Pig.02450,MSTRG.42159	AMOT-201	angiomotin isoform X1 [Sus scrofa]	Pig.14580	TMEM173-202	stimulator of interferon genes protein isoform X3 [Sus scrofa]	0.957014	0.409098
ChrX_94764251_94789821	Pig.20300.1	Pig.02450,MSTRG.42159	Pig.20300	circRNA	mRNA	1	0.332614	0.666693	0.017894	0.168245	mir-504:ssc-miR-504(-0.769230769231|-0.582033212821)	Pig.02450,MSTRG.42159	AMOT-201	angiomotin isoform X1 [Sus scrofa]	Pig.20300	CACNA1E-201	PREDICTED: voltage-dependent P/Q-type calcium channel subunit alpha-1A isoform X12 [Pan troglodytes]	0.861465	0.245254
ChrX_94764251_94789821	Pig.09091.1	Pig.02450,MSTRG.42159	Pig.09091	circRNA	mRNA	1	0.0842105	0.783217	0.00258621	0.0962432	Chr11_26361(-0.839160839161|-0.72027972028)	Pig.02450,MSTRG.42159	AMOT-201	angiomotin isoform X1 [Sus scrofa]	Pig.09091	Atp5j2	ATP5J2, partial [Cervus elaphus hippelaphus]	0.923767	0.309338
ChrX_94764251_94789821	MSTRG.10050.1	Pig.02450,MSTRG.42159	MSTRG.10050	circRNA	mRNA	1	0.155054	0.746061	0.00532943	0.119527	Chr12_28849(-0.853146853147|-0.718039630047)	Pig.02450,MSTRG.42159	AMOT-201	angiomotin isoform X1 [Sus scrofa]	MSTRG.10050			0.914009	0.378467
ChrX_94764251_94789821	MSTRG.12124.1	Pig.02450,MSTRG.42159	MSTRG.12124	circRNA	mRNA	1	0.214024	0.706294	0.0102452	0.139666	Chr03_7531(-0.846153846154|-0.657342657343)	Pig.02450,MSTRG.42159	AMOT-201	angiomotin isoform X1 [Sus scrofa]	MSTRG.12124			0.874419	0.332604
ChrX_94764251_94789821	Pig.17197.1	Pig.02450,MSTRG.42159	Pig.17197	circRNA	mRNA	1	0.214024	0.888112	0.000114134	0.0630114	Chr05_11955(-0.697619342867|-0.615755848551)	Pig.02450,MSTRG.42159	AMOT-201	angiomotin isoform X1 [Sus scrofa]	Pig.17197	KPTN-201	kaptin isoform X1 [Sus scrofa]	0.937669	0.0758486
ChrX_94764251_94789821	Pig.12888.1	Pig.02450,MSTRG.42159	Pig.12888	circRNA	mRNA	2	0.00668338	0.671329	0.0168315	0.162623	Chr10_24748(-0.818181818182|-0.636363636364);ssc-miR-9843-3p(-0.713286713287|-0.776223776224)	Pig.02450,MSTRG.42159	AMOT-201	angiomotin isoform X1 [Sus scrofa]	Pig.12888	PDE2A-201	cGMP-dependent 3',5'-cyclic phosphodiesterase isoform X1 [Sus scrofa]	0.991295	0.368336
ChrX_94764251_94789821	Pig.09740.1	Pig.02450,MSTRG.42159	Pig.09740	circRNA	mRNA	1	0.214024	0.682671	0.0144277	0.156155	Chr05_13105(-0.862885402736|-0.666671342519)	Pig.02450,MSTRG.42159	AMOT-201	angiomotin isoform X1 [Sus scrofa]	Pig.09740	CARMIL3-201	LOW QUALITY PROTEIN: capping protein, Arp2/3 and myosin-I linker protein 3 [Sus scrofa]	0.871718	0.397537
ChrX_94764251_94789821	MSTRG.9602.1	Pig.02450,MSTRG.42159	MSTRG.9602	circRNA	mRNA	3	0.00800928	0.741259	0.00580115	0.119527	Chr10_24748(-0.818181818182|-0.762237762238);Chr05_13105(-0.862885402736|-0.804876300031);Chr10_25226(-0.657342657343|-0.622377622378)	Pig.02450,MSTRG.42159	AMOT-201	angiomotin isoform X1 [Sus scrofa]	MSTRG.9602			0.999964	0.396273
ChrX_94764251_94789821	Pig.05789.1	Pig.02450,MSTRG.42159	Pig.05789	circRNA	mRNA	1	0.0842105	0.731117	0.00690006	0.1251	Chr12_28849(-0.853146853147|-0.622152759927)	Pig.02450,MSTRG.42159	AMOT-201	angiomotin isoform X1 [Sus scrofa]	Pig.05789	EMID1-208	EMI domain-containing protein 1 isoform X1 [Sus scrofa]	0.843426	0.240611
Chr16_62058944_62066699	Pig.08573.1	Pig.06635	Pig.08573	circRNA	mRNA	1	0.0105263	0.645359	0.0234267	0.183841	ssc-miR-1842(-0.626433695636|-0.812610703272)	Pig.06635	GOLPH3	PREDICTED: Golgi phosphoprotein 3 [Orycteropus afer afer]	Pig.08573	MIIP-201	migration and invasion-inhibitory protein [Sus scrofa]	0.870625	0.345298
Chr15_46857316_46862067	Pig.21583.1	MSTRG.36392,Pig.02709	Pig.21583	circRNA	mRNA	1	0.0315789	0.580532	0.0478026	0.23044	Chr03_7854(-0.598606392923|-0.646757671337)	MSTRG.36392,Pig.02709	ACSL1-206	long-chain-fatty-acid--CoA ligase 1 isoform X1 [Sus scrofa]	Pig.21583	CPT1C-202	PREDICTED: carnitine O-palmitoyltransferase 1, brain isoform [Balaenoptera acutorostrata scammoni]	0.961336	0.264012
Chr15_46857316_46862067	Pig.02726.1	MSTRG.36392,Pig.02709	Pig.02726	circRNA	mRNA	1	0.0614871	0.6972	0.0117306	0.145686	Chr03_7854(-0.598606392923|-0.748251748252)	MSTRG.36392,Pig.02709	ACSL1-206	long-chain-fatty-acid--CoA ligase 1 isoform X1 [Sus scrofa]	Pig.02726	TENM3-201	teneurin-3 isoform X1 [Sus scrofa]	0.888893	0.228098
Chr15_46857316_46862067	MSTRG.18963.2	MSTRG.36392,Pig.02709	MSTRG.18963	circRNA	mRNA	1	0.187792	0.612691	0.0341681	0.207077	ssc-miR-1842(-0.626776105532|-0.671328671329)	MSTRG.36392,Pig.02709	ACSL1-206	long-chain-fatty-acid--CoA ligase 1 isoform X1 [Sus scrofa]	MSTRG.18963			0.965679	0.280371
Chr15_46857316_46862067	MSTRG.21578.1	MSTRG.36392,Pig.02709	MSTRG.21578	circRNA	mRNA	2	0.00782949	0.626776	0.0291781	0.198294	Chr02_5821(-0.816921665637|-0.58041958042);mir-874:ssc-miR-874(-0.61973367738|-0.657342657343)	MSTRG.36392,Pig.02709	ACSL1-206	long-chain-fatty-acid--CoA ligase 1 isoform X1 [Sus scrofa]	MSTRG.21578			0.985243	0.278815
Chr15_46857316_46862067	Pig.18196.1	MSTRG.36392,Pig.02709	Pig.18196	circRNA	mRNA	1	0.165461	0.779995	0.00276793	0.0985326	Chr03_7854(-0.598606392923|-0.714123222897)	MSTRG.36392,Pig.02709	ACSL1-206	long-chain-fatty-acid--CoA ligase 1 isoform X1 [Sus scrofa]	Pig.18196	CFAP46-201	cilia- and flagella-associated protein 46 isoform X3 [Sus scrofa]	0.912003	0.151339
Chr15_46857316_46862067	Pig.19892.1	MSTRG.36392,Pig.02709	Pig.19892	circRNA	mRNA	1	0.0315789	0.643114	0.0240739	0.184225	Chr02_5821(-0.816921665637|-0.694741118764)	MSTRG.36392,Pig.02709	ACSL1-206	long-chain-fatty-acid--CoA ligase 1 isoform X1 [Sus scrofa]	Pig.19892	PLEC-201	LOW QUALITY PROTEIN: poly [ADP-ribose]	0.919175	0.460957
Chr15_46857316_46862067	Pig.15851.1	MSTRG.36392,Pig.02709	Pig.15851	circRNA	mRNA	2	0.000835422	0.804244	0.00161292	0.0904396	Chr02_5821(-0.816921665637|-0.749563321122);mir-874:ssc-miR-874(-0.61973367738|-0.707531733022)	MSTRG.36392,Pig.02709	ACSL1-206	long-chain-fatty-acid--CoA ligase 1 isoform X1 [Sus scrofa]	Pig.15851	TRAIP-201	E3 ubiquitin-protein ligase TRAIP isoform X1 [Sus scrofa]	0.996888	0.223155
Chr15_46857316_46862067	Pig.09865.1	MSTRG.36392,Pig.02709	Pig.09865	circRNA	mRNA	1	0.0614871	0.788752	0.00229539	0.0938036	Chr03_7854(-0.598606392923|-0.636363636364)	MSTRG.36392,Pig.02709	ACSL1-206	long-chain-fatty-acid--CoA ligase 1 isoform X1 [Sus scrofa]	Pig.09865	CDK16-201	cyclin-dependent kinase 16 isoform X6 [Sus scrofa]	0.969427	0.128759
Chr15_46857316_46862067	Pig.09468.1	MSTRG.36392,Pig.02709	Pig.09468	circRNA	mRNA	1	0.0315789	0.838049	0.000664043	0.0767553	Chr03_7854(-0.598606392923|-0.643356643357)	MSTRG.36392,Pig.02709	ACSL1-206	long-chain-fatty-acid--CoA ligase 1 isoform X1 [Sus scrofa]	Pig.09468	TBC1D8-202	TBC1 domain family member 8 isoform X1 [Sus scrofa]	0.963968	0.0994757
Chr15_46857316_46862067	Pig.03188.1	MSTRG.36392,Pig.02709	Pig.03188	circRNA	mRNA	1	0.0315789	0.894388	8.64551e-05	0.0609819	Chr03_7854(-0.598606392923|-0.678321678322)	MSTRG.36392,Pig.02709	ACSL1-206	long-chain-fatty-acid--CoA ligase 1 isoform X1 [Sus scrofa]	Pig.03188	ASAP3-201	LOW QUALITY PROTEIN: arf-GAP with SH3 domain, ANK repeat and PH domain-containing protein 3 [Sus scrofa]	0.937573	0.0646935
Chr15_46857316_46862067	Pig.19228.1	MSTRG.36392,Pig.02709	Pig.19228	circRNA	mRNA	1	0.0315789	0.647903	0.0227091	0.18051	Chr03_7854(-0.598606392923|-0.594405594406)	MSTRG.36392,Pig.02709	ACSL1-206	long-chain-fatty-acid--CoA ligase 1 isoform X1 [Sus scrofa]	Pig.19228	FRMD8-201	FERM domain-containing protein 8 isoform X1 [Sus scrofa]	0.996479	0.194471
Chr15_46857316_46862067	Pig.11174.1	MSTRG.36392,Pig.02709	Pig.11174	circRNA	mRNA	1	0.0315789	0.852134	0.000431967	0.0714832	Chr13_29335(-0.701028793546|-0.667104681107)	MSTRG.36392,Pig.02709	ACSL1-206	long-chain-fatty-acid--CoA ligase 1 isoform X1 [Sus scrofa]	Pig.11174	SEPTIN4	septin-4 isoform X2 [Sus scrofa]	0.975204	0.128429
Chr15_46857316_46862067	Pig.15082.1	MSTRG.36392,Pig.02709	Pig.15082	circRNA	mRNA	1	0.0315789	0.591564	0.0427573	0.223159	Chr02_5821(-0.816921665637|-0.657342657343)	MSTRG.36392,Pig.02709	ACSL1-206	long-chain-fatty-acid--CoA ligase 1 isoform X1 [Sus scrofa]	Pig.15082	MX1-201	RecName: Full=Interferon-induced GTP-binding protein Mx1; AltName: Full=Myxoma resistance protein 1; AltName: Full=Myxovirus resistance protein 1; Contains: RecName: Full=Interferon-induced GTP-binding protein Mx1, N-terminally processedAAA31090.1 Mx protein [Sus scrofa]	0.891757	0.466018
Chr15_46857316_46862067	MSTRG.15722.1	MSTRG.36392,Pig.02709	MSTRG.15722	circRNA	mRNA	1	0.141714	0.78308	0.00259375	0.0962432	Chr03_7854(-0.598606392923|-0.669002777263)	MSTRG.36392,Pig.02709	ACSL1-206	long-chain-fatty-acid--CoA ligase 1 isoform X1 [Sus scrofa]	MSTRG.15722			0.944465	0.140451
Chr15_46857316_46862067	Pig.21160.1	MSTRG.36392,Pig.02709	Pig.21160	circRNA	mRNA	1	0.0315789	0.828936	0.000859082	0.0800441	ssc-miR-1842(-0.626776105532|-0.630473821505)	MSTRG.36392,Pig.02709	ACSL1-206	long-chain-fatty-acid--CoA ligase 1 isoform X1 [Sus scrofa]	Pig.21160	SYNPO	LOW QUALITY PROTEIN: synaptopodin [Sus scrofa]	0.997059	0.111751
Chr15_46857316_46862067	Pig.12687.1	MSTRG.36392,Pig.02709	Pig.12687	circRNA	mRNA	1	0.0614871	0.72537	0.00758833	0.127324	Chr03_7854(-0.598606392923|-0.699300699301)	MSTRG.36392,Pig.02709	ACSL1-206	long-chain-fatty-acid--CoA ligase 1 isoform X1 [Sus scrofa]	Pig.12687	ACCS-201	1-aminocyclopropane-1-carboxylate synthase-like protein 1 isoform X2 [Sus scrofa]	0.922418	0.189638
Chr15_46857316_46862067	Pig.11556.1	MSTRG.36392,Pig.02709	Pig.11556	circRNA	mRNA	1	0.165461	0.680786	0.0148086	0.159036	Chr02_5821(-0.816921665637|-0.679510674288)	MSTRG.36392,Pig.02709	ACSL1-206	long-chain-fatty-acid--CoA ligase 1 isoform X1 [Sus scrofa]	Pig.11556	MKI67	proliferation marker protein Ki-67 isoform X9 [Sus scrofa]	0.908174	0.383772
Chr15_46857316_46862067	Pig.17713.1	MSTRG.36392,Pig.02709	Pig.17713	circRNA	mRNA	1	0.141714	0.851595	0.00043947	0.0714832	Chr03_7854(-0.598606392923|-0.691232325235)	MSTRG.36392,Pig.02709	ACSL1-206	long-chain-fatty-acid--CoA ligase 1 isoform X1 [Sus scrofa]	Pig.17713	FBN3-203	fibrillin-3 [Sus scrofa]	0.928188	0.0952479
Chr15_46857316_46862067	Pig.07590.1	MSTRG.36392,Pig.02709	Pig.07590	circRNA	mRNA	1	0.0315789	0.693955	0.0122977	0.148606	mir-664:ssc-miR-664-3p(-0.72537009966|-0.710287260204)	MSTRG.36392,Pig.02709	ACSL1-206	long-chain-fatty-acid--CoA ligase 1 isoform X1 [Sus scrofa]	Pig.07590	DHH-201	PREDICTED: desert hedgehog protein [Microtus ochrogaster]	0.989494	0.325085
Chr15_46857316_46862067	Pig.11518.1	MSTRG.36392,Pig.02709	Pig.11518	circRNA	mRNA	1	0.0614871	0.732413	0.00675165	0.123576	Chr02_5821(-0.816921665637|-0.692307692308)	MSTRG.36392,Pig.02709	ACSL1-206	long-chain-fatty-acid--CoA ligase 1 isoform X1 [Sus scrofa]	Pig.11518	LOXL3-205	lysyl oxidase homolog 3 isoform X1 [Sus scrofa]	0.917432	0.331504
Chr15_46857316_46862067	Pig.08573.1	MSTRG.36392,Pig.02709	Pig.08573	circRNA	mRNA	1	0.0315789	0.638457	0.0254568	0.189707	ssc-miR-1842(-0.626776105532|-0.812610703272)	MSTRG.36392,Pig.02709	ACSL1-206	long-chain-fatty-acid--CoA ligase 1 isoform X1 [Sus scrofa]	Pig.08573	MIIP-201	migration and invasion-inhibitory protein [Sus scrofa]	0.870893	0.354102
Chr15_46857316_46862067	Pig.18835.1	MSTRG.36392,Pig.02709	Pig.18835	circRNA	mRNA	1	0.187792	0.733696	0.00660693	0.123576	Chr02_5821(-0.816921665637|-0.72504489473)	MSTRG.36392,Pig.02709	ACSL1-206	long-chain-fatty-acid--CoA ligase 1 isoform X1 [Sus scrofa]	Pig.18835	PIK3R6-203	phosphoinositide 3-kinase regulatory subunit 6 isoform X3 [Sus scrofa]	0.940416	0.377733
Chr14_10416412_10425740	Pig.08573.1	Pig.05743	Pig.08573	circRNA	mRNA	1	0.0157895	0.590094	0.0434068	0.225097	ssc-miR-1842(-0.733212166483|-0.812610703272)	Pig.05743	DRG1-202	developmentally-regulated GTP-binding protein 1 [Sus scrofa]	Pig.08573	MIIP-201	migration and invasion-inhibitory protein [Sus scrofa]	0.948637	0.604533
Chr06_10954729_10962523	MSTRG.30891.2	Pig.21061	MSTRG.30891	circRNA	mRNA	1	0.0810916	0.587342	0.0446412	0.225097	mir-361:ssc-miR-361-3p(-0.703360370298|-0.811188811189)	Pig.21061	ACOT11-203	acyl-coenzyme A thioesterase 11 isoform X1 [Sus scrofa]	MSTRG.30891			0.928805	0.546965
Chr06_10954729_10962523	Pig.02564.1	Pig.21061	Pig.02564	circRNA	mRNA	1	0.0105263	0.594593	0.0414408	0.221137	mir-361:ssc-miR-361-3p(-0.703360370298|-0.594405594406)	Pig.21061	ACOT11-203	acyl-coenzyme A thioesterase 11 isoform X1 [Sus scrofa]	Pig.02564	MXD3-201	max dimerization protein 3 [Sus scrofa]	0.916044	0.285805
Chr06_10954729_10962523	MSTRG.21578.1	Pig.21061	MSTRG.21578	circRNA	mRNA	1	0.0515177	0.790374	0.00221511	0.0938036	mir-361:ssc-miR-361-3p(-0.703360370298|-0.776223776224)	Pig.21061	ACOT11-203	acyl-coenzyme A thioesterase 11 isoform X1 [Sus scrofa]	MSTRG.21578			0.950754	0.245001
Chr07_125133345_125178886	MSTRG.30891.2	Pig.13357	MSTRG.30891	circRNA	mRNA	1	0.0810916	0.741259	0.00580115	0.119527	mir-361:ssc-miR-361-3p(-0.811188811189|-0.811188811189)	Pig.13357	MLIP-201	muscular LMNA-interacting protein isoform X3 [Sus scrofa]	MSTRG.30891			1	0.497872
Chr07_125133345_125178886	MSTRG.21578.1	Pig.13357	MSTRG.21578	circRNA	mRNA	1	0.0515177	0.58042	0.047856	0.23044	mir-361:ssc-miR-361-3p(-0.811188811189|-0.776223776224)	Pig.13357	MLIP-201	muscular LMNA-interacting protein isoform X3 [Sus scrofa]	MSTRG.21578			0.977974	0.713989
Scaffold196_740027_766655	MSTRG.30891.2	Pig.14393	MSTRG.30891	circRNA	mRNA	1	0.0810916	0.605649	0.0368796	0.213603	mir-361:ssc-miR-361-3p(-0.65494581814|-0.811188811189)	Pig.14393	PTK2-202	focal adhesion kinase 1 isoform X4 [Sus scrofa]	MSTRG.30891			0.893432	0.437369
Scaffold196_740027_766655	MSTRG.21578.1	Pig.14393	MSTRG.21578	circRNA	mRNA	1	0.0515177	0.598606	0.0397413	0.218822	mir-361:ssc-miR-361-3p(-0.65494581814|-0.776223776224)	Pig.14393	PTK2-202	focal adhesion kinase 1 isoform X4 [Sus scrofa]	MSTRG.21578			0.91526	0.409232
Chr06_144575689_144582720	Pig.09495.1	Pig.14223	Pig.09495	circRNA	mRNA	1	0.0414369	0.598606	0.0397413	0.218822	Chr03_7531(-0.711285243356|-0.671328671329)	Pig.14223	TERB1-201	NEDD8-activating enzyme E1 regulatory subunit [Sus scrofa]	Pig.09495	HSPA12B-202	heat shock 70 kDa protein 12B isoform X2 [Sus scrofa]	0.971101	0.366152
Chr06_144575689_144582720	Pig.08781.1	Pig.14223	Pig.08781	circRNA	mRNA	1	0.0210526	0.683116	0.014339	0.155729	Chr03_7531(-0.711285243356|-0.769230769231)	Pig.14223	TERB1-201	NEDD8-activating enzyme E1 regulatory subunit [Sus scrofa]	Pig.08781	SEMA4B-201	semaphorin-4B [Sus scrofa]	0.960861	0.380371
Chr06_144575689_144582720	Pig.19812.1	Pig.14223	Pig.19812	circRNA	mRNA	1	0.0414369	0.654946	0.0208059	0.174251	Chr03_9544(-0.584521536619|-0.818181818182)	Pig.14223	TERB1-201	NEDD8-activating enzyme E1 regulatory subunit [Sus scrofa]	Pig.19812	SGSH-201	N-sulphoglucosamine sulphohydrolase [Sus scrofa]	0.833421	0.276174
Chr06_144575689_144582720	Pig.21160.1	Pig.14223	Pig.21160	circRNA	mRNA	1	0.0210526	0.726642	0.00743182	0.127324	ssc-miR-1842(-0.809879237485|-0.630473821505)	Pig.14223	TERB1-201	NEDD8-activating enzyme E1 regulatory subunit [Sus scrofa]	Pig.21160	SYNPO	LOW QUALITY PROTEIN: synaptopodin [Sus scrofa]	0.875443	0.252178
Chr06_144575689_144582720	MSTRG.43551.1	Pig.14223	MSTRG.43551	circRNA	mRNA	1	0.0414369	0.6972	0.0117306	0.145686	Chr03_7531(-0.711285243356|-0.699300699301)	Pig.14223	TERB1-201	NEDD8-activating enzyme E1 regulatory subunit [Sus scrofa]	MSTRG.43551			0.991504	0.299556
Chr06_144575689_144582720	Pig.07326.1	Pig.14223	Pig.07326	circRNA	mRNA	1	0.0210526	0.654946	0.0208059	0.174251	Chr03_7531(-0.711285243356|-0.601398601399)	Pig.14223	TERB1-201	NEDD8-activating enzyme E1 regulatory subunit [Sus scrofa]	Pig.07326	ENOX1-201	ecto-NOX disulfide-thiol exchanger 1 isoform X1 [Sus scrofa]	0.916289	0.250412
Chr06_144575689_144582720	Pig.08573.1	Pig.14223	Pig.08573	circRNA	mRNA	1	0.0210526	0.818354	0.00113806	0.0854743	ssc-miR-1842(-0.809879237485|-0.812610703272)	Pig.14223	TERB1-201	NEDD8-activating enzyme E1 regulatory subunit [Sus scrofa]	Pig.08573	MIIP-201	migration and invasion-inhibitory protein [Sus scrofa]	0.998316	0.349649
Chr06_144575689_144582720	Pig.11814.1	Pig.14223	Pig.11814	circRNA	mRNA	1	0.0414369	0.598606	0.0397413	0.218822	Chr03_9544(-0.584521536619|-0.867132867133)	Pig.14223	TERB1-201	NEDD8-activating enzyme E1 regulatory subunit [Sus scrofa]	Pig.11814	NOS2-203	nitric oxide synthase, inducible isoform X1 [Sus scrofa]	0.805318	0.371578
Chr06_144575689_144582720	Pig.12641.1	Pig.14223	Pig.12641	circRNA	mRNA	1	0.0611635	0.704243	0.0105672	0.139892	Chr03_9544(-0.584521536619|-0.839160839161)	Pig.14223	TERB1-201	NEDD8-activating enzyme E1 regulatory subunit [Sus scrofa]	Pig.12641	MUTYH	adenine DNA glycosylase isoform X1 [Sus scrofa]	0.82114	0.219907
Chr09_40350042_40400891	MSTRG.30891.2	Pig.00327	MSTRG.30891	circRNA	mRNA	1	0.117108	0.732365	0.00675706	0.123576	mir-361:ssc-miR-361-3p(-0.609095578402|-0.811188811189)	Pig.00327	CACNA2D1-201	voltage-dependent calcium channel subunit alpha-2/delta-1 isoform X5 [Sus scrofa]	MSTRG.30891			0.857709	0.218613
Chr16_28774233_28776929	Pig.21160.1	Pig.04526	Pig.21160	circRNA	mRNA	1	0.0105263	0.675666	0.0158799	0.161216	ssc-miR-1842(-0.576603742574|-0.630473821505)	Pig.04526	ERGIC1-201	endoplasmic reticulum-Golgi intermediate compartment protein 1 isoform X1 [Sus scrofa]	Pig.21160	SYNPO	LOW QUALITY PROTEIN: synaptopodin [Sus scrofa]	0.955371	0.183485
Chr18_55221402_55260430	MSTRG.30891.2	Pig.17674	MSTRG.30891	circRNA	mRNA	3	0.00156158	0.718328	0.00850036	0.130155	mir-361:ssc-miR-361-3p(-0.781709524876|-0.811188811189);mir-874:ssc-miR-874(-0.577479108467|-0.783216783217);mir-423:ssc-miR-423-5p(-0.683115530748|-0.818181818182)	Pig.17674	SUGCT-201	succinate--hydroxymethylglutarate CoA-transferase [Sus scrofa]	MSTRG.30891			0.998603	0.340104
Chr18_55221402_55260430	Pig.10308.1	Pig.17674	Pig.10308	circRNA	mRNA	1	0.0368421	0.715045	0.00895235	0.1336	mir-29:ssc-miR-29b(-0.591563964771|-0.625667747272)	Pig.17674	SUGCT-201	succinate--hydroxymethylglutarate CoA-transferase [Sus scrofa]	Pig.10308	NTN3-201	LOW QUALITY PROTEIN: netrin-3 [Sus scrofa]	0.971983	0.166638
Chr18_55221402_55260430	MSTRG.21578.1	Pig.17674	MSTRG.21578	circRNA	mRNA	2	0.0107826	0.640861	0.0247359	0.186127	mir-361:ssc-miR-361-3p(-0.781709524876|-0.776223776224);mir-874:ssc-miR-874(-0.577479108467|-0.657342657343)	Pig.17674	SUGCT-201	succinate--hydroxymethylglutarate CoA-transferase [Sus scrofa]	MSTRG.21578			0.997902	0.385198
Chr18_55221402_55260430	Pig.22014.1	Pig.17674	Pig.22014	circRNA	mRNA	1	0.0368421	0.585546	0.0454601	0.227326	mir-361:ssc-miR-361-3p(-0.781709524876|-0.64098171853)	Pig.17674	SUGCT-201	succinate--hydroxymethylglutarate CoA-transferase [Sus scrofa]	Pig.22014	RABL2B	rab-like protein 2A isoform X2 [Sus scrofa]	0.901083	0.409051
Chr18_55221402_55260430	Pig.12620.1	Pig.17674	Pig.12620	circRNA	mRNA	1	0.071345	0.617293	0.0324755	0.205087	mir-423:ssc-miR-423-5p(-0.683115530748|-0.917689673523)	Pig.17674	SUGCT-201	succinate--hydroxymethylglutarate CoA-transferase [Sus scrofa]	Pig.12620	FAAH-201	fatty-acid amide hydrolase 1 [Sus scrofa]	0.853465	0.650363
Chr07_30617232_30635413	Pig.16206.1	Pig.14931	Pig.16206	circRNA	mRNA	1	0.0105263	0.675627	0.0158884	0.161216	mir-10:ssc-miR-125a(-0.65034965035|-0.653832571283)	Pig.14931	EML1-201	echinoderm microtubule-associated protein-like 1 isoform X3 [Sus scrofa]	Pig.16206	DNMT1-202	unnamed protein product [Homo sapiens]	0.997329	0.239962
Chr15_108518521_108523889	Pig.08862.1	Pig.00007	Pig.08862	circRNA	mRNA	1	0.0312448	0.721542	0.00807444	0.128514	Chr03_7531(-0.594405594406|-0.718039630047)	Pig.00007	RAPH1	LOW QUALITY PROTEIN: ras-associated and pleckstrin homology domains-containing protein 1 [Sus scrofa]	Pig.08862	ADAMTSL3-202	ADAMTS-like protein 3 isoform X2 [Sus scrofa]	0.905799	0.194948
Chr15_108518521_108523889	Pig.20585.1	Pig.00007	Pig.20585	circRNA	mRNA	1	0.0463686	0.7986	0.00184042	0.0915734	mir-129:ssc-miR-129a-5p(-0.72027972028|-0.598950130429),ssc-miR-129b(-0.72027972028|-0.598950130429)	Pig.00007	RAPH1	LOW QUALITY PROTEIN: ras-associated and pleckstrin homology domains-containing protein 1 [Sus scrofa]	Pig.20585	TONSL-201	tonsoku-like protein isoform X1 [Sus scrofa]	0.991542	0.137586
Chr15_108518521_108523889	Pig.07973.1	Pig.00007	Pig.07973	circRNA	mRNA	1	0.0312448	0.671329	0.0168315	0.162623	Chr03_7531(-0.594405594406|-0.699300699301)	Pig.00007	RAPH1	LOW QUALITY PROTEIN: ras-associated and pleckstrin homology domains-containing protein 1 [Sus scrofa]	Pig.07973	TMEM94-201	transmembrane protein 94 isoform X6 [Sus scrofa]	0.918919	0.226578
Chr15_108518521_108523889	Pig.13013.1	Pig.00007	Pig.13013	circRNA	mRNA	1	0.0157895	0.809108	0.00143474	0.0868545	Chr12_28101(-0.622377622378|-0.602452762771)	Pig.00007	RAPH1	LOW QUALITY PROTEIN: ras-associated and pleckstrin homology domains-containing protein 1 [Sus scrofa]	Pig.13013	PHGDH-204	D-3-phosphoglycerate dehydrogenase [Sus scrofa]	0.983733	0.114159
Chr15_108518521_108523889	Pig.11947.1	Pig.00007	Pig.11947	circRNA	mRNA	1	0.0157895	0.791595	0.0021561	0.0938036	mir-129:ssc-miR-129a-5p(-0.72027972028|-0.591944865746),ssc-miR-129b(-0.72027972028|-0.591944865746)	Pig.00007	RAPH1	LOW QUALITY PROTEIN: ras-associated and pleckstrin homology domains-containing protein 1 [Sus scrofa]	Pig.11947	SOX10-201	PREDICTED: transcription factor SOX-12 [Orcinus orca]	0.990435	0.138344
Chr15_108518521_108523889	MSTRG.17879.1	Pig.00007	MSTRG.17879	circRNA	mRNA	1	0.0611635	0.687724	0.0134428	0.152597	Chr03_7531(-0.594405594406|-0.740355434643)	Pig.00007	RAPH1	LOW QUALITY PROTEIN: ras-associated and pleckstrin homology domains-containing protein 1 [Sus scrofa]	MSTRG.17879			0.890655	0.229594
Chr15_108518521_108523889	Pig.03438.1	Pig.00007	Pig.03438	circRNA	mRNA	1	0.0157895	0.636364	0.0260969	0.189707	Chr03_7531(-0.594405594406|-0.748251748252)	Pig.00007	RAPH1	LOW QUALITY PROTEIN: ras-associated and pleckstrin homology domains-containing protein 1 [Sus scrofa]	Pig.03438	FAM124A-202	protein FAM124A [Sus scrofa]	0.885417	0.277225
Chr15_108518521_108523889	MSTRG.43551.1	Pig.00007	MSTRG.43551	circRNA	mRNA	1	0.0312448	0.874126	0.000200713	0.0630114	Chr03_7531(-0.594405594406|-0.699300699301)	Pig.00007	RAPH1	LOW QUALITY PROTEIN: ras-associated and pleckstrin homology domains-containing protein 1 [Sus scrofa]	MSTRG.43551			0.918919	0.0765858
Chr15_108518521_108523889	Pig.07326.1	Pig.00007	Pig.07326	circRNA	mRNA	1	0.0157895	0.622378	0.0306759	0.199692	Chr03_7531(-0.594405594406|-0.601398601399)	Pig.00007	RAPH1	LOW QUALITY PROTEIN: ras-associated and pleckstrin homology domains-containing protein 1 [Sus scrofa]	Pig.07326	ENOX1-201	ecto-NOX disulfide-thiol exchanger 1 isoform X1 [Sus scrofa]	0.994152	0.210069
Chr15_108518521_108523889	MSTRG.12124.1	Pig.00007	MSTRG.12124	circRNA	mRNA	2	0.000498587	0.615385	0.0331699	0.205087	Chr12_28101(-0.622377622378|-0.636363636364);Chr03_7531(-0.594405594406|-0.657342657343)	Pig.00007	RAPH1	LOW QUALITY PROTEIN: ras-associated and pleckstrin homology domains-containing protein 1 [Sus scrofa]	MSTRG.12124			0.998674	0.248401
Chr10_58169659_58205038	MSTRG.30891.2	Pig.13795	MSTRG.30891	circRNA	mRNA	1	0.117108	0.629371	0.0283197	0.195771	mir-25:ssc-miR-92a(-0.657342657343|-0.643356643357)	Pig.13795	MINDY3-201	ubiquitin carboxyl-terminal hydrolase MINDY-3 isoform X1 [Sus scrofa]	MSTRG.30891			0.989247	0.271499
Chr13_100681447_100704059	MSTRG.21578.1	Pig.06515	MSTRG.21578	circRNA	mRNA	1	0.0515177	0.619734	0.0316024	0.20192	mir-874:ssc-miR-874(-0.577479108467|-0.657342657343)	Pig.06515	VPS8-202	vacuolar protein sorting-associated protein 8 homolog isoform X2 [Sus scrofa]	MSTRG.21578			0.935324	0.229425
Chr14_55935372_55944958	MSTRG.30891.2	Pig.20327	MSTRG.30891	circRNA	mRNA	1	0.0421053	0.780057	0.00276436	0.0985326	mir-361:ssc-miR-361-3p(-0.720339834423|-0.811188811189)	Pig.20327	EP400-201	PREDICTED: LOW QUALITY PROTEIN: E1A-binding protein p400 [Rhinolophus sinicus]	MSTRG.30891			0.940681	0.297522
Chr06_9792426_9824404	Pig.14610.1	Pig.14725	Pig.14610	circRNA	mRNA	1	0.109663	0.617544	0.0323849	0.205087	Chr02_4243(-0.757894736842|-0.771929824561)	Pig.14725	ZFYVE9-201	zinc finger FYVE domain-containing protein 9 isoform X1 [Sus scrofa]	Pig.14610	AK8-201	adenylate kinase 8 isoform X3 [Sus scrofa]	0.990826	0.539172
Chr06_9792426_9824404	MSTRG.19396.1	Pig.14725	MSTRG.19396	circRNA	mRNA	2	0.0166572	0.630474	0.0279603	0.195771	Chr03_9544(-0.76707648283|-0.853146853147);Chr12_28849(-0.879160717765|-0.587412587413)	Pig.14725	ZFYVE9-201	zinc finger FYVE domain-containing protein 9 isoform X1 [Sus scrofa]	MSTRG.19396			0.978802	0.518401
Chr06_9792426_9824404	Pig.04999.1	Pig.14725	Pig.04999	circRNA	mRNA	1	0.0578947	0.805605	0.00156143	0.0904396	Chr02_4243(-0.757894736842|-0.851139659031)	Pig.14725	ZFYVE9-201	zinc finger FYVE domain-containing protein 9 isoform X1 [Sus scrofa]	Pig.04999	PPOX-201	protoporphyrinogen oxidase isoform X1 [Sus scrofa]	0.942049	0.336844
Chr06_9792426_9824404	Pig.15757.1	Pig.14725	Pig.15757	circRNA	mRNA	1	0.0578947	0.719298	0.00837003	0.129978	Chr02_4243(-0.757894736842|-0.638596491228)	Pig.14725	ZFYVE9-201	zinc finger FYVE domain-containing protein 9 isoform X1 [Sus scrofa]	Pig.15757	SLC22A15-201	solute carrier family 22 member 15 isoform X2 [Sus scrofa]	0.914573	0.250584
Chr06_9792426_9824404	Pig.07970.1	Pig.14725	Pig.07970	circRNA	mRNA	1	0.232484	0.612961	0.0340673	0.207077	Chr12_28849(-0.879160717765|-0.629370629371)	Pig.14725	ZFYVE9-201	zinc finger FYVE domain-containing protein 9 isoform X1 [Sus scrofa]	Pig.07970	LLGL2-202	lethal(2) giant larvae protein homolog 2 [Sus scrofa]	0.834415	0.451899
Chr06_9792426_9824404	Pig.22620.1	Pig.14725	Pig.22620	circRNA	mRNA	1	0.291152	0.760071	0.00411738	0.107867	Chr12_28094(-0.712280701754|-0.72504489473)	Pig.14725	ZFYVE9-201	zinc finger FYVE domain-containing protein 9 isoform X1 [Sus scrofa]	Pig.22620	RGS12-201	LOW QUALITY PROTEIN: regulator of G-protein signaling 12 [Sus scrofa]	0.991119	0.256063
Chr06_9792426_9824404	Pig.06432.1	Pig.14725	Pig.06432	circRNA	mRNA	1	0.109663	0.693521	0.0123749	0.148606	Chr12_28849(-0.879160717765|-0.594405594406)	Pig.14725	ZFYVE9-201	zinc finger FYVE domain-containing protein 9 isoform X1 [Sus scrofa]	Pig.06432	NOTCH3-201	neurogenic locus notch homolog protein 3 [Sus scrofa]	0.806758	0.247433
Chr06_9792426_9824404	Pig.19937.1	Pig.14725	Pig.19937	circRNA	mRNA	1	0.109663	0.630474	0.0279603	0.195771	Chr08_21275(-0.814035087719|-0.630473821505)	Pig.14725	ZFYVE9-201	zinc finger FYVE domain-containing protein 9 isoform X1 [Sus scrofa]	Pig.19937	INTS5-201	LOW QUALITY PROTEIN: integrator complex subunit 5 [Sus scrofa]	0.872925	0.37041
Chr06_9792426_9824404	Pig.03572.1	Pig.14725	Pig.03572	circRNA	mRNA	1	0.155745	0.767076	0.00359618	0.103583	Chr02_4243(-0.757894736842|-0.760071218147)	Pig.14725	ZFYVE9-201	zinc finger FYVE domain-containing protein 9 isoform X1 [Sus scrofa]	Pig.03572	ADAMTS7-201	A disintegrin and metalloproteinase with thrombospondin motifs 7 isoform X1 [Sus scrofa]	0.998566	0.316488
Chr06_9792426_9824404	Pig.20387.1	Pig.14725	Pig.20387	circRNA	mRNA	1	0.109663	0.746061	0.00532943	0.119527	Chr02_6599(-0.57747591545|-0.710611508136)	Pig.14725	ZFYVE9-201	zinc finger FYVE domain-containing protein 9 isoform X1 [Sus scrofa]	Pig.20387	HDHD3-201	haloacid dehalogenase-like hydrolase domain-containing protein 3 [Sus scrofa]	0.896641	0.161637
Chr06_9792426_9824404	Pig.18699.1	Pig.14725	Pig.18699	circRNA	mRNA	1	0.232484	0.767076	0.00359618	0.103583	Chr12_28849(-0.879160717765|-0.762237762238)	Pig.14725	ZFYVE9-201	zinc finger FYVE domain-containing protein 9 isoform X1 [Sus scrofa]	Pig.18699	NCAPD2-202	condensin complex subunit 1 isoform X1 [Sus scrofa]	0.928766	0.452776
Chr06_9792426_9824404	Pig.12266.1	Pig.14725	Pig.12266	circRNA	mRNA	1	0.109663	0.676008	0.0158067	0.160844	Chr12_28849(-0.879160717765|-0.608391608392)	Pig.14725	ZFYVE9-201	zinc finger FYVE domain-containing protein 9 isoform X1 [Sus scrofa]	Pig.12266	PLIN3-201	perilipin-5 [Sus scrofa]	0.817977	0.302823
Chr06_9792426_9824404	Pig.10552.1	Pig.14725	Pig.10552	circRNA	mRNA	2	0.00306321	0.854642	0.000398308	0.0714832	Chr02_4243(-0.757894736842|-0.70402910068);Chr12_28849(-0.879160717765|-0.671328671329)	Pig.14725	ZFYVE9-201	zinc finger FYVE domain-containing protein 9 isoform X1 [Sus scrofa]	Pig.10552	IQGAP3-201	ras GTPase-activating-like protein IQGAP3 isoform X1 [Sus scrofa]	0.990337	0.133783
Chr06_9792426_9824404	Pig.22207.1	Pig.14725	Pig.22207	circRNA	mRNA	1	0.109663	0.739896	0.0059406	0.119527	Chr02_4243(-0.757894736842|-0.762742829963)	Pig.14725	ZFYVE9-201	zinc finger FYVE domain-containing protein 9 isoform X1 [Sus scrofa]	Pig.22207	MYO7A-201	unconventional myosin-VIIa [Sus scrofa]	0.996812	0.356346
Chr06_9792426_9824404	Pig.18741.1	Pig.14725	Pig.18741	circRNA	mRNA	1	0.109663	0.657895	0.0200445	0.173534	Chr12_28849(-0.879160717765|-0.718039630047)	Pig.14725	ZFYVE9-201	zinc finger FYVE domain-containing protein 9 isoform X1 [Sus scrofa]	Pig.18741	AFF2-201	AF4/FMR2 family member 2 isoform X3 [Sus scrofa]	0.899123	0.577625
Chr06_9792426_9824404	Pig.16593.1	Pig.14725	Pig.16593	circRNA	mRNA	1	0.109663	0.755891	0.00445455	0.112606	Chr02_6599(-0.57747591545|-0.675391717366)	Pig.14725	ZFYVE9-201	zinc finger FYVE domain-containing protein 9 isoform X1 [Sus scrofa]	Pig.16593	PGPEP1L-201	pyroglutamyl-peptidase 1-like protein isoform X1 [Sus scrofa]	0.921847	0.148204
Chr06_9792426_9824404	Pig.21446.1	Pig.14725	Pig.21446	circRNA	mRNA	1	0.0578947	0.753066	0.00469389	0.115092	Chr12_28094(-0.712280701754|-0.86865282074)	Pig.14725	ZFYVE9-201	zinc finger FYVE domain-containing protein 9 isoform X1 [Sus scrofa]	Pig.21446	CYBA-201	cytochrome b-245 light chain isoform X1 [Sus scrofa]	0.901089	0.366732
Chr06_9792426_9824404	Pig.00055.1	Pig.14725	Pig.00055	circRNA	mRNA	1	0.0578947	0.616463	0.032776	0.205087	Chr12_28849(-0.879160717765|-0.587412587413)	Pig.14725	ZFYVE9-201	zinc finger FYVE domain-containing protein 9 isoform X1 [Sus scrofa]	Pig.00055	MARS2-202	methionine--tRNA ligase, mitochondrial isoform X1 [Sus scrofa]	0.801068	0.357072
Chr06_9792426_9824404	Pig.03913.1	Pig.14725	Pig.03913	circRNA	mRNA	1	0.0578947	0.637479	0.0257544	0.189707	Chr12_28849(-0.879160717765|-0.65034965035)	Pig.14725	ZFYVE9-201	zinc finger FYVE domain-containing protein 9 isoform X1 [Sus scrofa]	Pig.03913	SPAG8-203	sperm-associated antigen 8 [Sus scrofa]	0.850402	0.455932
Chr06_9792426_9824404	Pig.17052.1	Pig.14725	Pig.17052	circRNA	mRNA	1	0.0578947	0.673684	0.0163097	0.162623	Chr12_28849(-0.879160717765|-0.679510674288)	Pig.14725	ZFYVE9-201	zinc finger FYVE domain-containing protein 9 isoform X1 [Sus scrofa]	Pig.17052	FOXRED2-201	FAD-dependent oxidoreductase domain-containing protein 2 precursor [Sus scrofa]	0.87191	0.455484
Chr06_9792426_9824404	Pig.22561.1	Pig.14725	Pig.22561	circRNA	mRNA	1	0.0578947	0.704029	0.0106012	0.139892	Chr08_21275(-0.814035087719|-0.686515938972)	Pig.14725	ZFYVE9-201	zinc finger FYVE domain-containing protein 9 isoform X1 [Sus scrofa]	Pig.22561	TMEM143-202	transmembrane protein 143 isoform X2 [Sus scrofa]	0.915018	0.360259
Chr06_9792426_9824404	Pig.06643.1	Pig.14725	Pig.06643	circRNA	mRNA	1	0.109663	0.647987	0.0226858	0.18051	Chr02_6599(-0.57747591545|-0.587342164888)	Pig.14725	ZFYVE9-201	zinc finger FYVE domain-containing protein 9 isoform X1 [Sus scrofa]	Pig.06643	ADAMTS12-201	LOW QUALITY PROTEIN: A disintegrin and metalloproteinase with thrombospondin motifs 12 [Sus scrofa]	0.99153	0.180623
Chr06_9792426_9824404	MSTRG.21578.1	Pig.14725	MSTRG.21578	circRNA	mRNA	1	0.232484	0.809108	0.00143474	0.0868545	Chr02_4243(-0.757894736842|-0.735552791755)	Pig.14725	ZFYVE9-201	zinc finger FYVE domain-containing protein 9 isoform X1 [Sus scrofa]	MSTRG.21578			0.98504	0.239748
Chr06_9792426_9824404	MSTRG.34975.2	Pig.14725	MSTRG.34975	circRNA	mRNA	1	0.0578947	0.614035	0.0336674	0.207077	Chr12_28849(-0.879160717765|-0.728547527072)	Pig.14725	ZFYVE9-201	zinc finger FYVE domain-containing protein 9 isoform X1 [Sus scrofa]	MSTRG.34975			0.906318	0.695144
Chr06_9792426_9824404	Pig.18196.1	Pig.14725	Pig.18196	circRNA	mRNA	1	0.263901	0.786557	0.00240758	0.0962432	Chr02_4243(-0.757894736842|-0.686902337826)	Pig.14725	ZFYVE9-201	zinc finger FYVE domain-containing protein 9 isoform X1 [Sus scrofa]	Pig.18196	CFAP46-201	cilia- and flagella-associated protein 46 isoform X3 [Sus scrofa]	0.950863	0.225602
Chr06_9792426_9824404	Pig.12624.1	Pig.14725	Pig.12624	circRNA	mRNA	1	0.109663	0.884211	0.000134551	0.0630114	Chr08_21275(-0.814035087719|-0.663157894737)	Pig.14725	ZFYVE9-201	zinc finger FYVE domain-containing protein 9 isoform X1 [Sus scrofa]	Pig.12624	RAD54L-202	DNA repair and recombination protein RAD54-like [Sus scrofa]	0.897862	0.0920458
Chr06_9792426_9824404	Pig.15469.1	Pig.14725	Pig.15469	circRNA	mRNA	1	0.155745	0.690019	0.0130122	0.149599	Chr02_4243(-0.757894736842|-0.633976453846)	Pig.14725	ZFYVE9-201	zinc finger FYVE domain-containing protein 9 isoform X1 [Sus scrofa]	Pig.15469	ADAMTS14-201	LOW QUALITY PROTEIN: A disintegrin and metalloproteinase with thrombospondin motifs 14 [Sus scrofa]	0.91097	0.274708
Chr06_9792426_9824404	Pig.16786.1	Pig.14725	Pig.16786	circRNA	mRNA	1	0.196555	0.621053	0.0311377	0.201718	Chr12_28849(-0.879160717765|-0.672505409605)	Pig.14725	ZFYVE9-201	zinc finger FYVE domain-containing protein 9 isoform X1 [Sus scrofa]	Pig.16786	TTYH1-201	protein tweety homolog 1 isoform X1 [Sus scrofa]	0.866817	0.53652
Chr06_9792426_9824404	Pig.20023.1	Pig.14725	Pig.20023	circRNA	mRNA	1	0.0578947	0.763574	0.00385009	0.107434	Chr12_28849(-0.879160717765|-0.685314685315)	Pig.14725	ZFYVE9-201	zinc finger FYVE domain-containing protein 9 isoform X1 [Sus scrofa]	Pig.20023	MYADML2-201	myeloid-associated differentiation marker-like protein 2 [Sus scrofa]	0.876095	0.299427
Chr06_9792426_9824404	Pig.19812.1	Pig.14725	Pig.19812	circRNA	mRNA	2	0.00306321	0.7986	0.00184042	0.0915734	Chr03_9544(-0.76707648283|-0.818181818182);Chr08_21275(-0.814035087719|-0.690018571313)	Pig.14725	ZFYVE9-201	zinc finger FYVE domain-containing protein 9 isoform X1 [Sus scrofa]	Pig.19812	SGSH-201	N-sulphoglucosamine sulphohydrolase [Sus scrofa]	0.996081	0.285057
Chr06_9792426_9824404	Pig.14704.1	Pig.14725	Pig.14704	circRNA	mRNA	1	0.109663	0.6655	0.0181751	0.168318	Chr12_28849(-0.879160717765|-0.657342657343)	Pig.14725	ZFYVE9-201	zinc finger FYVE domain-containing protein 9 isoform X1 [Sus scrofa]	Pig.14704	PLXND1-201	plexin-D1 isoform X1 [Sus scrofa]	0.855635	0.421588
Chr06_9792426_9824404	Pig.18305.1	Pig.14725	Pig.18305	circRNA	mRNA	1	0.196555	0.830124	0.000831418	0.0795415	Chr18_40848(-0.609704133523|-0.587281589659)	Pig.14725	ZFYVE9-201	zinc finger FYVE domain-containing protein 9 isoform X1 [Sus scrofa]	Pig.18305	CYGB	cytoglobin isoform X1 [Sus scrofa]	0.981267	0.0943075
Chr06_9792426_9824404	MSTRG.34668.1	Pig.14725	MSTRG.34668	circRNA	mRNA	1	0.0578947	0.790135	0.00222682	0.0938036	Chr12_28849(-0.879160717765|-0.721848885584)	Pig.14725	ZFYVE9-201	zinc finger FYVE domain-containing protein 9 isoform X1 [Sus scrofa]	MSTRG.34668			0.901742	0.318567
Chr06_9792426_9824404	Pig.14276.1	Pig.14725	Pig.14276	circRNA	mRNA	1	0.0578947	0.58494	0.0457391	0.227326	Chr02_4243(-0.757894736842|-0.756568585805)	Pig.14725	ZFYVE9-201	zinc finger FYVE domain-containing protein 9 isoform X1 [Sus scrofa]	Pig.14276	DDX28-201	probable ATP-dependent RNA helicase DDX28 [Sus scrofa]	0.999124	0.557888
Chr06_9792426_9824404	Pig.10835.1	Pig.14725	Pig.10835	circRNA	mRNA	2	0.0264187	0.631579	0.0276035	0.195771	Chr03_9544(-0.76707648283|-0.844134394348);Chr12_28849(-0.879160717765|-0.605955395113)	Pig.14725	ZFYVE9-201	zinc finger FYVE domain-containing protein 9 isoform X1 [Sus scrofa]	Pig.10835	DISP1-201	protein dispatched homolog 1 isoform X3 [Sus scrofa]	0.981935	0.524367
Chr06_9792426_9824404	Pig.02310.1	Pig.14725	Pig.02310	circRNA	mRNA	1	0.109663	0.667902	0.0176121	0.166709	Chr02_6599(-0.57747591545|-0.669280500039)	Pig.14725	ZFYVE9-201	zinc finger FYVE domain-containing protein 9 isoform X1 [Sus scrofa]	Pig.02310	HDC-201	histidine decarboxylase isoform X1 [Sus scrofa]	0.926365	0.20399
Chr06_9792426_9824404	Pig.12679.1	Pig.14725	Pig.12679	circRNA	mRNA	1	0.109663	0.742558	0.00567053	0.119527	Chr12_28849(-0.879160717765|-0.65034965035)	Pig.14725	ZFYVE9-201	zinc finger FYVE domain-containing protein 9 isoform X1 [Sus scrofa]	Pig.12679	TIE1-201	tyrosine-protein kinase receptor Tie-1 isoform X6 [Sus scrofa]	0.850402	0.270726
Chr06_9792426_9824404	Pig.15860.1	Pig.14725	Pig.15860	circRNA	mRNA	1	0.263901	0.619298	0.0317569	0.201944	Chr12_28849(-0.879160717765|-0.588442233404)	Pig.14725	ZFYVE9-201	zinc finger FYVE domain-containing protein 9 isoform X1 [Sus scrofa]	Pig.15860	BSN-201	protein bassoon isoform X2 [Sus scrofa]	0.801909	0.354658
Chr06_9792426_9824404	Pig.10509.1	Pig.14725	Pig.10509	circRNA	mRNA	2	0.00306321	0.623469	0.0302994	0.199692	Chr08_21275(-0.814035087719|-0.718039630047);Chr12_28849(-0.879160717765|-0.783216783217)	Pig.14725	ZFYVE9-201	zinc finger FYVE domain-containing protein 9 isoform X1 [Sus scrofa]	Pig.10509	CCDC42-201	dolichol-phosphate mannosyltransferase subunit 3 [Sus scrofa]	0.996372	0.685152
Chr06_9792426_9824404	Pig.09950.1	Pig.14725	Pig.09950	circRNA	mRNA	1	0.0578947	0.810526	0.00138575	0.0868324	Chr12_28849(-0.879160717765|-0.70402910068)	Pig.14725	ZFYVE9-201	zinc finger FYVE domain-containing protein 9 isoform X1 [Sus scrofa]	Pig.09950	FANCC	Fanconi anemia group C protein isoform X1 [Sus scrofa]	0.889381	0.244441
Chr06_9792426_9824404	Pig.18822.1	Pig.14725	Pig.18822	circRNA	mRNA	1	0.109663	0.767076	0.00359618	0.103583	Chr12_28849(-0.879160717765|-0.685314685315)	Pig.14725	ZFYVE9-201	zinc finger FYVE domain-containing protein 9 isoform X1 [Sus scrofa]	Pig.18822	CTC1	LOW QUALITY PROTEIN: CST complex subunit CTC1 [Sus scrofa]	0.876095	0.292836
Chr06_9792426_9824404	Pig.07425.1	Pig.14725	Pig.07425	circRNA	mRNA	1	0.109663	0.858145	0.000354759	0.0703934	Chr08_21275(-0.814035087719|-0.654992247896)	Pig.14725	ZFYVE9-201	zinc finger FYVE domain-containing protein 9 isoform X1 [Sus scrofa]	Pig.07425	MYBL2-201	myb-related protein B [Sus scrofa]	0.891736	0.117727
Chr06_9792426_9824404	Pig.07708.1	Pig.14725	Pig.07708	circRNA	mRNA	1	0.0578947	0.697024	0.011761	0.145686	Chr12_28849(-0.879160717765|-0.692307692308)	Pig.14725	ZFYVE9-201	zinc finger FYVE domain-containing protein 9 isoform X1 [Sus scrofa]	Pig.07708	PDE1B-201	calcium/calmodulin-dependent 3',5'-cyclic nucleotide phosphodiesterase 1B isoform X1 [Sus scrofa]	0.881097	0.440019
Chr06_9792426_9824404	Pig.15350.1	Pig.14725	Pig.15350	circRNA	mRNA	1	0.109663	0.662567	0.0188803	0.170274	Chr02_6599(-0.57747591545|-0.578491705004)	Pig.14725	ZFYVE9-201	zinc finger FYVE domain-containing protein 9 isoform X1 [Sus scrofa]	Pig.15350	SLC43A1-201	LOW QUALITY PROTEIN: large neutral amino acids transporter small subunit 3 [Sus scrofa]	0.999121	0.169272
Chr06_9792426_9824404	Pig.15616.1	Pig.14725	Pig.15616	circRNA	mRNA	1	0.0578947	0.73205	0.00679293	0.123576	Chr12_28849(-0.879160717765|-0.776223776224)	Pig.14725	ZFYVE9-201	zinc finger FYVE domain-containing protein 9 isoform X1 [Sus scrofa]	Pig.15616	SNX17-201	PREDICTED: sorting nexin-17 isoform X1 [Trichechus manatus latirostris]	0.937817	0.566871
Chr06_9792426_9824404	Pig.21628.1	Pig.14725	Pig.21628	circRNA	mRNA	1	0.0578947	0.673684	0.0163097	0.162623	Chr02_4243(-0.757894736842|-0.645614035088)	Pig.14725	ZFYVE9-201	zinc finger FYVE domain-containing protein 9 isoform X1 [Sus scrofa]	Pig.21628	ADGRL1-201	adhesion G protein-coupled receptor L1 isoform X1 [Sus scrofa]	0.92	0.303596
Chr06_9792426_9824404	Pig.12644.1	Pig.14725	Pig.12644	circRNA	mRNA	1	0.0578947	0.819616	0.00110155	0.0854743	Chr12_28849(-0.879160717765|-0.804195804196)	Pig.14725	ZFYVE9-201	zinc finger FYVE domain-containing protein 9 isoform X1 [Sus scrofa]	Pig.12644	UROD-201	uroporphyrinogen decarboxylase [Sus scrofa]	0.955467	0.422064
Chr06_9792426_9824404	MSTRG.20872.1	Pig.14725	MSTRG.20872	circRNA	mRNA	1	0.155745	0.612961	0.0340673	0.207077	Chr02_4243(-0.757894736842|-0.658494880238)	Pig.14725	ZFYVE9-201	zinc finger FYVE domain-containing protein 9 isoform X1 [Sus scrofa]	MSTRG.20872			0.929822	0.380989
Chr06_9792426_9824404	Pig.09306.1	Pig.14725	Pig.09306	circRNA	mRNA	2	0.00874971	0.817544	0.00116197	0.0854743	Chr12_28849(-0.879160717765|-0.858144923714);Chr02_4243(-0.757894736842|-0.750877192982)	Pig.14725	ZFYVE9-201	zinc finger FYVE domain-containing protein 9 isoform X1 [Sus scrofa]	Pig.09306	PTK7-201	inactive tyrosine-protein kinase 7 [Sus scrofa]	0.999916	0.400262
Chr06_9792426_9824404	Pig.01857.1	Pig.14725	Pig.01857	circRNA	mRNA	1	0.0578947	0.647987	0.0226858	0.18051	Chr03_9544(-0.76707648283|-0.832167832168)	Pig.14725	ZFYVE9-201	zinc finger FYVE domain-containing protein 9 isoform X1 [Sus scrofa]	Pig.01857	SRPX-204	sushi repeat-containing protein SRPX isoform X1 [Sus scrofa]	0.959299	0.62086
Chr06_9792426_9824404	Pig.03052.1	Pig.14725	Pig.03052	circRNA	mRNA	1	0.155745	0.711034	0.00952876	0.134875	Chr03_9544(-0.76707648283|-0.839160839161)	Pig.14725	ZFYVE9-201	zinc finger FYVE domain-containing protein 9 isoform X1 [Sus scrofa]	Pig.03052	MTMR9	myotubularin-related protein 9 [Sus scrofa]	0.955122	0.518063
Chr06_9792426_9824404	Pig.12256.1	Pig.14725	Pig.12256	circRNA	mRNA	1	0.155745	0.833626	0.000753851	0.0795415	mir-1839:ssc-miR-183(-0.732050159414|-0.657342657343)	Pig.14725	ZFYVE9-201	zinc finger FYVE domain-containing protein 9 isoform X1 [Sus scrofa]	Pig.12256	UHRF1-201	E3 ubiquitin-protein ligase UHRF1 [Sus scrofa]	0.94623	0.147166
Chr06_9792426_9824404	MSTRG.12911.1	Pig.14725	MSTRG.12911	circRNA	mRNA	1	0.0578947	0.728548	0.00720175	0.127324	Chr12_28094(-0.712280701754|-0.633976453846)	Pig.14725	ZFYVE9-201	zinc finger FYVE domain-containing protein 9 isoform X1 [Sus scrofa]	MSTRG.12911			0.941836	0.218282
Chr06_9792426_9824404	Pig.21160.1	Pig.14725	Pig.21160	circRNA	mRNA	1	0.0578947	0.705263	0.0104061	0.139892	ssc-miR-1842(-0.711034365363|-0.630473821505)	Pig.14725	ZFYVE9-201	zinc finger FYVE domain-containing protein 9 isoform X1 [Sus scrofa]	Pig.21160	SYNPO	LOW QUALITY PROTEIN: synaptopodin [Sus scrofa]	0.939948	0.23444
Chr06_9792426_9824404	Pig.20477.1	Pig.14725	Pig.20477	circRNA	mRNA	1	0.109663	0.654992	0.0207937	0.174251	Chr02_4243(-0.757894736842|-0.788092276881)	Pig.14725	ZFYVE9-201	zinc finger FYVE domain-containing protein 9 isoform X1 [Sus scrofa]	Pig.20477	VRK3-202	inactive serine/threonine-protein kinase VRK3 [Sus scrofa]	0.980467	0.511305
Chr06_9792426_9824404	Pig.15852.1	Pig.14725	Pig.15852	circRNA	mRNA	1	0.109663	0.75614	0.00443383	0.112606	Chr12_28849(-0.879160717765|-0.812610703272)	Pig.14725	ZFYVE9-201	zinc finger FYVE domain-containing protein 9 isoform X1 [Sus scrofa]	Pig.15852	UBA7-201	ubiquitin-like modifier-activating enzyme 7 [Sus scrofa]	0.960663	0.605901
Chr06_9792426_9824404	Pig.14753.1	Pig.14725	Pig.14753	circRNA	mRNA	1	0.109663	0.704029	0.0106012	0.139892	Chr08_21275(-0.814035087719|-0.693521203655)	Pig.14725	ZFYVE9-201	zinc finger FYVE domain-containing protein 9 isoform X1 [Sus scrofa]	Pig.14753	VWCE-201	von Willebrand factor C and EGF domain-containing protein isoform X1 [Sus scrofa]	0.92006	0.3707
Chr06_9792426_9824404	Pig.17713.1	Pig.14725	Pig.17713	circRNA	mRNA	2	0.0264187	0.725836	0.0075307	0.127324	mir-1839:ssc-miR-183(-0.732050159414|-0.663161977002);Chr12_28849(-0.879160717765|-0.659653183473)	Pig.14725	ZFYVE9-201	zinc finger FYVE domain-containing protein 9 isoform X1 [Sus scrofa]	Pig.17713	FBN3-203	fibrillin-3 [Sus scrofa]	0.988607	0.286452
Chr06_9792426_9824404	MSTRG.30061.2	Pig.14725	MSTRG.30061	circRNA	mRNA	2	0.0264187	0.585965	0.0452682	0.227083	Chr08_21275(-0.814035087719|-0.722807017544);Chr12_28849(-0.879160717765|-0.595447498088)	Pig.14725	ZFYVE9-201	zinc finger FYVE domain-containing protein 9 isoform X1 [Sus scrofa]	MSTRG.30061			0.979729	0.507397
Chr06_9792426_9824404	Pig.18928.1	Pig.14725	Pig.18928	circRNA	mRNA	1	0.0578947	0.833626	0.000753851	0.0795415	mir-664:ssc-miR-664-5p(-0.595447498088|-0.629370629371)	Pig.14725	ZFYVE9-201	zinc finger FYVE domain-containing protein 9 isoform X1 [Sus scrofa]	Pig.18928	ISG12(A)-202	uncharacterized protein LOC100153902 [Sus scrofa]	0.972304	0.0986381
Chr06_9792426_9824404	Pig.03444.1	Pig.14725	Pig.03444	circRNA	mRNA	1	0.109663	0.614035	0.0336674	0.207077	Chr12_28849(-0.879160717765|-0.633976453846)	Pig.14725	ZFYVE9-201	zinc finger FYVE domain-containing protein 9 isoform X1 [Sus scrofa]	Pig.03444	ATP7A-203	LOW QUALITY PROTEIN: copper-transporting ATPase 2 [Sus scrofa]	0.837963	0.460264
Chr06_9792426_9824404	Pig.09158.1	Pig.14725	Pig.09158	circRNA	mRNA	1	0.155745	0.591945	0.0425902	0.223159	Chr12_28849(-0.879160717765|-0.65034965035)	Pig.14725	ZFYVE9-201	zinc finger FYVE domain-containing protein 9 isoform X1 [Sus scrofa]	Pig.09158	SLC12A9-201	solute carrier family 12 member 9 isoform X1 [Sus scrofa]	0.850402	0.536188
Chr06_9792426_9824404	Pig.08573.1	Pig.14725	Pig.08573	circRNA	mRNA	1	0.0578947	0.736842	0.00626216	0.123344	ssc-miR-1842(-0.711034365363|-0.812610703272)	Pig.14725	ZFYVE9-201	zinc finger FYVE domain-containing protein 9 isoform X1 [Sus scrofa]	Pig.08573	MIIP-201	migration and invasion-inhibitory protein [Sus scrofa]	0.933333	0.348736
Chr06_9792426_9824404	Pig.18835.1	Pig.14725	Pig.18835	circRNA	mRNA	1	0.291152	0.791228	0.0021737	0.0938036	Chr02_4243(-0.757894736842|-0.814035087719)	Pig.14725	ZFYVE9-201	zinc finger FYVE domain-containing protein 9 isoform X1 [Sus scrofa]	Pig.18835	PIK3R6-203	phosphoinositide 3-kinase regulatory subunit 6 isoform X3 [Sus scrofa]	0.964286	0.331291
Chr06_9792426_9824404	Pig.16377.1	Pig.14725	Pig.16377	circRNA	mRNA	1	0.0578947	0.711034	0.00952876	0.134875	Chr12_28849(-0.879160717765|-0.692307692308)	Pig.14725	ZFYVE9-201	zinc finger FYVE domain-containing protein 9 isoform X1 [Sus scrofa]	Pig.16377	LZTS2-201	PREDICTED: leucine zipper putative tumor suppressor 2 isoform X1 [Equus caballus]	0.881097	0.413285
Chr06_9792426_9824404	Pig.11814.1	Pig.14725	Pig.11814	circRNA	mRNA	1	0.109663	0.644484	0.0236773	0.183841	Chr03_9544(-0.76707648283|-0.867132867133)	Pig.14725	ZFYVE9-201	zinc finger FYVE domain-containing protein 9 isoform X1 [Sus scrofa]	Pig.11814	NOS2-203	nitric oxide synthase, inducible isoform X1 [Sus scrofa]	0.938774	0.709179
Chr06_9792426_9824404	Pig.12641.1	Pig.14725	Pig.12641	circRNA	mRNA	1	0.155745	0.742558	0.00567053	0.119527	Chr03_9544(-0.76707648283|-0.839160839161)	Pig.14725	ZFYVE9-201	zinc finger FYVE domain-containing protein 9 isoform X1 [Sus scrofa]	Pig.12641	MUTYH	adenine DNA glycosylase isoform X1 [Sus scrofa]	0.955122	0.459243
Chr06_9792426_9824404	MSTRG.21693.1	Pig.14725	MSTRG.21693	circRNA	mRNA	1	0.232484	0.596491	0.0406307	0.221137	Chr12_28094(-0.712280701754|-0.652631578947)	Pig.14725	ZFYVE9-201	zinc finger FYVE domain-containing protein 9 isoform X1 [Sus scrofa]	MSTRG.21693			0.956298	0.348969
Chr06_9792426_9824404	MSTRG.10050.1	Pig.14725	MSTRG.10050	circRNA	mRNA	1	0.109663	0.617544	0.0323849	0.205087	Chr12_28849(-0.879160717765|-0.718039630047)	Pig.14725	ZFYVE9-201	zinc finger FYVE domain-containing protein 9 isoform X1 [Sus scrofa]	MSTRG.10050			0.899123	0.658936
Chr06_9792426_9824404	Pig.17786.1	Pig.14725	Pig.17786	circRNA	mRNA	1	0.0578947	0.73205	0.00679293	0.123576	Chr02_4243(-0.757894736842|-0.72504489473)	Pig.14725	ZFYVE9-201	zinc finger FYVE domain-containing protein 9 isoform X1 [Sus scrofa]	Pig.17786	PRKD2-201	uncharacterized protein LOC110261743 [Sus scrofa]	0.977848	0.325762
Chr06_9792426_9824404	Pig.09740.1	Pig.14725	Pig.09740	circRNA	mRNA	1	0.155745	0.589791	0.0435417	0.225097	Chr02_4243(-0.757894736842|-0.644065706022)	Pig.14725	ZFYVE9-201	zinc finger FYVE domain-containing protein 9 isoform X1 [Sus scrofa]	Pig.09740	CARMIL3-201	LOW QUALITY PROTEIN: capping protein, Arp2/3 and myosin-I linker protein 3 [Sus scrofa]	0.918807	0.38609
ChrX_124837765_124858706	MSTRG.30891.2	Pig.17963	MSTRG.30891	circRNA	mRNA	1	0.0810916	0.755245	0.00450844	0.112606	mir-361:ssc-miR-361-3p(-0.804195804196|-0.811188811189)	Pig.17963	MTM1-201	myotubularin isoform X4 [Sus scrofa]	MSTRG.30891			0.995671	0.459222
ChrX_124837765_124858706	MSTRG.21578.1	Pig.17963	MSTRG.21578	circRNA	mRNA	1	0.0515177	0.692308	0.012593	0.148606	mir-361:ssc-miR-361-3p(-0.804195804196|-0.776223776224)	Pig.17963	MTM1-201	myotubularin isoform X4 [Sus scrofa]	MSTRG.21578			0.982301	0.510648
Chr05_86983163_86990803	Pig.10509.1	MSTRG.14516,Pig.04081	Pig.10509	circRNA	mRNA	1	0.0312448	0.667105	0.0177977	0.168245	Chr12_28849(-0.609095578402|-0.783216783217)	MSTRG.14516,Pig.04081	VEZT-201	vezatin isoform X4 [Sus scrofa]	Pig.10509	CCDC42-201	dolichol-phosphate mannosyltransferase subunit 3 [Sus scrofa]	0.874941	0.28169
Chr11_73469919_73470694	Pig.06432.1		Pig.06432	circRNA	mRNA	1	0.0105263	0.65035	0.0220342	0.178309	mir-181:ssc-miR-181b(-0.783216783217|-0.608391608392)				Pig.06432	NOTCH3-201	neurogenic locus notch homolog protein 3 [Sus scrofa]	0.874372	0.298035
Chr07_61145319_61181711	Pig.21160.1	Pig.04303	Pig.21160	circRNA	mRNA	1	0.0263158	0.581108	0.0475293	0.23044	ssc-miR-1842(-0.667104681107|-0.630473821505)	Pig.04303	GPHN-207	gephyrin isoform X1 [Sus scrofa]	Pig.21160	SYNPO	LOW QUALITY PROTEIN: synaptopodin [Sus scrofa]	0.97177	0.303518
Chr07_61145319_61181711	Pig.08573.1	Pig.04303	Pig.08573	circRNA	mRNA	1	0.0263158	0.704593	0.0105117	0.139892	ssc-miR-1842(-0.667104681107|-0.812610703272)	Pig.04303	GPHN-207	gephyrin isoform X1 [Sus scrofa]	Pig.08573	MIIP-201	migration and invasion-inhibitory protein [Sus scrofa]	0.901666	0.330323
Chr03_96765182_96791365	MSTRG.30891.2	Pig.10269,MSTRG.9426	MSTRG.30891	circRNA	mRNA	1	0.117108	0.812611	0.0013161	0.0864374	Chr07_17502(-0.64098171853|-0.811188811189)	Pig.10269,MSTRG.9426	UNKL	putative E3 ubiquitin-protein ligase UNKL isoform X1 [Sus scrofa]	MSTRG.30891			0.882791	0.16061
Chr03_96765182_96791365	MSTRG.17961.3	Pig.10269,MSTRG.9426	MSTRG.17961	circRNA	mRNA	1	0.0157895	0.739055	0.00602782	0.119527	Chr07_17502(-0.64098171853|-0.874125874126)	Pig.10269,MSTRG.9426	UNKL	putative E3 ubiquitin-protein ligase UNKL isoform X1 [Sus scrofa]	MSTRG.17961			0.84612	0.25956
Chr03_96765182_96791365	Pig.09736.1	Pig.10269,MSTRG.9426	Pig.09736	circRNA	mRNA	1	0.0157895	0.739055	0.00602782	0.119527	Chr07_17502(-0.64098171853|-0.762237762238)	Pig.10269,MSTRG.9426	UNKL	putative E3 ubiquitin-protein ligase UNKL isoform X1 [Sus scrofa]	Pig.09736	FITM1-201	hypothetical protein PANDA_009946, partial [Ailuropoda melanoleuca]	0.913587	0.234916
Chr03_96765182_96791365	Pig.09067.1	Pig.10269,MSTRG.9426	Pig.09067	circRNA	mRNA	1	0.0157895	0.606328	0.0366117	0.213363	mir-331:ssc-miR-331-3p(-0.591944865746|-0.75088181523)	Pig.10269,MSTRG.9426	UNKL	putative E3 ubiquitin-protein ligase UNKL isoform X1 [Sus scrofa]	Pig.09067	PMS2-201	mismatch repair endonuclease PMS2 isoform X1 [Sus scrofa]	0.88164	0.302274
Chr03_96765182_96791365	Pig.11420.1	Pig.10269,MSTRG.9426	Pig.11420	circRNA	mRNA	1	0.0157895	0.622807	0.0305273	0.199692	Chr07_17502(-0.64098171853|-0.669002777263)	Pig.10269,MSTRG.9426	UNKL	putative E3 ubiquitin-protein ligase UNKL isoform X1 [Sus scrofa]	Pig.11420	CCHCR1-201	coiled-coil alpha-helical rod protein 1 isoform X1 [Sus scrofa]	0.97861	0.282771
Chr14_130302807_130326074	MSTRG.17795.1	Pig.12080	MSTRG.17795	circRNA	mRNA	1	0.0157895	0.5944	0.0415238	0.221137	mir-331:ssc-miR-331-3p(-0.615755848551|-0.629370629371)	Pig.12080	HTRA3-201	LOW QUALITY PROTEIN: serine protease HTRA1 [Sus scrofa]	MSTRG.17795			0.989066	0.256562
Chr14_130302807_130326074	Pig.14514.1	Pig.12080	Pig.14514	circRNA	mRNA	1	0.0157895	0.670318	0.017059	0.164599	Chr13_30396(-0.686941495782|-0.742558056439)	Pig.12080	HTRA3-201	LOW QUALITY PROTEIN: serine protease HTRA1 [Sus scrofa]	Pig.14514	FAAP24-201	Fanconi anemia core complex-associated protein 24 [Sus scrofa]	0.961094	0.341139
Chr14_130302807_130326074	Pig.09067.1	Pig.12080	Pig.09067	circRNA	mRNA	1	0.0157895	0.794724	0.00201037	0.0924511	mir-331:ssc-miR-331-3p(-0.615755848551|-0.75088181523)	Pig.12080	HTRA3-201	LOW QUALITY PROTEIN: serine protease HTRA1 [Sus scrofa]	Pig.09067	PMS2-201	mismatch repair endonuclease PMS2 isoform X1 [Sus scrofa]	0.901125	0.156032
Chr10_58174995_58205038	MSTRG.30891.2	Pig.13795	MSTRG.30891	circRNA	mRNA	1	0.0421053	0.608392	0.035806	0.209995	mir-25:ssc-miR-92a(-0.79020979021|-0.643356643357)	Pig.13795	MINDY3-201	ubiquitin carboxyl-terminal hydrolase MINDY-3 isoform X1 [Sus scrofa]	MSTRG.30891			0.897561	0.395238
Chr03_77822466_77840328	Pig.17909.1	MSTRG.8700,Pig.09456	Pig.17909	circRNA	mRNA	1	0.0368421	0.612961	0.0340673	0.207077	mir-504:ssc-miR-504(-0.818181818182|-0.644484350871)	MSTRG.8700,Pig.09456	REV1-202	DNA repair protein REV1 isoform X1 [Sus scrofa]	Pig.17909	PARP12-201	poly [ADP-ribose]	0.881246	0.418123
Chr03_77822466_77840328	Pig.02404.1	MSTRG.8700,Pig.09456	Pig.02404	circRNA	mRNA	1	0.103602	0.636364	0.0260969	0.189707	Chr02_7181(-0.879160717765|-0.588442233404)	MSTRG.8700,Pig.09456	REV1-202	DNA repair protein REV1 isoform X1 [Sus scrofa]	Pig.02404	NRK-202	nik-related protein kinase isoform X1 [Sus scrofa]	0.801909	0.327431
Chr03_77822466_77840328	Pig.19937.1	MSTRG.8700,Pig.09456	Pig.19937	circRNA	mRNA	1	0.071345	0.643357	0.0240032	0.183841	Chr02_7181(-0.879160717765|-0.735552791755)	MSTRG.8700,Pig.09456	REV1-202	DNA repair protein REV1 isoform X1 [Sus scrofa]	Pig.19937	INTS5-201	LOW QUALITY PROTEIN: integrator complex subunit 5 [Sus scrofa]	0.911063	0.653617
Chr03_77822466_77840328	Pig.18656.1	MSTRG.8700,Pig.09456	Pig.18656	circRNA	mRNA	1	0.00341545	0.762238	0.00395045	0.107434	mir-504:ssc-miR-504(-0.818181818182|-0.748251748252)	MSTRG.8700,Pig.09456	REV1-202	DNA repair protein REV1 isoform X1 [Sus scrofa]	Pig.18656	ARRB2-201	beta-arrestin-2 isoform X3 [Sus scrofa]	0.955357	0.368904
Chr03_77822466_77840328	Pig.21446.1	MSTRG.8700,Pig.09456	Pig.21446	circRNA	mRNA	1	0.0368421	0.783217	0.00258621	0.0962432	Chr12_28094(-0.809108070931|-0.86865282074)	MSTRG.8700,Pig.09456	REV1-202	DNA repair protein REV1 isoform X1 [Sus scrofa]	Pig.21446	CYBA-201	cytochrome b-245 light chain isoform X1 [Sus scrofa]	0.964509	0.507119
Chr03_77822466_77840328	MSTRG.17795.1	MSTRG.8700,Pig.09456	MSTRG.17795	circRNA	mRNA	1	0.0368421	0.692308	0.012593	0.148606	mir-331:ssc-miR-331-3p(-0.587412587413|-0.629370629371)	MSTRG.8700,Pig.09456	REV1-202	DNA repair protein REV1 isoform X1 [Sus scrofa]	MSTRG.17795			0.965517	0.179338
Chr03_77822466_77840328	Pig.08781.1	MSTRG.8700,Pig.09456	Pig.08781	circRNA	mRNA	1	0.0368421	0.608392	0.035806	0.209995	Chr03_7531(-0.699300699301|-0.769230769231)	MSTRG.8700,Pig.09456	REV1-202	DNA repair protein REV1 isoform X1 [Sus scrofa]	Pig.08781	SEMA4B-201	semaphorin-4B [Sus scrofa]	0.952381	0.454112
Chr03_77822466_77840328	Pig.11482.1	MSTRG.8700,Pig.09456	Pig.11482	circRNA	mRNA	1	0.0368421	0.762238	0.00395045	0.107434	mir-504:ssc-miR-504(-0.818181818182|-0.664335664336)	MSTRG.8700,Pig.09456	REV1-202	DNA repair protein REV1 isoform X1 [Sus scrofa]	Pig.11482	SMYD5-201	homeobox protein notochord [Sus scrofa]	0.896226	0.253353
Chr03_77822466_77840328	Pig.08095.1	MSTRG.8700,Pig.09456	Pig.08095	circRNA	mRNA	1	0.0368421	0.664336	0.0184527	0.168318	Chr02_7181(-0.879160717765|-0.665500144921)	MSTRG.8700,Pig.09456	REV1-202	DNA repair protein REV1 isoform X1 [Sus scrofa]	Pig.08095	CTHRC1-202	collagen triple helix repeat-containing protein 1 [Sus scrofa]	0.861678	0.44151
Chr03_77822466_77840328	Pig.04569.1	MSTRG.8700,Pig.09456	Pig.04569	circRNA	mRNA	1	0.0368421	0.595447	0.0410748	0.221137	Chr02_7181(-0.879160717765|-0.677192982456)	MSTRG.8700,Pig.09456	REV1-202	DNA repair protein REV1 isoform X1 [Sus scrofa]	Pig.04569	C1QTNF2-201	PREDICTED: complement C1q tumor necrosis factor-related protein 2 [Bos taurus]	0.87023	0.595202
Chr03_77822466_77840328	Pig.12620.1	MSTRG.8700,Pig.09456	Pig.12620	circRNA	mRNA	1	0.071345	0.777584	0.00291017	0.100207	Chr02_7181(-0.879160717765|-0.79298245614)	MSTRG.8700,Pig.09456	REV1-202	DNA repair protein REV1 isoform X1 [Sus scrofa]	Pig.12620	FAAH-201	fatty-acid amide hydrolase 1 [Sus scrofa]	0.948462	0.500562
Chr03_77822466_77840328	Pig.09067.1	MSTRG.8700,Pig.09456	Pig.09067	circRNA	mRNA	1	0.0368421	0.733338	0.0066471	0.123576	mir-331:ssc-miR-331-3p(-0.587412587413|-0.75088181523)	MSTRG.8700,Pig.09456	REV1-202	DNA repair protein REV1 isoform X1 [Sus scrofa]	Pig.09067	PMS2-201	mismatch repair endonuclease PMS2 isoform X1 [Sus scrofa]	0.877853	0.186528
Chr03_77822466_77840328	MSTRG.43551.1	MSTRG.8700,Pig.09456	MSTRG.43551	circRNA	mRNA	1	0.071345	0.72028	0.00823977	0.128514	Chr03_7531(-0.699300699301|-0.699300699301)	MSTRG.8700,Pig.09456	REV1-202	DNA repair protein REV1 isoform X1 [Sus scrofa]	MSTRG.43551			1	0.267701
Chr03_77822466_77840328	Pig.14753.1	MSTRG.8700,Pig.09456	Pig.14753	circRNA	mRNA	1	0.071345	0.65035	0.0220342	0.178309	Chr02_7181(-0.879160717765|-0.732050159414)	MSTRG.8700,Pig.09456	REV1-202	DNA repair protein REV1 isoform X1 [Sus scrofa]	Pig.14753	VWCE-201	von Willebrand factor C and EGF domain-containing protein isoform X1 [Sus scrofa]	0.908696	0.629526
Chr03_77822466_77840328	Pig.10307.1	MSTRG.8700,Pig.09456	Pig.10307	circRNA	mRNA	1	0.0368421	0.769231	0.00344645	0.103583	Chr02_7181(-0.879160717765|-0.66199751258)	MSTRG.8700,Pig.09456	REV1-202	DNA repair protein REV1 isoform X1 [Sus scrofa]	Pig.10307	CCNF-201	Cyclin-F [Fukomys damarensis]	0.859091	0.245014
Chr03_77822466_77840328	Pig.17713.1	MSTRG.8700,Pig.09456	Pig.17713	circRNA	mRNA	1	0.161739	0.673688	0.0163088	0.162623	Chr02_7181(-0.879160717765|-0.701231311418)	MSTRG.8700,Pig.09456	REV1-202	DNA repair protein REV1 isoform X1 [Sus scrofa]	Pig.17713	FBN3-203	fibrillin-3 [Sus scrofa]	0.887414	0.50534
Chr03_77822466_77840328	Pig.09158.1	MSTRG.8700,Pig.09456	Pig.09158	circRNA	mRNA	1	0.103602	0.629371	0.0283197	0.195771	mir-331:ssc-miR-331-3p(-0.587412587413|-0.615384615385)	MSTRG.8700,Pig.09456	REV1-202	DNA repair protein REV1 isoform X1 [Sus scrofa]	Pig.09158	SLC12A9-201	solute carrier family 12 member 9 isoform X1 [Sus scrofa]	0.976744	0.209422
Chr03_77822466_77840328	Pig.11328.1	MSTRG.8700,Pig.09456	Pig.11328	circRNA	mRNA	1	0.0368421	0.825175	0.000951363	0.0835562	Chr02_7181(-0.879160717765|-0.679510674288)	MSTRG.8700,Pig.09456	REV1-202	DNA repair protein REV1 isoform X1 [Sus scrofa]	Pig.11328	HIST2H2BE-201	PREDICTED: histone H2B type 1-like [Propithecus coquereli]	0.87191	0.173662
Chr03_77822466_77840328	Pig.12641.1	MSTRG.8700,Pig.09456	Pig.12641	circRNA	mRNA	1	0.103602	0.65035	0.0220342	0.178309	Chr02_7181(-0.879160717765|-0.707531733022)	MSTRG.8700,Pig.09456	REV1-202	DNA repair protein REV1 isoform X1 [Sus scrofa]	Pig.12641	MUTYH	adenine DNA glycosylase isoform X1 [Sus scrofa]	0.891832	0.566265
Chr03_77822466_77840328	Pig.06349.1	MSTRG.8700,Pig.09456	Pig.06349	circRNA	mRNA	1	0.133704	0.59895	0.0395981	0.218821	mir-331:ssc-miR-331-3p(-0.587412587413|-0.763573850489)	MSTRG.8700,Pig.09456	REV1-202	DNA repair protein REV1 isoform X1 [Sus scrofa]	Pig.06349	PIK3R2	phosphatidylinositol 3-kinase regulatory subunit beta [Sus scrofa]	0.869605	0.311111
Chr04_80611471_80622183	MSTRG.30891.2	Pig.10548	MSTRG.30891	circRNA	mRNA	1	0.0421053	0.58042	0.047856	0.23044	mir-361:ssc-miR-361-3p(-0.839160839161|-0.811188811189)	Pig.10548	CCT3-202	T-complex protein 1 subunit gamma [Sus scrofa]	MSTRG.30891			0.983051	0.895769
Chr14_24723115_24760271	MSTRG.19396.1	Pig.12220	MSTRG.19396	circRNA	mRNA	1	0.0414369	0.615835	0.0330052	0.205087	Chr03_9544(-0.772592464899|-0.853146853147)	Pig.12220	B3GALNT2-201	UDP-GalNAc:beta-1,3-N-acetylgalactosaminyltransferase 2 [Sus scrofa]	MSTRG.19396			0.950451	0.746568
Chr14_24723115_24760271	Pig.22620.1	Pig.12220	Pig.22620	circRNA	mRNA	1	0.071345	0.627032	0.0290927	0.198294	Chr12_28094(-0.680474879308|-0.72504489473)	Pig.12220	B3GALNT2-201	UDP-GalNAc:beta-1,3-N-acetylgalactosaminyltransferase 2 [Sus scrofa]	Pig.22620	RGS12-201	LOW QUALITY PROTEIN: regulator of G-protein signaling 12 [Sus scrofa]	0.968289	0.362187
Chr14_24723115_24760271	Pig.21446.1	Pig.12220	Pig.21446	circRNA	mRNA	1	0.0105263	0.582244	0.0469936	0.23044	Chr12_28094(-0.680474879308|-0.86865282074)	Pig.12220	B3GALNT2-201	UDP-GalNAc:beta-1,3-N-acetylgalactosaminyltransferase 2 [Sus scrofa]	Pig.21446	CYBA-201	cytochrome b-245 light chain isoform X1 [Sus scrofa]	0.878527	0.606629
Chr14_24723115_24760271	Pig.01857.1	Pig.12220	Pig.01857	circRNA	mRNA	1	0.0105263	0.653158	0.0212776	0.1777	Chr03_9544(-0.772592464899|-0.832167832168)	Pig.12220	B3GALNT2-201	UDP-GalNAc:beta-1,3-N-acetylgalactosaminyltransferase 2 [Sus scrofa]	Pig.01857	SRPX-204	sushi repeat-containing protein SRPX isoform X1 [Sus scrofa]	0.962876	0.624097
Chr14_24723115_24760271	MSTRG.12911.1	Pig.12220	MSTRG.12911	circRNA	mRNA	1	0.0105263	0.585976	0.0452632	0.227083	Chr12_28094(-0.680474879308|-0.633976453846)	Pig.12220	B3GALNT2-201	UDP-GalNAc:beta-1,3-N-acetylgalactosaminyltransferase 2 [Sus scrofa]	MSTRG.12911			0.964625	0.313215
Chr14_24723115_24760271	Pig.15342.1	Pig.12220	Pig.15342	circRNA	mRNA	1	0.0105263	0.650564	0.0219758	0.178309	Chr03_9544(-0.772592464899|-0.816113335614)	Pig.12220	B3GALNT2-201	UDP-GalNAc:beta-1,3-N-acetylgalactosaminyltransferase 2 [Sus scrofa]	Pig.15342	TNKS1BP1	182 kDa tankyrase-1-binding protein-like [Sus scrofa]	0.972606	0.595942
Chr14_24723115_24760271	Pig.11814.1	Pig.12220	Pig.11814	circRNA	mRNA	1	0.0209412	0.679284	0.0151171	0.159036	Chr03_9544(-0.772592464899|-0.867132867133)	Pig.12220	B3GALNT2-201	UDP-GalNAc:beta-1,3-N-acetylgalactosaminyltransferase 2 [Sus scrofa]	Pig.11814	NOS2-203	nitric oxide synthase, inducible isoform X1 [Sus scrofa]	0.942344	0.649736
Chr14_24723115_24760271	Pig.12641.1	Pig.12220	Pig.12641	circRNA	mRNA	1	0.0312448	0.739001	0.00603345	0.119527	Chr03_9544(-0.772592464899|-0.839160839161)	Pig.12220	B3GALNT2-201	UDP-GalNAc:beta-1,3-N-acetylgalactosaminyltransferase 2 [Sus scrofa]	Pig.12641	MUTYH	adenine DNA glycosylase isoform X1 [Sus scrofa]	0.958698	0.476422
Chr08_27956764_27994675	Pig.20594.1	Pig.12463	Pig.20594	circRNA	mRNA	2	0.00876747	0.669028	0.0173529	0.164599	Scaffold1533_43934(-0.765957446809|-0.68318691078);mir-423:ssc-miR-423-5p(-0.640860961836|-0.899836760121)	Pig.12463	APBB2-201	amyloid beta A4 precursor protein-binding family B member 2 isoform X9 [Sus scrofa]	Pig.20594	LRRC14-202	leucine-rich repeat-containing protein 14 [Sus scrofa]	0.984242	0.375915
Chr08_27956764_27994675	Pig.08781.1	Pig.12463	Pig.08781	circRNA	mRNA	1	0.0421053	0.612691	0.0341681	0.207077	Chr03_7531(-0.676073102596|-0.769230769231)	Pig.12463	APBB2-201	amyloid beta A4 precursor protein-binding family B member 2 isoform X9 [Sus scrofa]	Pig.08781	SEMA4B-201	semaphorin-4B [Sus scrofa]	0.935545	0.415937
Chr08_27956764_27994675	Pig.11856.1	Pig.12463	Pig.11856	circRNA	mRNA	1	0.0810916	0.617293	0.0324755	0.205087	mir-423:ssc-miR-423-5p(-0.640860961836|-0.644484350871)	Pig.12463	APBB2-201	amyloid beta A4 precursor protein-binding family B member 2 isoform X9 [Sus scrofa]	Pig.11856	TP53I13-201	LOW QUALITY PROTEIN: tumor protein p53-inducible protein 13 [Sus scrofa]	0.997181	0.269285
Chr08_27956764_27994675	Pig.11237.1	Pig.12463	Pig.11237	circRNA	mRNA	1	0.0421053	0.633819	0.0268907	0.192217	ChrX_41806(-0.589073501268|-0.637479086188)	Pig.12463	APBB2-201	amyloid beta A4 precursor protein-binding family B member 2 isoform X9 [Sus scrofa]	Pig.11237	MMP28-201	matrix metalloproteinase-28 isoform X1 [Sus scrofa]	0.960535	0.21895
Chr08_27956764_27994675	Pig.12620.1	Pig.12463	Pig.12620	circRNA	mRNA	1	0.0810916	0.666676	0.0178979	0.168245	mir-423:ssc-miR-423-5p(-0.640860961836|-0.917689673523)	Pig.12463	APBB2-201	amyloid beta A4 precursor protein-binding family B member 2 isoform X9 [Sus scrofa]	Pig.12620	FAAH-201	fatty-acid amide hydrolase 1 [Sus scrofa]	0.822381	0.409078
Chr08_27956764_27994675	Pig.11508.1	Pig.12463	Pig.11508	circRNA	mRNA	1	0.0421053	0.612691	0.0341681	0.207077	Scaffold1533_43934(-0.765957446809|-0.711285243356)	Pig.12463	APBB2-201	amyloid beta A4 precursor protein-binding family B member 2 isoform X9 [Sus scrofa]	Pig.11508	WBP1-201	WW domain-binding protein 1 isoform X1 [Sus scrofa]	0.96299	0.462484
Chr08_27956764_27994675	MSTRG.8524.2	Pig.12463	MSTRG.8524	circRNA	mRNA	1	0.117108	0.582019	0.0470993	0.23044	Scaffold1533_43934(-0.765957446809|-0.825408379023)	Pig.12463	APBB2-201	amyloid beta A4 precursor protein-binding family B member 2 isoform X9 [Sus scrofa]	MSTRG.8524			0.962642	0.72036
Chr08_27956764_27994675	Pig.12641.1	Pig.12463	Pig.12641	circRNA	mRNA	1	0.117108	0.577479	0.0492696	0.233079	Chr03_9544(-0.612691249227|-0.839160839161)	Pig.12463	APBB2-201	amyloid beta A4 precursor protein-binding family B member 2 isoform X9 [Sus scrofa]	Pig.12641	MUTYH	adenine DNA glycosylase isoform X1 [Sus scrofa]	0.844013	0.43014
Chr10_22670141_22673756	Pig.20594.1	Pig.11154	Pig.20594	circRNA	mRNA	1	0.0611635	0.639728	0.0250739	0.188274	mir-423:ssc-miR-423-5p(-0.734265734266|-0.899836760121)	Pig.11154	TGFB2-201	transforming growth factor beta-2 isoform X1 [Sus scrofa]	Pig.20594	LRRC14-202	leucine-rich repeat-containing protein 14 [Sus scrofa]	0.898678	0.710612
Chr10_22670141_22673756	Pig.11856.1	Pig.11154	Pig.11856	circRNA	mRNA	1	0.0312448	0.619966	0.0315202	0.201756	mir-423:ssc-miR-423-5p(-0.734265734266|-0.644484350871)	Pig.11154	TGFB2-201	transforming growth factor beta-2 isoform X1 [Sus scrofa]	Pig.11856	TP53I13-201	LOW QUALITY PROTEIN: tumor protein p53-inducible protein 13 [Sus scrofa]	0.934882	0.337262
Chr10_22670141_22673756	Pig.12620.1	Pig.11154	Pig.12620	circRNA	mRNA	1	0.0312448	0.707532	0.0100544	0.139666	mir-423:ssc-miR-423-5p(-0.734265734266|-0.917689673523)	Pig.11154	TGFB2-201	transforming growth factor beta-2 isoform X1 [Sus scrofa]	Pig.12620	FAAH-201	fatty-acid amide hydrolase 1 [Sus scrofa]	0.888966	0.582569
Chr08_82174982_82248693	Pig.20592.1	Pig.01089	Pig.20592	circRNA	mRNA	1	0.100251	0.776224	0.00299286	0.100207	mir-361:ssc-miR-361-3p(-0.65034965035|-0.643356643357)	Pig.01089	ARHGAP10-201	rho GTPase-activating protein 10 isoform X1 [Sus scrofa]	Pig.20592	MFSD3-201	major facilitator superfamily domain-containing protein 3 isoform X2 [Sus scrofa]	0.994595	0.160943
Chr08_82174982_82248693	MSTRG.21578.1	Pig.01089	MSTRG.21578	circRNA	mRNA	1	0.216153	0.587413	0.0446093	0.225097	mir-361:ssc-miR-361-3p(-0.65034965035|-0.776223776224)	Pig.01089	ARHGAP10-201	rho GTPase-activating protein 10 isoform X1 [Sus scrofa]	MSTRG.21578			0.911765	0.414949
Chr08_82174982_82248693	Pig.16786.1	Pig.01089	Pig.16786	circRNA	mRNA	2	0.0137818	0.581437	0.0473736	0.23044	Chr13_29068(-0.713286713287|-0.865150188398);Chr13_29067(-0.713286713287|-0.865150188398)	Pig.01089	ARHGAP10-201	rho GTPase-activating protein 10 isoform X1 [Sus scrofa]	Pig.16786	TTYH1-201	protein tweety homolog 1 isoform X1 [Sus scrofa]	0.990743	0.682898
Chr08_82174982_82248693	Pig.08043.1	Pig.01089	Pig.08043	circRNA	mRNA	1	0.0526316	0.608392	0.035806	0.209995	ssc-miR-7137-3p(-0.594405594406|-0.783216783217)	Pig.01089	ARHGAP10-201	rho GTPase-activating protein 10 isoform X1 [Sus scrofa]	Pig.08043	RGS9-201	regulator of G-protein signaling 9 isoform X1 [Sus scrofa]	0.862944	0.322699
Chr08_82174982_82248693	Pig.14753.1	Pig.01089	Pig.14753	circRNA	mRNA	1	0.100251	0.594406	0.0415215	0.221137	Chr08_21275(-0.591944865746|-0.693521203655)	Pig.01089	ARHGAP10-201	rho GTPase-activating protein 10 isoform X1 [Sus scrofa]	Pig.14753	VWCE-201	von Willebrand factor C and EGF domain-containing protein isoform X1 [Sus scrofa]	0.920981	0.277731
Chr08_82174982_82248693	MSTRG.8524.2	Pig.01089	MSTRG.8524	circRNA	mRNA	1	0.143177	0.676008	0.0158067	0.160844	mir-361:ssc-miR-361-3p(-0.65034965035|-0.619965924479)	Pig.01089	ARHGAP10-201	rho GTPase-activating protein 10 isoform X1 [Sus scrofa]	MSTRG.8524			0.976082	0.218292
Chr02_159713586_159713945	Pig.14610.1		Pig.14610	circRNA	mRNA	1	0.0105263	0.740351	0.00589375	0.119527	Chr02_4243(-0.736842105263|-0.771929824561)				Pig.14610	AK8-201	adenylate kinase 8 isoform X3 [Sus scrofa]	0.976744	0.341168
Chr02_159713586_159713945	Pig.04999.1		Pig.04999	circRNA	mRNA	1	0.00526316	0.73205	0.00679293	0.123576	Chr02_4243(-0.736842105263|-0.851139659031)				Pig.04999	PPOX-201	protoporphyrinogen oxidase isoform X1 [Sus scrofa]	0.928023	0.436483
Chr02_159713586_159713945	MSTRG.30569.1		MSTRG.30569	circRNA	mRNA	1	0.0157895	0.85875	0.00034763	0.0703934	Chr02_4243(-0.736842105263|-0.687727573601)				MSTRG.30569			0.965523	0.14155
Chr02_159713586_159713945	Pig.03572.1		Pig.03572	circRNA	mRNA	1	0.0157895	0.85114	0.000445901	0.0714832	Chr02_4243(-0.736842105263|-0.760071218147)				Pig.03572	ADAMTS7-201	A disintegrin and metalloproteinase with thrombospondin motifs 7 isoform X1 [Sus scrofa]	0.984482	0.188575
Chr02_159713586_159713945	Pig.10552.1		Pig.10552	circRNA	mRNA	1	0.0105263	0.742558	0.00567053	0.119527	Chr02_4243(-0.736842105263|-0.70402910068)				Pig.10552	IQGAP3-201	ras GTPase-activating-like protein IQGAP3 isoform X1 [Sus scrofa]	0.977227	0.276427
Chr02_159713586_159713945	Pig.22207.1		Pig.22207	circRNA	mRNA	1	0.0105263	0.694201	0.0122539	0.148606	Chr02_4243(-0.736842105263|-0.762742829963)				Pig.22207	MYO7A-201	unconventional myosin-VIIa [Sus scrofa]	0.982728	0.391876
Chr02_159713586_159713945	Pig.18196.1		Pig.18196	circRNA	mRNA	1	0.0315789	0.786557	0.00240758	0.0962432	Chr02_4243(-0.736842105263|-0.686902337826)				Pig.18196	CFAP46-201	cilia- and flagella-associated protein 46 isoform X3 [Sus scrofa]	0.964924	0.215824
Chr02_159713586_159713945	Pig.15469.1		Pig.15469	circRNA	mRNA	1	0.0157895	0.669003	0.0173586	0.164599	Chr02_4243(-0.736842105263|-0.633976453846)				Pig.15469	ADAMTS14-201	LOW QUALITY PROTEIN: A disintegrin and metalloproteinase with thrombospondin motifs 14 [Sus scrofa]	0.92496	0.282912
Chr02_159713586_159713945	Pig.09792.1		Pig.09792	circRNA	mRNA	1	0.0105263	0.921053	2.1131e-05	0.0331603	Chr02_4243(-0.736842105263|-0.687719298246)				Pig.09792	MAGED1-201	melanoma-associated antigen D4-like [Sus scrofa]	0.965517	0.0769086
Chr02_159713586_159713945	Pig.14276.1		Pig.14276	circRNA	mRNA	1	0.00526316	0.7986	0.00184042	0.0915734	Chr02_4243(-0.736842105263|-0.756568585805)				Pig.14276	DDX28-201	probable ATP-dependent RNA helicase DDX28 [Sus scrofa]	0.986791	0.25317
Chr02_159713586_159713945	Pig.21628.1		Pig.21628	circRNA	mRNA	1	0.00526316	0.796491	0.00193146	0.0915734	Chr02_4243(-0.736842105263|-0.645614035088)				Pig.21628	ADGRL1-201	adhesion G protein-coupled receptor L1 isoform X1 [Sus scrofa]	0.93401	0.175178
Chr02_159713586_159713945	MSTRG.20872.1		MSTRG.20872	circRNA	mRNA	1	0.0157895	0.791595	0.0021561	0.0938036	Chr02_4243(-0.736842105263|-0.658494880238)				MSTRG.20872			0.943851	0.189413
Chr02_159713586_159713945	Pig.09306.1		Pig.09306	circRNA	mRNA	1	0.0157895	0.747368	0.00520614	0.119451	Chr02_4243(-0.736842105263|-0.750877192982)				Pig.09306	PTK7-201	inactive tyrosine-protein kinase 7 [Sus scrofa]	0.990566	0.312677
Chr02_159713586_159713945	Pig.20477.1		Pig.20477	circRNA	mRNA	1	0.0105263	0.767076	0.00359618	0.103583	Chr02_4243(-0.736842105263|-0.788092276881)				Pig.20477	VRK3-202	inactive serine/threonine-protein kinase VRK3 [Sus scrofa]	0.966392	0.319224
Chr02_159713586_159713945	MSTRG.27259.1		MSTRG.27259	circRNA	mRNA	1	0.00526316	0.661998	0.0190195	0.170274	Chr02_4243(-0.736842105263|-0.595447498088)				MSTRG.27259			0.893871	0.250973
Chr02_159713586_159713945	Pig.18835.1		Pig.18835	circRNA	mRNA	1	0.0368421	0.72807	0.00725886	0.127324	Chr02_4243(-0.736842105263|-0.814035087719)				Pig.18835	PIK3R6-203	phosphoinositide 3-kinase regulatory subunit 6 isoform X3 [Sus scrofa]	0.950226	0.401447
Chr02_159713586_159713945	Pig.17786.1		Pig.17786	circRNA	mRNA	1	0.00526316	0.872155	0.000216175	0.0630114	Chr02_4243(-0.736842105263|-0.72504489473)				Pig.17786	PRKD2-201	uncharacterized protein LOC110261743 [Sus scrofa]	0.99193	0.146411
Chr03_133654793_133664301	MSTRG.30891.2	MSTRG.10349,Pig.09034	MSTRG.30891	circRNA	mRNA	1	0.234282	0.626434	0.0292927	0.198294	Chr07_17502(-0.815075660799|-0.811188811189)	MSTRG.10349,Pig.09034	ASAP2-202	arf-GAP with SH3 domain, ANK repeat and PH domain-containing protein 2 isoform X4 [Sus scrofa]	MSTRG.30891			0.99761	0.728992
Chr03_133654793_133664301	Pig.22620.1	MSTRG.10349,Pig.09034	Pig.22620	circRNA	mRNA	1	0.211946	0.587282	0.0446686	0.225129	Chr12_28094(-0.791545717205|-0.72504489473)	MSTRG.10349,Pig.09034	ASAP2-202	arf-GAP with SH3 domain, ANK repeat and PH domain-containing protein 2 isoform X4 [Sus scrofa]	Pig.22620	RGS12-201	LOW QUALITY PROTEIN: regulator of G-protein signaling 12 [Sus scrofa]	0.956151	0.555501
Chr03_133654793_133664301	Pig.18699.1	MSTRG.10349,Pig.09034	Pig.18699	circRNA	mRNA	2	0.0107826	0.718975	0.00841326	0.130084	Chr12_28849(-0.70473790759|-0.762237762238);Chr17_39950(-0.857787049138|-0.622377622378)	MSTRG.10349,Pig.09034	ASAP2-202	arf-GAP with SH3 domain, ANK repeat and PH domain-containing protein 2 isoform X4 [Sus scrofa]	Pig.18699	NCAPD2-202	condensin complex subunit 1 isoform X1 [Sus scrofa]	0.986585	0.290991
Chr03_133654793_133664301	Pig.10552.1	MSTRG.10349,Pig.09034	Pig.10552	circRNA	mRNA	1	0.071345	0.772364	0.00323718	0.103583	Chr12_28849(-0.70473790759|-0.671328671329)	MSTRG.10349,Pig.09034	ASAP2-202	arf-GAP with SH3 domain, ANK repeat and PH domain-containing protein 2 isoform X4 [Sus scrofa]	Pig.10552	IQGAP3-201	ras GTPase-activating-like protein IQGAP3 isoform X1 [Sus scrofa]	0.975721	0.203256
Chr03_133654793_133664301	Pig.18656.1	MSTRG.10349,Pig.09034	Pig.18656	circRNA	mRNA	1	0.103602	0.605078	0.0371059	0.214334	Chr07_17502(-0.815075660799|-0.685314685315)	MSTRG.10349,Pig.09034	ASAP2-202	arf-GAP with SH3 domain, ANK repeat and PH domain-containing protein 2 isoform X4 [Sus scrofa]	Pig.18656	ARRB2-201	beta-arrestin-2 isoform X3 [Sus scrofa]	0.913515	0.494878
Chr03_133654793_133664301	Pig.21446.1	MSTRG.10349,Pig.09034	Pig.21446	circRNA	mRNA	1	0.0368421	0.672704	0.0165253	0.162623	Chr12_28094(-0.791545717205|-0.86865282074)	MSTRG.10349,Pig.09034	ASAP2-202	arf-GAP with SH3 domain, ANK repeat and PH domain-containing protein 2 isoform X4 [Sus scrofa]	Pig.21446	CYBA-201	cytochrome b-245 light chain isoform X1 [Sus scrofa]	0.953555	0.721833
Chr03_133654793_133664301	MSTRG.7340.1	MSTRG.10349,Pig.09034	MSTRG.7340	circRNA	mRNA	1	0.0368421	0.612197	0.0343538	0.207381	Chr17_39950(-0.857787049138|-0.678321678322)	MSTRG.10349,Pig.09034	ASAP2-202	arf-GAP with SH3 domain, ANK repeat and PH domain-containing protein 2 isoform X4 [Sus scrofa]	MSTRG.7340			0.883169	0.53186
Chr03_133654793_133664301	Pig.14826.1	MSTRG.10349,Pig.09034	Pig.14826	circRNA	mRNA	1	0.0368421	0.633552	0.0269747	0.19269	Chr05_13105(-0.656938391755|-0.73236492165)	MSTRG.10349,Pig.09034	ASAP2-202	arf-GAP with SH3 domain, ANK repeat and PH domain-containing protein 2 isoform X4 [Sus scrofa]	Pig.14826	DTX4-201	E3 ubiquitin-protein ligase DTX4 isoform X1 [Sus scrofa]	0.945709	0.336625
Chr03_133654793_133664301	MSTRG.17961.3	MSTRG.10349,Pig.09034	MSTRG.17961	circRNA	mRNA	1	0.0368421	0.74389	0.00553894	0.119527	Chr07_17502(-0.815075660799|-0.874125874126)	MSTRG.10349,Pig.09034	ASAP2-202	arf-GAP with SH3 domain, ANK repeat and PH domain-containing protein 2 isoform X4 [Sus scrofa]	MSTRG.17961			0.965043	0.632262
Chr03_133654793_133664301	Pig.07596.1	MSTRG.10349,Pig.09034	Pig.07596	circRNA	mRNA	1	0.0368421	0.753648	0.00464377	0.11488	Chr17_39950(-0.857787049138|-0.726320260526)	MSTRG.10349,Pig.09034	ASAP2-202	arf-GAP with SH3 domain, ANK repeat and PH domain-containing protein 2 isoform X4 [Sus scrofa]	Pig.07596	TROAP-201	tastin isoform X1 [Sus scrofa]	0.917009	0.383939
Chr03_133654793_133664301	Pig.20023.1	MSTRG.10349,Pig.09034	Pig.20023	circRNA	mRNA	1	0.0368421	0.605078	0.0371059	0.214334	Chr12_28849(-0.70473790759|-0.685314685315)	MSTRG.10349,Pig.09034	ASAP2-202	arf-GAP with SH3 domain, ANK repeat and PH domain-containing protein 2 isoform X4 [Sus scrofa]	Pig.20023	MYADML2-201	myeloid-associated differentiation marker-like protein 2 [Sus scrofa]	0.986027	0.368735
Chr03_133654793_133664301	MSTRG.34668.1	MSTRG.10349,Pig.09034	MSTRG.34668	circRNA	mRNA	1	0.0368421	0.612939	0.0340756	0.207077	Chr12_28849(-0.70473790759|-0.721848885584)	MSTRG.10349,Pig.09034	ASAP2-202	arf-GAP with SH3 domain, ANK repeat and PH domain-containing protein 2 isoform X4 [Sus scrofa]	MSTRG.34668			0.988006	0.400664
Chr03_133654793_133664301	Pig.10835.1	MSTRG.10349,Pig.09034	Pig.10835	circRNA	mRNA	1	0.161739	0.582963	0.0466566	0.23038	Chr12_28849(-0.70473790759|-0.605955395113)	MSTRG.10349,Pig.09034	ASAP2-202	arf-GAP with SH3 domain, ANK repeat and PH domain-containing protein 2 isoform X4 [Sus scrofa]	Pig.10835	DISP1-201	protein dispatched homolog 1 isoform X3 [Sus scrofa]	0.924633	0.30669
Chr03_133654793_133664301	Pig.12679.1	MSTRG.10349,Pig.09034	Pig.12679	circRNA	mRNA	1	0.071345	0.622874	0.030504	0.199692	Chr12_28849(-0.70473790759|-0.65034965035)	MSTRG.10349,Pig.09034	ASAP2-202	arf-GAP with SH3 domain, ANK repeat and PH domain-containing protein 2 isoform X4 [Sus scrofa]	Pig.12679	TIE1-201	tyrosine-protein kinase receptor Tie-1 isoform X6 [Sus scrofa]	0.959864	0.317554
Chr03_133654793_133664301	Pig.15860.1	MSTRG.10349,Pig.09034	Pig.15860	circRNA	mRNA	1	0.187792	0.606139	0.0366863	0.213363	Chr12_28849(-0.70473790759|-0.588442233404)	MSTRG.10349,Pig.09034	ASAP2-202	arf-GAP with SH3 domain, ANK repeat and PH domain-containing protein 2 isoform X4 [Sus scrofa]	Pig.15860	BSN-201	protein bassoon isoform X2 [Sus scrofa]	0.91007	0.272404
Chr03_133654793_133664301	Pig.09950.1	MSTRG.10349,Pig.09034	Pig.09950	circRNA	mRNA	1	0.0368421	0.713104	0.00922795	0.133618	Chr12_28849(-0.70473790759|-0.70402910068)	MSTRG.10349,Pig.09034	ASAP2-202	arf-GAP with SH3 domain, ANK repeat and PH domain-containing protein 2 isoform X4 [Sus scrofa]	Pig.09950	FANCC	Fanconi anemia group C protein isoform X1 [Sus scrofa]	0.999497	0.282518
Chr03_133654793_133664301	MSTRG.44690.1	MSTRG.10349,Pig.09034	MSTRG.44690	circRNA	mRNA	1	0.133704	0.598554	0.039763	0.218829	Chr17_39950(-0.857787049138|-0.646619037648)	MSTRG.10349,Pig.09034	ASAP2-202	arf-GAP with SH3 domain, ANK repeat and PH domain-containing protein 2 isoform X4 [Sus scrofa]	MSTRG.44690			0.859634	0.486608
Chr03_133654793_133664301	Pig.18822.1	MSTRG.10349,Pig.09034	Pig.18822	circRNA	mRNA	1	0.071345	0.704738	0.0104888	0.139892	Chr12_28849(-0.70473790759|-0.685314685315)	MSTRG.10349,Pig.09034	ASAP2-202	arf-GAP with SH3 domain, ANK repeat and PH domain-containing protein 2 isoform X4 [Sus scrofa]	Pig.18822	CTC1	LOW QUALITY PROTEIN: CST complex subunit CTC1 [Sus scrofa]	0.986027	0.275505
Chr03_133654793_133664301	Pig.15616.1	MSTRG.10349,Pig.09034	Pig.15616	circRNA	mRNA	1	0.0368421	0.669145	0.017326	0.164599	Chr12_28849(-0.70473790759|-0.776223776224)	MSTRG.10349,Pig.09034	ASAP2-202	arf-GAP with SH3 domain, ANK repeat and PH domain-containing protein 2 isoform X4 [Sus scrofa]	Pig.15616	SNX17-201	PREDICTED: sorting nexin-17 isoform X1 [Trichechus manatus latirostris]	0.95173	0.396143
Chr03_133654793_133664301	Pig.12644.1	MSTRG.10349,Pig.09034	Pig.12644	circRNA	mRNA	1	0.0368421	0.637112	0.0258669	0.189707	Chr12_28849(-0.70473790759|-0.804195804196)	MSTRG.10349,Pig.09034	ASAP2-202	arf-GAP with SH3 domain, ANK repeat and PH domain-containing protein 2 isoform X4 [Sus scrofa]	Pig.12644	UROD-201	uroporphyrinogen decarboxylase [Sus scrofa]	0.934087	0.470246
Chr03_133654793_133664301	Pig.17875.1	MSTRG.10349,Pig.09034	Pig.17875	circRNA	mRNA	1	0.0368421	0.612197	0.0343538	0.207381	Chr17_39950(-0.857787049138|-0.692307692308)	MSTRG.10349,Pig.09034	ASAP2-202	arf-GAP with SH3 domain, ANK repeat and PH domain-containing protein 2 isoform X4 [Sus scrofa]	Pig.17875	ENDOG-201	endonuclease G, mitochondrial isoform X2 [Heterocephalus glaber]	0.893246	0.562739
Chr03_133654793_133664301	Pig.11420.1	MSTRG.10349,Pig.09034	Pig.11420	circRNA	mRNA	1	0.0368421	0.622183	0.0307433	0.199887	Chr07_17502(-0.815075660799|-0.669002777263)	MSTRG.10349,Pig.09034	ASAP2-202	arf-GAP with SH3 domain, ANK repeat and PH domain-containing protein 2 isoform X4 [Sus scrofa]	Pig.11420	CCHCR1-201	coiled-coil alpha-helical rod protein 1 isoform X1 [Sus scrofa]	0.901573	0.44361
Chr03_133654793_133664301	MSTRG.16380.1	MSTRG.10349,Pig.09034	MSTRG.16380	circRNA	mRNA	1	0.071345	0.690501	0.0129231	0.149599	Chr07_17502(-0.815075660799|-0.762237762238)	MSTRG.10349,Pig.09034	ASAP2-202	arf-GAP with SH3 domain, ANK repeat and PH domain-containing protein 2 isoform X4 [Sus scrofa]	MSTRG.16380			0.966501	0.505923
Chr03_133654793_133664301	Pig.21160.1	MSTRG.10349,Pig.09034	Pig.21160	circRNA	mRNA	1	0.0368421	0.647142	0.0229221	0.181799	ssc-miR-1842(-0.679822931059|-0.630473821505)	MSTRG.10349,Pig.09034	ASAP2-202	arf-GAP with SH3 domain, ANK repeat and PH domain-containing protein 2 isoform X4 [Sus scrofa]	Pig.21160	SYNPO	LOW QUALITY PROTEIN: synaptopodin [Sus scrofa]	0.962337	0.263251
Chr03_133654793_133664301	Pig.11556.1	MSTRG.10349,Pig.09034	Pig.11556	circRNA	mRNA	1	0.187792	0.688146	0.0133629	0.152485	Chr17_39950(-0.857787049138|-0.619965924479)	MSTRG.10349,Pig.09034	ASAP2-202	arf-GAP with SH3 domain, ANK repeat and PH domain-containing protein 2 isoform X4 [Sus scrofa]	Pig.11556	MKI67	proliferation marker protein Ki-67 isoform X9 [Sus scrofa]	0.839066	0.30048
Chr03_133654793_133664301	Pig.15852.1	MSTRG.10349,Pig.09034	Pig.15852	circRNA	mRNA	1	0.071345	0.666752	0.01788	0.168245	Chr12_28849(-0.70473790759|-0.812610703272)	MSTRG.10349,Pig.09034	ASAP2-202	arf-GAP with SH3 domain, ANK repeat and PH domain-containing protein 2 isoform X4 [Sus scrofa]	Pig.15852	UBA7-201	ubiquitin-like modifier-activating enzyme 7 [Sus scrofa]	0.928907	0.439234
Chr03_133654793_133664301	Pig.02040.1	MSTRG.10349,Pig.09034	Pig.02040	circRNA	mRNA	1	0.0368421	0.782223	0.00264129	0.0972557	Chr17_39950(-0.857787049138|-0.859654414633)	MSTRG.10349,Pig.09034	ASAP2-202	arf-GAP with SH3 domain, ANK repeat and PH domain-containing protein 2 isoform X4 [Sus scrofa]	Pig.02040	ALOX5-201	LOW QUALITY PROTEIN: arachidonate 5-lipoxygenase [Sus scrofa]	0.998913	0.611532
Chr03_133654793_133664301	Pig.17713.1	MSTRG.10349,Pig.09034	Pig.17713	circRNA	mRNA	1	0.161739	0.650066	0.0221116	0.178408	Chr12_28849(-0.70473790759|-0.659653183473)	MSTRG.10349,Pig.09034	ASAP2-202	arf-GAP with SH3 domain, ANK repeat and PH domain-containing protein 2 isoform X4 [Sus scrofa]	Pig.17713	FBN3-203	fibrillin-3 [Sus scrofa]	0.966956	0.30277
Chr03_133654793_133664301	Pig.10363.1	MSTRG.10349,Pig.09034	Pig.10363	circRNA	mRNA	1	0.103602	0.676264	0.0157521	0.160844	Chr17_39950(-0.857787049138|-0.601398601399)	MSTRG.10349,Pig.09034	ASAP2-202	arf-GAP with SH3 domain, ANK repeat and PH domain-containing protein 2 isoform X4 [Sus scrofa]	Pig.10363	CORO7-PAM16	coronin-7 isoform X1 [Sus scrofa]	0.824293	0.285697
Chr03_133654793_133664301	Pig.03444.1	MSTRG.10349,Pig.09034	Pig.03444	circRNA	mRNA	1	0.071345	0.577614	0.0492039	0.233079	Chr12_28849(-0.70473790759|-0.633976453846)	MSTRG.10349,Pig.09034	ASAP2-202	arf-GAP with SH3 domain, ANK repeat and PH domain-containing protein 2 isoform X4 [Sus scrofa]	Pig.03444	ATP7A-203	LOW QUALITY PROTEIN: copper-transporting ATPase 2 [Sus scrofa]	0.947142	0.33917
Chr03_133654793_133664301	Pig.11984.1	MSTRG.10349,Pig.09034	Pig.11984	circRNA	mRNA	1	0.133704	0.620401	0.0313668	0.201756	Chr17_39950(-0.857787049138|-0.742558056439)	MSTRG.10349,Pig.09034	ASAP2-202	arf-GAP with SH3 domain, ANK repeat and PH domain-containing protein 2 isoform X4 [Sus scrofa]	Pig.11984	HTR4-204	5-hydroxytryptamine receptor 4 [Sus scrofa]	0.927997	0.668491
Chr03_133654793_133664301	Pig.01321.1	MSTRG.10349,Pig.09034	Pig.01321	circRNA	mRNA	2	0.00341545	0.675666	0.0158799	0.161216	Chr07_17502(-0.815075660799|-0.795097541564);Chr05_13105(-0.656938391755|-0.679169787353)	MSTRG.10349,Pig.09034	ASAP2-202	arf-GAP with SH3 domain, ANK repeat and PH domain-containing protein 2 isoform X4 [Sus scrofa]	Pig.01321	KCP-201	kielin/chordin-like protein isoform X1 [Sus scrofa]	0.999785	0.429033
Chr03_133654793_133664301	Pig.23430.1	MSTRG.10349,Pig.09034	Pig.23430	circRNA	mRNA	1	0.071345	0.733212	0.00666123	0.123576	Chr07_17502(-0.815075660799|-0.867132867133)	MSTRG.10349,Pig.09034	ASAP2-202	arf-GAP with SH3 domain, ANK repeat and PH domain-containing protein 2 isoform X4 [Sus scrofa]	Pig.23430	TK1-201	thymidine kinase, cytosolic [Sus scrofa]	0.969054	0.641609
Chr03_133654793_133664301	Pig.08573.1	MSTRG.10349,Pig.09034	Pig.08573	circRNA	mRNA	1	0.0368421	0.745194	0.00541236	0.119527	ssc-miR-1842(-0.679822931059|-0.812610703272)	MSTRG.10349,Pig.09034	ASAP2-202	arf-GAP with SH3 domain, ANK repeat and PH domain-containing protein 2 isoform X4 [Sus scrofa]	Pig.08573	MIIP-201	migration and invasion-inhibitory protein [Sus scrofa]	0.911026	0.2942
Chr03_133654793_133664301	Pig.18835.1	MSTRG.10349,Pig.09034	Pig.18835	circRNA	mRNA	3	0.0009978	0.66497	0.0183012	0.168318	Chr07_17502(-0.815075660799|-0.676008041947);Chr17_39950(-0.857787049138|-0.630473821505);Chr05_13105(-0.656938391755|-0.835342519204)	MSTRG.10349,Pig.09034	ASAP2-202	arf-GAP with SH3 domain, ANK repeat and PH domain-containing protein 2 isoform X4 [Sus scrofa]	Pig.18835	PIK3R6-203	phosphoinositide 3-kinase regulatory subunit 6 isoform X3 [Sus scrofa]	0.997972	0.378798
Chr03_133654793_133664301	Pig.17744.1	MSTRG.10349,Pig.09034	Pig.17744	circRNA	mRNA	1	0.0368421	0.608637	0.0357109	0.209995	Chr07_17502(-0.815075660799|-0.615384615385)	MSTRG.10349,Pig.09034	ASAP2-202	arf-GAP with SH3 domain, ANK repeat and PH domain-containing protein 2 isoform X4 [Sus scrofa]	Pig.17744	PRKCSH-201	glucosidase 2 subunit beta precursor [Sus scrofa]	0.860401	0.374214
Chr03_133654793_133664301	Pig.14580.1	MSTRG.10349,Pig.09034	Pig.14580	circRNA	mRNA	1	0.0368421	0.734497	0.00651781	0.123576	Chr05_13105(-0.656938391755|-0.791759431245)	MSTRG.10349,Pig.09034	ASAP2-202	arf-GAP with SH3 domain, ANK repeat and PH domain-containing protein 2 isoform X4 [Sus scrofa]	Pig.14580	TMEM173-202	stimulator of interferon genes protein isoform X3 [Sus scrofa]	0.906936	0.269037
Chr03_133654793_133664301	MSTRG.10050.1	MSTRG.10349,Pig.09034	MSTRG.10050	circRNA	mRNA	1	0.071345	0.656056	0.0205168	0.174251	Chr12_28849(-0.70473790759|-0.718039630047)	MSTRG.10349,Pig.09034	ASAP2-202	arf-GAP with SH3 domain, ANK repeat and PH domain-containing protein 2 isoform X4 [Sus scrofa]	MSTRG.10050			0.990651	0.352231
Chr05_66006614_66013845	Pig.08573.1	Pig.07499	Pig.08573	circRNA	mRNA	1	0.00526316	0.612961	0.0340673	0.207077	ssc-miR-1842(-0.839160839161|-0.812610703272)	Pig.07499	KDM5A-201	lysine-specific demethylase 5A [Sus scrofa]	Pig.08573	MIIP-201	migration and invasion-inhibitory protein [Sus scrofa]	0.983926	0.830484
Chr16_2873629_2883354	MSTRG.30891.2	Pig.13821	MSTRG.30891	circRNA	mRNA	1	0.0421053	0.685315	0.013906	0.152823	mir-874:ssc-miR-874(-0.615384615385|-0.783216783217)	Pig.13821	ADCY2-201	LOW QUALITY PROTEIN: adenylate cyclase type 2 [Sus scrofa]	MSTRG.30891			0.88	0.270412
Chr06_59614387_59640281	MSTRG.11408.1	Pig.03617	MSTRG.11408	circRNA	mRNA	1	0.0263158	0.65035	0.0220342	0.178309	mir-486:ssc-miR-486(-0.79020979021|-0.671328671329)	Pig.03617	SS18-203	PREDICTED: protein SSXT [Otolemur garnettii]	MSTRG.11408			0.91866	0.386465
Chr06_59614387_59640281	MSTRG.30891.2	Pig.03617	MSTRG.30891	circRNA	mRNA	1	0.180804	0.755245	0.00450844	0.112606	mir-486:ssc-miR-486(-0.79020979021|-0.629370629371)	Pig.03617	SS18-203	PREDICTED: protein SSXT [Otolemur garnettii]	MSTRG.30891			0.8867	0.213688
Chr06_59614387_59640281	MSTRG.18963.2	Pig.03617	MSTRG.18963	circRNA	mRNA	2	0.0107826	0.622378	0.0306759	0.199692	ssc-miR-1842(-0.734265734266|-0.671328671329);Chr12_28094(-0.70402910068|-0.774081747514)	Pig.03617	SS18-203	PREDICTED: protein SSXT [Otolemur garnettii]	MSTRG.18963			0.997874	0.407664
Chr06_59614387_59640281	Pig.11957.1	Pig.03617	Pig.11957	circRNA	mRNA	1	0.0263158	0.616463	0.032776	0.205087	mir-486:ssc-miR-486(-0.79020979021|-0.686515938972)	Pig.03617	SS18-203	PREDICTED: protein SSXT [Otolemur garnettii]	Pig.11957	ANGPT4-201	angiopoietin-4 [Sus scrofa]	0.929781	0.45046
Chr06_59614387_59640281	Pig.21160.1	Pig.03617	Pig.21160	circRNA	mRNA	1	0.0263158	0.658495	0.0198921	0.173534	ssc-miR-1842(-0.734265734266|-0.630473821505)	Pig.03617	SS18-203	PREDICTED: protein SSXT [Otolemur garnettii]	Pig.21160	SYNPO	LOW QUALITY PROTEIN: synaptopodin [Sus scrofa]	0.923947	0.287372
Chr06_59614387_59640281	Pig.19967.1	Pig.03617	Pig.19967	circRNA	mRNA	1	0.0263158	0.72028	0.00823977	0.128514	mir-486:ssc-miR-486(-0.79020979021|-0.902097902098)	Pig.03617	SS18-203	PREDICTED: protein SSXT [Otolemur garnettii]	Pig.19967	CTSF-201	cathepsin F isoform X3 [Sus scrofa]	0.933884	0.692173
Chr06_59614387_59640281	Pig.08573.1	Pig.03617	Pig.08573	circRNA	mRNA	1	0.0263158	0.609458	0.0353946	0.209995	ssc-miR-1842(-0.734265734266|-0.812610703272)	Pig.03617	SS18-203	PREDICTED: protein SSXT [Otolemur garnettii]	Pig.08573	MIIP-201	migration and invasion-inhibitory protein [Sus scrofa]	0.949353	0.577142
Chr13_77941061_77989213	MSTRG.8524.2	Pig.07494	MSTRG.8524	circRNA	mRNA	1	0.0312448	0.654386	0.0209527	0.17526	mir-361:ssc-miR-361-3p(-0.626971189163|-0.619965924479)	Pig.07494	IFT80-201	intraflagellar transport protein 80 homolog isoform X1 [Sus scrofa]	MSTRG.8524			0.994382	0.219734
Chr13_49949943_49952296	Pig.20594.1	Pig.06033	Pig.20594	circRNA	mRNA	1	0.0210526	0.601771	0.0384366	0.216593	mir-423:ssc-miR-423-5p(-0.669030674444|-0.899836760121)	Pig.06033	EEFSEC-201	selenocysteine-specific elongation factor isoform X1 [Sus scrofa]	Pig.20594	LRRC14-202	leucine-rich repeat-containing protein 14 [Sus scrofa]	0.852884	0.602534
Chr13_49949943_49952296	MSTRG.30891.2	Pig.06033	MSTRG.30891	circRNA	mRNA	1	0.0421053	0.711285	0.00949192	0.134875	mir-423:ssc-miR-423-5p(-0.669030674444|-0.818181818182)	Pig.06033	EEFSEC-201	selenocysteine-specific elongation factor isoform X1 [Sus scrofa]	MSTRG.30891			0.899711	0.327749
Chr08_199054_201246	MSTRG.30891.2	Pig.22565	MSTRG.30891	circRNA	mRNA	1	0.117108	0.755245	0.00450844	0.112606	mir-423:ssc-miR-423-5p(-0.601398601399|-0.818181818182)	Pig.22565	ABLIM2-201	LOW QUALITY PROTEIN: actin-binding LIM protein 2 [Sus scrofa]	MSTRG.30891			0.847291	0.182297
Chr08_135970698_135973229	Pig.16593.1	Pig.00557	Pig.16593	circRNA	mRNA	2	0.000334169	0.697619	0.0116589	0.145686	Chr02_6600(-0.609095578402|-0.675391717366);Chr02_6599(-0.609095578402|-0.675391717366)	Pig.00557	WDFY3-201	LOW QUALITY PROTEIN: WD repeat and FYVE domain-containing protein 3 [Sus scrofa]	Pig.16593	PGPEP1L-201	pyroglutamyl-peptidase 1-like protein isoform X1 [Sus scrofa]	0.997336	0.208215
Chr08_135970698_135973229	MSTRG.21578.1	Pig.00557	MSTRG.21578	circRNA	mRNA	1	0.0986861	0.699301	0.0113742	0.14423	mir-31:ssc-miR-31(-0.743864228172|-0.59298610642)	Pig.00557	WDFY3-201	LOW QUALITY PROTEIN: WD repeat and FYVE domain-containing protein 3 [Sus scrofa]	MSTRG.21578			0.887139	0.219508
Chr08_135970698_135973229	Pig.15350.1	Pig.00557	Pig.15350	circRNA	mRNA	2	0.000334169	0.592986	0.0421356	0.223159	Chr02_6600(-0.609095578402|-0.578491705004);Chr02_6599(-0.609095578402|-0.578491705004)	Pig.00557	WDFY3-201	LOW QUALITY PROTEIN: WD repeat and FYVE domain-containing protein 3 [Sus scrofa]	Pig.15350	SLC43A1-201	LOW QUALITY PROTEIN: large neutral amino acids transporter small subunit 3 [Sus scrofa]	0.999336	0.221024
Chr13_123966963_123968567	Pig.00276.1	Pig.02114	Pig.00276	circRNA	mRNA	2	5.56948e-05	0.72028	0.00823977	0.128514	Chr17_38858(-0.746867197326|-0.783122886517);Chr17_38857(-0.746867197326|-0.783122886517)	Pig.02114	ZBTB20-201	zinc finger and BTB domain-containing protein 20 isoform X1 [Sus scrofa]	Pig.00276	SFT2D3-201	vesicle transport protein SFT2C [Sus scrofa]	0.999438	0.392873
Chr13_123966963_123968567	Pig.19425.1	Pig.02114	Pig.19425	circRNA	mRNA	2	5.56948e-05	0.624363	0.0299932	0.199692	Chr17_38858(-0.746867197326|-0.691302020004);Chr17_38857(-0.746867197326|-0.691302020004)	Pig.02114	ZBTB20-201	zinc finger and BTB domain-containing protein 20 isoform X1 [Sus scrofa]	Pig.19425	Pig.19425	PREDICTED: predicted GPI-anchored protein 58 [Monodelphis domestica]	0.998507	0.399483
Chr09_117715212_117716726	Pig.20592.1	Pig.08150	Pig.20592	circRNA	mRNA	1	0.0312448	0.692308	0.012593	0.148606	mir-361:ssc-miR-361-3p(-0.671328671329|-0.643356643357)	Pig.08150	MAML2-201	mastermind-like protein 2 isoform X2 [Sus scrofa]	Pig.20592	MFSD3-201	major facilitator superfamily domain-containing protein 3 isoform X2 [Sus scrofa]	0.978723	0.233371
Chr09_117715212_117716726	MSTRG.11408.1	Pig.08150	MSTRG.11408	circRNA	mRNA	1	0.0157895	0.685315	0.013906	0.152823	mir-486:ssc-miR-486(-0.636363636364|-0.671328671329)	Pig.08150	MAML2-201	mastermind-like protein 2 isoform X2 [Sus scrofa]	MSTRG.11408			0.973262	0.233862
Chr09_117715212_117716726	MSTRG.30891.2	Pig.08150	MSTRG.30891	circRNA	mRNA	2	0.00452905	0.65035	0.0220342	0.178309	mir-361:ssc-miR-361-3p(-0.671328671329|-0.811188811189);mir-486:ssc-miR-486(-0.636363636364|-0.629370629371)	Pig.08150	MAML2-201	mastermind-like protein 2 isoform X2 [Sus scrofa]	MSTRG.30891			0.995535	0.319933
Chr09_117715212_117716726	MSTRG.21578.1	Pig.08150	MSTRG.21578	circRNA	mRNA	1	0.0756323	0.629371	0.0283197	0.195771	mir-361:ssc-miR-361-3p(-0.671328671329|-0.776223776224)	Pig.08150	MAML2-201	mastermind-like protein 2 isoform X2 [Sus scrofa]	MSTRG.21578			0.927536	0.397664
Chr09_117715212_117716726	Pig.19967.1	Pig.08150	Pig.19967	circRNA	mRNA	1	0.0157895	0.608392	0.035806	0.209995	mir-486:ssc-miR-486(-0.636363636364|-0.902097902098)	Pig.08150	MAML2-201	mastermind-like protein 2 isoform X2 [Sus scrofa]	Pig.19967	CTSF-201	cathepsin F isoform X3 [Sus scrofa]	0.827273	0.505263
Chr09_117715212_117716726	MSTRG.8524.2	Pig.08150	MSTRG.8524	circRNA	mRNA	1	0.0463686	0.612961	0.0340673	0.207077	mir-361:ssc-miR-361-3p(-0.671328671329|-0.619965924479)	Pig.08150	MAML2-201	mastermind-like protein 2 isoform X2 [Sus scrofa]	MSTRG.8524			0.960224	0.274615
Chr15_135558232_135560464	MSTRG.18963.2	Pig.08750	MSTRG.18963	circRNA	mRNA	1	0.0368421	0.62384	0.030172	0.199692	Chr17_39355(-0.662829740907|-0.685314685315)	Pig.08750	DGKD-201	diacylglycerol kinase delta isoform X2 [Sus scrofa]	MSTRG.18963			0.983322	0.312826
Chr09_97952264_97963163	Pig.08573.1	Pig.12764	Pig.08573	circRNA	mRNA	1	0.00526316	0.657378	0.0201764	0.173534	ssc-miR-1842(-0.804876300031|-0.812610703272)	Pig.12764	USP28-202	ubiquitin carboxyl-terminal hydrolase 28 isoform X6 [Sus scrofa]	Pig.08573	MIIP-201	migration and invasion-inhibitory protein [Sus scrofa]	0.995218	0.647758
Chr01_85151011_85183307	Pig.09067.1	Pig.02853	Pig.09067	circRNA	mRNA	1	0.00526316	0.585969	0.0452666	0.227083	mir-331:ssc-miR-331-3p(-0.622377622378|-0.75088181523)	Pig.02853	MYO9A-201	unconventional myosin-IXa isoform X1 [Sus scrofa]	Pig.09067	PMS2-201	mismatch repair endonuclease PMS2 isoform X1 [Sus scrofa]	0.906424	0.356469
Chr06_61228450_61283077	MSTRG.18963.2	MSTRG.15623,Pig.03622	MSTRG.18963	circRNA	mRNA	1	0.187792	0.59895	0.0395981	0.218821	Chr12_28094(-0.621052631579|-0.774081747514)	MSTRG.15623,Pig.03622	OSBPL1A-205	oxysterol-binding protein-related protein 1 isoform X1 [Sus scrofa]	MSTRG.18963			0.890312	0.360727
Chr06_61228450_61283077	Pig.07914.1	MSTRG.15623,Pig.03622	Pig.07914	circRNA	mRNA	1	0.0315789	0.669003	0.0173586	0.164599	Chr09_23231(-0.628322851401|-0.688858094621)	MSTRG.15623,Pig.03622	OSBPL1A-205	oxysterol-binding protein-related protein 1 isoform X1 [Sus scrofa]	Pig.07914	CCDC51-201	coiled-coil domain-containing protein 51 isoform X1 [Sus scrofa]	0.954042	0.2502
Chr06_61228450_61283077	Pig.10345.1	MSTRG.15623,Pig.03622	Pig.10345	circRNA	mRNA	1	0.0897776	0.617544	0.0323849	0.205087	Chr02_7181(-0.642105263158|-0.677192982456)	MSTRG.15623,Pig.03622	OSBPL1A-205	oxysterol-binding protein-related protein 1 isoform X1 [Sus scrofa]	Pig.10345	ZNF263-201	zinc finger protein 263 isoform X1 [Sus scrofa]	0.973404	0.293628
Chr06_61228450_61283077	Pig.12620.1	MSTRG.15623,Pig.03622	Pig.12620	circRNA	mRNA	1	0.0614871	0.680702	0.0148257	0.159036	Chr02_7181(-0.642105263158|-0.79298245614)	MSTRG.15623,Pig.03622	OSBPL1A-205	oxysterol-binding protein-related protein 1 isoform X1 [Sus scrofa]	Pig.12620	FAAH-201	fatty-acid amide hydrolase 1 [Sus scrofa]	0.894866	0.313458
Chr06_16875956_16911354	Pig.00276.1	Pig.15137	Pig.00276	circRNA	mRNA	2	0.000556948	0.615385	0.0331699	0.205087	Chr17_38858(-0.703360370298|-0.783122886517);Chr17_38857(-0.703360370298|-0.783122886517)	Pig.15137	FGGY-202	FGGY carbohydrate kinase domain-containing protein isoform X5 [Sus scrofa]	Pig.00276	SFT2D3-201	vesicle transport protein SFT2C [Sus scrofa]	0.997121	0.46932
Chr06_74056079_74060782	MSTRG.30891.2		MSTRG.30891	circRNA	mRNA	1	0.0810916	0.674356	0.0161631	0.162623	mir-361:ssc-miR-361-3p(-0.877387678413|-0.811188811189)				MSTRG.30891			0.960796	0.807554
Chr06_74056079_74060782	MSTRG.21578.1		MSTRG.21578	circRNA	mRNA	1	0.0515177	0.623598	0.0302549	0.199692	mir-361:ssc-miR-361-3p(-0.877387678413|-0.776223776224)				MSTRG.21578			0.938822	0.813531
Chr13_181183940_181207763	Pig.08828.1		Pig.08828	circRNA	mRNA	1	0.0157895	0.609096	0.0355341	0.209995	Chr06_14877(-0.595635535432|-0.86865282074)				Pig.08828	UNC45A-201	protein unc-45 homolog A isoform X2 [Sus scrofa]	0.81355	0.378677
Chr17_56923481_56931936	Pig.20592.1		Pig.20592	circRNA	mRNA	1	0.0515177	0.71804	0.00853932	0.130155	mir-361:ssc-miR-361-3p(-0.756568585805|-0.643356643357)				Pig.20592	MFSD3-201	major facilitator superfamily domain-containing protein 3 isoform X2 [Sus scrofa]	0.91913	0.256016
Chr17_56923481_56931936	MSTRG.30891.2		MSTRG.30891	circRNA	mRNA	1	0.180804	0.679511	0.0150702	0.159036	mir-361:ssc-miR-361-3p(-0.756568585805|-0.811188811189)				MSTRG.30891			0.96516	0.507463
Chr17_56923481_56931936	MSTRG.21578.1		MSTRG.21578	circRNA	mRNA	1	0.120705	0.672505	0.0165693	0.162623	mir-361:ssc-miR-361-3p(-0.756568585805|-0.776223776224)				MSTRG.21578			0.987177	0.465748
Chr17_56923481_56931936	Pig.12673.1		Pig.12673	circRNA	mRNA	2	0.000556948	0.609458	0.0353946	0.209995	Chr08_21314(-0.729824561404|-0.68301330663);Chr08_21313(-0.729824561404|-0.68301330663)				Pig.12673	HYI-202	putative hydroxypyruvate isomerase isoform X1 [Sus scrofa]	0.998902	0.387204
Chr17_56923481_56931936	MSTRG.8524.2		MSTRG.8524	circRNA	mRNA	1	0.0756323	0.836842	0.000687681	0.0767553	mir-361:ssc-miR-361-3p(-0.756568585805|-0.619965924479)				MSTRG.8524			0.900763	0.120004
Chr10_43927796_43941092	Pig.11889.1	MSTRG.26640,Pig.20497	Pig.11889	circRNA	mRNA	1	0.0157895	0.608392	0.035806	0.209995	ChrX_42092(-0.587412587413|-0.776223776224)	MSTRG.26640,Pig.20497	UPF2-201	PREDICTED: regulator of nonsense transcripts 2 isoform X2 [Pteropus alecto]	Pig.11889	E2F1-201	transcription factor E2F1 [Sus scrofa]	0.861538	0.309643
Chr06_3676548_3758580	MSTRG.11408.1	MSTRG.14981	MSTRG.11408	circRNA	mRNA	1	0.0684211	0.577479	0.0492696	0.233079	mir-486:ssc-miR-486(-0.577479108467|-0.671328671329)	MSTRG.14981			MSTRG.11408			0.924849	0.263804
Chr06_3676548_3758580	MSTRG.30891.2	MSTRG.14981	MSTRG.30891	circRNA	mRNA	2	0.0842873	0.598606	0.0397413	0.218822	mir-486:ssc-miR-486(-0.577479108467|-0.629370629371);mir-423:ssc-miR-423-5p(-0.640860961836|-0.818181818182)	MSTRG.14981			MSTRG.30891			0.991691	0.329147
Chr06_3676548_3758580	MSTRG.18963.2	MSTRG.14981	MSTRG.18963	circRNA	mRNA	2	0.0672583	0.633819	0.0268907	0.192217	ssc-miR-1842(-0.612691249227|-0.671328671329);Chr17_39355(-0.732412527812|-0.685314685315)	MSTRG.14981			MSTRG.18963			0.998405	0.310898
Chr06_3676548_3758580	Pig.02573.1	MSTRG.14981	Pig.02573	circRNA	mRNA	1	0.0684211	0.626776	0.0291781	0.198294	mir-423:ssc-miR-423-5p(-0.640860961836|-0.601398601399)	MSTRG.14981			Pig.02573	DBN1-201	drebrin isoform X1 [Sus scrofa]	0.968233	0.23324
Chr06_3676548_3758580	Pig.16362.1	MSTRG.14981	Pig.16362	circRNA	mRNA	1	0.128154	0.577479	0.0492696	0.233079	mir-423:ssc-miR-423-5p(-0.640860961836|-0.748251748252)	MSTRG.14981			Pig.16362	Hps6	Hermansky-Pudlak syndrome 6 protein [Sus scrofa]	0.922691	0.385139
Chr06_3676548_3758580	Pig.04515.1	MSTRG.14981	Pig.04515	circRNA	mRNA	1	0.0684211	0.608851	0.0356286	0.209995	mir-331:ssc-miR-331-3p(-0.669030674444|-0.608092810551)	MSTRG.14981			Pig.04515	SLITRK1-201	SLIT and NTRK-like protein 1 precursor [Sus scrofa]	0.952285	0.266464
Chr06_3676548_3758580	Pig.18198.1	MSTRG.14981	Pig.18198	circRNA	mRNA	1	0.0684211	0.742309	0.00569538	0.119527	ssc-miR-7142-3p(-0.640860961836|-0.674758140081)	MSTRG.14981			Pig.18198	KNDC1-201	LOW QUALITY PROTEIN: protein very KIND [Sus scrofa]	0.974235	0.195355
Chr06_3676548_3758580	MSTRG.37007.3	MSTRG.14981	MSTRG.37007	circRNA	mRNA	1	0.128154	0.631463	0.0276408	0.195771	mir-196:ssc-miR-196a(-0.61973367738|-0.757663141906)	MSTRG.14981			MSTRG.37007			0.899862	0.315352
Chr06_3676548_3758580	MSTRG.31462.1	MSTRG.14981	MSTRG.31462	circRNA	mRNA	1	0.321345	0.64172	0.0244817	0.186127	mir-331:ssc-miR-331-3p(-0.669030674444|-0.654917522422)	MSTRG.14981			MSTRG.31462			0.98934	0.279296
Chr06_3676548_3758580	Pig.08826.1	MSTRG.14981	Pig.08826	circRNA	mRNA	1	0.0684211	0.637169	0.0258492	0.189707	mir-331:ssc-miR-331-3p(-0.669030674444|-0.601062835862)	MSTRG.14981			Pig.08826	UROC1-203	urocanate hydratase [Sus scrofa]	0.946486	0.241476
Chr06_3676548_3758580	Pig.12620.1	MSTRG.14981	Pig.12620	circRNA	mRNA	1	0.128154	0.624347	0.0299985	0.199692	mir-423:ssc-miR-423-5p(-0.640860961836|-0.917689673523)	MSTRG.14981			Pig.12620	FAAH-201	fatty-acid amide hydrolase 1 [Sus scrofa]	0.822381	0.505537
Chr06_3676548_3758580	Pig.07964.1	MSTRG.14981	Pig.07964	circRNA	mRNA	1	0.128154	0.650181	0.0220803	0.178309	Chr13_30396(-0.577479108467|-0.754390608759)	MSTRG.14981			Pig.07964	MYO16	LOW QUALITY PROTEIN: unconventional myosin-XVI [Sus scrofa]	0.867171	0.24986
Chr06_3676548_3758580	Pig.21160.1	MSTRG.14981	Pig.21160	circRNA	mRNA	1	0.0684211	0.624347	0.0299985	0.199692	ssc-miR-1842(-0.612691249227|-0.630473821505)	MSTRG.14981			Pig.21160	SYNPO	LOW QUALITY PROTEIN: synaptopodin [Sus scrofa]	0.985696	0.236281
Chr06_3676548_3758580	Pig.17713.1	MSTRG.14981	Pig.17713	circRNA	mRNA	1	0.262578	0.717319	0.0086374	0.131276	Chr13_30396(-0.577479108467|-0.785969750521)	MSTRG.14981			Pig.17713	FBN3-203	fibrillin-3 [Sus scrofa]	0.847086	0.195407
Chr06_3676548_3758580	Pig.18928.1	MSTRG.14981	Pig.18928	circRNA	mRNA	1	0.0684211	0.654946	0.0208059	0.174251	mir-664:ssc-miR-664-5p(-0.647903389988|-0.629370629371)	MSTRG.14981			Pig.18928	ISG12(A)-202	uncharacterized protein LOC100153902 [Sus scrofa]	0.98549	0.237378
Chr06_3676548_3758580	Pig.09158.1	MSTRG.14981	Pig.09158	circRNA	mRNA	1	0.179961	0.584522	0.045932	0.227326	mir-331:ssc-miR-331-3p(-0.669030674444|-0.615384615385)	MSTRG.14981			Pig.09158	SLC12A9-201	solute carrier family 12 member 9 isoform X1 [Sus scrofa]	0.958233	0.289542
Chr06_3676548_3758580	Pig.19885.1	MSTRG.14981	Pig.19885	circRNA	mRNA	1	0.0684211	0.711285	0.00949192	0.134875	mir-423:ssc-miR-423-5p(-0.640860961836|-0.643356643357)	MSTRG.14981			Pig.19885	CYC1-201	cytochrome c1, heme protein, mitochondrial [Sus scrofa]	0.998057	0.202545
Chr06_3676548_3758580	MSTRG.10050.1	MSTRG.14981	MSTRG.10050	circRNA	mRNA	1	0.128154	0.712532	0.00931039	0.134449	ssc-miR-7142-3p(-0.640860961836|-0.630473821505)	MSTRG.14981			MSTRG.10050			0.99183	0.194819
Chr10_71924540_71931190	Pig.18656.1	Pig.05072	Pig.18656	circRNA	mRNA	1	0.0312448	0.661988	0.0190217	0.170274	mir-504:ssc-miR-504(-0.584521536619|-0.748251748252)	Pig.05072	UBAP1-202	ubiquitin-associated protein 1 isoform X3 [Sus scrofa]	Pig.18656	ARRB2-201	beta-arrestin-2 isoform X3 [Sus scrofa]	0.877151	0.244698
Chr09_102579981_102597042	Pig.07590.1	Pig.08199	Pig.07590	circRNA	mRNA	1	0.0105263	0.583634	0.0463438	0.229047	mir-664:ssc-miR-664-3p(-0.647903389988|-0.710287260204)	Pig.08199	ATM-201	serine-protein kinase ATM [Sus scrofa]	Pig.07590	DHH-201	PREDICTED: desert hedgehog protein [Microtus ochrogaster]	0.954068	0.353422
Chr07_23444137_23455147	Pig.14610.1	Pig.19585	Pig.14610	circRNA	mRNA	1	0.118964	0.767076	0.00359618	0.103583	Chr02_7024(-0.694060060506|-0.707755967861)	Pig.19585	TUBB2B-205	Tubulin beta-2A chain [Fukomys damarensis]	Pig.14610	AK8-201	adenylate kinase 8 isoform X3 [Sus scrofa]	0.99023	0.224692
Chr07_23444137_23455147	Pig.20592.1	Pig.19585	Pig.20592	circRNA	mRNA	1	0.118964	0.727273	0.00735503	0.127324	mir-361:ssc-miR-361-3p(-0.636363636364|-0.643356643357)	Pig.19585	TUBB2B-205	Tubulin beta-2A chain [Fukomys damarensis]	Pig.20592	MFSD3-201	major facilitator superfamily domain-containing protein 3 isoform X2 [Sus scrofa]	0.994536	0.189022
Chr07_23444137_23455147	Pig.14973.1	Pig.19585	Pig.14973	circRNA	mRNA	3	0.000195524	0.701759	0.0109673	0.143837	Chr08_21314(-0.749563321122|-0.627417489163);Chr08_21313(-0.749563321122|-0.627417489163);Chr07_19592(-0.797202797203|-0.757899402288)	Pig.19585	TUBB2B-205	Tubulin beta-2A chain [Fukomys damarensis]	Pig.14973	SLC2A10-201	LOW QUALITY PROTEIN: solute carrier family 2, facilitated glucose transporter member 10 [Sus scrofa]	0.999529	0.319805
Chr07_23444137_23455147	Pig.15471.1	Pig.19585	Pig.15471	circRNA	mRNA	1	0.0631579	0.664336	0.0184527	0.168318	Chr09_23263(-0.587412587413|-0.608391608392)	Pig.19585	TUBB2B-205	Tubulin beta-2A chain [Fukomys damarensis]	Pig.15471	PALD1-201	LOW QUALITY PROTEIN: paladin [Sus scrofa]	0.982456	0.186416
Chr07_23444137_23455147	MSTRG.30891.2	Pig.19585	MSTRG.30891	circRNA	mRNA	1	0.329739	0.818182	0.00114311	0.0854743	mir-361:ssc-miR-361-3p(-0.636363636364|-0.811188811189)	Pig.19585	TUBB2B-205	Tubulin beta-2A chain [Fukomys damarensis]	MSTRG.30891			0.879227	0.148767
Chr07_23444137_23455147	Pig.07970.1	Pig.19585	Pig.07970	circRNA	mRNA	1	0.247952	0.65035	0.0220342	0.178309	Chr07_19592(-0.797202797203|-0.678321678322)	Pig.19585	TUBB2B-205	Tubulin beta-2A chain [Fukomys damarensis]	Pig.07970	LLGL2-202	lethal(2) giant larvae protein homolog 2 [Sus scrofa]	0.919431	0.403296
Chr07_23444137_23455147	Pig.14953.1	Pig.19585	Pig.14953	circRNA	mRNA	1	0.0631579	0.741259	0.00580115	0.119527	ssc-miR-7137-3p(-0.629370629371|-0.629370629371)	Pig.19585	TUBB2B-205	Tubulin beta-2A chain [Fukomys damarensis]	Pig.14953	NEURL2-201	neuralized-like protein 2 [Sus scrofa]	1	0.169714
Chr07_23444137_23455147	Pig.22620.1	Pig.19585	Pig.22620	circRNA	mRNA	3	0.00560878	0.79021	0.00222314	0.0938036	Chr08_21314(-0.749563321122|-0.672505409605);Chr08_21313(-0.749563321122|-0.672505409605);Chr07_19592(-0.797202797203|-0.755244755245)	Pig.19585	TUBB2B-205	Tubulin beta-2A chain [Fukomys damarensis]	Pig.22620	RGS12-201	LOW QUALITY PROTEIN: regulator of G-protein signaling 12 [Sus scrofa]	0.999887	0.242362
Chr07_23444137_23455147	Pig.06857.1	Pig.19585	Pig.06857	circRNA	mRNA	1	0.0631579	0.664336	0.0184527	0.168318	Chr07_19592(-0.797202797203|-0.657342657343)	Pig.19585	TUBB2B-205	Tubulin beta-2A chain [Fukomys damarensis]	Pig.06857	ADIPOQ-202	complement C1q tumor necrosis factor-related protein 5 [Sus scrofa]	0.903846	0.355951
Chr07_23444137_23455147	Pig.10304.1	Pig.19585	Pig.10304	circRNA	mRNA	1	0.118964	0.741259	0.00580115	0.119527	Chr07_19592(-0.797202797203|-0.594405594406)	Pig.19585	TUBB2B-205	Tubulin beta-2A chain [Fukomys damarensis]	Pig.10304	ABCA3-204	ATP-binding cassette sub-family A member 3 [Sus scrofa]	0.854271	0.190474
Chr07_23444137_23455147	Pig.16028.1	Pig.19585	Pig.16028	circRNA	mRNA	1	0.21083	0.691232	0.0127887	0.149599	Chr09_23263(-0.587412587413|-0.708776292881)	Pig.19585	TUBB2B-205	Tubulin beta-2A chain [Fukomys damarensis]	Pig.16028	WDR62-201	WD repeat-containing protein 62 [Sus scrofa]	0.906369	0.209731
Chr07_23444137_23455147	Pig.20387.1	Pig.19585	Pig.20387	circRNA	mRNA	2	0.00367586	0.783217	0.00258621	0.0962432	Chr02_6600(-0.61634671624|-0.710611508136);Chr02_6599(-0.61634671624|-0.710611508136)	Pig.19585	TUBB2B-205	Tubulin beta-2A chain [Fukomys damarensis]	Pig.20387	HDHD3-201	haloacid dehalogenase-like hydrolase domain-containing protein 3 [Sus scrofa]	0.994954	0.160113
Chr07_23444137_23455147	MSTRG.18963.2	Pig.19585	MSTRG.18963	circRNA	mRNA	1	0.306974	0.741259	0.00580115	0.119527	ssc-miR-1842(-0.734265734266|-0.671328671329)	Pig.19585	TUBB2B-205	Tubulin beta-2A chain [Fukomys damarensis]	MSTRG.18963			0.955224	0.247713
Chr07_23444137_23455147	Pig.08828.1	Pig.19585	Pig.08828	circRNA	mRNA	1	0.168005	0.706294	0.0102452	0.139666	Chr09_23263(-0.587412587413|-0.601398601399)	Pig.19585	TUBB2B-205	Tubulin beta-2A chain [Fukomys damarensis]	Pig.08828	UNC45A-201	protein unc-45 homolog A isoform X2 [Sus scrofa]	0.988235	0.160306
Chr07_23444137_23455147	Pig.18699.1	Pig.19585	Pig.18699	circRNA	mRNA	1	0.247952	0.601399	0.0385885	0.216593	Chr02_7024(-0.694060060506|-0.683382213421)	Pig.19585	TUBB2B-205	Tubulin beta-2A chain [Fukomys damarensis]	Pig.18699	NCAPD2-202	condensin complex subunit 1 isoform X1 [Sus scrofa]	0.992248	0.35959
Chr07_23444137_23455147	Pig.22207.1	Pig.19585	Pig.22207	circRNA	mRNA	1	0.118964	0.656144	0.0204939	0.174251	Chr09_23263(-0.587412587413|-0.628074041711)	Pig.19585	TUBB2B-205	Tubulin beta-2A chain [Fukomys damarensis]	Pig.22207	MYO7A-201	unconventional myosin-VIIa [Sus scrofa]	0.966547	0.200081
Chr07_23444137_23455147	Pig.10513.1	Pig.19585	Pig.10513	circRNA	mRNA	1	0.118964	0.647987	0.0226858	0.18051	Chr09_23263(-0.587412587413|-0.623468556821)	Pig.19585	TUBB2B-205	Tubulin beta-2A chain [Fukomys damarensis]	Pig.10513	THBS3-201	thrombospondin-3 [Sus scrofa]	0.970223	0.202696
Chr07_23444137_23455147	Pig.07672.1	Pig.19585	Pig.07672	circRNA	mRNA	1	0.247952	0.577934	0.0490488	0.233043	ssc-miR-7137-3p(-0.629370629371|-0.872155453081)	Pig.19585	TUBB2B-205	Tubulin beta-2A chain [Fukomys damarensis]	Pig.07672	ESPL1-201	LOW QUALITY PROTEIN: separin [Sus scrofa]	0.838308	0.501589
Chr07_23444137_23455147	Pig.16593.1	Pig.19585	Pig.16593	circRNA	mRNA	2	0.00367586	0.868465	0.000247625	0.0636259	Chr02_6600(-0.61634671624|-0.675391717366);Chr02_6599(-0.61634671624|-0.675391717366)	Pig.19585	TUBB2B-205	Tubulin beta-2A chain [Fukomys damarensis]	Pig.16593	PGPEP1L-201	pyroglutamyl-peptidase 1-like protein isoform X1 [Sus scrofa]	0.997911	0.0898088
Chr07_23444137_23455147	MSTRG.9483.1	Pig.19585	MSTRG.9483	circRNA	mRNA	1	0.118964	0.734266	0.00654349	0.123576	Chr09_23263(-0.587412587413|-0.706293706294)	Pig.19585	TUBB2B-205	Tubulin beta-2A chain [Fukomys damarensis]	MSTRG.9483			0.908108	0.176796
Chr07_23444137_23455147	Pig.16362.1	Pig.19585	Pig.16362	circRNA	mRNA	1	0.118964	0.671329	0.0168315	0.162623	Chr09_23263(-0.587412587413|-0.643356643357)	Pig.19585	TUBB2B-205	Tubulin beta-2A chain [Fukomys damarensis]	Pig.16362	Hps6	Hermansky-Pudlak syndrome 6 protein [Sus scrofa]	0.954545	0.197749
Chr07_23444137_23455147	Pig.06870.1	Pig.19585	Pig.06870	circRNA	mRNA	1	0.118964	0.678322	0.0153173	0.159036	ssc-miR-7137-3p(-0.629370629371|-0.608391608392)	Pig.19585	TUBB2B-205	Tubulin beta-2A chain [Fukomys damarensis]	Pig.06870	TECTA-201	alpha-tectorin isoform X1 [Sus scrofa]	0.983051	0.199322
Chr07_23444137_23455147	Pig.10854.1	Pig.19585	Pig.10854	circRNA	mRNA	2	0.00367586	0.734266	0.00654349	0.123576	Chr08_21314(-0.749563321122|-0.630473821505);Chr08_21313(-0.749563321122|-0.630473821505)	Pig.19585	TUBB2B-205	Tubulin beta-2A chain [Fukomys damarensis]	Pig.10854	EPHX1-201	epoxide hydrolase 1 precursor [Sus scrofa]	0.992553	0.224951
Chr07_23444137_23455147	MSTRG.21578.1	Pig.19585	MSTRG.21578	circRNA	mRNA	1	0.247952	0.699301	0.0113742	0.14423	mir-361:ssc-miR-361-3p(-0.636363636364|-0.776223776224)	Pig.19585	TUBB2B-205	Tubulin beta-2A chain [Fukomys damarensis]	MSTRG.21578			0.90099	0.277075
Chr07_23444137_23455147	Pig.03077.1	Pig.19585	Pig.03077	circRNA	mRNA	2	0.00367586	0.65035	0.0220342	0.178309	Chr08_21314(-0.749563321122|-0.68301330663);Chr08_21313(-0.749563321122|-0.68301330663)	Pig.19585	TUBB2B-205	Tubulin beta-2A chain [Fukomys damarensis]	Pig.03077	SDC3-202	PREDICTED: syndecan-3 isoform X4 [Chlorocebus sabaeus]	0.997842	0.364116
Chr07_23444137_23455147	Pig.03571.1	Pig.19585	Pig.03571	circRNA	mRNA	1	0.0631579	0.706294	0.0102452	0.139666	Chr09_23263(-0.587412587413|-0.671328671329)	Pig.19585	TUBB2B-205	Tubulin beta-2A chain [Fukomys damarensis]	Pig.03571	TBC1D2B-201	TBC1 domain family member 2B isoform X2 [Sus scrofa]	0.933333	0.186219
Chr07_23444137_23455147	Pig.18902.1	Pig.19585	Pig.18902	circRNA	mRNA	2	0.0197653	0.706294	0.0102452	0.139666	Chr09_23263(-0.587412587413|-0.594405594406);Chr07_19592(-0.797202797203|-0.72027972028)	Pig.19585	TUBB2B-205	Tubulin beta-2A chain [Fukomys damarensis]	Pig.18902	P3H2-201	prolyl 3-hydroxylase 1 isoform X2 [Sus scrofa]	0.998698	0.274215
Chr07_23444137_23455147	Pig.05975.1	Pig.19585	Pig.05975	circRNA	mRNA	2	0.00367586	0.697024	0.011761	0.145686	Chr08_21314(-0.749563321122|-0.8);Chr08_21313(-0.749563321122|-0.8)	Pig.19585	TUBB2B-205	Tubulin beta-2A chain [Fukomys damarensis]	Pig.05975	REPS2-201	ralBP1-associated Eps domain-containing protein 2 isoform X1 [Sus scrofa]	0.998941	0.45185
Chr07_23444137_23455147	Pig.18196.1	Pig.19585	Pig.18196	circRNA	mRNA	1	0.279851	0.845579	0.000530407	0.0742364	Chr07_19592(-0.797202797203|-0.799391667422)	Pig.19585	TUBB2B-205	Tubulin beta-2A chain [Fukomys damarensis]	Pig.18196	CFAP46-201	cilia- and flagella-associated protein 46 isoform X3 [Sus scrofa]	0.998629	0.271296
Chr07_23444137_23455147	Pig.12624.1	Pig.19585	Pig.12624	circRNA	mRNA	1	0.118964	0.65149	0.0217247	0.178309	ssc-miR-7137-3p(-0.629370629371|-0.654992247896)	Pig.19585	TUBB2B-205	Tubulin beta-2A chain [Fukomys damarensis]	Pig.12624	RAD54L-202	DNA repair and recombination protein RAD54-like [Sus scrofa]	0.980051	0.244042
Chr07_23444137_23455147	Pig.15469.1	Pig.19585	Pig.15469	circRNA	mRNA	1	0.168005	0.587413	0.0446093	0.225097	Chr07_19592(-0.797202797203|-0.65034965035)	Pig.19585	TUBB2B-205	Tubulin beta-2A chain [Fukomys damarensis]	Pig.15469	ADAMTS14-201	LOW QUALITY PROTEIN: A disintegrin and metalloproteinase with thrombospondin motifs 14 [Sus scrofa]	0.898551	0.437059
Chr07_23444137_23455147	Pig.11856.1	Pig.19585	Pig.11856	circRNA	mRNA	1	0.118964	0.823119	0.00100495	0.0847874	Chr07_19592(-0.797202797203|-0.721542262388)	Pig.19585	TUBB2B-205	Tubulin beta-2A chain [Fukomys damarensis]	Pig.11856	TP53I13-201	LOW QUALITY PROTEIN: tumor protein p53-inducible protein 13 [Sus scrofa]	0.950182	0.230038
Chr07_23444137_23455147	Pig.09028.1	Pig.19585	Pig.09028	circRNA	mRNA	1	0.118964	0.577934	0.0490488	0.233043	Chr09_23263(-0.587412587413|-0.623468556821)	Pig.19585	TUBB2B-205	Tubulin beta-2A chain [Fukomys damarensis]	Pig.09028	CMPK2-201	UMP-CMP kinase 2, mitochondrial [Sus scrofa]	0.970223	0.243356
Chr07_23444137_23455147	Pig.18171.1	Pig.19585	Pig.18171	circRNA	mRNA	1	0.118964	0.678322	0.0153173	0.159036	Chr09_23263(-0.587412587413|-0.692307692308)	Pig.19585	TUBB2B-205	Tubulin beta-2A chain [Fukomys damarensis]	Pig.18171	NPR1-201	atrial natriuretic peptide receptor 1 [Sus scrofa]	0.918033	0.213152
Chr07_23444137_23455147	Pig.13071.1	Pig.19585	Pig.13071	circRNA	mRNA	1	0.118964	0.624006	0.0301151	0.199692	ssc-miR-7137-3p(-0.629370629371|-0.702452338586)	Pig.19585	TUBB2B-205	Tubulin beta-2A chain [Fukomys damarensis]	Pig.13071	COL2A1-201	LOW QUALITY PROTEIN: collagen alpha-1(II) chain [Sus scrofa]	0.945127	0.295121
Chr07_23444137_23455147	Pig.22014.1	Pig.19585	Pig.22014	circRNA	mRNA	1	0.0631579	0.612961	0.0340673	0.207077	mir-361:ssc-miR-361-3p(-0.636363636364|-0.64098171853)	Pig.19585	TUBB2B-205	Tubulin beta-2A chain [Fukomys damarensis]	Pig.22014	RABL2B	rab-like protein 2A isoform X2 [Sus scrofa]	0.996385	0.26662
Chr07_23444137_23455147	Pig.12673.1	Pig.19585	Pig.12673	circRNA	mRNA	2	0.00367586	0.86014	0.000331668	0.0703934	Chr08_21314(-0.749563321122|-0.68301330663);Chr08_21313(-0.749563321122|-0.68301330663)	Pig.19585	TUBB2B-205	Tubulin beta-2A chain [Fukomys damarensis]	Pig.12673	HYI-202	putative hydroxypyruvate isomerase isoform X1 [Sus scrofa]	0.997842	0.139989
Chr07_23444137_23455147	Pig.08865.1	Pig.19585	Pig.08865	circRNA	mRNA	1	0.0631579	0.65149	0.0217247	0.178309	Chr07_19592(-0.797202797203|-0.616463292138)	Pig.19585	TUBB2B-205	Tubulin beta-2A chain [Fukomys damarensis]	Pig.08865	MEX3B-201	RNA-binding protein MEX3B isoform X1 [Sus scrofa]	0.872148	0.314806
Chr07_23444137_23455147	Pig.14895.1	Pig.19585	Pig.14895	circRNA	mRNA	1	0.0631579	0.629371	0.0283197	0.195771	ssc-miR-7137-3p(-0.629370629371|-0.699300699301)	Pig.19585	TUBB2B-205	Tubulin beta-2A chain [Fukomys damarensis]	Pig.14895	PRXL2B-201	prostamide/prostaglandin F synthase [Sus scrofa]	0.947368	0.288682
Chr07_23444137_23455147	Pig.02310.1	Pig.19585	Pig.02310	circRNA	mRNA	2	0.00367586	0.663187	0.0187295	0.169932	Chr02_6600(-0.61634671624|-0.669280500039);Chr02_6599(-0.61634671624|-0.669280500039)	Pig.19585	TUBB2B-205	Tubulin beta-2A chain [Fukomys damarensis]	Pig.02310	HDC-201	histidine decarboxylase isoform X1 [Sus scrofa]	0.998305	0.234752
Chr07_23444137_23455147	Pig.12679.1	Pig.19585	Pig.12679	circRNA	mRNA	1	0.118964	0.678322	0.0153173	0.159036	Chr09_23263(-0.587412587413|-0.608391608392)	Pig.19585	TUBB2B-205	Tubulin beta-2A chain [Fukomys damarensis]	Pig.12679	TIE1-201	tyrosine-protein kinase receptor Tie-1 isoform X6 [Sus scrofa]	0.982456	0.178626
Chr07_23444137_23455147	MSTRG.7156.1	Pig.19585	MSTRG.7156	circRNA	mRNA	2	0.0311711	0.664336	0.0184527	0.168318	Chr08_21314(-0.749563321122|-0.605955395113);Chr08_21313(-0.749563321122|-0.605955395113)	Pig.19585	TUBB2B-205	Tubulin beta-2A chain [Fukomys damarensis]	MSTRG.7156			0.988776	0.265272
Chr07_23444137_23455147	Pig.14875.1	Pig.19585	Pig.14875	circRNA	mRNA	1	0.0631579	0.727273	0.00735503	0.127324	ssc-miR-7137-3p(-0.629370629371|-0.608391608392)	Pig.19585	TUBB2B-205	Tubulin beta-2A chain [Fukomys damarensis]	Pig.14875	UBE2L6-202	ubiquitin/ISG15-conjugating enzyme E2 L6 [Sus scrofa]	0.983051	0.168903
Chr07_23444137_23455147	Pig.23427.1	Pig.19585	Pig.23427	circRNA	mRNA	2	0.00367586	0.587413	0.0446093	0.225097	Chr08_21314(-0.749563321122|-0.630473821505);Chr08_21313(-0.749563321122|-0.630473821505)	Pig.19585	TUBB2B-205	Tubulin beta-2A chain [Fukomys damarensis]	Pig.23427	MYO7A-201	Myosin-VIIa [Fukomys damarensis]	0.992553	0.363916
Chr07_23444137_23455147	Pig.07425.1	Pig.19585	Pig.07425	circRNA	mRNA	1	0.118964	0.685315	0.013906	0.152823	ssc-miR-7137-3p(-0.629370629371|-0.58041958042)	Pig.19585	TUBB2B-205	Tubulin beta-2A chain [Fukomys damarensis]	Pig.07425	MYBL2-201	myb-related protein B [Sus scrofa]	0.959538	0.179609
Chr07_23444137_23455147	Pig.10345.1	Pig.19585	Pig.10345	circRNA	mRNA	2	0.010441	0.71804	0.00853932	0.130155	Chr08_21314(-0.749563321122|-0.675438596491);Chr08_21313(-0.749563321122|-0.675438596491)	Pig.19585	TUBB2B-205	Tubulin beta-2A chain [Fukomys damarensis]	Pig.10345	ZNF263-201	zinc finger protein 263 isoform X1 [Sus scrofa]	0.997294	0.284221
Chr07_23444137_23455147	Pig.15350.1	Pig.19585	Pig.15350	circRNA	mRNA	2	0.00367586	0.708776	0.00986519	0.138539	Chr02_6600(-0.61634671624|-0.578491705004);Chr02_6599(-0.61634671624|-0.578491705004)	Pig.19585	TUBB2B-205	Tubulin beta-2A chain [Fukomys damarensis]	Pig.15350	SLC43A1-201	LOW QUALITY PROTEIN: large neutral amino acids transporter small subunit 3 [Sus scrofa]	0.998996	0.160425
Chr07_23444137_23455147	Pig.19056.1	Pig.19585	Pig.19056	circRNA	mRNA	2	0.010441	0.713287	0.00920178	0.1336	Chr08_21314(-0.749563321122|-0.616463292138);Chr08_21313(-0.749563321122|-0.616463292138)	Pig.19585	TUBB2B-205	Tubulin beta-2A chain [Fukomys damarensis]	Pig.19056	NAGLU	PREDICTED: alpha-N-acetylglucosaminidase [Lipotes vexillifer]	0.990506	0.231301
Chr07_23444137_23455147	Pig.00726.1	Pig.19585	Pig.00726	circRNA	mRNA	1	0.0631579	0.79021	0.00222314	0.0938036	Chr07_19592(-0.797202797203|-0.832167832168)	Pig.19585	TUBB2B-205	Tubulin beta-2A chain [Fukomys damarensis]	Pig.00726	MARCKS-201	PREDICTED: myristoylated alanine-rich C-kinase substrate, partial [Camelus dromedarius]	0.978541	0.411435
Chr07_23444137_23455147	Pig.08043.1	Pig.19585	Pig.08043	circRNA	mRNA	1	0.0631579	0.671329	0.0168315	0.162623	ssc-miR-7137-3p(-0.629370629371|-0.783216783217)	Pig.19585	TUBB2B-205	Tubulin beta-2A chain [Fukomys damarensis]	Pig.08043	RGS9-201	regulator of G-protein signaling 9 isoform X1 [Sus scrofa]	0.891089	0.302106
Chr07_23444137_23455147	Pig.17130.1	Pig.19585	Pig.17130	circRNA	mRNA	1	0.0631579	0.769231	0.00344645	0.103583	mir-28:ssc-miR-151-5p(-0.86013986014|-0.713286713287)	Pig.19585	TUBB2B-205	Tubulin beta-2A chain [Fukomys damarensis]	Pig.17130	NADSYN1	glutamine-dependent NAD(+) synthetase isoform X1 [Sus scrofa]	0.906667	0.333677
Chr07_23444137_23455147	Pig.20312.1	Pig.19585	Pig.20312	circRNA	mRNA	1	0.0631579	0.685315	0.013906	0.152823	Chr07_19592(-0.797202797203|-0.713286713287)	Pig.19585	TUBB2B-205	Tubulin beta-2A chain [Fukomys damarensis]	Pig.20312	MATN2-203	collagen, type VI, alpha 1 precursor-like protein [Camelus ferus]	0.944444	0.409556
Chr07_23444137_23455147	Pig.12256.1	Pig.19585	Pig.12256	circRNA	mRNA	1	0.168005	0.671329	0.0168315	0.162623	Chr07_19592(-0.797202797203|-0.727272727273)	Pig.19585	TUBB2B-205	Tubulin beta-2A chain [Fukomys damarensis]	Pig.12256	UHRF1-201	E3 ubiquitin-protein ligase UHRF1 [Sus scrofa]	0.954128	0.450396
Chr07_23444137_23455147	MSTRG.16380.1	Pig.19585	MSTRG.16380	circRNA	mRNA	1	0.118964	0.874126	0.000200713	0.0630114	ssc-miR-7137-3p(-0.629370629371|-0.58041958042)	Pig.19585	TUBB2B-205	Tubulin beta-2A chain [Fukomys damarensis]	MSTRG.16380			0.959538	0.0700513
Chr07_23444137_23455147	Pig.21160.1	Pig.19585	Pig.21160	circRNA	mRNA	1	0.0631579	0.623469	0.0302994	0.199692	ssc-miR-1842(-0.734265734266|-0.630473821505)	Pig.19585	TUBB2B-205	Tubulin beta-2A chain [Fukomys damarensis]	Pig.21160	SYNPO	LOW QUALITY PROTEIN: synaptopodin [Sus scrofa]	0.923947	0.318817
Chr07_23444137_23455147	Pig.12687.1	Pig.19585	Pig.12687	circRNA	mRNA	1	0.118964	0.762238	0.00395045	0.107434	Chr09_23263(-0.587412587413|-0.601398601399)	Pig.19585	TUBB2B-205	Tubulin beta-2A chain [Fukomys damarensis]	Pig.12687	ACCS-201	1-aminocyclopropane-1-carboxylate synthase-like protein 1 isoform X2 [Sus scrofa]	0.988235	0.129727
Chr07_23444137_23455147	Pig.19241.1	Pig.19585	Pig.19241	circRNA	mRNA	1	0.118964	0.664336	0.0184527	0.168318	Chr07_19592(-0.797202797203|-0.734265734266)	Pig.19585	TUBB2B-205	Tubulin beta-2A chain [Fukomys damarensis]	Pig.19241	TM7SF2-201	delta(14)-sterol reductase [Sus scrofa]	0.958904	0.471632
Chr07_23444137_23455147	Pig.22011.1	Pig.19585	Pig.22011	circRNA	mRNA	2	0.00367586	0.727273	0.00735503	0.127324	Chr08_21314(-0.749563321122|-0.577934336379);Chr08_21313(-0.749563321122|-0.577934336379)	Pig.19585	TUBB2B-205	Tubulin beta-2A chain [Fukomys damarensis]	Pig.22011	MMP23B-201	matrix metalloproteinase-23 isoform X1 [Sus scrofa]	0.983285	0.182884
Chr07_23444137_23455147	MSTRG.36474.1	Pig.19585	MSTRG.36474	circRNA	mRNA	1	0.168005	0.706294	0.0102452	0.139666	Chr09_23263(-0.587412587413|-0.601398601399)	Pig.19585	TUBB2B-205	Tubulin beta-2A chain [Fukomys damarensis]	MSTRG.36474			0.988235	0.160306
Chr07_23444137_23455147	MSTRG.30061.2	Pig.19585	MSTRG.30061	circRNA	mRNA	1	0.247952	0.795098	0.00199349	0.0924511	Chr07_19592(-0.797202797203|-0.637479086188)	Pig.19585	TUBB2B-205	Tubulin beta-2A chain [Fukomys damarensis]	MSTRG.30061			0.88867	0.1783
Chr07_23444137_23455147	Pig.23058.1	Pig.19585	Pig.23058	circRNA	mRNA	1	0.168005	0.65035	0.0220342	0.178309	ssc-miR-7137-3p(-0.629370629371|-0.587412587413)	Pig.19585	TUBB2B-205	Tubulin beta-2A chain [Fukomys damarensis]	Pig.23058	EBF4-201	transcription factor COE4 isoform X5 [Sus scrofa]	0.965517	0.204096
Chr07_23444137_23455147	Pig.12785.1	Pig.19585	Pig.12785	circRNA	mRNA	1	0.0631579	0.713287	0.00920178	0.1336	Chr09_23263(-0.587412587413|-0.601398601399)	Pig.19585	TUBB2B-205	Tubulin beta-2A chain [Fukomys damarensis]	Pig.12785	CRTAP-201	cartilage-associated protein [Sus scrofa]	0.988235	0.156484
Chr07_23444137_23455147	Pig.08625.1	Pig.19585	Pig.08625	circRNA	mRNA	1	0.21083	0.796496	0.00193124	0.0915734	Chr02_7024(-0.694060060506|-0.678640681154)	Pig.19585	TUBB2B-205	Tubulin beta-2A chain [Fukomys damarensis]	Pig.08625	CROCC-201	LOW QUALITY PROTEIN: rootletin [Sus scrofa]	0.988767	0.180943
Chr07_23444137_23455147	Pig.09711.1	Pig.19585	Pig.09711	circRNA	mRNA	1	0.0631579	0.676008	0.0158067	0.160844	Chr02_7024(-0.694060060506|-0.663186952253)	Pig.19585	TUBB2B-205	Tubulin beta-2A chain [Fukomys damarensis]	Pig.09711	NYNRIN-201	LOW QUALITY PROTEIN: protein NYNRIN [Sus scrofa]	0.977253	0.275662
Chr07_23444137_23455147	MSTRG.36875.1	Pig.19585	MSTRG.36875	circRNA	mRNA	1	0.0631579	0.72028	0.00823977	0.128514	Chr02_7024(-0.694060060506|-0.63711154272)	Pig.19585	TUBB2B-205	Tubulin beta-2A chain [Fukomys damarensis]	MSTRG.36875			0.957219	0.219126
Chr07_23444137_23455147	Pig.20961.1	Pig.19585	Pig.20961	circRNA	mRNA	1	0.0631579	0.72028	0.00823977	0.128514	Chr07_19592(-0.797202797203|-0.804195804196)	Pig.19585	TUBB2B-205	Tubulin beta-2A chain [Fukomys damarensis]	Pig.20961	FN3KRP-201	LOW QUALITY PROTEIN: ketosamine-3-kinase [Sus scrofa]	0.995633	0.499636
Chr07_23444137_23455147	Pig.08573.1	Pig.19585	Pig.08573	circRNA	mRNA	1	0.0631579	0.742558	0.00567053	0.119527	ssc-miR-1842(-0.734265734266|-0.812610703272)	Pig.19585	TUBB2B-205	Tubulin beta-2A chain [Fukomys damarensis]	Pig.08573	MIIP-201	migration and invasion-inhibitory protein [Sus scrofa]	0.949353	0.373829
Chr07_23444137_23455147	Pig.18835.1	Pig.19585	Pig.18835	circRNA	mRNA	2	0.0585557	0.844134	0.000554262	0.0742364	Chr09_23263(-0.587412587413|-0.658494880238);Chr07_19592(-0.797202797203|-0.66199751258)	Pig.19585	TUBB2B-205	Tubulin beta-2A chain [Fukomys damarensis]	Pig.18835	PIK3R6-203	phosphoinositide 3-kinase regulatory subunit 6 isoform X3 [Sus scrofa]	0.99408	0.119086
Chr07_23444137_23455147	Pig.07416.1	Pig.19585	Pig.07416	circRNA	mRNA	1	0.0631579	0.788092	0.00232868	0.0938036	ssc-miR-7137-3p(-0.629370629371|-0.658494880238)	Pig.19585	TUBB2B-205	Tubulin beta-2A chain [Fukomys damarensis]	Pig.07416	EMILIN3-201	EMILIN-3 [Sus scrofa]	0.977386	0.149189
Chr07_23444137_23455147	MSTRG.8524.2	Pig.19585	MSTRG.8524	circRNA	mRNA	1	0.168005	0.739055	0.00602782	0.119527	mir-361:ssc-miR-361-3p(-0.636363636364|-0.619965924479)	Pig.19585	TUBB2B-205	Tubulin beta-2A chain [Fukomys damarensis]	MSTRG.8524			0.986948	0.169821
Chr07_23444137_23455147	Pig.04912.1	Pig.19585	Pig.04912	circRNA	mRNA	1	0.118964	0.595447	0.0410748	0.221137	ssc-miR-7137-3p(-0.629370629371|-0.612960659796)	Pig.19585	TUBB2B-205	Tubulin beta-2A chain [Fukomys damarensis]	Pig.04912	MCM4-201	DNA replication licensing factor MCM4 [Sus scrofa]	0.986791	0.253969
Chr07_23444137_23455147	Pig.20300.1	Pig.19585	Pig.20300	circRNA	mRNA	1	0.279851	0.666693	0.017894	0.168245	Chr07_19592(-0.797202797203|-0.723132173505)	Pig.19585	TUBB2B-205	Tubulin beta-2A chain [Fukomys damarensis]	Pig.20300	CACNA1E-201	PREDICTED: voltage-dependent P/Q-type calcium channel subunit alpha-1A isoform X12 [Pan troglodytes]	0.95128	0.450357
Chr07_23444137_23455147	Pig.10482.1	Pig.19585	Pig.10482	circRNA	mRNA	1	0.0631579	0.775924	0.00301135	0.100207	ssc-miR-7137-3p(-0.629370629371|-0.644230107444)	Pig.19585	TUBB2B-205	Tubulin beta-2A chain [Fukomys damarensis]	Pig.10482	UBAP2L-204	PREDICTED: ubiquitin-associated protein 2-like isoform X4 [Pteropus vampyrus]	0.988333	0.152619
Chr07_23444137_23455147	Pig.12641.1	Pig.19585	Pig.12641	circRNA	mRNA	1	0.168005	0.734266	0.00654349	0.123576	Chr02_7024(-0.694060060506|-0.729652884121)	Pig.19585	TUBB2B-205	Tubulin beta-2A chain [Fukomys damarensis]	Pig.12641	MUTYH	adenine DNA glycosylase isoform X1 [Sus scrofa]	0.975	0.271445
Chr07_23444137_23455147	Pig.18905.1	Pig.19585	Pig.18905	circRNA	mRNA	1	0.0631579	0.835093	0.000723093	0.0790607	Chr09_23263(-0.587412587413|-0.666670770531)	Pig.19585	TUBB2B-205	Tubulin beta-2A chain [Fukomys damarensis]	Pig.18905	SVBP	PREDICTED: small vasohibin-binding protein [Felis catus]	0.9368	0.0998826
Chr07_23444137_23455147	Pig.17197.1	Pig.19585	Pig.17197	circRNA	mRNA	1	0.168005	0.923077	1.8622e-05	0.0331603	Chr09_23263(-0.587412587413|-0.72027972028)	Pig.19585	TUBB2B-205	Tubulin beta-2A chain [Fukomys damarensis]	Pig.17197	KPTN-201	kaptin isoform X1 [Sus scrofa]	0.898396	0.0324735
Chr07_23444137_23455147	MSTRG.9602.1	Pig.19585	MSTRG.9602	circRNA	mRNA	2	0.0442293	0.727273	0.00735503	0.127324	Chr08_21314(-0.749563321122|-0.626971189163);Chr08_21313(-0.749563321122|-0.626971189163)	Pig.19585	TUBB2B-205	Tubulin beta-2A chain [Fukomys damarensis]	MSTRG.9602			0.992069	0.228279
Chr07_23444137_23455147	Pig.09321.1	Pig.19585	Pig.09321	circRNA	mRNA	1	0.0631579	0.587413	0.0446093	0.225097	Chr07_19592(-0.797202797203|-0.65034965035)	Pig.19585	TUBB2B-205	Tubulin beta-2A chain [Fukomys damarensis]	Pig.09321	RP2-201	tubulin-specific chaperone C [Sus scrofa]	0.898551	0.437059
Chr03_86699258_86708558	Pig.08573.1	Pig.13189	Pig.08573	circRNA	mRNA	1	0.00526316	0.633976	0.0268409	0.192217	ssc-miR-1842(-0.643356643357|-0.812610703272)	Pig.13189	MRPS5-202	28S ribosomal protein S5, mitochondrial isoform X2 [Sus scrofa]	Pig.08573	MIIP-201	migration and invasion-inhibitory protein [Sus scrofa]	0.883751	0.384798
Chr14_18251903_18277779	Pig.05717.1	Pig.10687	Pig.05717	circRNA	mRNA	1	0.0210526	0.581024	0.0475691	0.23044	Chr05_13105(-0.578947368421|-0.772246730814)	Pig.10687	BICC1-201	protein bicaudal C homolog 1 isoform X1 [Sus scrofa]	Pig.05717	SLC5A1	sodium/glucose cotransporter 1-like isoform X1 [Sus scrofa]	0.856942	0.322475
Chr14_18251903_18277779	Pig.18322.1	Pig.10687	Pig.18322	circRNA	mRNA	1	0.00526316	0.710612	0.0095911	0.1354	Chr05_13105(-0.578947368421|-0.833880851384)	Pig.10687	BICC1-201	protein bicaudal C homolog 1 isoform X1 [Sus scrofa]	Pig.18322	SELENBP1-201	selenium-binding protein 1 isoform X1 [Sus scrofa]	0.819558	0.204345
Chr14_18251903_18277779	Pig.02298.1	Pig.10687	Pig.02298	circRNA	mRNA	1	0.00526316	0.768621	0.00348837	0.103583	Chr05_13105(-0.578947368421|-0.652602405431)	Pig.10687	BICC1-201	protein bicaudal C homolog 1 isoform X1 [Sus scrofa]	Pig.02298	GLDN-201	gliomedin [Sus scrofa]	0.940193	0.136059
Chr14_18251903_18277779	Pig.03534.1	Pig.10687	Pig.03534	circRNA	mRNA	1	0.00526316	0.652602	0.0214257	0.178309	Chr05_13105(-0.578947368421|-0.725113783812)	Pig.10687	BICC1-201	protein bicaudal C homolog 1 isoform X1 [Sus scrofa]	Pig.03534	C1QTNF9	complement C1q and tumor necrosis factor-related protein 9 [Sus scrofa]	0.887914	0.237987
Chr14_18251903_18277779	Pig.21030.1	Pig.10687	Pig.21030	circRNA	mRNA	1	0.00526316	0.877388	0.000177028	0.0630114	Chr05_13105(-0.578947368421|-0.717862645974)	Pig.10687	BICC1-201	protein bicaudal C homolog 1 isoform X1 [Sus scrofa]	Pig.21030	Gm42048	gag protein [Porcine endogenous retrovirus C]	0.892879	0.0638805
Chr14_18251903_18277779	Pig.19810.1	Pig.10687	Pig.19810	circRNA	mRNA	1	0.0157895	0.710612	0.0095911	0.1354	Chr05_13105(-0.578947368421|-0.739616059488)	Pig.10687	BICC1-201	protein bicaudal C homolog 1 isoform X1 [Sus scrofa]	Pig.19810	RNF213	PREDICTED: LOW QUALITY PROTEIN: E3 ubiquitin-protein ligase RNF213 [Balaenoptera acutorostrata scammoni]	0.878149	0.195978
Chr14_18251903_18277779	Pig.13475.1	Pig.10687	Pig.13475	circRNA	mRNA	1	0.00526316	0.733649	0.00661226	0.123576	Chr05_13105(-0.578947368421|-0.621059003408)	Pig.10687	BICC1-201	protein bicaudal C homolog 1 isoform X1 [Sus scrofa]	Pig.13475	NPR1-201	PREDICTED: protein O-mannose kinase [Tursiops truncatus]	0.964907	0.14827
Chr14_18251903_18277779	Pig.14701.1	Pig.10687	Pig.14701	circRNA	mRNA	1	0.00526316	0.846238	0.000519783	0.0742364	Chr05_13105(-0.578947368421|-0.65011439538)	Pig.10687	BICC1-201	protein bicaudal C homolog 1 isoform X1 [Sus scrofa]	Pig.14701	IFT122-201	LOW QUALITY PROTEIN: intraflagellar transport protein 122 homolog [Sus scrofa]	0.942096	0.0878477
Chr14_18251903_18277779	Pig.09642.1	Pig.10687	Pig.09642	circRNA	mRNA	1	0.0157895	0.768621	0.00348837	0.103583	Chr05_13105(-0.578947368421|-0.623597854078)	Pig.10687	BICC1-201	protein bicaudal C homolog 1 isoform X1 [Sus scrofa]	Pig.09642	FNDC1-201	LOW QUALITY PROTEIN: fibronectin type III domain-containing protein 1 [Sus scrofa]	0.96287	0.129171
Chr14_18251903_18277779	MSTRG.36474.1	Pig.10687	MSTRG.36474	circRNA	mRNA	1	0.0157895	0.681607	0.0146417	0.158152	Chr05_13105(-0.578947368421|-0.841131989222)	Pig.10687	BICC1-201	protein bicaudal C homolog 1 isoform X1 [Sus scrofa]	MSTRG.36474			0.815373	0.24023
Chr14_18251903_18277779	Pig.18835.1	Pig.10687	Pig.18835	circRNA	mRNA	1	0.0368421	0.657378	0.0201764	0.173534	Chr05_13105(-0.578947368421|-0.835342519204)	Pig.10687	BICC1-201	protein bicaudal C homolog 1 isoform X1 [Sus scrofa]	Pig.18835	PIK3R6-203	phosphoinositide 3-kinase regulatory subunit 6 isoform X3 [Sus scrofa]	0.818711	0.269723
Chr14_18251903_18277779	MSTRG.9602.1	Pig.10687	MSTRG.9602	circRNA	mRNA	1	0.0315789	0.725114	0.00762017	0.127324	Chr05_13105(-0.578947368421|-0.804876300031)	Pig.10687	BICC1-201	protein bicaudal C homolog 1 isoform X1 [Sus scrofa]	MSTRG.9602			0.836736	0.189574
Chr06_101714413_101778525	Pig.00276.1	Pig.08532	Pig.00276	circRNA	mRNA	2	0.00306321	0.769231	0.00344645	0.103583	Chr17_38858(-0.790374024355|-0.783122886517);Chr17_38857(-0.790374024355|-0.783122886517)	Pig.08532	RERE	arginine-glutamic acid dipeptide (RE) repeats, isoform CRA_c [Homo sapiens]	Pig.00276	SFT2D3-201	vesicle transport protein SFT2C [Sus scrofa]	0.999979	0.374789
Chr01_258858384_258867484	Pig.20594.1	Pig.14662	Pig.20594	circRNA	mRNA	1	0.0414369	0.650273	0.0220552	0.178309	Chr05_11955(-0.597959436743|-0.817595411794)	Pig.14662	AFDN-201	afadin isoform X5 [Sus scrofa]	Pig.20594	LRRC14-202	leucine-rich repeat-containing protein 14 [Sus scrofa]	0.844841	0.300589
Scaffold155_4251629_4267749	MSTRG.21578.1	MSTRG.43205,Pig.12793	MSTRG.21578	circRNA	mRNA	1	0.0263158	0.595447	0.0410748	0.221137	mir-31:ssc-miR-31(-0.583480690202|-0.59298610642)	MSTRG.43205,Pig.12793	LRRFIP2-202	leucine-rich repeat flightless-interacting protein 2 isoform X1 [Sus scrofa]	MSTRG.21578			0.99192	0.213985
Chr01_155784406_155807734	Pig.21160.1		Pig.21160	circRNA	mRNA	1	0.0105263	0.577934	0.0490488	0.233043	ssc-miR-1842(-0.657342657343|-0.630473821505)				Pig.21160	SYNPO	LOW QUALITY PROTEIN: synaptopodin [Sus scrofa]	0.979136	0.298426
Chr08_82115103_82175132	MSTRG.30891.2	Pig.01089	MSTRG.30891	circRNA	mRNA	2	0.0358465	0.756569	0.00439849	0.112606	mir-361:ssc-miR-361-3p(-0.693521203655|-0.811188811189);mir-423:ssc-miR-423-5p(-0.64098171853|-0.818181818182)	Pig.01089	ARHGAP10-201	rho GTPase-activating protein 10 isoform X1 [Sus scrofa]	MSTRG.30891			0.989569	0.263341
Chr08_82115103_82175132	MSTRG.21578.1	Pig.01089	MSTRG.21578	circRNA	mRNA	1	0.180804	0.763574	0.00385009	0.107434	mir-361:ssc-miR-361-3p(-0.693521203655|-0.776223776224)	Pig.01089	ARHGAP10-201	rho GTPase-activating protein 10 isoform X1 [Sus scrofa]	MSTRG.21578			0.94373	0.26766
Chr12_6014140_6048979	MSTRG.30891.2		MSTRG.30891	circRNA	mRNA	1	0.1503	0.629371	0.0283197	0.195771	Chr07_17502(-0.713286713287|-0.811188811189)				MSTRG.30891			0.93578	0.505522
Chr12_6014140_6048979	Pig.18656.1		Pig.18656	circRNA	mRNA	2	0.000991841	0.65035	0.0220342	0.178309	mir-504:ssc-miR-504(-0.755244755245|-0.748251748252);Chr07_17502(-0.713286713287|-0.685314685315)				Pig.18656	ARRB2-201	beta-arrestin-2 isoform X3 [Sus scrofa]	0.999789	0.394109
Chr12_6014140_6048979	MSTRG.17961.3		MSTRG.17961	circRNA	mRNA	1	0.0210526	0.713287	0.00920178	0.1336	Chr07_17502(-0.713286713287|-0.874125874126)				MSTRG.17961			0.898678	0.449536
Chr12_6014140_6048979	Pig.11482.1		Pig.11482	circRNA	mRNA	1	0.0210526	0.587413	0.0446093	0.225097	mir-504:ssc-miR-504(-0.755244755245|-0.664335664336)				Pig.11482	SMYD5-201	homeobox protein notochord [Sus scrofa]	0.935961	0.412527
Chr12_6014140_6048979	Pig.20549.1		Pig.20549	circRNA	mRNA	1	0.0414369	0.65035	0.0220342	0.178309	Chr07_17502(-0.713286713287|-0.72027972028)				Pig.20549	KIF24-201	uncharacterized protein LOC110257362 [Sus scrofa]	0.995122	0.369419
Chr12_6014140_6048979	Pig.09736.1		Pig.09736	circRNA	mRNA	1	0.0210526	0.622378	0.0306759	0.199692	Chr07_17502(-0.713286713287|-0.762237762238)				Pig.09736	FITM1-201	hypothetical protein PANDA_009946, partial [Ailuropoda melanoleuca]	0.966825	0.448941
Chr12_6014140_6048979	MSTRG.43551.1		MSTRG.43551	circRNA	mRNA	1	0.0414369	0.657343	0.0201855	0.173534	Chr07_17502(-0.713286713287|-0.608391608392)				MSTRG.43551			0.920635	0.255743
Chr12_6014140_6048979	Pig.23430.1		Pig.23430	circRNA	mRNA	1	0.0414369	0.664336	0.0184527	0.168318	Chr07_17502(-0.713286713287|-0.867132867133)				Pig.23430	TK1-201	thymidine kinase, cytosolic [Sus scrofa]	0.902655	0.533076
Chr13_9547397_9548320	Pig.00276.1	MSTRG.30786,Pig.15873	Pig.00276	circRNA	mRNA	2	5.56948e-05	0.577934	0.0490488	0.233043	Chr17_38858(-0.595635535432|-0.783122886517);Chr17_38857(-0.595635535432|-0.783122886517)	MSTRG.30786,Pig.15873	KLHDC8B-202	kelch domain-containing protein 8B isoform X1 [Sus scrofa]	Pig.00276	SFT2D3-201	vesicle transport protein SFT2C [Sus scrofa]	0.981509	0.354762
Chr08_114276995_114312296	MSTRG.30891.2	Pig.00676	MSTRG.30891	circRNA	mRNA	1	0.0810916	0.671329	0.0168315	0.162623	mir-25:ssc-miR-92a(-0.783216783217|-0.643356643357)	Pig.00676	EGF-201	pro-epidermal growth factor precursor [Sus scrofa]	MSTRG.30891			0.901961	0.319555
Chr02_86895228_86897561	MSTRG.30891.2	MSTRG.5373,Pig.20295	MSTRG.30891	circRNA	mRNA	1	0.0810916	0.839161	0.000642826	0.0767553	mir-361:ssc-miR-361-3p(-0.902097902098|-0.811188811189)	MSTRG.5373,Pig.20295	NFIX-203	PREDICTED: nuclear factor 1 X-type isoform X3 [Homo sapiens]	MSTRG.30891			0.946939	0.413609
Chr02_86895228_86897561	MSTRG.21578.1	MSTRG.5373,Pig.20295	MSTRG.21578	circRNA	mRNA	1	0.0515177	0.692308	0.012593	0.148606	mir-361:ssc-miR-361-3p(-0.902097902098|-0.776223776224)	MSTRG.5373,Pig.20295	NFIX-203	PREDICTED: nuclear factor 1 X-type isoform X3 [Homo sapiens]	MSTRG.21578			0.925	0.721427
Chr02_86895228_86897561	Pig.22014.1	MSTRG.5373,Pig.20295	Pig.22014	circRNA	mRNA	1	0.0105263	0.58494	0.0457391	0.227326	mir-361:ssc-miR-361-3p(-0.902097902098|-0.64098171853)	MSTRG.5373,Pig.20295	NFIX-203	PREDICTED: nuclear factor 1 X-type isoform X3 [Homo sapiens]	Pig.22014	RABL2B	rab-like protein 2A isoform X2 [Sus scrofa]	0.830782	0.564677
Chr06_97714092_97742948	Pig.07970.1		Pig.07970	circRNA	mRNA	1	0.0986861	0.591564	0.0427573	0.223159	mir-423:ssc-miR-423-5p(-0.661988246292|-0.594405594406)				Pig.07970	LLGL2-202	lethal(2) giant larvae protein homolog 2 [Sus scrofa]	0.946209	0.262937
Chr06_97714092_97742948	Pig.22620.1		Pig.22620	circRNA	mRNA	1	0.133704	0.612691	0.0341681	0.207077	mir-423:ssc-miR-423-5p(-0.661988246292|-0.643356643357)				Pig.22620	RGS12-201	LOW QUALITY PROTEIN: regulator of G-protein signaling 12 [Sus scrofa]	0.985727	0.28715
Chr06_97714092_97742948	Pig.19958.1		Pig.19958	circRNA	mRNA	1	0.0210526	0.627875	0.0288123	0.198294	mir-423:ssc-miR-423-5p(-0.661988246292|-0.609458027454)				Pig.19958	RCE1-202	CAAX prenyl protease 2 isoform X1 [Sus scrofa]	0.958685	0.250207
Chr06_97714092_97742948	Pig.07964.1		Pig.07964	circRNA	mRNA	1	0.0414369	0.59011	0.0433998	0.225097	ssc-miR-9858-5p(-0.677258157147|-0.618630129371)				Pig.07964	MYO16	LOW QUALITY PROTEIN: unconventional myosin-XVI [Sus scrofa]	0.954758	0.294056
Chr06_101761329_101778525	Pig.08781.1	Pig.08532	Pig.08781	circRNA	mRNA	1	0.0157895	0.664336	0.0184527	0.168318	Chr03_7531(-0.629370629371|-0.769230769231)	Pig.08532	RERE	arginine-glutamic acid dipeptide (RE) repeats, isoform CRA_c [Homo sapiens]	Pig.08781	SEMA4B-201	semaphorin-4B [Sus scrofa]	0.9	0.301421
Chr06_101761329_101778525	Pig.21160.1	Pig.08532	Pig.21160	circRNA	mRNA	1	0.0157895	0.676008	0.0158067	0.160844	ssc-miR-1842(-0.699300699301|-0.630473821505)	Pig.08532	RERE	arginine-glutamic acid dipeptide (RE) repeats, isoform CRA_c [Homo sapiens]	Pig.21160	SYNPO	LOW QUALITY PROTEIN: synaptopodin [Sus scrofa]	0.948242	0.252264
Chr06_101761329_101778525	Pig.08573.1	Pig.08532	Pig.08573	circRNA	mRNA	1	0.0157895	0.749563	0.00500405	0.118841	ssc-miR-1842(-0.699300699301|-0.812610703272)	Pig.08532	RERE	arginine-glutamic acid dipeptide (RE) repeats, isoform CRA_c [Homo sapiens]	Pig.08573	MIIP-201	migration and invasion-inhibitory protein [Sus scrofa]	0.925055	0.314371
Chr15_60901926_60907343	Pig.11423.1		Pig.11423	circRNA	mRNA	1	0.00526316	0.726094	0.00749897	0.127324	Chr02_7181(-0.705973207237|-0.616463292138)				Pig.11423	MICB	MHC class I polypeptide-related sequence B isoform X1 [Sus scrofa]	0.932314	0.204469
Chr15_60901926_60907343	Pig.09185.1		Pig.09185	circRNA	mRNA	1	0.00526316	0.669145	0.017326	0.164599	Chr02_7181(-0.705973207237|-0.612960659796)				Pig.09185	ORAI2-201	PREDICTED: protein orai-2 [Lipotes vexillifer]	0.929479	0.246672
Chr15_60901926_60907343	Pig.15118.1		Pig.15118	circRNA	mRNA	1	0.00526316	0.665586	0.0181548	0.168318	Chr02_7181(-0.705973207237|-0.577934336379)				Pig.15118	Gatd3a	ES1 protein homolog, mitochondrial [Sus scrofa]	0.900274	0.219932
Chr15_60901926_60907343	Pig.10307.1		Pig.10307	circRNA	mRNA	1	0.00526316	0.626434	0.0292927	0.198294	Chr02_7181(-0.705973207237|-0.66199751258)				Pig.10307	CCNF-201	Cyclin-F [Fukomys damarensis]	0.967853	0.326749
Chr15_60901926_60907343	Pig.17713.1		Pig.17713	circRNA	mRNA	1	0.0263158	0.61792	0.0322494	0.204711	Chr02_7181(-0.705973207237|-0.701231311418)				Pig.17713	FBN3-203	fibrillin-3 [Sus scrofa]	0.99663	0.374579
Chr15_60901926_60907343	Pig.12641.1		Pig.12641	circRNA	mRNA	1	0.0157895	0.629993	0.0281165	0.195771	Chr02_7181(-0.705973207237|-0.707531733022)				Pig.12641	MUTYH	adenine DNA glycosylase isoform X1 [Sus scrofa]	0.998897	0.369264
Chr13_117174774_117178569	Pig.05717.1		Pig.05717	circRNA	mRNA	1	0.0210526	0.58299	0.0466436	0.23038	Chr05_13105(-0.630826494625|-0.772246730814)				Pig.05717	SLC5A1	sodium/glucose cotransporter 1-like isoform X1 [Sus scrofa]	0.899207	0.38858
Chr13_117174774_117178569	Pig.21030.1		Pig.21030	circRNA	mRNA	1	0.00526316	0.600905	0.0387904	0.217271	Chr05_13105(-0.630826494625|-0.717862645974)				Pig.21030	Gm42048	gag protein [Porcine endogenous retrovirus C]	0.935466	0.326818
Chr13_117174774_117178569	Pig.19810.1		Pig.19810	circRNA	mRNA	1	0.0157895	0.589708	0.0435783	0.225097	Chr05_13105(-0.630826494625|-0.739616059488)				Pig.19810	RNF213	PREDICTED: LOW QUALITY PROTEIN: E3 ubiquitin-protein ligase RNF213 [Balaenoptera acutorostrata scammoni]	0.920617	0.353909
Chr13_117174774_117178569	Pig.18835.1		Pig.18835	circRNA	mRNA	1	0.0368421	0.719733	0.00831214	0.129454	Chr05_13105(-0.630826494625|-0.835342519204)				Pig.18835	PIK3R6-203	phosphoinositide 3-kinase regulatory subunit 6 isoform X3 [Sus scrofa]	0.86051	0.267787
Chr13_117174774_117178569	Pig.14580.1		Pig.14580	circRNA	mRNA	1	0.00526316	0.691691	0.0127049	0.149599	Chr05_13105(-0.630826494625|-0.791759431245)				Pig.14580	TMEM173-202	stimulator of interferon genes protein isoform X3 [Sus scrofa]	0.886873	0.286112
Chr13_117174774_117178569	Pig.09740.1		Pig.09740	circRNA	mRNA	1	0.0157895	0.672808	0.0165024	0.162623	Chr05_13105(-0.630826494625|-0.666671342519)				Pig.09740	CARMIL3-201	LOW QUALITY PROTEIN: capping protein, Arp2/3 and myosin-I linker protein 3 [Sus scrofa]	0.972374	0.236636
Chr07_97382711_97392874	MSTRG.18963.2	Pig.08771	MSTRG.18963	circRNA	mRNA	1	0.103602	0.605955	0.0367585	0.213363	ssc-miR-1842(-0.819615967956|-0.671328671329)	Pig.08771	ETFA-201	electron transfer flavoprotein subunit alpha, mitochondrial [Sus scrofa]	MSTRG.18963			0.900541	0.474724
Chr07_97382711_97392874	Pig.21160.1	Pig.08771	Pig.21160	circRNA	mRNA	1	0.0157895	0.578947	0.0485601	0.23291	ssc-miR-1842(-0.819615967956|-0.630473821505)	Pig.08771	ETFA-201	electron transfer flavoprotein subunit alpha, mitochondrial [Sus scrofa]	Pig.21160	SYNPO	LOW QUALITY PROTEIN: synaptopodin [Sus scrofa]	0.869565	0.439076
Chr07_97382711_97392874	Pig.08573.1	Pig.08771	Pig.08573	circRNA	mRNA	1	0.0157895	0.74386	0.00554191	0.119527	ssc-miR-1842(-0.819615967956|-0.812610703272)	Pig.08771	ETFA-201	electron transfer flavoprotein subunit alpha, mitochondrial [Sus scrofa]	Pig.08573	MIIP-201	migration and invasion-inhibitory protein [Sus scrofa]	0.995708	0.510762
Chr09_133416931_133422582	Pig.22620.1	Pig.10251	Pig.22620	circRNA	mRNA	1	0.0368421	0.626971	0.0291129	0.198294	Chr12_28094(-0.691228070175|-0.72504489473)	Pig.10251	EMSY-205	BRCA2-interacting transcriptional repressor EMSY isoform X1 [Sus scrofa]	Pig.22620	RGS12-201	LOW QUALITY PROTEIN: regulator of G-protein signaling 12 [Sus scrofa]	0.976123	0.374199
Chr09_133416931_133422582	MSTRG.18963.2	Pig.10251	MSTRG.18963	circRNA	mRNA	1	0.0368421	0.788092	0.00232868	0.0938036	Chr12_28094(-0.691228070175|-0.774081747514)	Pig.10251	EMSY-205	BRCA2-interacting transcriptional repressor EMSY isoform X1 [Sus scrofa]	MSTRG.18963			0.943457	0.235021
Chr09_133416931_133422582	Pig.21446.1	Pig.10251	Pig.21446	circRNA	mRNA	1	0.00526316	0.661998	0.0190195	0.170274	Chr12_28094(-0.691228070175|-0.86865282074)	Pig.10251	EMSY-205	BRCA2-interacting transcriptional repressor EMSY isoform X1 [Sus scrofa]	Pig.21446	CYBA-201	cytochrome b-245 light chain isoform X1 [Sus scrofa]	0.886258	0.490046
Chr09_133416931_133422582	MSTRG.12911.1	Pig.10251	MSTRG.12911	circRNA	mRNA	1	0.00526316	0.609458	0.0353946	0.209995	Chr12_28094(-0.691228070175|-0.633976453846)	Pig.10251	EMSY-205	BRCA2-interacting transcriptional repressor EMSY isoform X1 [Sus scrofa]	MSTRG.12911			0.956798	0.303052
Chr15_78603808_78637426	MSTRG.18963.2	Pig.00183	MSTRG.18963	circRNA	mRNA	2	0.00116959	0.678322	0.0153173	0.159036	Chr03_9544(-0.594405594406|-0.874125874126);Chr12_28094(-0.756568585805|-0.774081747514)	Pig.00183	TLK1-201	serine/threonine-protein kinase tousled-like 1 isoform X1 [Sus scrofa]	MSTRG.18963			0.981794	0.363186
Chr15_78603808_78637426	Pig.21446.1	Pig.00183	Pig.21446	circRNA	mRNA	1	0.0105263	0.594406	0.0415215	0.221137	Chr12_28094(-0.756568585805|-0.86865282074)	Pig.00183	TLK1-201	serine/threonine-protein kinase tousled-like 1 isoform X1 [Sus scrofa]	Pig.21446	CYBA-201	cytochrome b-245 light chain isoform X1 [Sus scrofa]	0.931034	0.788223
Chr15_78603808_78637426	Pig.12641.1	Pig.00183	Pig.12641	circRNA	mRNA	1	0.0312448	0.685315	0.013906	0.152823	Chr03_9544(-0.594405594406|-0.839160839161)	Pig.00183	TLK1-201	serine/threonine-protein kinase tousled-like 1 isoform X1 [Sus scrofa]	Pig.12641	MUTYH	adenine DNA glycosylase isoform X1 [Sus scrofa]	0.829268	0.258875
Chr06_2663266_2692570	MSTRG.30891.2	Pig.12657	MSTRG.30891	circRNA	mRNA	1	0.117108	0.755245	0.00450844	0.112606	mir-874:ssc-miR-874(-0.727272727273|-0.783216783217)	Pig.12657	ERI3-203	ERI1 exoribonuclease 3 isoform X1 [Sus scrofa]	MSTRG.30891			0.962963	0.32024
Chr06_2663266_2692570	MSTRG.21578.1	Pig.12657	MSTRG.21578	circRNA	mRNA	1	0.0756323	0.692308	0.012593	0.148606	mir-874:ssc-miR-874(-0.727272727273|-0.657342657343)	Pig.12657	ERI3-203	ERI1 exoribonuclease 3 isoform X1 [Sus scrofa]	MSTRG.21578			0.949495	0.278098
Chr13_95730082_95739739	Pig.08573.1	Pig.13039	Pig.08573	circRNA	mRNA	1	0.00526316	0.619966	0.0315202	0.201756	ssc-miR-1842(-0.902097902098|-0.812610703272)	Pig.13039	USP13-201	ubiquitin carboxyl-terminal hydrolase 13 isoform X1 [Sus scrofa]	Pig.08573	MIIP-201	migration and invasion-inhibitory protein [Sus scrofa]	0.947812	1.06962
Chr04_59194539_59206911	MSTRG.30891.2	Pig.14064	MSTRG.30891	circRNA	mRNA	1	0.117108	0.685315	0.013906	0.152823	mir-423:ssc-miR-423-5p(-0.678321678322|-0.818181818182)	Pig.14064	CHD7-201	chromodomain-helicase-DNA-binding protein 7 isoform X1 [Sus scrofa]	MSTRG.30891			0.906542	0.376826
Chr04_59194539_59206911	Pig.11856.1	Pig.14064	Pig.11856	circRNA	mRNA	1	0.0312448	0.676008	0.0158067	0.160844	mir-423:ssc-miR-423-5p(-0.678321678322|-0.644484350871)	Pig.14064	CHD7-201	chromodomain-helicase-DNA-binding protein 7 isoform X1 [Sus scrofa]	Pig.11856	TP53I13-201	LOW QUALITY PROTEIN: tumor protein p53-inducible protein 13 [Sus scrofa]	0.97442	0.250885
Chr07_93837959_93875306	Pig.02564.1	Pig.08468	Pig.02564	circRNA	mRNA	1	0.00526316	0.594593	0.0414408	0.221137	mir-361:ssc-miR-361-3p(-0.587342164888|-0.594405594406)	Pig.08468	NEO1-201	neogenin isoform X1 [Sus scrofa]	Pig.02564	MXD3-201	max dimerization protein 3 [Sus scrofa]	0.994023	0.21743
Chr12_47059189_47062026	MSTRG.18963.2		MSTRG.18963	circRNA	mRNA	1	0.0368421	0.601399	0.0385885	0.216593	Chr12_28094(-0.819615967956|-0.774081747514)				MSTRG.18963			0.971429	0.692523
Chr12_47059189_47062026	Pig.21446.1		Pig.21446	circRNA	mRNA	1	0.00526316	0.594406	0.0415215	0.221137	Chr12_28094(-0.819615967956|-0.86865282074)				Pig.21446	CYBA-201	cytochrome b-245 light chain isoform X1 [Sus scrofa]	0.970954	1.00858
Chr03_105294932_105321005	Pig.20592.1	Pig.16535	Pig.20592	circRNA	mRNA	1	0.0312448	0.661998	0.0190195	0.170274	mir-361:ssc-miR-361-3p(-0.669002777263|-0.643356643357)	Pig.16535	CLEC16A-201	protein CLEC16A isoform X1 [Sus scrofa]	Pig.20592	MFSD3-201	major facilitator superfamily domain-containing protein 3 isoform X2 [Sus scrofa]	0.980458	0.254996
Chr03_105294932_105321005	Pig.07672.1	Pig.16535	Pig.07672	circRNA	mRNA	1	0.0756323	0.626316	0.0293323	0.198294	ssc-miR-7137-3p(-0.770579115172|-0.872155453081)	Pig.16535	CLEC16A-201	protein CLEC16A isoform X1 [Sus scrofa]	Pig.07672	ESPL1-201	LOW QUALITY PROTEIN: separin [Sus scrofa]	0.938166	0.773038
Chr03_105294932_105321005	Pig.02564.1	Pig.16535	Pig.02564	circRNA	mRNA	1	0.0157895	0.602453	0.0381595	0.216593	mir-361:ssc-miR-361-3p(-0.669002777263|-0.594405594406)	Pig.16535	CLEC16A-201	protein CLEC16A isoform X1 [Sus scrofa]	Pig.02564	MXD3-201	max dimerization protein 3 [Sus scrofa]	0.940956	0.259819
Chr11_6994653_6999362	Pig.22620.1	Pig.03552	Pig.22620	circRNA	mRNA	1	0.071345	0.595447	0.0410748	0.221137	Chr12_28094(-0.926315789474|-0.72504489473)	Pig.03552	PARP4-202	poly [ADP-ribose]	Pig.22620	RGS12-201	LOW QUALITY PROTEIN: regulator of G-protein signaling 12 [Sus scrofa]	0.878118	0.889023
Chr11_6994653_6999362	MSTRG.18963.2	Pig.03552	MSTRG.18963	circRNA	mRNA	2	0.00116959	0.721542	0.00807444	0.128514	Chr03_9544(-0.70402910068|-0.874125874126);Chr12_28094(-0.926315789474|-0.774081747514)	Pig.03552	PARP4-202	poly [ADP-ribose]	MSTRG.18963			0.990184	0.558267
Chr11_6994653_6999362	Pig.21446.1	Pig.03552	Pig.21446	circRNA	mRNA	1	0.0105263	0.728548	0.00720175	0.127324	Chr12_28094(-0.926315789474|-0.86865282074)	Pig.03552	PARP4-202	poly [ADP-ribose]	Pig.21446	CYBA-201	cytochrome b-245 light chain isoform X1 [Sus scrofa]	0.967875	1.13626
Chr11_6994653_6999362	Pig.19812.1	Pig.03552	Pig.19812	circRNA	mRNA	1	0.0209412	0.591945	0.0425902	0.223159	Chr03_9544(-0.70402910068|-0.818181818182)	Pig.03552	PARP4-202	poly [ADP-ribose]	Pig.19812	SGSH-201	N-sulphoglucosamine sulphohydrolase [Sus scrofa]	0.925009	0.552953
Chr11_6994653_6999362	Pig.01857.1	Pig.03552	Pig.01857	circRNA	mRNA	1	0.0105263	0.693521	0.0123749	0.148606	Chr03_9544(-0.70402910068|-0.832167832168)	Pig.03552	PARP4-202	poly [ADP-ribose]	Pig.01857	SRPX-204	sushi repeat-containing protein SRPX isoform X1 [Sus scrofa]	0.916587	0.420162
Chr11_6994653_6999362	Pig.12641.1	Pig.03552	Pig.12641	circRNA	mRNA	1	0.0312448	0.749563	0.00500405	0.118841	Chr03_9544(-0.70402910068|-0.839160839161)	Pig.03552	PARP4-202	poly [ADP-ribose]	Pig.12641	MUTYH	adenine DNA glycosylase isoform X1 [Sus scrofa]	0.912434	0.338509
Chr03_77822466_77838469	Pig.21446.1	MSTRG.8700,Pig.09456	Pig.21446	circRNA	mRNA	1	0.0315789	0.581437	0.0473736	0.23044	Chr12_28094(-0.60701754386|-0.86865282074)	MSTRG.8700,Pig.09456	REV1-202	DNA repair protein REV1 isoform X1 [Sus scrofa]	Pig.21446	CYBA-201	cytochrome b-245 light chain isoform X1 [Sus scrofa]	0.822701	0.443899
Chr03_77822466_77838469	Pig.09067.1	MSTRG.8700,Pig.09456	Pig.09067	circRNA	mRNA	1	0.0315789	0.732866	0.00670028	0.123576	mir-331:ssc-miR-331-3p(-0.605955395113|-0.75088181523)	MSTRG.8700,Pig.09456	REV1-202	DNA repair protein REV1 isoform X1 [Sus scrofa]	Pig.09067	PMS2-201	mismatch repair endonuclease PMS2 isoform X1 [Sus scrofa]	0.893188	0.203978
Chr03_77822466_77838469	Pig.10307.1	MSTRG.8700,Pig.09456	Pig.10307	circRNA	mRNA	1	0.0315789	0.683013	0.0143594	0.155729	Chr02_7181(-0.768421052632|-0.66199751258)	MSTRG.8700,Pig.09456	REV1-202	DNA repair protein REV1 isoform X1 [Sus scrofa]	Pig.10307	CCNF-201	Cyclin-F [Fukomys damarensis]	0.9256	0.319575
Chr03_77822466_77838469	Pig.11328.1	MSTRG.8700,Pig.09456	Pig.11328	circRNA	mRNA	1	0.0315789	0.71804	0.00853932	0.130155	Chr02_7181(-0.768421052632|-0.679510674288)	MSTRG.8700,Pig.09456	REV1-202	DNA repair protein REV1 isoform X1 [Sus scrofa]	Pig.11328	HIST2H2BE-201	PREDICTED: histone H2B type 1-like [Propithecus coquereli]	0.938595	0.300815
Chr02_37935438_37968636	Pig.14132.1		Pig.14132	circRNA	mRNA	1	0.0105263	0.637479	0.0257544	0.189707	ChrX_42092(-0.612960659796|-0.769230769231)				Pig.14132	MYH3-201	LOW QUALITY PROTEIN: myosin-3 [Sus scrofa]	0.88694	0.308732
Chr02_37935438_37968636	Pig.11889.1		Pig.11889	circRNA	mRNA	1	0.0157895	0.588442	0.0441448	0.225097	ChrX_42092(-0.612960659796|-0.776223776224)				Pig.11889	E2F1-201	transcription factor E2F1 [Sus scrofa]	0.882476	0.362303
Chr02_37935438_37968636	Pig.12139.1		Pig.12139	circRNA	mRNA	1	0.0157895	0.666676	0.0178979	0.168245	ChrX_42092(-0.612960659796|-0.647903389988)				Pig.12139	KIF14-201	LOW QUALITY PROTEIN: kinesin-like protein KIF14 [Sus scrofa]	0.972287	0.218827
Chr02_37935438_37968636	Pig.20469.1		Pig.20469	circRNA	mRNA	1	0.0105263	0.690019	0.0130122	0.149599	ChrX_42092(-0.612960659796|-0.643356643357)				Pig.20469	POLD1-201	DNA polymerase delta catalytic subunit isoform X2 [Sus scrofa]	0.975805	0.201221
Chr04_112634411_112648116	MSTRG.30891.2	Pig.01723	MSTRG.30891	circRNA	mRNA	1	0.0421053	0.725114	0.00762017	0.127324	mir-361:ssc-miR-361-3p(-0.688858094621|-0.811188811189)	Pig.01723	RPAP2-201	putative RNA polymerase II subunit B1 CTD phosphatase RPAP2 [Sus scrofa]	MSTRG.30891			0.918449	0.332765
Chr04_112634411_112648116	MSTRG.21578.1	Pig.01723	MSTRG.21578	circRNA	mRNA	1	0.0263158	0.717863	0.00856333	0.130335	mir-361:ssc-miR-361-3p(-0.688858094621|-0.776223776224)	Pig.01723	RPAP2-201	putative RNA polymerase II subunit B1 CTD phosphatase RPAP2 [Sus scrofa]	MSTRG.21578			0.940368	0.317101
Chr13_897802_909038	Pig.15991.1		Pig.15991	circRNA	mRNA	2	0.00664826	0.652482	0.0214579	0.178309	ChrX_42092(-0.577479108467|-0.676073102596);Chr07_20261(-0.61973367738|-0.711285243356)				Pig.15991	CD22-201	B-cell receptor CD22 [Sus scrofa]	0.994541	0.242803
Chr13_897802_909038	Pig.12664.1		Pig.12664	circRNA	mRNA	2	0.00341545	0.63493	0.0265421	0.192217	ChrX_42092(-0.577479108467|-0.893171247131);Chr07_20261(-0.61973367738|-0.93170020289)				Pig.12664	CCDC24-202	coiled-coil domain-containing protein 24 isoform X2 [Sus scrofa]	0.956743	0.371783
Chr13_897802_909038	MSTRG.30891.2		MSTRG.30891	circRNA	mRNA	2	0.0277962	0.654946	0.0208059	0.174251	mir-874:ssc-miR-874(-0.65494581814|-0.783216783217);mir-423:ssc-miR-423-5p(-0.746497384116|-0.818181818182)				MSTRG.30891			0.994973	0.446116
Chr13_897802_909038	Pig.16362.1		Pig.16362	circRNA	mRNA	1	0.071345	0.605649	0.0368796	0.213603	mir-423:ssc-miR-423-5p(-0.746497384116|-0.748251748252)				Pig.16362	Hps6	Hermansky-Pudlak syndrome 6 protein [Sus scrofa]	0.998826	0.498993
Chr13_897802_909038	MSTRG.21578.1		MSTRG.21578	circRNA	mRNA	1	0.161739	0.605649	0.0368796	0.213603	mir-874:ssc-miR-874(-0.65494581814|-0.657342657343)				MSTRG.21578			0.998174	0.298127
Chr13_897802_909038	Pig.11856.1		Pig.11856	circRNA	mRNA	1	0.071345	0.599656	0.0393052	0.218821	mir-423:ssc-miR-423-5p(-0.746497384116|-0.644484350871)				Pig.11856	TP53I13-201	LOW QUALITY PROTEIN: tumor protein p53-inducible protein 13 [Sus scrofa]	0.926661	0.366642
Chr13_897802_909038	Pig.02211.1		Pig.02211	circRNA	mRNA	1	0.0368421	0.592601	0.0423034	0.223159	mir-423:ssc-miR-423-5p(-0.746497384116|-0.637479086188)				Pig.02211	SPG21-201	maspardin isoform X1 [Sus scrofa]	0.921228	0.364917
Chr13_897802_909038	Pig.12620.1		Pig.12620	circRNA	mRNA	1	0.071345	0.70195	0.0109362	0.143604	mir-423:ssc-miR-423-5p(-0.746497384116|-0.917689673523)				Pig.12620	FAAH-201	fatty-acid amide hydrolase 1 [Sus scrofa]	0.897132	0.638033
Chr13_897802_909038	Pig.22659.1		Pig.22659	circRNA	mRNA	2	0.00341545	0.577479	0.0492696	0.233079	Chr07_20261(-0.61973367738|-0.79020979021);ChrX_42092(-0.577479108467|-0.741258741259)				Pig.22659	GALK1-202	galactokinase [Sus scrofa]	0.984978	0.349913
Chr05_32183948_32242667	Pig.12664.1		Pig.12664	circRNA	mRNA	2	0.00164418	0.581437	0.0473736	0.23044	ChrX_42092(-0.601398601399|-0.893171247131);Chr07_20261(-0.664335664336|-0.93170020289)				Pig.12664	CCDC24-202	coiled-coil domain-containing protein 24 isoform X2 [Sus scrofa]	0.966913	0.588919
Chr05_32183948_32242667	MSTRG.21578.1		MSTRG.21578	circRNA	mRNA	1	0.120705	0.664336	0.0184527	0.168318	mir-31:ssc-miR-31(-0.628074041711|-0.59298610642)				MSTRG.21578			0.971264	0.198478
Chr05_32183948_32242667	MSTRG.34668.1		MSTRG.34668	circRNA	mRNA	1	0.0263158	0.721849	0.00803466	0.128514	Chr12_28849(-0.587412587413|-0.721848885584)				MSTRG.34668			0.897319	0.190082
Chr05_32183948_32242667	Pig.18243.1		Pig.18243	circRNA	mRNA	1	0.0756323	0.576821	0.0495901	0.233872	Chr07_20261(-0.664335664336|-0.655992204061)				Pig.18243	DHX57-203	putative ATP-dependent RNA helicase TDRD9 isoform X2 [Sus scrofa]	0.993681	0.326844
Chr05_11194767_11212141	MSTRG.30891.2	Pig.07621	MSTRG.30891	circRNA	mRNA	1	0.1503	0.605955	0.0367585	0.213363	mir-361:ssc-miR-361-3p(-0.654992247896|-0.811188811189)	Pig.07621	LARP4-202	la-related protein 4 isoform X1 [Sus scrofa]	MSTRG.30891			0.893467	0.437058
Chr05_11194767_11212141	MSTRG.21578.1	Pig.07621	MSTRG.21578	circRNA	mRNA	1	0.0986861	0.697024	0.011761	0.145686	mir-361:ssc-miR-361-3p(-0.654992247896|-0.776223776224)	Pig.07621	LARP4-202	la-related protein 4 isoform X1 [Sus scrofa]	MSTRG.21578			0.915295	0.301128
Chr08_132361007_132370536	Pig.20803.1	Pig.00590,MSTRG.23440	Pig.20803	circRNA	mRNA	1	0.0105263	0.619567	0.0316615	0.201944	Chr02_6753(-0.638980355282|-0.577479108467)	Pig.00590,MSTRG.23440	FAM13A-201	LOW QUALITY PROTEIN: protein FAM13A [Sus scrofa]	Pig.20803	PNPLA2-201	patatin-like phospholipase domain-containing 2 [Sus scrofa]	0.949442	0.22057
Chr08_132361007_132370536	MSTRG.9483.1	Pig.00590,MSTRG.23440	MSTRG.9483	circRNA	mRNA	1	0.0209412	0.600905	0.0387904	0.217271	Chr02_7222(-0.835855643479|-0.697619342867)	Pig.00590,MSTRG.23440	FAM13A-201	LOW QUALITY PROTEIN: protein FAM13A [Sus scrofa]	MSTRG.9483			0.909854	0.555657
Chr08_132361007_132370536	Pig.10835.1	Pig.00590,MSTRG.23440	Pig.10835	circRNA	mRNA	1	0.0515177	0.577656	0.0491838	0.233079	Chr02_7222(-0.835855643479|-0.661404191629)	Pig.00590,MSTRG.23440	FAM13A-201	LOW QUALITY PROTEIN: protein FAM13A [Sus scrofa]	Pig.10835	DISP1-201	protein dispatched homolog 1 isoform X3 [Sus scrofa]	0.883486	0.51738
Chr08_132361007_132370536	Pig.00949.1	Pig.00590,MSTRG.23440	Pig.00949	circRNA	mRNA	1	0.0105263	0.635222	0.0264509	0.19215	Chr02_7222(-0.835855643479|-0.591432041227)	Pig.00590,MSTRG.23440	FAM13A-201	LOW QUALITY PROTEIN: protein FAM13A [Sus scrofa]	Pig.00949	EPHA3-201	PREDICTED: ephrin type-A receptor 3-like [Physeter catodon]	0.82875	0.316978
Chr04_36821977_36840228	MSTRG.21578.1	Pig.01495	MSTRG.21578	circRNA	mRNA	1	0.0263158	0.605078	0.0371059	0.214334	mir-361:ssc-miR-361-3p(-0.679822931059|-0.776223776224)	Pig.01495	WWP1-201	NEDD4-like E3 ubiquitin-protein ligase WWP1 isoform X1 [Sus scrofa]	MSTRG.21578			0.933793	0.437713
Chr03_105249966_105263420	Pig.20594.1	Pig.16535	Pig.20594	circRNA	mRNA	1	0.116503	0.815806	0.00121458	0.0861869	mir-423:ssc-miR-423-5p(-0.786601401906|-0.899836760121)	Pig.16535	CLEC16A-201	protein CLEC16A isoform X1 [Sus scrofa]	Pig.20594	LRRC14-202	leucine-rich repeat-containing protein 14 [Sus scrofa]	0.932855	0.41487
Chr03_105249966_105263420	MSTRG.30891.2	Pig.16535	MSTRG.30891	circRNA	mRNA	1	0.208755	0.626434	0.0292927	0.198294	mir-423:ssc-miR-423-5p(-0.786601401906|-0.818181818182)	Pig.16535	CLEC16A-201	protein CLEC16A isoform X1 [Sus scrofa]	MSTRG.30891			0.980321	0.674739
Chr03_105249966_105263420	Pig.16786.1	Pig.16535	Pig.16786	circRNA	mRNA	1	0.116503	0.714887	0.0089746	0.1336	mir-423:ssc-miR-423-5p(-0.786601401906|-0.658494880238)	Pig.16535	CLEC16A-201	protein CLEC16A isoform X1 [Sus scrofa]	Pig.16786	TTYH1-201	protein tweety homolog 1 isoform X1 [Sus scrofa]	0.911351	0.291135
Chr03_105249966_105263420	Pig.12620.1	Pig.16535	Pig.12620	circRNA	mRNA	1	0.0614871	0.784415	0.00252102	0.0962432	mir-423:ssc-miR-423-5p(-0.786601401906|-0.917689673523)	Pig.16535	CLEC16A-201	protein CLEC16A isoform X1 [Sus scrofa]	Pig.12620	FAAH-201	fatty-acid amide hydrolase 1 [Sus scrofa]	0.923083	0.529402
Chr06_97707621_97742948	MSTRG.30891.2		MSTRG.30891	circRNA	mRNA	1	0.117108	0.816113	0.00120515	0.0860882	mir-874:ssc-miR-874(-0.64098171853|-0.783216783217)				MSTRG.30891			0.90013	0.157966
Chr06_97707621_97742948	MSTRG.21578.1		MSTRG.21578	circRNA	mRNA	1	0.0756323	0.59895	0.0395981	0.218821	mir-874:ssc-miR-874(-0.64098171853|-0.657342657343)				MSTRG.21578			0.987398	0.291899
Chr09_109379675_109381891	MSTRG.21578.1		MSTRG.21578	circRNA	mRNA	1	0.0263158	0.576604	0.049696	0.234063	mir-361:ssc-miR-361-3p(-0.633552260359|-0.776223776224)				MSTRG.21578			0.898798	0.402705
Chr15_121752211_121761784	MSTRG.30891.2	Pig.14206	MSTRG.30891	circRNA	mRNA	1	0.278556	0.683116	0.014339	0.155729	mir-361:ssc-miR-361-3p(-0.633818533684|-0.811188811189)	Pig.14206	TNS1-207	PREDICTED: tensin-1 isoform X1 [Orcinus orca]	MSTRG.30891			0.877253	0.309555
Chr15_121752211_121761784	Pig.12266.1	Pig.14206	Pig.12266	circRNA	mRNA	1	0.0907268	0.72537	0.00758833	0.127324	Chr12_28849(-0.704242815204|-0.608391608392)	Pig.14206	TNS1-207	PREDICTED: tensin-1 isoform X1 [Orcinus orca]	Pig.12266	PLIN3-201	perilipin-5 [Sus scrofa]	0.926978	0.198412
Chr15_121752211_121761784	Pig.18741.1	Pig.14206	Pig.18741	circRNA	mRNA	1	0.0907268	0.613765	0.0337676	0.207077	Chr12_28849(-0.704242815204|-0.718039630047)	Pig.14206	TNS1-207	PREDICTED: tensin-1 isoform X1 [Orcinus orca]	Pig.18741	AFF2-201	AF4/FMR2 family member 2 isoform X3 [Sus scrofa]	0.9903	0.395017
Chr15_121752211_121761784	Pig.00055.1	Pig.14206	Pig.00055	circRNA	mRNA	1	0.0473684	0.640861	0.0247359	0.186127	Chr12_28849(-0.704242815204|-0.587412587413)	Pig.14206	TNS1-207	PREDICTED: tensin-1 isoform X1 [Orcinus orca]	Pig.00055	MARS2-202	methionine--tRNA ligase, mitochondrial isoform X1 [Sus scrofa]	0.90955	0.245464
Chr15_121752211_121761784	Pig.02564.1	Pig.14206	Pig.02564	circRNA	mRNA	1	0.0473684	0.640861	0.0247359	0.186127	mir-361:ssc-miR-361-3p(-0.633818533684|-0.594405594406)	Pig.14206	TNS1-207	PREDICTED: tensin-1 isoform X1 [Orcinus orca]	Pig.02564	MXD3-201	max dimerization protein 3 [Sus scrofa]	0.967911	0.216243
Chr15_121752211_121761784	Pig.17052.1	Pig.14206	Pig.17052	circRNA	mRNA	1	0.0473684	0.631402	0.0276604	0.195771	Chr12_28849(-0.704242815204|-0.679510674288)	Pig.14206	TNS1-207	PREDICTED: tensin-1 isoform X1 [Orcinus orca]	Pig.17052	FOXRED2-201	FAD-dependent oxidoreductase domain-containing protein 2 precursor [Sus scrofa]	0.982127	0.33793
Chr15_121752211_121761784	MSTRG.21578.1	Pig.14206	MSTRG.21578	circRNA	mRNA	2	0.0178817	0.626776	0.0291781	0.198294	mir-361:ssc-miR-361-3p(-0.633818533684|-0.776223776224);Chr02_5821(-0.838048950093|-0.58041958042)	Pig.14206	TNS1-207	PREDICTED: tensin-1 isoform X1 [Orcinus orca]	MSTRG.21578			0.978406	0.330614
Chr15_121752211_121761784	MSTRG.34975.2	Pig.14206	MSTRG.34975	circRNA	mRNA	1	0.0473684	0.740751	0.00585279	0.119527	Chr12_28849(-0.704242815204|-0.728547527072)	Pig.14206	TNS1-207	PREDICTED: tensin-1 isoform X1 [Orcinus orca]	MSTRG.34975			0.983037	0.272587
Chr15_121752211_121761784	Pig.16786.1	Pig.14206	Pig.16786	circRNA	mRNA	1	0.1663	0.903011	5.73241e-05	0.0511857	Chr12_28849(-0.704242815204|-0.672505409605)	Pig.14206	TNS1-207	PREDICTED: tensin-1 isoform X1 [Orcinus orca]	Pig.16786	TTYH1-201	protein tweety homolog 1 isoform X1 [Sus scrofa]	0.976948	0.0857765
Chr15_121752211_121761784	Pig.20023.1	Pig.14206	Pig.20023	circRNA	mRNA	1	0.0473684	0.831007	0.000811316	0.0795415	Chr12_28849(-0.704242815204|-0.685314685315)	Pig.14206	TNS1-207	PREDICTED: tensin-1 isoform X1 [Orcinus orca]	Pig.20023	MYADML2-201	myeloid-associated differentiation marker-like protein 2 [Sus scrofa]	0.986378	0.157194
Chr15_121752211_121761784	Pig.00221.1	Pig.14206	Pig.00221	circRNA	mRNA	1	0.0473684	0.788576	0.00230423	0.0938036	Chr02_5821(-0.838048950093|-0.822194225522)	Pig.14206	TNS1-207	PREDICTED: tensin-1 isoform X1 [Orcinus orca]	Pig.00221	SCN3A-201	sodium channel protein type 3 subunit alpha isoform X6 [Sus scrofa]	0.99045	0.468064
Chr15_121752211_121761784	Pig.22014.1	Pig.14206	Pig.22014	circRNA	mRNA	1	0.0473684	0.811299	0.00135962	0.0864374	mir-361:ssc-miR-361-3p(-0.633818533684|-0.64098171853)	Pig.14206	TNS1-207	PREDICTED: tensin-1 isoform X1 [Orcinus orca]	Pig.22014	RABL2B	rab-like protein 2A isoform X2 [Sus scrofa]	0.994381	0.12907
Chr15_121752211_121761784	Pig.18305.1	Pig.14206	Pig.18305	circRNA	mRNA	1	0.1663	0.654946	0.0208059	0.174251	Chr18_40848(-0.777822745128|-0.587281589659)	Pig.14206	TNS1-207	PREDICTED: tensin-1 isoform X1 [Orcinus orca]	Pig.18305	CYGB	cytoglobin isoform X1 [Sus scrofa]	0.86042	0.265421
Chr15_121752211_121761784	MSTRG.34668.1	Pig.14206	MSTRG.34668	circRNA	mRNA	1	0.0473684	0.819149	0.00111495	0.0854743	Chr12_28849(-0.704242815204|-0.721848885584)	Pig.14206	TNS1-207	PREDICTED: tensin-1 isoform X1 [Orcinus orca]	MSTRG.34668			0.987654	0.186594
Chr15_121752211_121761784	Pig.10509.1	Pig.14206	Pig.10509	circRNA	mRNA	1	0.0907268	0.760582	0.00407753	0.107613	Chr12_28849(-0.704242815204|-0.783216783217)	Pig.14206	TNS1-207	PREDICTED: tensin-1 isoform X1 [Orcinus orca]	Pig.10509	CCDC42-201	dolichol-phosphate mannosyltransferase subunit 3 [Sus scrofa]	0.946907	0.287089
Chr15_121752211_121761784	Pig.09950.1	Pig.14206	Pig.09950	circRNA	mRNA	1	0.0473684	0.613765	0.0337676	0.207077	Chr12_28849(-0.704242815204|-0.70402910068)	Pig.14206	TNS1-207	PREDICTED: tensin-1 isoform X1 [Orcinus orca]	Pig.09950	FANCC	Fanconi anemia group C protein isoform X1 [Sus scrofa]	0.999848	0.379811
Chr15_121752211_121761784	MSTRG.17879.1	Pig.14206	MSTRG.17879	circRNA	mRNA	1	0.1663	0.710252	0.00964437	0.135973	Chr12_28849(-0.704242815204|-0.719302673468)	Pig.14206	TNS1-207	PREDICTED: tensin-1 isoform X1 [Orcinus orca]	MSTRG.17879			0.989421	0.297264
Chr15_121752211_121761784	Pig.15616.1	Pig.14206	Pig.15616	circRNA	mRNA	1	0.0473684	0.718328	0.00850036	0.130155	Chr12_28849(-0.704242815204|-0.776223776224)	Pig.14206	TNS1-207	PREDICTED: tensin-1 isoform X1 [Orcinus orca]	Pig.15616	SNX17-201	PREDICTED: sorting nexin-17 isoform X1 [Trichechus manatus latirostris]	0.95138	0.334775
Chr15_121752211_121761784	Pig.12644.1	Pig.14206	Pig.12644	circRNA	mRNA	1	0.0473684	0.767625	0.00355762	0.103583	Chr12_28849(-0.704242815204|-0.804195804196)	Pig.14206	TNS1-207	PREDICTED: tensin-1 isoform X1 [Orcinus orca]	Pig.12644	UROD-201	uroporphyrinogen decarboxylase [Sus scrofa]	0.933737	0.29064
Chr15_121752211_121761784	Pig.18042.1	Pig.14206	Pig.18042	circRNA	mRNA	1	0.0907268	0.591564	0.0427573	0.223159	Chr12_28849(-0.704242815204|-0.643356643357)	Pig.14206	TNS1-207	PREDICTED: tensin-1 isoform X1 [Orcinus orca]	Pig.18042	TREX2-201	three prime repair exonuclease 2 [Sus scrofa]	0.954819	0.336772
Chr15_121752211_121761784	Pig.09306.1	Pig.14206	Pig.09306	circRNA	mRNA	1	0.130299	0.776025	0.00300509	0.100207	Chr12_28849(-0.704242815204|-0.858144923714)	Pig.14206	TNS1-207	PREDICTED: tensin-1 isoform X1 [Orcinus orca]	Pig.09306	PTK7-201	inactive tyrosine-protein kinase 7 [Sus scrofa]	0.901496	0.305014
Chr15_121752211_121761784	Pig.15852.1	Pig.14206	Pig.15852	circRNA	mRNA	1	0.0907268	0.578491	0.0487797	0.233043	Chr12_28849(-0.704242815204|-0.812610703272)	Pig.14206	TNS1-207	PREDICTED: tensin-1 isoform X1 [Orcinus orca]	Pig.15852	UBA7-201	ubiquitin-like modifier-activating enzyme 7 [Sus scrofa]	0.928557	0.563468
Chr15_121752211_121761784	Pig.17713.1	Pig.14206	Pig.17713	circRNA	mRNA	1	0.198934	0.784457	0.00251873	0.0962432	Chr12_28849(-0.704242815204|-0.659653183473)	Pig.14206	TNS1-207	PREDICTED: tensin-1 isoform X1 [Orcinus orca]	Pig.17713	FBN3-203	fibrillin-3 [Sus scrofa]	0.967307	0.184924
Chr15_121752211_121761784	MSTRG.30061.2	Pig.14206	MSTRG.30061	circRNA	mRNA	1	0.198934	0.765443	0.00371297	0.10581	Chr12_28849(-0.704242815204|-0.595447498088)	Pig.14206	TNS1-207	PREDICTED: tensin-1 isoform X1 [Orcinus orca]	MSTRG.30061			0.916291	0.158646
Chr15_121752211_121761784	Pig.07590.1	Pig.14206	Pig.07590	circRNA	mRNA	1	0.0473684	0.715307	0.00891567	0.1336	mir-664:ssc-miR-664-3p(-0.838048950093|-0.710287260204)	Pig.14206	TNS1-207	PREDICTED: tensin-1 isoform X1 [Orcinus orca]	Pig.07590	DHH-201	PREDICTED: desert hedgehog protein [Microtus ochrogaster]	0.917485	0.402714
Chr15_121752211_121761784	Pig.18928.1	Pig.14206	Pig.18928	circRNA	mRNA	1	0.0473684	0.760582	0.00407753	0.107613	mir-664:ssc-miR-664-5p(-0.76058224042|-0.629370629371)	Pig.14206	TNS1-207	PREDICTED: tensin-1 isoform X1 [Orcinus orca]	Pig.18928	ISG12(A)-202	uncharacterized protein LOC100153902 [Sus scrofa]	0.9056	0.201855
Chr15_121752211_121761784	Pig.09158.1	Pig.14206	Pig.09158	circRNA	mRNA	1	0.130299	0.72537	0.00758833	0.127324	Chr12_28849(-0.704242815204|-0.65034965035)	Pig.14206	TNS1-207	PREDICTED: tensin-1 isoform X1 [Orcinus orca]	Pig.09158	SLC12A9-201	solute carrier family 12 member 9 isoform X1 [Sus scrofa]	0.960214	0.229614
Chr15_121752211_121761784	Pig.06513.1	Pig.14206	Pig.06513	circRNA	mRNA	1	0.0473684	0.659621	0.0196084	0.173534	Chr10_25226(-0.774667096724|-0.672505409605)	Pig.14206	TNS1-207	PREDICTED: tensin-1 isoform X1 [Orcinus orca]	Pig.06513	EPHB3-201	ephrin type-B receptor 3 isoform X1 [Sus scrofa]	0.929406	0.363361
Chr15_121752211_121761784	MSTRG.10050.1	Pig.14206	MSTRG.10050	circRNA	mRNA	1	0.0907268	0.758388	0.00425071	0.110818	Chr12_28849(-0.704242815204|-0.718039630047)	Pig.14206	TNS1-207	PREDICTED: tensin-1 isoform X1 [Orcinus orca]	MSTRG.10050			0.9903	0.24696
Chr15_121752211_121761784	MSTRG.9602.1	Pig.14206	MSTRG.9602	circRNA	mRNA	2	0.0258076	0.640861	0.0247359	0.186127	Chr10_24748(-0.711285243356|-0.762237762238);Chr10_25226(-0.774667096724|-0.622377622378)	Pig.14206	TNS1-207	PREDICTED: tensin-1 isoform X1 [Orcinus orca]	MSTRG.9602			0.993461	0.372065
Chr09_36188939_36207901	Pig.22620.1	Pig.00318	Pig.22620	circRNA	mRNA	1	0.071345	0.58042	0.047856	0.23044	Chr12_28094(-0.777584379856|-0.72504489473)	Pig.00318	PHTF2-204	putative homeodomain transcription factor 2 isoform X2 [Sus scrofa]	Pig.22620	RGS12-201	LOW QUALITY PROTEIN: regulator of G-protein signaling 12 [Sus scrofa]	0.965035	0.542003
Chr09_36188939_36207901	MSTRG.18963.2	Pig.00318	MSTRG.18963	circRNA	mRNA	1	0.071345	0.769231	0.00344645	0.103583	Chr12_28094(-0.777584379856|-0.774081747514)	Pig.00318	PHTF2-204	putative homeodomain transcription factor 2 isoform X2 [Sus scrofa]	MSTRG.18963			0.997743	0.348911
Chr09_36188939_36207901	Pig.21446.1	Pig.00318	Pig.21446	circRNA	mRNA	1	0.0105263	0.601399	0.0385885	0.216593	Chr12_28094(-0.777584379856|-0.86865282074)	Pig.00318	PHTF2-204	putative homeodomain transcription factor 2 isoform X2 [Sus scrofa]	Pig.21446	CYBA-201	cytochrome b-245 light chain isoform X1 [Sus scrofa]	0.944681	0.839119
Chr07_127317226_127328596	Pig.17492.1	Pig.11473	Pig.17492	circRNA	mRNA	1	0.0897776	0.819616	0.00110155	0.0854743	Chr02_7181(-0.781087012197|-0.731578947368)	Pig.11473	Tnxb	tenascin-X isoform X5 [Sus scrofa]	Pig.17492	TUB-201	tubby protein homolog isoform X2 [Sus scrofa]	0.967271	0.236607
Chr07_127317226_127328596	MSTRG.19396.1	Pig.11473	MSTRG.19396	circRNA	mRNA	1	0.0611635	0.734266	0.00654349	0.123576	Chr03_9544(-0.755244755245|-0.853146853147)	Pig.11473	Tnxb	tenascin-X isoform X5 [Sus scrofa]	MSTRG.19396			0.93913	0.471252
Chr07_127317226_127328596	Pig.06366.1	Pig.11473	Pig.06366	circRNA	mRNA	1	0.0312448	0.776224	0.00299286	0.100207	Chr02_7181(-0.781087012197|-0.591944865746)	Pig.11473	Tnxb	tenascin-X isoform X5 [Sus scrofa]	Pig.06366	SLC27A1-204	long-chain fatty acid transport protein 1 isoform X1 [Sus scrofa]	0.862245	0.152577
Chr07_127317226_127328596	Pig.11423.1	Pig.11473	Pig.11423	circRNA	mRNA	1	0.0157895	0.706294	0.0102452	0.139666	Chr02_7181(-0.781087012197|-0.616463292138)	Pig.11473	Tnxb	tenascin-X isoform X5 [Sus scrofa]	Pig.11423	MICB	MHC class I polypeptide-related sequence B isoform X1 [Sus scrofa]	0.882206	0.249103
Chr07_127317226_127328596	Pig.22620.1	Pig.11473	Pig.22620	circRNA	mRNA	1	0.103602	0.755245	0.00450844	0.112606	Chr12_28094(-0.72504489473|-0.72504489473)	Pig.11473	Tnxb	tenascin-X isoform X5 [Sus scrofa]	Pig.22620	RGS12-201	LOW QUALITY PROTEIN: regulator of G-protein signaling 12 [Sus scrofa]	1	0.271269
Chr07_127317226_127328596	Pig.18173.1	Pig.11473	Pig.18173	circRNA	mRNA	1	0.0157895	0.615385	0.0331699	0.205087	Chr02_7181(-0.781087012197|-0.619965924479)	Pig.11473	Tnxb	tenascin-X isoform X5 [Sus scrofa]	Pig.18173	SLC27A3-201	long-chain fatty acid transport protein 3 isoform X1 [Sus scrofa]	0.885	0.347725
Chr07_127317226_127328596	Pig.02404.1	Pig.11473	Pig.02404	circRNA	mRNA	1	0.0463686	0.594406	0.0415215	0.221137	Chr02_7181(-0.781087012197|-0.588442233404)	Pig.11473	Tnxb	tenascin-X isoform X5 [Sus scrofa]	Pig.02404	NRK-202	nik-related protein kinase isoform X1 [Sus scrofa]	0.859335	0.327444
Chr07_127317226_127328596	Pig.19937.1	Pig.11473	Pig.19937	circRNA	mRNA	1	0.0312448	0.769231	0.00344645	0.103583	Chr02_7181(-0.781087012197|-0.735552791755)	Pig.11473	Tnxb	tenascin-X isoform X5 [Sus scrofa]	Pig.19937	INTS5-201	LOW QUALITY PROTEIN: integrator complex subunit 5 [Sus scrofa]	0.969977	0.308975
Chr07_127317226_127328596	Pig.16028.1	Pig.11473	Pig.16028	circRNA	mRNA	1	0.0611635	0.792987	0.00209029	0.0938036	Chr02_7181(-0.781087012197|-0.688929007709)	Pig.11473	Tnxb	tenascin-X isoform X5 [Sus scrofa]	Pig.16028	WDR62-201	WD repeat-containing protein 62 [Sus scrofa]	0.937308	0.229854
Chr07_127317226_127328596	MSTRG.18963.2	Pig.11473	MSTRG.18963	circRNA	mRNA	2	0.00341545	0.79021	0.00222314	0.0938036	Chr03_9544(-0.755244755245|-0.874125874126);Chr12_28094(-0.72504489473|-0.774081747514)	Pig.11473	Tnxb	tenascin-X isoform X5 [Sus scrofa]	MSTRG.18963			0.996803	0.323411
Chr07_127317226_127328596	Pig.20585.1	Pig.11473	Pig.20585	circRNA	mRNA	1	0.0463686	0.679511	0.0150702	0.159036	Chr02_7181(-0.781087012197|-0.585964912281)	Pig.11473	Tnxb	tenascin-X isoform X5 [Sus scrofa]	Pig.20585	TONSL-201	tonsoku-like protein isoform X1 [Sus scrofa]	0.857268	0.241122
Chr07_127317226_127328596	Pig.07973.1	Pig.11473	Pig.07973	circRNA	mRNA	1	0.0312448	0.762238	0.00395045	0.107434	Chr02_7181(-0.781087012197|-0.651489615555)	Pig.11473	Tnxb	tenascin-X isoform X5 [Sus scrofa]	Pig.07973	TMEM94-201	transmembrane protein 94 isoform X6 [Sus scrofa]	0.909535	0.227394
Chr07_127317226_127328596	Pig.12266.1	Pig.11473	Pig.12266	circRNA	mRNA	1	0.0312448	0.832168	0.000785442	0.0795415	Chr02_7181(-0.781087012197|-0.714536997705)	Pig.11473	Tnxb	tenascin-X isoform X5 [Sus scrofa]	Pig.12266	PLIN3-201	perilipin-5 [Sus scrofa]	0.955504	0.204822
Chr07_127317226_127328596	Pig.21446.1	Pig.11473	Pig.21446	circRNA	mRNA	1	0.0157895	0.685315	0.013906	0.152823	Chr12_28094(-0.72504489473|-0.86865282074)	Pig.11473	Tnxb	tenascin-X isoform X5 [Sus scrofa]	Pig.21446	CYBA-201	cytochrome b-245 light chain isoform X1 [Sus scrofa]	0.90989	0.522645
Chr07_127317226_127328596	Pig.19812.1	Pig.11473	Pig.19812	circRNA	mRNA	1	0.0312448	0.734266	0.00654349	0.123576	Chr03_9544(-0.755244755245|-0.818181818182)	Pig.11473	Tnxb	tenascin-X isoform X5 [Sus scrofa]	Pig.19812	SGSH-201	N-sulphoglucosamine sulphohydrolase [Sus scrofa]	0.96	0.425556
Chr07_127317226_127328596	Pig.10835.1	Pig.11473	Pig.10835	circRNA	mRNA	1	0.0756323	0.819616	0.00110155	0.0854743	Chr03_9544(-0.755244755245|-0.844134394348)	Pig.11473	Tnxb	tenascin-X isoform X5 [Sus scrofa]	Pig.10835	DISP1-201	protein dispatched homolog 1 isoform X3 [Sus scrofa]	0.944422	0.301443
Chr07_127317226_127328596	Pig.08095.1	Pig.11473	Pig.08095	circRNA	mRNA	1	0.0157895	0.608392	0.035806	0.209995	Chr02_7181(-0.781087012197|-0.665500144921)	Pig.11473	Tnxb	tenascin-X isoform X5 [Sus scrofa]	Pig.08095	CTHRC1-202	collagen triple helix repeat-containing protein 1 [Sus scrofa]	0.920097	0.418337
Chr07_127317226_127328596	Pig.14510.1	Pig.11473	Pig.14510	circRNA	mRNA	1	0.0312448	0.853147	0.000418118	0.0714832	Chr02_7181(-0.781087012197|-0.690018571313)	Pig.11473	Tnxb	tenascin-X isoform X5 [Sus scrofa]	Pig.14510	LRP3-201	low-density lipoprotein receptor-related protein 3 isoform X1 [Sus scrofa]	0.938095	0.157979
Chr07_127317226_127328596	Pig.09185.1	Pig.11473	Pig.09185	circRNA	mRNA	1	0.0157895	0.601399	0.0385885	0.216593	Chr02_7181(-0.781087012197|-0.612960659796)	Pig.11473	Tnxb	tenascin-X isoform X5 [Sus scrofa]	Pig.09185	ORAI2-201	PREDICTED: protein orai-2 [Lipotes vexillifer]	0.879397	0.352854
Chr07_127317226_127328596	Pig.04569.1	Pig.11473	Pig.04569	circRNA	mRNA	1	0.0157895	0.721542	0.00807444	0.128514	Chr02_7181(-0.781087012197|-0.677192982456)	Pig.11473	Tnxb	tenascin-X isoform X5 [Sus scrofa]	Pig.04569	C1QTNF2-201	PREDICTED: complement C1q tumor necrosis factor-related protein 2 [Bos taurus]	0.928756	0.302358
Chr07_127317226_127328596	Pig.15118.1	Pig.11473	Pig.15118	circRNA	mRNA	1	0.0157895	0.804196	0.00161477	0.0904396	Chr02_7181(-0.781087012197|-0.577934336379)	Pig.11473	Tnxb	tenascin-X isoform X5 [Sus scrofa]	Pig.15118	Gatd3a	ES1 protein homolog, mitochondrial [Sus scrofa]	0.850515	0.111903
Chr07_127317226_127328596	Pig.10345.1	Pig.11473	Pig.10345	circRNA	mRNA	1	0.0463686	0.844134	0.000554262	0.0742364	Chr02_7181(-0.781087012197|-0.677192982456)	Pig.11473	Tnxb	tenascin-X isoform X5 [Sus scrofa]	Pig.10345	ZNF263-201	zinc finger protein 263 isoform X1 [Sus scrofa]	0.928756	0.158128
Chr07_127317226_127328596	Pig.01857.1	Pig.11473	Pig.01857	circRNA	mRNA	1	0.0157895	0.79021	0.00222314	0.0938036	Chr03_9544(-0.755244755245|-0.832167832168)	Pig.11473	Tnxb	tenascin-X isoform X5 [Sus scrofa]	Pig.01857	SRPX-204	sushi repeat-containing protein SRPX isoform X1 [Sus scrofa]	0.951542	0.345264
Chr07_127317226_127328596	Pig.03052.1	Pig.11473	Pig.03052	circRNA	mRNA	1	0.0463686	0.811189	0.00136332	0.0864374	Chr03_9544(-0.755244755245|-0.839160839161)	Pig.11473	Tnxb	tenascin-X isoform X5 [Sus scrofa]	Pig.03052	MTMR9	myotubularin-related protein 9 [Sus scrofa]	0.947368	0.313504
Chr07_127317226_127328596	MSTRG.12911.1	Pig.11473	MSTRG.12911	circRNA	mRNA	1	0.0157895	0.692308	0.012593	0.148606	Chr12_28094(-0.72504489473|-0.633976453846)	Pig.11473	Tnxb	tenascin-X isoform X5 [Sus scrofa]	MSTRG.12911			0.93299	0.255503
Chr07_127317226_127328596	Pig.14753.1	Pig.11473	Pig.14753	circRNA	mRNA	1	0.0312448	0.727273	0.00735503	0.127324	Chr02_7181(-0.781087012197|-0.732050159414)	Pig.11473	Tnxb	tenascin-X isoform X5 [Sus scrofa]	Pig.14753	VWCE-201	von Willebrand factor C and EGF domain-containing protein isoform X1 [Sus scrofa]	0.967593	0.361776
Chr07_127317226_127328596	Pig.10307.1	Pig.11473	Pig.10307	circRNA	mRNA	1	0.0157895	0.601399	0.0385885	0.216593	Chr02_7181(-0.781087012197|-0.66199751258)	Pig.11473	Tnxb	tenascin-X isoform X5 [Sus scrofa]	Pig.10307	CCNF-201	Cyclin-F [Fukomys damarensis]	0.917476	0.421229
Chr07_127317226_127328596	Pig.17713.1	Pig.11473	Pig.17713	circRNA	mRNA	1	0.0756323	0.715794	0.00884773	0.1336	Chr02_7181(-0.781087012197|-0.701231311418)	Pig.11473	Tnxb	tenascin-X isoform X5 [Sus scrofa]	Pig.17713	FBN3-203	fibrillin-3 [Sus scrofa]	0.946128	0.338251
Chr07_127317226_127328596	Pig.10363.1	Pig.11473	Pig.10363	circRNA	mRNA	1	0.0463686	0.685315	0.013906	0.152823	Chr02_7181(-0.781087012197|-0.588442233404)	Pig.11473	Tnxb	tenascin-X isoform X5 [Sus scrofa]	Pig.10363	CORO7-PAM16	coronin-7 isoform X1 [Sus scrofa]	0.859335	0.238288
Chr07_127317226_127328596	Pig.15342.1	Pig.11473	Pig.15342	circRNA	mRNA	1	0.0157895	0.875658	0.000189298	0.0630114	Chr03_9544(-0.755244755245|-0.816113335614)	Pig.11473	Tnxb	tenascin-X isoform X5 [Sus scrofa]	Pig.15342	TNKS1BP1	182 kDa tankyrase-1-binding protein-like [Sus scrofa]	0.961264	0.191102
Chr07_127317226_127328596	Pig.21962.1	Pig.11473	Pig.21962	circRNA	mRNA	1	0.0157895	0.895105	8.36659e-05	0.0609819	Chr02_7181(-0.781087012197|-0.70402910068)	Pig.11473	Tnxb	tenascin-X isoform X5 [Sus scrofa]	Pig.21962	SCUBE1-201	LOW QUALITY PROTEIN: signal peptide, CUB and EGF-like domain-containing protein 1 [Sus scrofa]	0.948113	0.116664
Chr07_127317226_127328596	Pig.08625.1	Pig.11473	Pig.08625	circRNA	mRNA	1	0.0611635	0.796496	0.00193124	0.0915734	Chr02_7181(-0.781087012197|-0.627417489163)	Pig.11473	Tnxb	tenascin-X isoform X5 [Sus scrofa]	Pig.08625	CROCC-201	LOW QUALITY PROTEIN: rootletin [Sus scrofa]	0.890899	0.166279
Chr07_127317226_127328596	Pig.11814.1	Pig.11473	Pig.11814	circRNA	mRNA	1	0.0312448	0.853147	0.000418118	0.0714832	Chr03_9544(-0.755244755245|-0.867132867133)	Pig.11473	Tnxb	tenascin-X isoform X5 [Sus scrofa]	Pig.11814	NOS2-203	nitric oxide synthase, inducible isoform X1 [Sus scrofa]	0.931034	0.245879
Chr07_127317226_127328596	Pig.12641.1	Pig.11473	Pig.12641	circRNA	mRNA	2	0.000498587	0.811189	0.00136332	0.0864374	Chr03_9544(-0.755244755245|-0.839160839161);Chr02_7181(-0.781087012197|-0.707531733022)	Pig.11473	Tnxb	tenascin-X isoform X5 [Sus scrofa]	Pig.12641	MUTYH	adenine DNA glycosylase isoform X1 [Sus scrofa]	0.997394	0.269389
Chr07_127317226_127328596	MSTRG.21693.1	Pig.11473	MSTRG.21693	circRNA	mRNA	2	0.00164418	0.693521	0.0123749	0.148606	Chr02_7181(-0.781087012197|-0.578947368421);Chr12_28094(-0.72504489473|-0.652631578947)	Pig.11473	Tnxb	tenascin-X isoform X5 [Sus scrofa]	MSTRG.21693			0.987573	0.245413
Chr07_127317226_127328596	Pig.17197.1	Pig.11473	Pig.17197	circRNA	mRNA	1	0.0463686	0.727273	0.00735503	0.127324	Chr02_7181(-0.781087012197|-0.739055424097)	Pig.11473	Tnxb	tenascin-X isoform X5 [Sus scrofa]	Pig.17197	KPTN-201	kaptin isoform X1 [Sus scrofa]	0.97235	0.370658
Chr11_52477801_52507914	Pig.17492.1	Pig.04496	Pig.17492	circRNA	mRNA	1	0.263901	0.775439	0.00304139	0.100582	Chr02_7181(-0.891228070175|-0.731578947368)	Pig.04496	LMO7-201	LIM domain only protein 7 isoform X1 [Sus scrofa]	Pig.17492	TUB-201	tubby protein homolog isoform X2 [Sus scrofa]	0.901622	0.37625
Chr11_52477801_52507914	Pig.15991.1	Pig.04496	Pig.15991	circRNA	mRNA	2	0.0166572	0.800717	0.0017524	0.0915734	ChrX_42092(-0.633976453846|-0.676073102596);Chr07_20261(-0.619965924479|-0.711285243356)	Pig.04496	LMO7-201	LIM domain only protein 7 isoform X1 [Sus scrofa]	Pig.15991	CD22-201	B-cell receptor CD22 [Sus scrofa]	0.997131	0.148076
Chr11_52477801_52507914	Pig.14610.1	Pig.04496	Pig.14610	circRNA	mRNA	1	0.109663	0.666667	0.0179001	0.168245	Chr02_7024(-0.606138612274|-0.707755967861)	Pig.04496	LMO7-201	LIM domain only protein 7 isoform X1 [Sus scrofa]	Pig.14610	AK8-201	adenylate kinase 8 isoform X3 [Sus scrofa]	0.922659	0.243684
Chr11_52477801_52507914	Pig.20594.1	Pig.04496	Pig.20594	circRNA	mRNA	1	0.196555	0.702469	0.0108518	0.142846	Scaffold1533_43934(-0.751333268085|-0.68318691078)	Pig.04496	LMO7-201	LIM domain only protein 7 isoform X1 [Sus scrofa]	Pig.20594	LRRC14-202	leucine-rich repeat-containing protein 14 [Sus scrofa]	0.952495	0.309926
Chr11_52477801_52507914	Pig.16324.1	Pig.04496	Pig.16324	circRNA	mRNA	2	0.00306321	0.781087	0.0027053	0.0972726	Chr07_20261(-0.619965924479|-0.65034965035);ChrX_42092(-0.633976453846|-0.58041958042)	Pig.04496	LMO7-201	LIM domain only protein 7 isoform X1 [Sus scrofa]	Pig.16324	HOOK2-202	protein Hook homolog 2 isoform X2 [Sus scrofa]	0.998741	0.136083
Chr11_52477801_52507914	Pig.12664.1	Pig.04496	Pig.12664	circRNA	mRNA	2	0.00874971	0.626316	0.0293323	0.198294	ChrX_42092(-0.633976453846|-0.893171247131);Chr07_20261(-0.619965924479|-0.93170020289)	Pig.04496	LMO7-201	LIM domain only protein 7 isoform X1 [Sus scrofa]	Pig.12664	CCDC24-202	coiled-coil domain-containing protein 24 isoform X2 [Sus scrofa]	0.965416	0.454534
Chr11_52477801_52507914	Pig.11423.1	Pig.04496	Pig.11423	circRNA	mRNA	1	0.0578947	0.633976	0.0268409	0.192217	Chr02_7181(-0.891228070175|-0.616463292138)	Pig.04496	LMO7-201	LIM domain only protein 7 isoform X1 [Sus scrofa]	Pig.11423	MICB	MHC class I polypeptide-related sequence B isoform X1 [Sus scrofa]	0.817758	0.397175
Chr11_52477801_52507914	Pig.07970.1	Pig.04496	Pig.07970	circRNA	mRNA	1	0.232484	0.640982	0.0247	0.186127	Chr12_28849(-0.581436968721|-0.629370629371)	Pig.04496	LMO7-201	LIM domain only protein 7 isoform X1 [Sus scrofa]	Pig.07970	LLGL2-202	lethal(2) giant larvae protein homolog 2 [Sus scrofa]	0.960412	0.205958
Chr11_52477801_52507914	Pig.22620.1	Pig.04496	Pig.22620	circRNA	mRNA	1	0.291152	0.679511	0.0150702	0.159036	Chr12_28094(-0.821052631579|-0.72504489473)	Pig.04496	LMO7-201	LIM domain only protein 7 isoform X1 [Sus scrofa]	Pig.22620	RGS12-201	LOW QUALITY PROTEIN: regulator of G-protein signaling 12 [Sus scrofa]	0.937903	0.465314
Chr11_52477801_52507914	Pig.18173.1	Pig.04496	Pig.18173	circRNA	mRNA	1	0.0578947	0.669003	0.0173586	0.164599	Chr02_7181(-0.891228070175|-0.619965924479)	Pig.04496	LMO7-201	LIM domain only protein 7 isoform X1 [Sus scrofa]	Pig.18173	SLC27A3-201	long-chain fatty acid transport protein 3 isoform X1 [Sus scrofa]	0.820498	0.341718
Chr11_52477801_52507914	Pig.06432.1	Pig.04496	Pig.06432	circRNA	mRNA	1	0.109663	0.725045	0.00762875	0.127324	Chr12_28849(-0.581436968721|-0.594405594406)	Pig.04496	LMO7-201	LIM domain only protein 7 isoform X1 [Sus scrofa]	Pig.06432	NOTCH3-201	neurogenic locus notch homolog protein 3 [Sus scrofa]	0.988971	0.145101
Chr11_52477801_52507914	Pig.19937.1	Pig.04496	Pig.19937	circRNA	mRNA	1	0.109663	0.619966	0.0315202	0.201756	Chr02_7181(-0.891228070175|-0.735552791755)	Pig.04496	LMO7-201	LIM domain only protein 7 isoform X1 [Sus scrofa]	Pig.19937	INTS5-201	LOW QUALITY PROTEIN: integrator complex subunit 5 [Sus scrofa]	0.904305	0.735758
Chr11_52477801_52507914	Pig.16028.1	Pig.04496	Pig.16028	circRNA	mRNA	1	0.196555	0.688929	0.0132154	0.151114	Chr02_7181(-0.891228070175|-0.688929007709)	Pig.04496	LMO7-201	LIM domain only protein 7 isoform X1 [Sus scrofa]	Pig.16028	WDR62-201	WD repeat-containing protein 62 [Sus scrofa]	0.871975	0.460986
Chr11_52477801_52507914	Pig.08754.1	Pig.04496	Pig.08754	circRNA	mRNA	2	0.00874971	0.612281	0.0343222	0.207381	Chr07_20261(-0.619965924479|-0.749563321122);ChrX_42092(-0.633976453846|-0.739055424097)	Pig.04496	LMO7-201	LIM domain only protein 7 isoform X1 [Sus scrofa]	Pig.08754	HJURP-201	Holliday junction recognition protein [Sus scrofa]	0.992594	0.332255
Chr11_52477801_52507914	MSTRG.18963.2	Pig.04496	MSTRG.18963	circRNA	mRNA	2	0.0501986	0.679511	0.0150702	0.159036	ssc-miR-1842(-0.774081747514|-0.671328671329);Chr12_28094(-0.821052631579|-0.774081747514)	Pig.04496	LMO7-201	LIM domain only protein 7 isoform X1 [Sus scrofa]	MSTRG.18963			0.99704	0.448373
Chr11_52477801_52507914	Pig.18699.1	Pig.04496	Pig.18699	circRNA	mRNA	2	0.0264187	0.605955	0.0367585	0.213363	Chr02_7024(-0.606138612274|-0.683382213421);Chr12_28849(-0.581436968721|-0.762237762238)	Pig.04496	LMO7-201	LIM domain only protein 7 isoform X1 [Sus scrofa]	Pig.18699	NCAPD2-202	condensin complex subunit 1 isoform X1 [Sus scrofa]	0.989153	0.286328
Chr11_52477801_52507914	Pig.07973.1	Pig.04496	Pig.07973	circRNA	mRNA	1	0.109663	0.577934	0.0490488	0.233043	Chr02_7181(-0.891228070175|-0.651489615555)	Pig.04496	LMO7-201	LIM domain only protein 7 isoform X1 [Sus scrofa]	Pig.07973	TMEM94-201	transmembrane protein 94 isoform X6 [Sus scrofa]	0.8446	0.585756
Chr11_52477801_52507914	Pig.12266.1	Pig.04496	Pig.12266	circRNA	mRNA	2	0.00306321	0.679511	0.0150702	0.159036	Chr12_28849(-0.581436968721|-0.608391608392);Chr02_7181(-0.891228070175|-0.714536997705)	Pig.04496	LMO7-201	LIM domain only protein 7 isoform X1 [Sus scrofa]	Pig.12266	PLIN3-201	perilipin-5 [Sus scrofa]	0.993689	0.359971
Chr11_52477801_52507914	Pig.10552.1	Pig.04496	Pig.10552	circRNA	mRNA	1	0.109663	0.73205	0.00679293	0.123576	Chr12_28849(-0.581436968721|-0.671328671329)	Pig.04496	LMO7-201	LIM domain only protein 7 isoform X1 [Sus scrofa]	Pig.10552	IQGAP3-201	ras GTPase-activating-like protein IQGAP3 isoform X1 [Sus scrofa]	0.928245	0.16536
Chr11_52477801_52507914	Pig.17042.1	Pig.04496	Pig.17042	circRNA	mRNA	2	0.00874971	0.616463	0.032776	0.205087	ChrX_42092(-0.633976453846|-0.748251748252);Chr07_20261(-0.619965924479|-0.846153846154)	Pig.04496	LMO7-201	LIM domain only protein 7 isoform X1 [Sus scrofa]	Pig.17042	C1QTNF6-201	complement C1q tumor necrosis factor-related protein 6 precursor [Sus scrofa]	0.984682	0.368131
Chr11_52477801_52507914	Pig.21446.1	Pig.04496	Pig.21446	circRNA	mRNA	1	0.0578947	0.686516	0.0136736	0.152823	Chr12_28094(-0.821052631579|-0.86865282074)	Pig.04496	LMO7-201	LIM domain only protein 7 isoform X1 [Sus scrofa]	Pig.21446	CYBA-201	cytochrome b-245 light chain isoform X1 [Sus scrofa]	0.971829	0.780903
Chr11_52477801_52507914	Pig.23215.1	Pig.04496	Pig.23215	circRNA	mRNA	1	0.0578947	0.612961	0.0340673	0.207077	Chr02_7024(-0.606138612274|-0.612196566189)	Pig.04496	LMO7-201	LIM domain only protein 7 isoform X1 [Sus scrofa]	Pig.23215	RNPEP-201	aminopeptidase B [Sus scrofa]	0.995028	0.228342
Chr11_52477801_52507914	Pig.00055.1	Pig.04496	Pig.00055	circRNA	mRNA	1	0.0578947	0.616463	0.032776	0.205087	Chr12_28849(-0.581436968721|-0.587412587413)	Pig.04496	LMO7-201	LIM domain only protein 7 isoform X1 [Sus scrofa]	Pig.00055	MARS2-202	methionine--tRNA ligase, mitochondrial isoform X1 [Sus scrofa]	0.994888	0.198924
Chr11_52477801_52507914	Pig.03913.1	Pig.04496	Pig.03913	circRNA	mRNA	1	0.0578947	0.58494	0.0457391	0.227326	Chr12_28849(-0.581436968721|-0.65034965035)	Pig.04496	LMO7-201	LIM domain only protein 7 isoform X1 [Sus scrofa]	Pig.03913	SPAG8-203	sperm-associated antigen 8 [Sus scrofa]	0.944055	0.250326
Chr11_52477801_52507914	Pig.17052.1	Pig.04496	Pig.17052	circRNA	mRNA	1	0.0578947	0.592982	0.0421372	0.223159	Chr12_28849(-0.581436968721|-0.679510674288)	Pig.04496	LMO7-201	LIM domain only protein 7 isoform X1 [Sus scrofa]	Pig.17052	FOXRED2-201	FAD-dependent oxidoreductase domain-containing protein 2 precursor [Sus scrofa]	0.922222	0.261455
Chr11_52477801_52507914	Pig.11889.1	Pig.04496	Pig.11889	circRNA	mRNA	2	0.00874971	0.739055	0.00602782	0.119527	Chr07_20261(-0.619965924479|-0.748251748252);ChrX_42092(-0.633976453846|-0.776223776224)	Pig.04496	LMO7-201	LIM domain only protein 7 isoform X1 [Sus scrofa]	Pig.11889	E2F1-201	transcription factor E2F1 [Sus scrofa]	0.990517	0.2215
Chr11_52477801_52507914	Pig.09309.1	Pig.04496	Pig.09309	circRNA	mRNA	3	0.000561479	0.591945	0.0425902	0.223159	Scaffold1533_43934(-0.751333268085|-0.683115530748);ChrX_42092(-0.633976453846|-0.615384615385);Chr07_20261(-0.619965924479|-0.706293706294)	Pig.04496	LMO7-201	LIM domain only protein 7 isoform X1 [Sus scrofa]	Pig.09309	CUL7-201	cullin-7 isoform X2 [Sus scrofa]	0.999871	0.334705
Chr11_52477801_52507914	Pig.16786.1	Pig.04496	Pig.16786	circRNA	mRNA	1	0.196555	0.6	0.0391629	0.218444	Chr12_28849(-0.581436968721|-0.672505409605)	Pig.04496	LMO7-201	LIM domain only protein 7 isoform X1 [Sus scrofa]	Pig.16786	TTYH1-201	protein tweety homolog 1 isoform X1 [Sus scrofa]	0.927374	0.252933
Chr11_52477801_52507914	Pig.20023.1	Pig.04496	Pig.20023	circRNA	mRNA	1	0.0578947	0.591945	0.0425902	0.223159	Chr12_28849(-0.581436968721|-0.685314685315)	Pig.04496	LMO7-201	LIM domain only protein 7 isoform X1 [Sus scrofa]	Pig.20023	MYADML2-201	myeloid-associated differentiation marker-like protein 2 [Sus scrofa]	0.917997	0.265398
Chr11_52477801_52507914	Pig.23396.1	Pig.04496	Pig.23396	circRNA	mRNA	2	0.00874971	0.704029	0.0106012	0.139892	ChrX_42092(-0.633976453846|-0.734265734266);Chr07_20261(-0.619965924479|-0.769230769231)	Pig.04496	LMO7-201	LIM domain only protein 7 isoform X1 [Sus scrofa]	Pig.23396	FDXR-201	NADPH:adrenodoxin oxidoreductase, mitochondrial isoform X1 [Sus scrofa]	0.991541	0.250347
Chr11_52477801_52507914	Pig.14704.1	Pig.04496	Pig.14704	circRNA	mRNA	1	0.109663	0.637479	0.0257544	0.189707	Chr12_28849(-0.581436968721|-0.657342657343)	Pig.04496	LMO7-201	LIM domain only protein 7 isoform X1 [Sus scrofa]	Pig.14704	PLXND1-201	plexin-D1 isoform X1 [Sus scrofa]	0.938725	0.221121
Chr11_52477801_52507914	Pig.18246.1	Pig.04496	Pig.18246	circRNA	mRNA	1	0.0578947	0.810526	0.00138575	0.0868324	Scaffold1533_43934(-0.751333268085|-0.730168950674)	Pig.04496	LMO7-201	LIM domain only protein 7 isoform X1 [Sus scrofa]	Pig.18246	KIF26B-201	kinesin-like protein KIF26A [Sus scrofa]	0.985714	0.229634
Chr11_52477801_52507914	Pig.18305.1	Pig.04496	Pig.18305	circRNA	mRNA	2	0.0166572	0.640982	0.0247	0.186127	Chr07_20261(-0.619965924479|-0.755244755245);ChrX_42092(-0.633976453846|-0.629370629371)	Pig.04496	LMO7-201	LIM domain only protein 7 isoform X1 [Sus scrofa]	Pig.18305	CYGB	cytoglobin isoform X1 [Sus scrofa]	0.995155	0.271704
Chr11_52477801_52507914	Pig.12679.1	Pig.04496	Pig.12679	circRNA	mRNA	1	0.109663	0.690019	0.0130122	0.149599	Chr12_28849(-0.581436968721|-0.65034965035)	Pig.04496	LMO7-201	LIM domain only protein 7 isoform X1 [Sus scrofa]	Pig.12679	TIE1-201	tyrosine-protein kinase receptor Tie-1 isoform X6 [Sus scrofa]	0.944055	0.185383
Chr11_52477801_52507914	Pig.08095.1	Pig.04496	Pig.08095	circRNA	mRNA	1	0.0578947	0.658495	0.0198921	0.173534	Chr02_7181(-0.891228070175|-0.665500144921)	Pig.04496	LMO7-201	LIM domain only protein 7 isoform X1 [Sus scrofa]	Pig.08095	CTHRC1-202	collagen triple helix repeat-containing protein 1 [Sus scrofa]	0.854999	0.46536
Chr11_52477801_52507914	Pig.15860.1	Pig.04496	Pig.15860	circRNA	mRNA	1	0.263901	0.585965	0.0452682	0.227083	Chr12_28849(-0.581436968721|-0.588442233404)	Pig.04496	LMO7-201	LIM domain only protein 7 isoform X1 [Sus scrofa]	Pig.15860	BSN-201	protein bassoon isoform X2 [Sus scrofa]	0.994012	0.215312
Chr11_52477801_52507914	Pig.09950.1	Pig.04496	Pig.09950	circRNA	mRNA	1	0.0578947	0.712281	0.00934677	0.134792	Chr12_28849(-0.581436968721|-0.70402910068)	Pig.04496	LMO7-201	LIM domain only protein 7 isoform X1 [Sus scrofa]	Pig.09950	FANCC	Fanconi anemia group C protein isoform X1 [Sus scrofa]	0.904632	0.187985
Chr11_52477801_52507914	Pig.14510.1	Pig.04496	Pig.14510	circRNA	mRNA	1	0.109663	0.686516	0.0136736	0.152823	Chr02_7181(-0.891228070175|-0.690018571313)	Pig.04496	LMO7-201	LIM domain only protein 7 isoform X1 [Sus scrofa]	Pig.14510	LRP3-201	low-density lipoprotein receptor-related protein 3 isoform X1 [Sus scrofa]	0.872753	0.468555
Chr11_52477801_52507914	Pig.09185.1	Pig.04496	Pig.09185	circRNA	mRNA	1	0.0578947	0.721542	0.00807444	0.128514	Chr02_7181(-0.891228070175|-0.612960659796)	Pig.04496	LMO7-201	LIM domain only protein 7 isoform X1 [Sus scrofa]	Pig.09185	ORAI2-201	PREDICTED: protein orai-2 [Lipotes vexillifer]	0.815005	0.232497
Chr11_52477801_52507914	Pig.04569.1	Pig.04496	Pig.04569	circRNA	mRNA	1	0.0578947	0.633333	0.027044	0.192927	Chr02_7181(-0.891228070175|-0.677192982456)	Pig.04496	LMO7-201	LIM domain only protein 7 isoform X1 [Sus scrofa]	Pig.04569	C1QTNF2-201	PREDICTED: complement C1q tumor necrosis factor-related protein 2 [Bos taurus]	0.863535	0.544039
Chr11_52477801_52507914	Pig.15118.1	Pig.04496	Pig.15118	circRNA	mRNA	1	0.0578947	0.619966	0.0315202	0.201756	Chr02_7181(-0.891228070175|-0.577934336379)	Pig.04496	LMO7-201	LIM domain only protein 7 isoform X1 [Sus scrofa]	Pig.15118	Gatd3a	ES1 protein homolog, mitochondrial [Sus scrofa]	0.786754	0.336573
Chr11_52477801_52507914	MSTRG.44690.1	Pig.04496	MSTRG.44690	circRNA	mRNA	2	0.0166572	0.638855	0.0253365	0.189707	ChrX_42092(-0.633976453846|-0.738993185884);Chr07_20261(-0.619965924479|-0.749651741449)	Pig.04496	LMO7-201	LIM domain only protein 7 isoform X1 [Sus scrofa]	MSTRG.44690			0.992592	0.307748
Chr11_52477801_52507914	Pig.18822.1	Pig.04496	Pig.18822	circRNA	mRNA	1	0.109663	0.714537	0.00902393	0.1336	Chr12_28849(-0.581436968721|-0.685314685315)	Pig.04496	LMO7-201	LIM domain only protein 7 isoform X1 [Sus scrofa]	Pig.18822	CTC1	LOW QUALITY PROTEIN: CST complex subunit CTC1 [Sus scrofa]	0.917997	0.181082
Chr11_52477801_52507914	Pig.10345.1	Pig.04496	Pig.10345	circRNA	mRNA	1	0.155745	0.736842	0.00626216	0.123344	Chr02_7181(-0.891228070175|-0.677192982456)	Pig.04496	LMO7-201	LIM domain only protein 7 isoform X1 [Sus scrofa]	Pig.10345	ZNF263-201	zinc finger protein 263 isoform X1 [Sus scrofa]	0.863535	0.33739
Chr11_52477801_52507914	Pig.12620.1	Pig.04496	Pig.12620	circRNA	mRNA	1	0.109663	0.7	0.0112573	0.14423	Chr02_7181(-0.891228070175|-0.79298245614)	Pig.04496	LMO7-201	LIM domain only protein 7 isoform X1 [Sus scrofa]	Pig.12620	FAAH-201	fatty-acid amide hydrolase 1 [Sus scrofa]	0.941667	0.724349
Chr11_52477801_52507914	Pig.15616.1	Pig.04496	Pig.15616	circRNA	mRNA	1	0.0578947	0.844134	0.000554262	0.0742364	Chr12_28849(-0.581436968721|-0.776223776224)	Pig.04496	LMO7-201	LIM domain only protein 7 isoform X1 [Sus scrofa]	Pig.15616	SNX17-201	PREDICTED: sorting nexin-17 isoform X1 [Trichechus manatus latirostris]	0.856528	0.0783272
Chr11_52477801_52507914	Pig.09123.1	Pig.04496	Pig.09123	circRNA	mRNA	2	0.00874971	0.819616	0.00110155	0.0854743	Chr07_20261(-0.619965924479|-0.671328671329);ChrX_42092(-0.633976453846|-0.65034965035)	Pig.04496	LMO7-201	LIM domain only protein 7 isoform X1 [Sus scrofa]	Pig.09123	AP4M1-201	AP-4 complex subunit mu-1 isoform X2 [Sus scrofa]	0.999128	0.126096
Chr11_52477801_52507914	Pig.11508.1	Pig.04496	Pig.11508	circRNA	mRNA	1	0.0578947	0.837129	0.000682001	0.0767553	Scaffold1533_43934(-0.751333268085|-0.711285243356)	Pig.04496	LMO7-201	LIM domain only protein 7 isoform X1 [Sus scrofa]	Pig.11508	WBP1-201	WW domain-binding protein 1 isoform X1 [Sus scrofa]	0.972619	0.184528
Chr11_52477801_52507914	Pig.12644.1	Pig.04496	Pig.12644	circRNA	mRNA	1	0.0578947	0.640982	0.0247	0.186127	Chr12_28849(-0.581436968721|-0.804195804196)	Pig.04496	LMO7-201	LIM domain only protein 7 isoform X1 [Sus scrofa]	Pig.12644	UROD-201	uroporphyrinogen decarboxylase [Sus scrofa]	0.839237	0.282414
Chr11_52477801_52507914	MSTRG.15722.1	Pig.04496	MSTRG.15722	circRNA	mRNA	2	0.0264187	0.582456	0.0468938	0.23044	Chr07_20261(-0.619965924479|-0.70402910068);ChrX_42092(-0.633976453846|-0.714536997705)	Pig.04496	LMO7-201	LIM domain only protein 7 isoform X1 [Sus scrofa]	MSTRG.15722			0.9962	0.331827
Chr11_52477801_52507914	Pig.21160.1	Pig.04496	Pig.21160	circRNA	mRNA	1	0.0578947	0.72807	0.00725886	0.127324	ssc-miR-1842(-0.774081747514|-0.630473821505)	Pig.04496	LMO7-201	LIM domain only protein 7 isoform X1 [Sus scrofa]	Pig.21160	SYNPO	LOW QUALITY PROTEIN: synaptopodin [Sus scrofa]	0.897756	0.239612
Chr11_52477801_52507914	Pig.11556.1	Pig.04496	Pig.11556	circRNA	mRNA	2	0.0377002	0.6	0.0391629	0.218444	Scaffold1533_43934(-0.751333268085|-0.63140213609);Chr02_7024(-0.606138612274|-0.636445542888)	Pig.04496	LMO7-201	LIM domain only protein 7 isoform X1 [Sus scrofa]	Pig.11556	MKI67	proliferation marker protein Ki-67 isoform X9 [Sus scrofa]	0.995941	0.302676
Chr11_52477801_52507914	Pig.17175.1	Pig.04496	Pig.17175	circRNA	mRNA	1	0.109663	0.612961	0.0340673	0.207077	Scaffold1533_43934(-0.751333268085|-0.633818533684)	Pig.04496	LMO7-201	LIM domain only protein 7 isoform X1 [Sus scrofa]	Pig.17175	CCDC8-201	coiled-coil domain-containing protein 8 [Sus scrofa]	0.915161	0.34505
Chr11_52477801_52507914	Pig.14753.1	Pig.04496	Pig.14753	circRNA	mRNA	1	0.109663	0.73205	0.00679293	0.123576	Chr02_7181(-0.891228070175|-0.732050159414)	Pig.04496	LMO7-201	LIM domain only protein 7 isoform X1 [Sus scrofa]	Pig.14753	VWCE-201	von Willebrand factor C and EGF domain-containing protein isoform X1 [Sus scrofa]	0.90194	0.474347
Chr11_52477801_52507914	Pig.10307.1	Pig.04496	Pig.10307	circRNA	mRNA	1	0.0578947	0.654992	0.0207937	0.174251	Chr02_7181(-0.891228070175|-0.66199751258)	Pig.04496	LMO7-201	LIM domain only protein 7 isoform X1 [Sus scrofa]	Pig.10307	CCNF-201	Cyclin-F [Fukomys damarensis]	0.852416	0.463779
Chr11_52477801_52507914	Pig.13747.1	Pig.04496	Pig.13747	circRNA	mRNA	1	0.0578947	0.65149	0.0217247	0.178309	Scaffold1533_43934(-0.751333268085|-0.661988246292)	Pig.04496	LMO7-201	LIM domain only protein 7 isoform X1 [Sus scrofa]	Pig.13747	KATNB1-201	katanin p80 WD40 repeat-containing subunit B1 isoform X2 [Sus scrofa]	0.936784	0.339906
Chr11_52477801_52507914	Pig.17713.1	Pig.04496	Pig.17713	circRNA	mRNA	2	0.0264187	0.601055	0.0387288	0.217267	Chr12_28849(-0.581436968721|-0.659653183473);Chr02_7181(-0.891228070175|-0.701231311418)	Pig.04496	LMO7-201	LIM domain only protein 7 isoform X1 [Sus scrofa]	Pig.17713	FBN3-203	fibrillin-3 [Sus scrofa]	0.990897	0.460157
Chr11_52477801_52507914	MSTRG.30061.2	Pig.04496	MSTRG.30061	circRNA	mRNA	1	0.232484	0.638596	0.0254146	0.189707	Chr12_28849(-0.581436968721|-0.595447498088)	Pig.04496	LMO7-201	LIM domain only protein 7 isoform X1 [Sus scrofa]	MSTRG.30061			0.988095	0.19128
Chr11_52477801_52507914	Pig.10363.1	Pig.04496	Pig.10363	circRNA	mRNA	1	0.155745	0.654992	0.0207937	0.174251	Chr02_7181(-0.891228070175|-0.588442233404)	Pig.04496	LMO7-201	LIM domain only protein 7 isoform X1 [Sus scrofa]	Pig.10363	CORO7-PAM16	coronin-7 isoform X1 [Sus scrofa]	0.795369	0.29898
Chr11_52477801_52507914	Pig.20058.1	Pig.04496	Pig.20058	circRNA	mRNA	1	0.0578947	0.644484	0.0236773	0.183841	Scaffold1533_43934(-0.751333268085|-0.647903389988)	Pig.04496	LMO7-201	LIM domain only protein 7 isoform X1 [Sus scrofa]	Pig.20058	PLEKHA4-201	LOW QUALITY PROTEIN: pleckstrin homology domain-containing family A member 4 [Sus scrofa]	0.926081	0.330779
Chr11_52477801_52507914	Pig.22659.1	Pig.04496	Pig.22659	circRNA	mRNA	2	0.00874971	0.760071	0.00411738	0.107867	Chr07_20261(-0.619965924479|-0.79020979021);ChrX_42092(-0.633976453846|-0.741258741259)	Pig.04496	LMO7-201	LIM domain only protein 7 isoform X1 [Sus scrofa]	Pig.22659	GALK1-202	galactokinase [Sus scrofa]	0.98967	0.199682
Chr11_52477801_52507914	Pig.03444.1	Pig.04496	Pig.03444	circRNA	mRNA	1	0.109663	0.592982	0.0421372	0.223159	Chr12_28849(-0.581436968721|-0.633976453846)	Pig.04496	LMO7-201	LIM domain only protein 7 isoform X1 [Sus scrofa]	Pig.03444	ATP7A-203	LOW QUALITY PROTEIN: copper-transporting ATPase 2 [Sus scrofa]	0.956772	0.236391
Chr11_52477801_52507914	Pig.20407.1	Pig.04496	Pig.20407	circRNA	mRNA	1	0.0578947	0.661998	0.0190195	0.170274	Scaffold1533_43934(-0.751333268085|-0.626776105532)	Pig.04496	LMO7-201	LIM domain only protein 7 isoform X1 [Sus scrofa]	Pig.20407	SLC49A3-202	major facilitator superfamily domain-containing protein 7 isoform X5 [Sus scrofa]	0.909617	0.2904
Chr11_52477801_52507914	Pig.11984.1	Pig.04496	Pig.11984	circRNA	mRNA	2	0.0166572	0.65614	0.020495	0.174251	Chr07_20261(-0.619965924479|-0.879160717765);ChrX_42092(-0.633976453846|-0.830123864981)	Pig.04496	LMO7-201	LIM domain only protein 7 isoform X1 [Sus scrofa]	Pig.11984	HTR4-204	5-hydroxytryptamine receptor 4 [Sus scrofa]	0.976079	0.357002
Chr11_52477801_52507914	Pig.21962.1	Pig.04496	Pig.21962	circRNA	mRNA	1	0.0578947	0.697024	0.011761	0.145686	Chr02_7181(-0.891228070175|-0.70402910068)	Pig.04496	LMO7-201	LIM domain only protein 7 isoform X1 [Sus scrofa]	Pig.21962	SCUBE1-201	LOW QUALITY PROTEIN: signal peptide, CUB and EGF-like domain-containing protein 1 [Sus scrofa]	0.882653	0.481026
Chr11_52477801_52507914	Pig.08625.1	Pig.04496	Pig.08625	circRNA	mRNA	2	0.0166572	0.62566	0.029553	0.199534	Chr02_7024(-0.606138612274|-0.678640681154);Chr02_7181(-0.891228070175|-0.627417489163)	Pig.04496	LMO7-201	LIM domain only protein 7 isoform X1 [Sus scrofa]	Pig.08625	CROCC-201	LOW QUALITY PROTEIN: rootletin [Sus scrofa]	0.983319	0.3481
Chr11_52477801_52507914	Pig.09711.1	Pig.04496	Pig.09711	circRNA	mRNA	1	0.0578947	0.587719	0.0444706	0.225097	Chr02_7024(-0.606138612274|-0.663186952253)	Pig.04496	LMO7-201	LIM domain only protein 7 isoform X1 [Sus scrofa]	Pig.09711	NYNRIN-201	LOW QUALITY PROTEIN: protein NYNRIN [Sus scrofa]	0.955056	0.27571
Chr11_52477801_52507914	Pig.08573.1	Pig.04496	Pig.08573	circRNA	mRNA	1	0.0578947	0.842105	0.00058917	0.0767553	ssc-miR-1842(-0.774081747514|-0.812610703272)	Pig.04496	LMO7-201	LIM domain only protein 7 isoform X1 [Sus scrofa]	Pig.08573	MIIP-201	migration and invasion-inhibitory protein [Sus scrofa]	0.975717	0.264606
[truncated: 991 more rows]

## Sheet: fat_ceRNA
ceRNA1	ceRNA2	ceRNA1_name	ceRNA2_name	ceRNA1_type	ceRNA2_type	hit_mirna_num	pvalue	corr	corr_pvalue	corr_qvalue	hit_mirna_corr	ceRNA1_gene	ceRNA1_gene_name	ceRNA1_gene_description	ceRNA2_gene	ceRNA2_gene_name	ceRNA2_gene_description	regu_similar	sens_corr
[truncated: 2,172 more rows]

[truncated: 1 more sheets: liver_ceRNA]
